# Supplementary material
Source: PubMed Central journal article supplement (PMC4334740)

## Supporting Information

### The Enantioselective Construction of Complex Tetracyclic Natural Product Skeletons with Friedel-Crafts Alkylation and Palladium-Catalyzed Cycloalkenylation Reactions

Sarah J. Burke, William P. Malachowski\*, Sharan K. Mehta and Roselyn Appenteng

Department of Chemistry, Bryn Mawr College, Bryn Mawr, Pennsylvania 19010-2899 USA.

| Page Number | Item                                                                                 |
|-------------|--------------------------------------------------------------------------------------|
| S3-S5       | <sup>1</sup> H NMR, <sup>13</sup> C NMR and GC/MS for <b>2a</b>                      |
| S6-S9       | <sup>1</sup> H NMR, <sup>13</sup> C NMR and GC/MS for <b>2b</b>                      |
| S10-S13     | <sup>1</sup> H NMR, <sup>13</sup> C NMR and GC/MS for <b>2c</b>                      |
| S14-S17     | <sup>1</sup> H NMR, <sup>13</sup> C NMR and GC/MS for <b>2d</b>                      |
| S18-S20     | <sup>1</sup> H NMR, <sup>13</sup> C NMR and GC/MS for <b>2e</b>                      |
| S21-S24     | <sup>1</sup> H NMR, <sup>13</sup> C NMR and GC/MS for <b>3a</b>                      |
| S25-S29     | <sup>1</sup> H NMR, <sup>13</sup> C NMR and GC/MS for <b>3b</b>                      |
| S30-S34     | <sup>1</sup> H NMR, <sup>13</sup> C NMR and GC/MS for <b>3c</b>                      |
| S35-S37     | <sup>1</sup> H NMR, <sup>13</sup> C NMR and GC/MS for <b>3d</b>                      |
| S38-S42     | <sup>1</sup> H NMR, <sup>13</sup> C NMR and GC/MS for <b>3e</b>                      |
| S43-S46     | <sup>1</sup> H NMR, <sup>13</sup> C NMR and GC/MS for <b>4a</b>                      |
| S47-S51     | <sup>1</sup> H NMR, <sup>13</sup> C NMR and GC/MS for <b>4b</b>                      |
| S52-S55     | <sup>1</sup> H NMR, <sup>13</sup> C NMR and GC/MS for <b>4c</b>                      |
| S56-S58     | <sup>1</sup> H NMR, <sup>13</sup> C NMR and GC/MS for <b>4d</b>                      |
| S59-S63     | <sup>1</sup> H NMR, <sup>13</sup> C NMR and GC/MS for <b>4e</b>                      |
| S64         | <sup>1</sup> H NMR and <sup>13</sup> C NMR for <b>5a</b>                             |
| S65         | <sup>1</sup> H NMR and <sup>13</sup> C NMR for <b>5b</b>                             |
| S66         | <sup>1</sup> H NMR and <sup>13</sup> C NMR for <b>5c</b>                             |
| S67         | <sup>1</sup> H NMR and <sup>13</sup> C NMR for <b>5d</b>                             |
| S68         | <sup>1</sup> H NMR and <sup>13</sup> C NMR for <b>5e</b>                             |
| S69         | <sup>1</sup> H NMR and <sup>13</sup> C NMR for <b>6a</b>                             |
| S70         | <sup>1</sup> H NMR and <sup>13</sup> C NMR for <b>6b</b>                             |
| S71         | <sup>1</sup> H NMR and <sup>13</sup> C NMR for <b>6c</b>                             |
| S72-S75     | <sup>1</sup> H NMR, <sup>13</sup> C NMR and LC Enantioselectivity data for <b>6d</b> |
| S76         | <sup>1</sup> H NMR and <sup>13</sup> C NMR for <b>6e</b>                             |
| S77         | <sup>1</sup> H NMR and <sup>13</sup> C NMR for <b>7a</b>                             |
| S78         | <sup>1</sup> H NMR and <sup>13</sup> C NMR for <b>7b</b>                             |
| S79         | <sup>1</sup> H NMR and <sup>13</sup> C NMR for <b>7c</b>                             |
| S80         | <sup>1</sup> H NMR and <sup>13</sup> C NMR for <b>7d</b>                             |
| S81         | <sup>1</sup> H NMR and <sup>13</sup> C NMR for <b>7e</b>                             |
| S82         | <sup>1</sup> H NMR and <sup>13</sup> C NMR for <b>8a</b>                             |
| S83         | <sup>1</sup> H NMR and <sup>13</sup> C NMR for <b>8b</b>                             |
| S84         | <sup>1</sup> H NMR and <sup>13</sup> C NMR for <b>8c</b>                             |
| S85         | <sup>1</sup> H NMR and <sup>13</sup> C NMR for <b>8d</b>                             |
| S86         | <sup>1</sup> H NMR and <sup>13</sup> C NMR for <b>8e</b>                             |
| S87-S89     | <sup>1</sup> H NMR, <sup>13</sup> C NMR and GC/MS for <b>9a</b>                      |
| S90-S92     | <sup>1</sup> H NMR, <sup>13</sup> C NMR and GC/MS for <b>9b</b>                      |

|           |                                                                                     |
|-----------|-------------------------------------------------------------------------------------|
| S93-S96   | <sup>1</sup> H NMR, <sup>13</sup> C NMR and GC/MS for <b>9c</b>                     |
| S97-S99   | <sup>1</sup> H NMR, <sup>13</sup> C NMR and GC/MS for <b>9d</b>                     |
| S100-S102 | <sup>1</sup> H NMR, <sup>13</sup> C NMR and GC/MS for <b>9e</b>                     |
| S103-S106 | <sup>1</sup> H NMR, <sup>13</sup> C NMR and GC/MS for <b>10a</b>                    |
| S107-S111 | <sup>1</sup> H NMR, <sup>13</sup> C NMR and GC/MS for <b>10b</b>                    |
| S112-S115 | <sup>1</sup> H NMR, <sup>13</sup> C NMR and GC/MS for <b>10c</b>                    |
| S116-S119 | <sup>1</sup> H NMR, <sup>13</sup> C NMR and GC/MS for <b>10d</b>                    |
| S120-S123 | <sup>1</sup> H NMR, <sup>13</sup> C NMR and GC/MS for <b>10e</b>                    |
| S124      | <sup>1</sup> H NMR and <sup>13</sup> C NMR for <b>11b</b>                           |
| S125-S126 | <sup>1</sup> H NMR and <sup>13</sup> C NMR for <b>11d</b>                           |
| S127      | <sup>1</sup> H NMR and <sup>13</sup> C NMR for <b>11e</b>                           |
| S128      | <sup>1</sup> H NMR and <sup>13</sup> C NMR for <b>12a</b>                           |
| S129-S130 | <sup>1</sup> H NMR and <sup>13</sup> C NMR for <b>12b</b>                           |
| S131-S132 | <sup>1</sup> H NMR and <sup>13</sup> C NMR for <b>12d</b>                           |
| S133-S134 | <sup>1</sup> H NMR and <sup>13</sup> C NMR for <b>12e</b>                           |
| S135-S137 | <sup>1</sup> H NMR, <sup>13</sup> C NMR and GC/MS for <b>13b</b>                    |
| S138-S140 | <sup>1</sup> H NMR, <sup>13</sup> C NMR and GC/MS for <b>13d</b>                    |
| S141-S143 | <sup>1</sup> H NMR, <sup>13</sup> C NMR and GC/MS for <b>13e</b>                    |
| S144-S146 | <sup>1</sup> H NMR, <sup>13</sup> C NMR and GC/MS for <b>14b</b>                    |
| S147-S149 | <sup>1</sup> H NMR, <sup>13</sup> C NMR and GC/MS for <b>14d</b>                    |
| S150-S152 | <sup>13</sup> C NMR and GC/MS for <b>14e</b>                                        |
| S153-S156 | <sup>1</sup> H NMR, <sup>13</sup> C NMR, GC/MS, COSY and NOESY for <b>15b</b>       |
| S157-S160 | <sup>1</sup> H NMR, <sup>13</sup> C NMR, GC/MS, COSY and NOESY for <b>15d</b>       |
| S161-S163 | <sup>1</sup> H NMR, <sup>13</sup> C NMR and GC/MS for <b>15e</b>                    |
| S164-S167 | <sup>1</sup> H NMR, <sup>13</sup> C NMR, GC/MS, COSY and NOESY for <b>16b</b>       |
| S168-S172 | <sup>1</sup> H NMR, <sup>13</sup> C NMR, GC/MS, COSY, NOESY and HSQC for <b>16d</b> |
| S173-S175 | <sup>1</sup> H NMR, <sup>13</sup> C NMR and GC/MS for <b>16e</b>                    |
| S176-S181 | <sup>1</sup> H NMR, COSY and GC/MS for <b>17</b> and <b>18</b>                      |
| S182-S187 | <sup>1</sup> H NMR, COSY and GC/MS for <b>19</b> and <b>20</b>                      |
| S188-S193 | <sup>1</sup> H NMR, <sup>13</sup> C NMR and GC/MS for <b>21</b>                     |
| S194-S198 | <sup>1</sup> H NMR and GC/MS for <b>25-28</b>                                       |
| S199-S202 | <sup>1</sup> H NMR, <sup>13</sup> C NMR, GC/MS, COSY, HSQC and NOESY for <b>26</b>  |

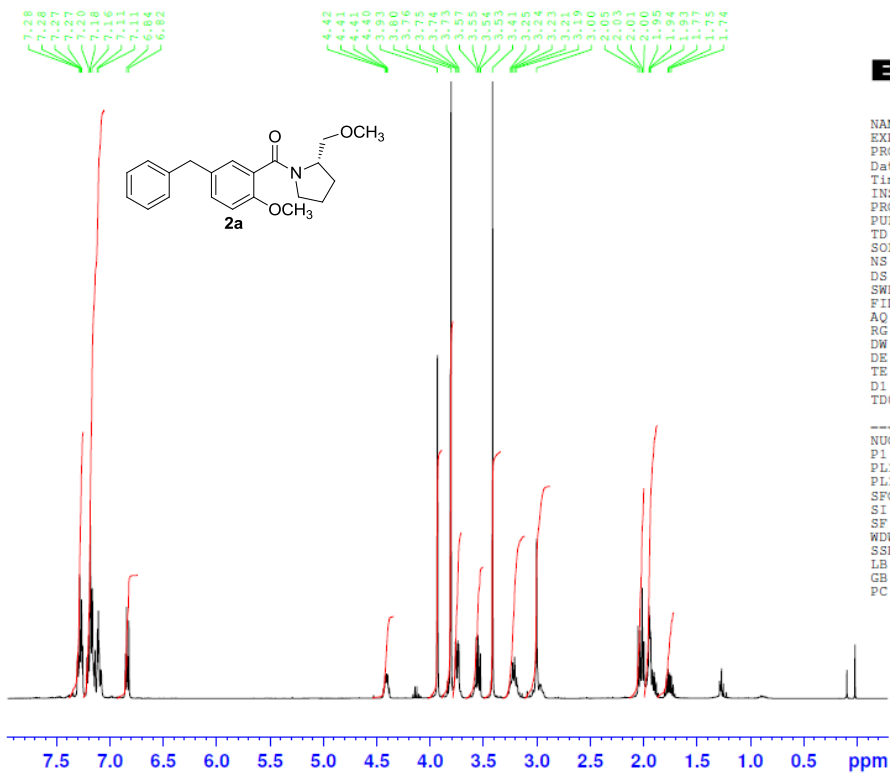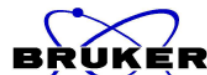

```

NAME      sjb_77_106fp4
EXPNO     1
PROCNO    1
Date_     20130617
Time      7.50
INSTRUM   spect
PROBHD    5 mm PABBO BB-
PULPROG   zq30
TD         65536
SOLVENT   CDC13
NS         16
DS         2
SWH        8223.685 Hz
FIDRES     0.125483 Hz
AQ         3.9846387 sec
RG         45.2
DW         60.800 usec
DE         6.50 usec
TE         301.2 K
D1         1.00000000 sec
TDO        1
  
```

```

----- CHANNEL f1 -----
NUC1      1H
P1        12.50 usec
PL1       -2.00 dB
PL1W      12.14226913 W
SFO1      400.1524711 MHz
SI         32768
SF         400.1500000 MHz
WDW        EM
SSB        0
LB         0.30 Hz
GB         0
PC         1.00
  
```

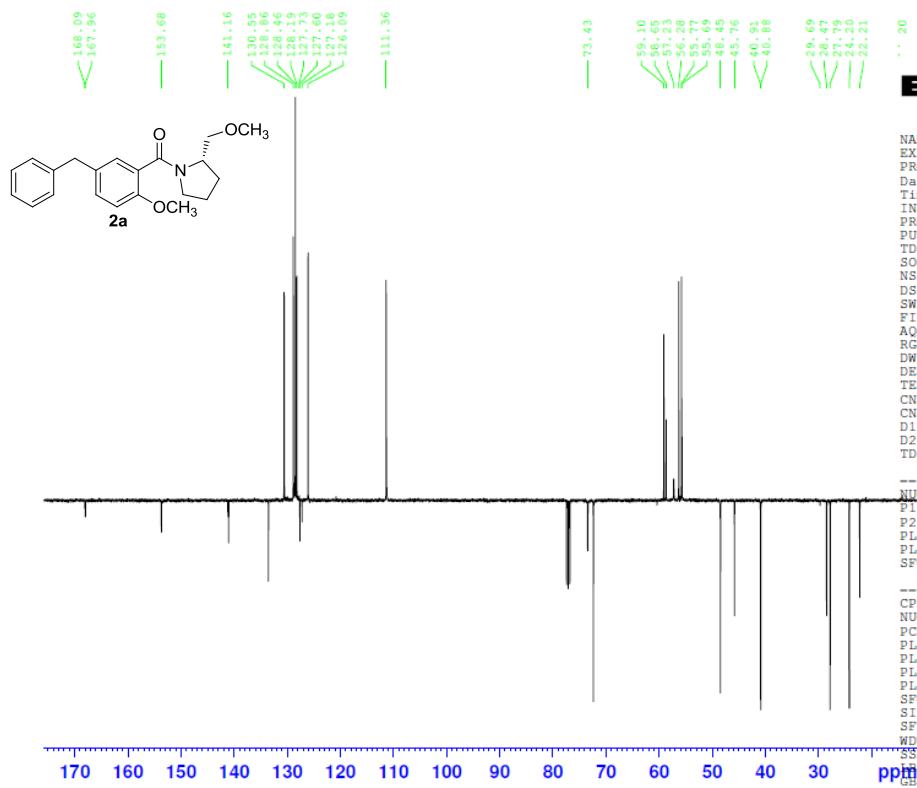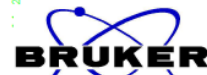

```

NAME      sjb_77_106fp APT2
EXPNO     1
PROCNO    1
Date_     20130617
Time      9.07
INSTRUM   spect
PROBHD    5 mm PABBO BB-
PULPROG   jmod
TD         65536
SOLVENT   CDC13
NS         1024
DS         4
SWH        24038.461 Hz
FIDRES     0.366798 Hz
AQ         1.3631988 sec
RG         203
DW         20.800 usec
DE         6.50 usec
TE         301.2 K
CNST2     145.0000000
CNST11    1.0000000
D1         2.00000000 sec
D20        0.00689655 sec
TDO        1
  
```

```

----- CHANNEL f1 -----
NUC1      13C
P1         8.00 usec
P2         16.00 usec
PL1        -2.00 dB
PL1W       56.13311005 W
SFO1       100.6278593 MHz
  
```

```

----- CHANNEL f2 -----
CPDPRG2   waltz16
NUC2       1H
PCPD2     80.00 usec
PL2        -2.00 dB
PL12       14.00 dB
PL2W      12.14226913 W
PL12W     0.30500001 W
SFO2      400.1515629 MHz
SI         32768
SF         100.6177980 MHz
WDW        EM
SSB        0
LB         1.00 Hz
GB         0
PC         1.40
  
```

Area Percent Report

Data Path : C:\msdchem\1\DATA\  
Data File : sjb\_77\_106 fr6-10.D  
Acq On : 11 Jun 2013 19:45  
Operator : sjb  
Sample : sjb\_77\_106 fr6-10  
Misc :  
ALS Vial : 95 Sample Multiplier: 1

Integration Parameters: autoint1.e  
Integrator: ChemStation

Method : C:\msdchem\1\5973N\PRECISION.M  
Title :

Signal : TIC: sjb\_77\_106 fr6-10.D\data.ms

| peak # | R.T. min | first scan | max scan | last scan | PK TY | peak height | corr. area | corr. % max. | % of total |
|--------|----------|------------|----------|-----------|-------|-------------|------------|--------------|------------|
| 1      | 7.462    | 495        | 503      | 539       | BV 3  | 88847       | 5339264    | 0.53%        | 0.524%     |
| 2      | 8.516    | 679        | 688      | 720       | BV 3  | 78689       | 3977198    | 0.40%        | 0.390%     |
| 3      | 11.592   | 1205       | 1225     | 1232      | PV 7  | 20748       | 714829     | 0.07%        | 0.070%     |
| 4      | 11.765   | 1241       | 1255     | 1306      | PV 2  | 38376200    | 1003659892 | 100.00%      | 98.448%    |
| 5      | 12.060   | 1306       | 1307     | 1314      | VV 4  | 119329      | 2690695    | 0.27%        | 0.264%     |
| 6      | 12.107   | 1314       | 1315     | 1321      | VV 6  | 81401       | 1599566    | 0.16%        | 0.157%     |
| 7      | 12.145   | 1321       | 1322     | 1337      | VV 9  | 51004       | 1503320    | 0.15%        | 0.147%     |

Sum of corrected areas: 1019484764

Abundance

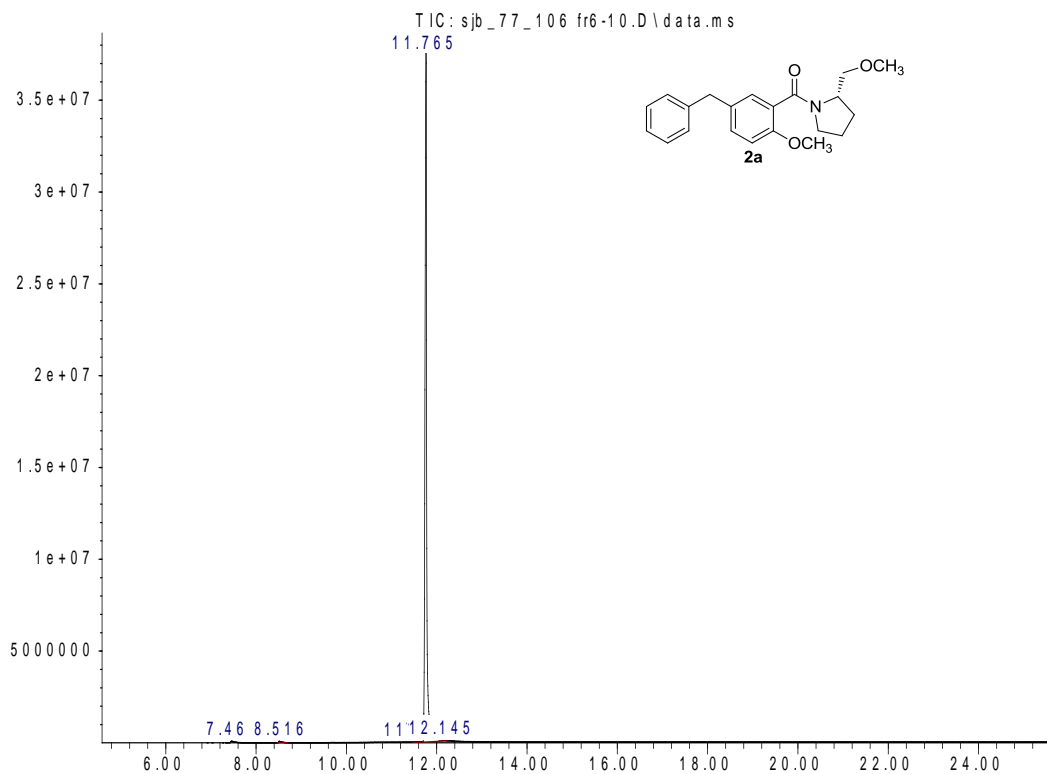

Abundance

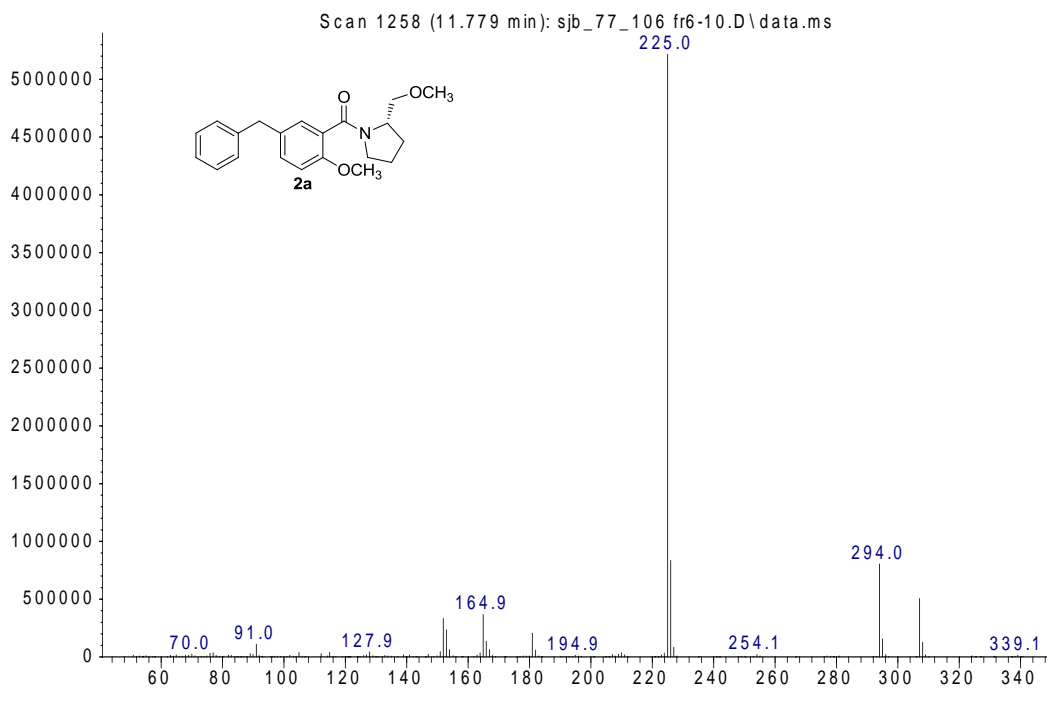

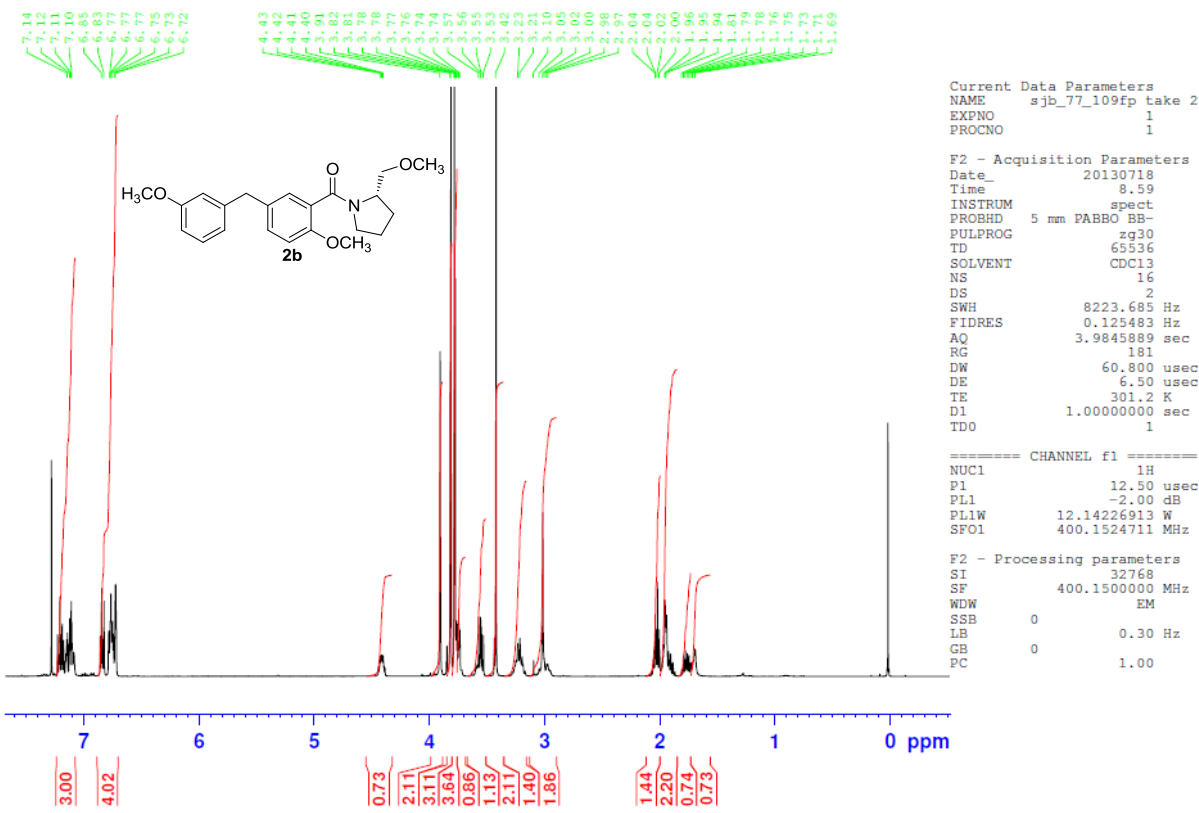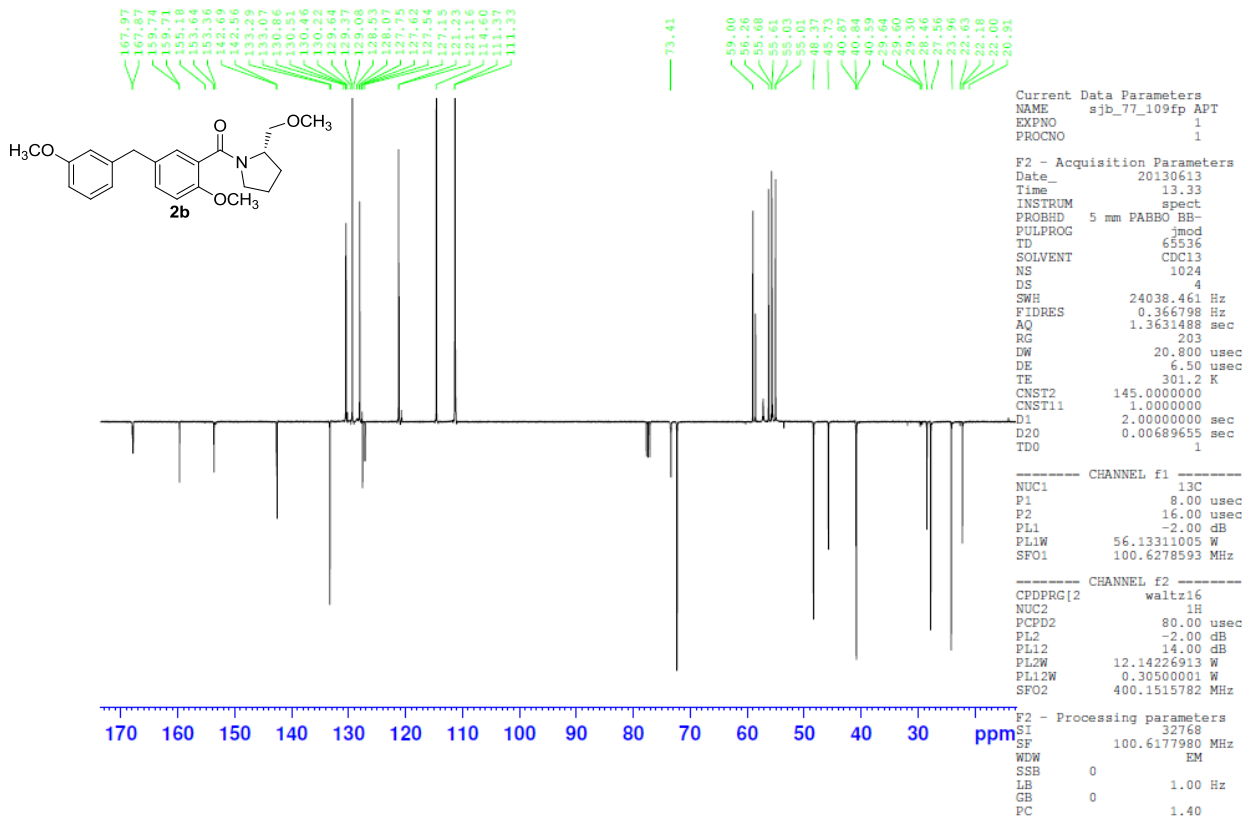

Area Percent Report

Data Path : C:\msdchem\1\DATA\  
Data File : sjb\_77\_140fp.D  
Acq On : 9 Jul 2013 13:36  
Operator : AK  
Sample : sjb\_77\_140fp  
Misc :  
ALS Vial : 80 Sample Multiplier: 1

Integration Parameters: autoint1.e  
Integrator: ChemStation

Method : C:\msdchem\1\5973N\PRECISION.M  
Title :

Signal : TIC: sjb\_77\_140fp.D\data.ms

| peak # | R.T. min | first scan | max scan | last scan | PK TY | peak height | corr. area | corr. % max. | % of total |
|--------|----------|------------|----------|-----------|-------|-------------|------------|--------------|------------|
| 1      | 7.369    | 479        | 487      | 520       | BV    | 1310017     | 25296056   | 4.59%        | 4.282%     |
| 2      | 7.889    | 572        | 578      | 614       | PV    | 448612      | 11314701   | 2.05%        | 1.916%     |
| 3      | 13.511   | 1536       | 1561     | 1634      | PV    | 14301284    | 551191459  | 100.00%      | 93.314%    |
| 4      | 13.937   | 1634       | 1635     | 1642      | VV 6  | 65507       | 1414234    | 0.26%        | 0.239%     |
| 5      | 13.986   | 1642       | 1644     | 1649      | VV 6  | 40178       | 838374     | 0.15%        | 0.142%     |
| 6      | 14.025   | 1649       | 1650     | 1656      | VV 6  | 31550       | 525723     | 0.10%        | 0.089%     |
| 7      | 14.066   | 1656       | 1658     | 1660      | VV 3  | 14484       | 107248     | 0.02%        | 0.018%     |

Sum of corrected areas: 590687795

Abundance

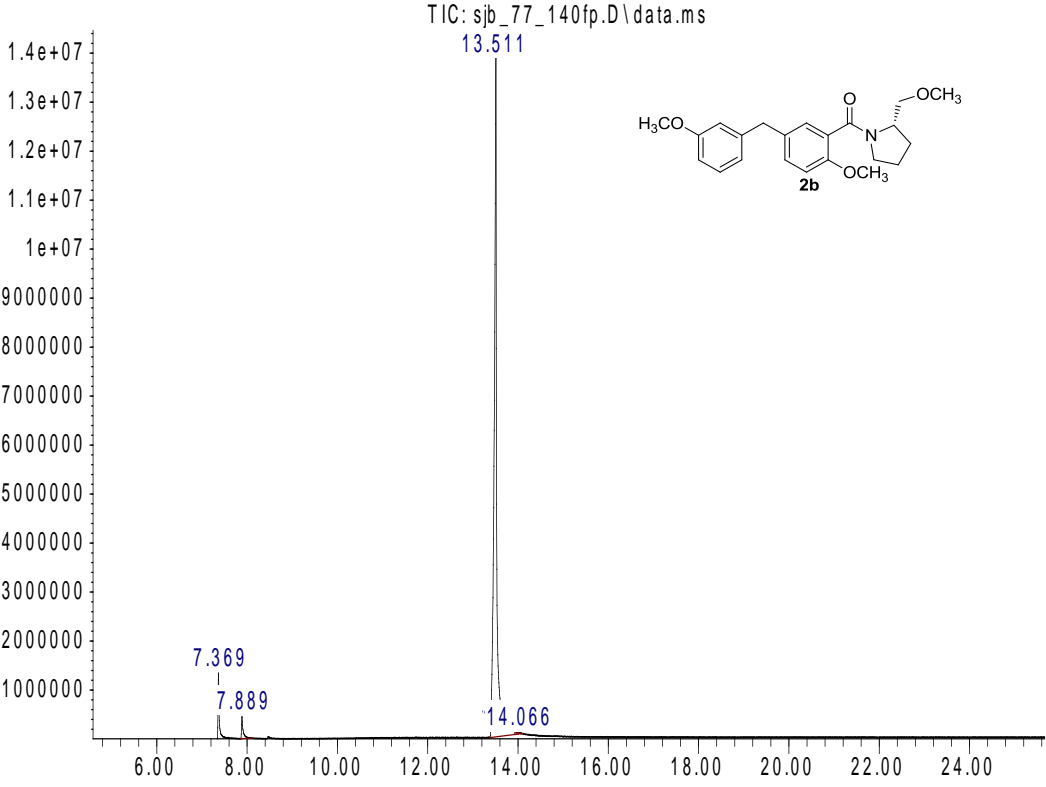

Time-->



Abundance

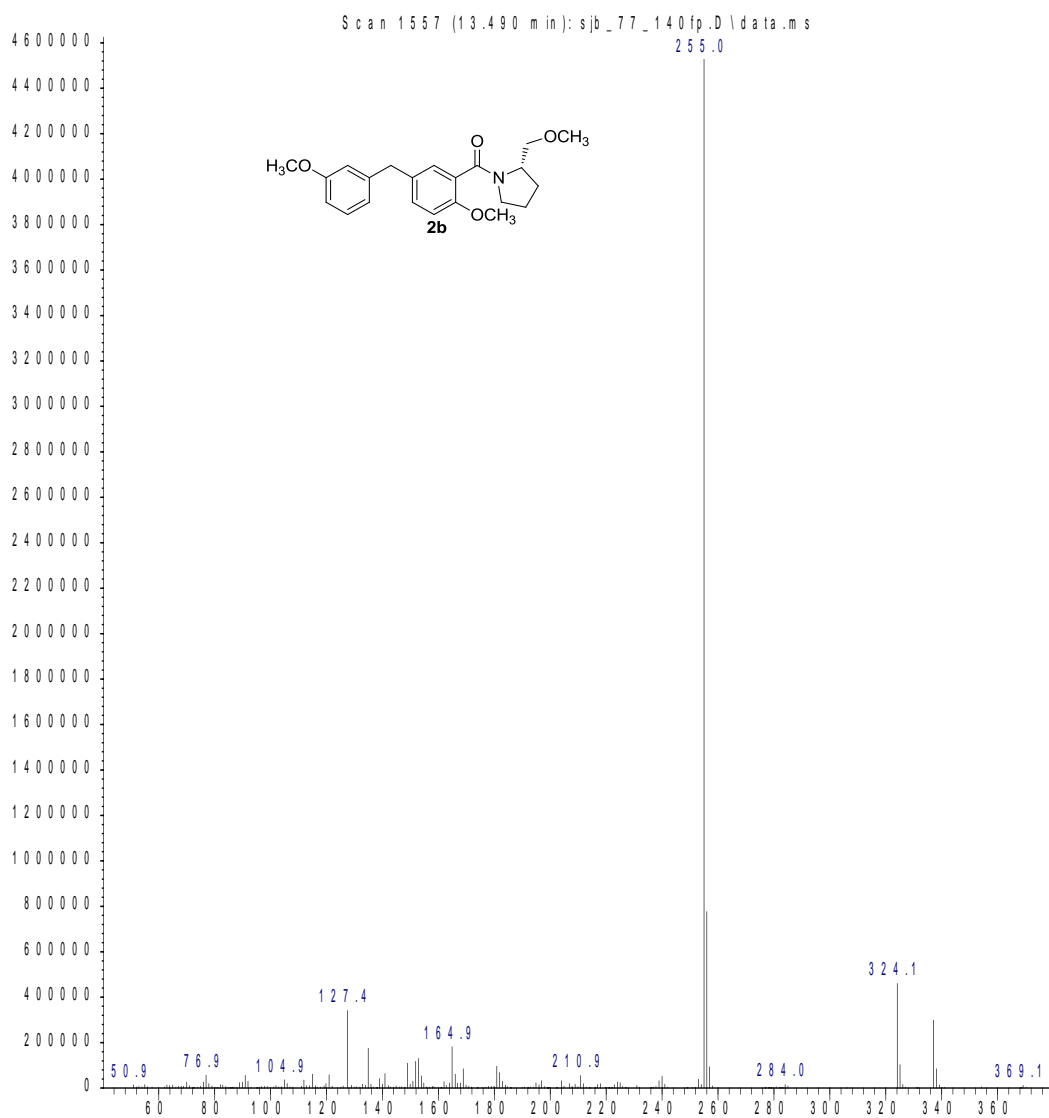

m/z-->

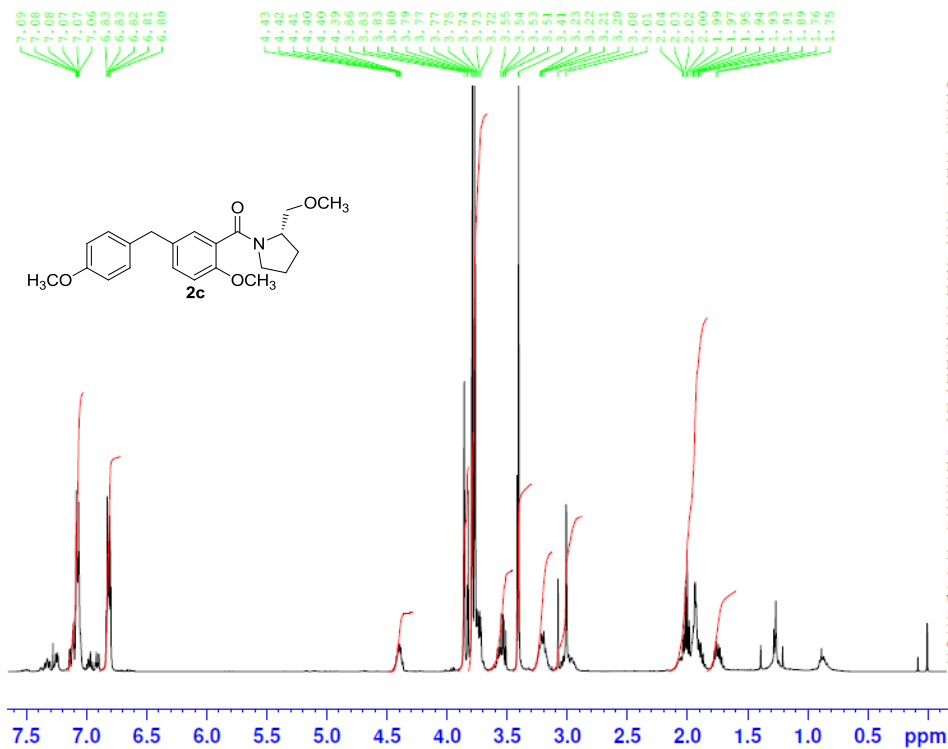

Current Data Parameters  
 NAME sjb\_77\_190fp  
 EXPNO 1  
 PROCNO 1

F2 - Acquisition Parameters  
 Date\_ 20130910  
 Time 9.08  
 INSTRUM spect  
 PROBHD 5 mm PABBO BB-  
 PULPROG zg30  
 TD 65536  
 SOLVENT CDC13  
 NS 16  
 DS 2  
 SWH 8223.685 Hz  
 FIDRES 0.125483 Hz  
 AQ 3.9845889 sec  
 RG 40.3  
 DW 60.800 usec  
 DE 6.50 usec  
 TE 298.2 K  
 D1 1.00000000 sec  
 TDO 1

==== CHANNEL f1 =====  
 NUC1 1H  
 P1 12.50 usec  
 PL1 -2.00 dB  
 PL1W 12.14226913 W  
 SFO1 400.1524711 MHz

F2 - Processing parameters  
 SI 32768  
 SF 400.1500000 MHz  
 WDW EM  
 SSB 0  
 LB 0.30 Hz  
 GB 0  
 PC 1.00

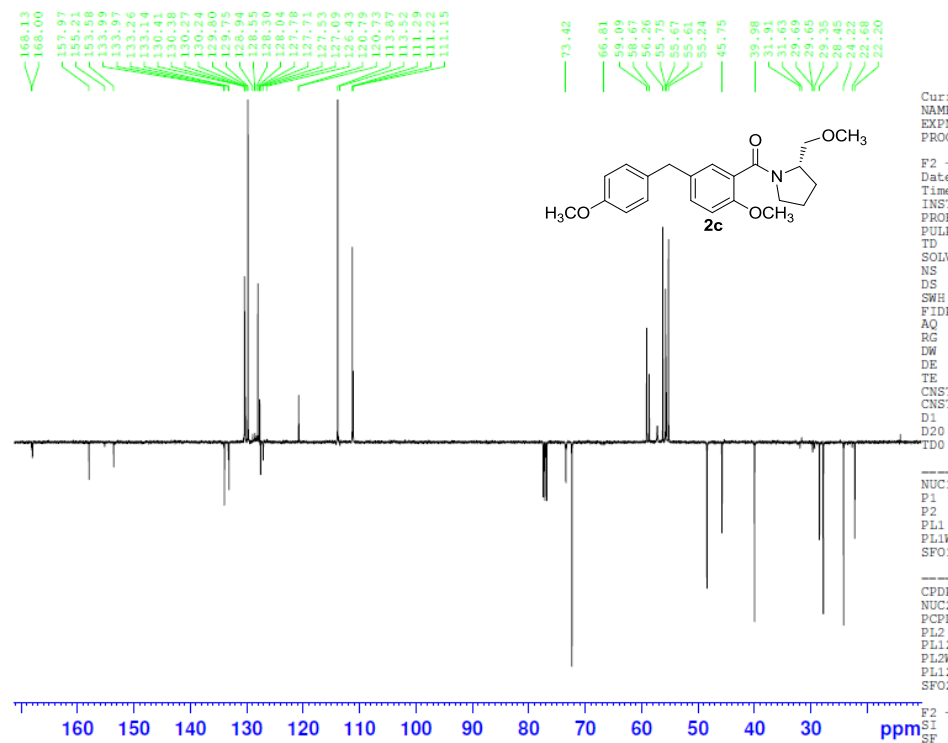

Current Data Parameters  
 NAME sjb\_77\_190fp APT2  
 EXPNO 1  
 PROCNO 1

F2 - Acquisition Parameters  
 Date\_ 20130923  
 Time 10.38  
 INSTRUM spect  
 PROBHD 5 mm PABBO BB-  
 PULPROG jmod  
 TD 65536  
 SOLVENT CDC13  
 NS 1024  
 DS 4  
 SWH 24038.461 Hz  
 FIDRES 0.366798 Hz  
 AQ 1.3631488 sec  
 RG 203  
 DW 20.800 usec  
 DE 6.50 usec  
 TE 298.2 K  
 CNST2 145.0000000  
 CNST11 1.0000000  
 D1 2.00000000 sec  
 D20 0.00689655 sec  
 TDO 1

==== CHANNEL f1 =====  
 NUC1 13C  
 P1 8.00 usec  
 P2 16.00 usec  
 PL1 -2.00 dB  
 PL1W 56.13311005 W  
 SFO1 100.6278593 MHz

==== CHANNEL f2 =====  
 CPDPRG[2] waltz16  
 NUC2 1H  
 PCPD2 75.00 usec  
 PL2 -2.00 dB  
 PL12 13.39 dB  
 PL2W 12.14226913 W  
 PL12W 0.35099408 W  
 SFO2 400.1514874 MHz

F2 - Processing parameters  
 SI 32768  
 SF 100.6177980 MHz  
 WDW EM  
 SSB 0  
 LB 1.00 Hz  
 GB 0  
 PC 1.40

Area Percent Report

Data Path : C:\msdchem\1\DATA\  
Data File : sjb\_77\_190fp.D  
Acq On : 10 Sep 2013 9:25  
Operator : sjb  
Sample : sjb\_77\_190fp  
Misc :  
ALS Vial : 85 Sample Multiplier: 1

Integration Parameters: autoint1.e  
Integrator: ChemStation

Method : C:\msdchem\1\5973N\PRECISION.M  
Title :

Signal : TIC: sjb\_77\_190fp.D\data.ms

| peak # | R.T. min | first scan | max scan | last scan | PK TY | peak height | corr. area | corr. % max. | % of total |
|--------|----------|------------|----------|-----------|-------|-------------|------------|--------------|------------|
| 1      | 7.370    | 481        | 487      | 517       | BV    | 1069928     | 19231620   | 7.04%        | 6.523%     |
| 2      | 13.905   | 1598       | 1629     | 1660      | BV    | 6770640     | 273181350  | 100.00%      | 92.651%    |
| 3      | 14.085   | 1660       | 1661     | 1687      | VV 6  | 69181       | 2435562    | 0.89%        | 0.826%     |

Sum of corrected areas: 29484853

Abundance

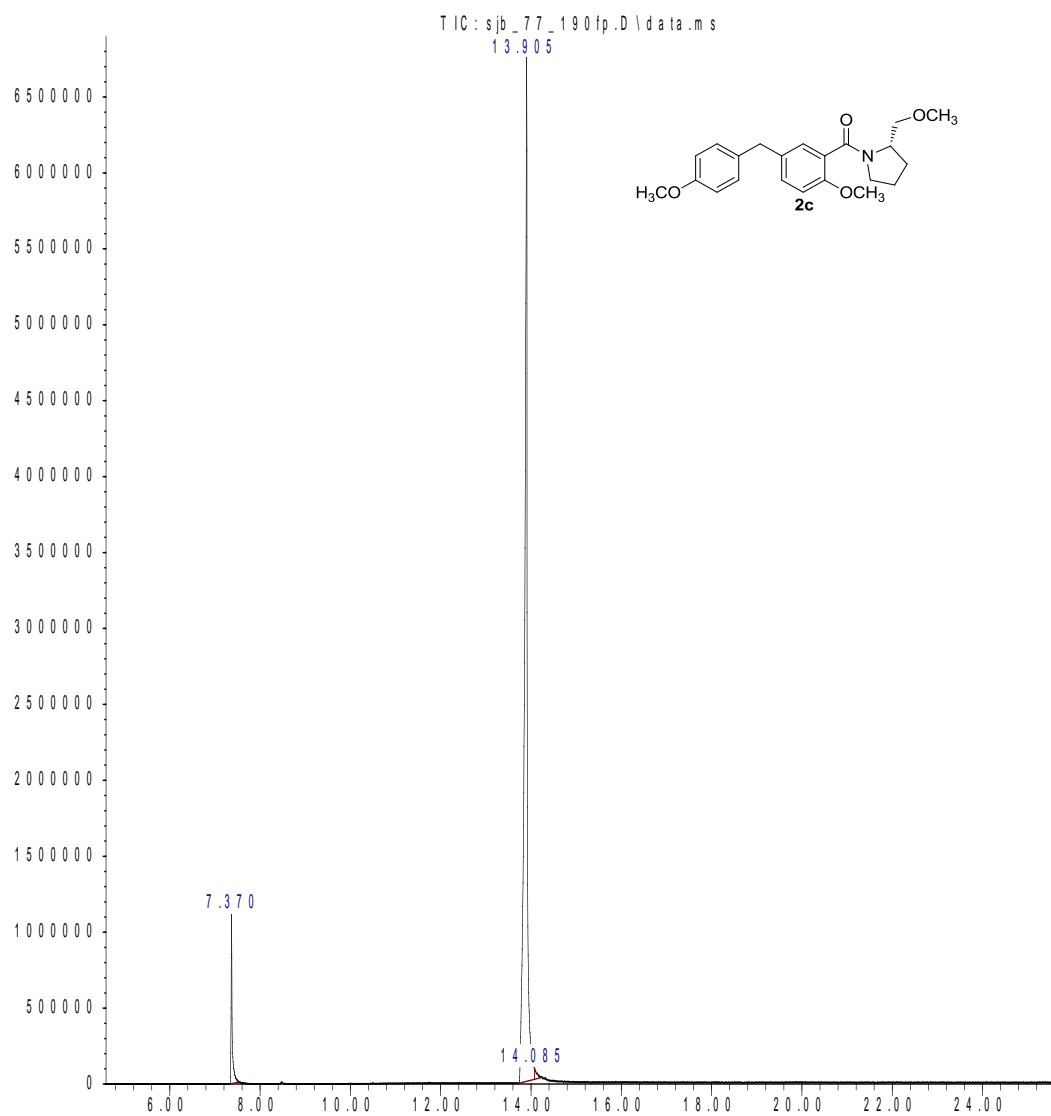

Abundance

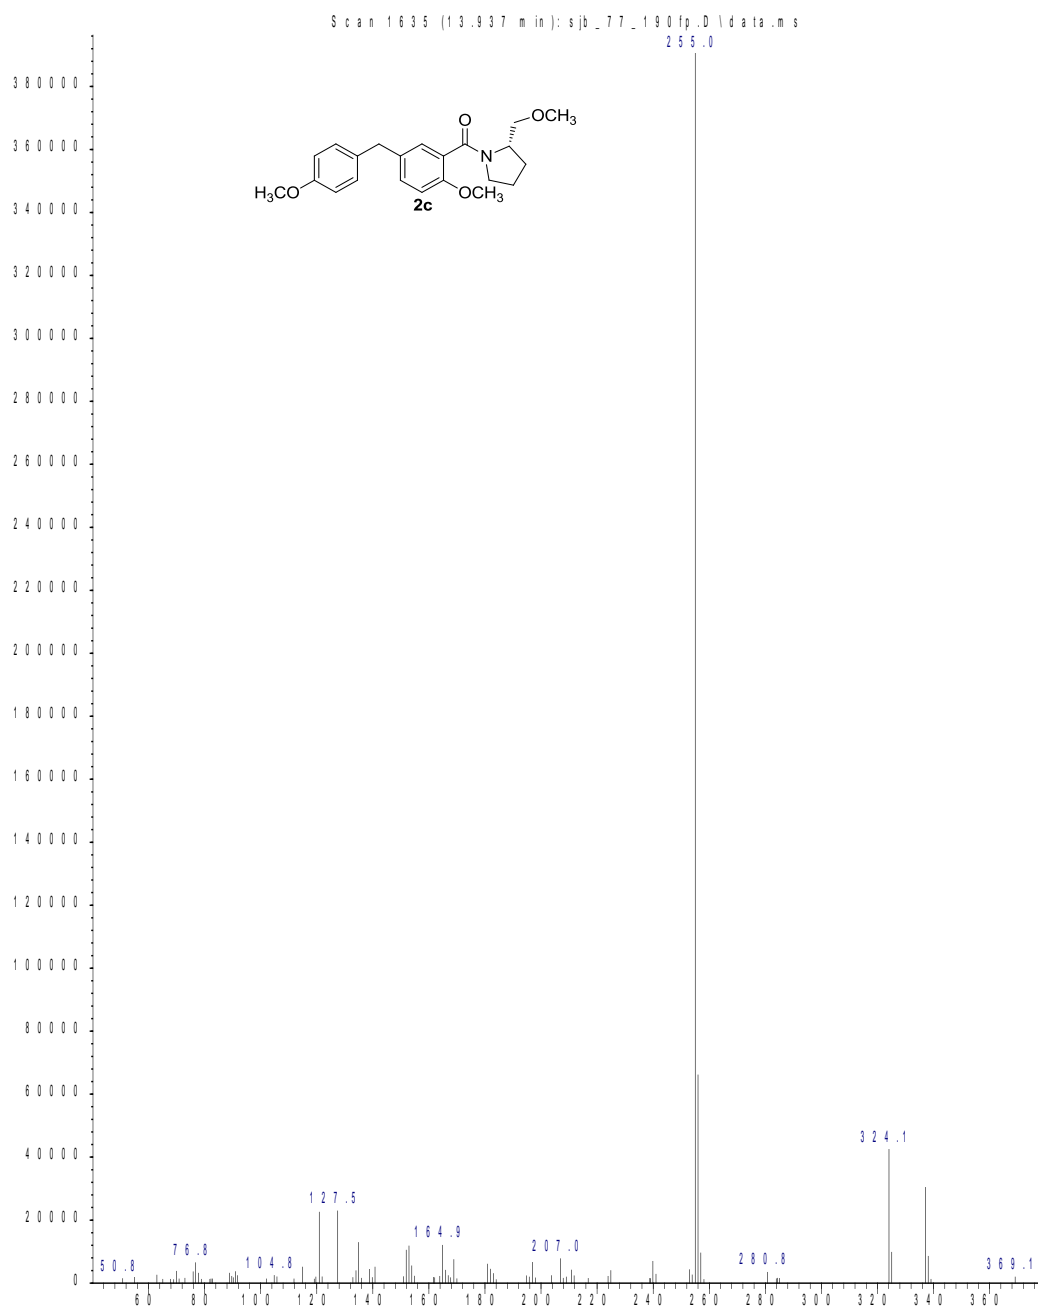

m/z-->



Area Percent Report

Data Path : C:\msdchem\1\DATA\  
Data File : sjb\_81\_015fp2.D  
Acq On : 11 Oct 2013 15:54  
Operator : sjb  
Sample : sjb\_81\_015fp2  
Misc :  
ALS Vial : 90 Sample Multiplier: 1

Integration Parameters: atuneWPMMar14.e  
Integrator: ChemStation

Method : C:\msdchem\1\METHODS\ckr3.m  
Title :

Signal : TIC: sjb\_81\_015fp2.D\data.ms

| peak # | R.T. min | first scan | max scan | last scan | PK TY | peak height | corr. area | corr. % max. | % of total |
|--------|----------|------------|----------|-----------|-------|-------------|------------|--------------|------------|
| 1      | 15.643   | 1895       | 1933     | 1951      | BV    | 864446      | 36310266   | 100.00%      | 100.000%   |

Sum of corrected areas: 36310266

ckr3.m Wed Mar 19 11:39:48 2014

Abundance

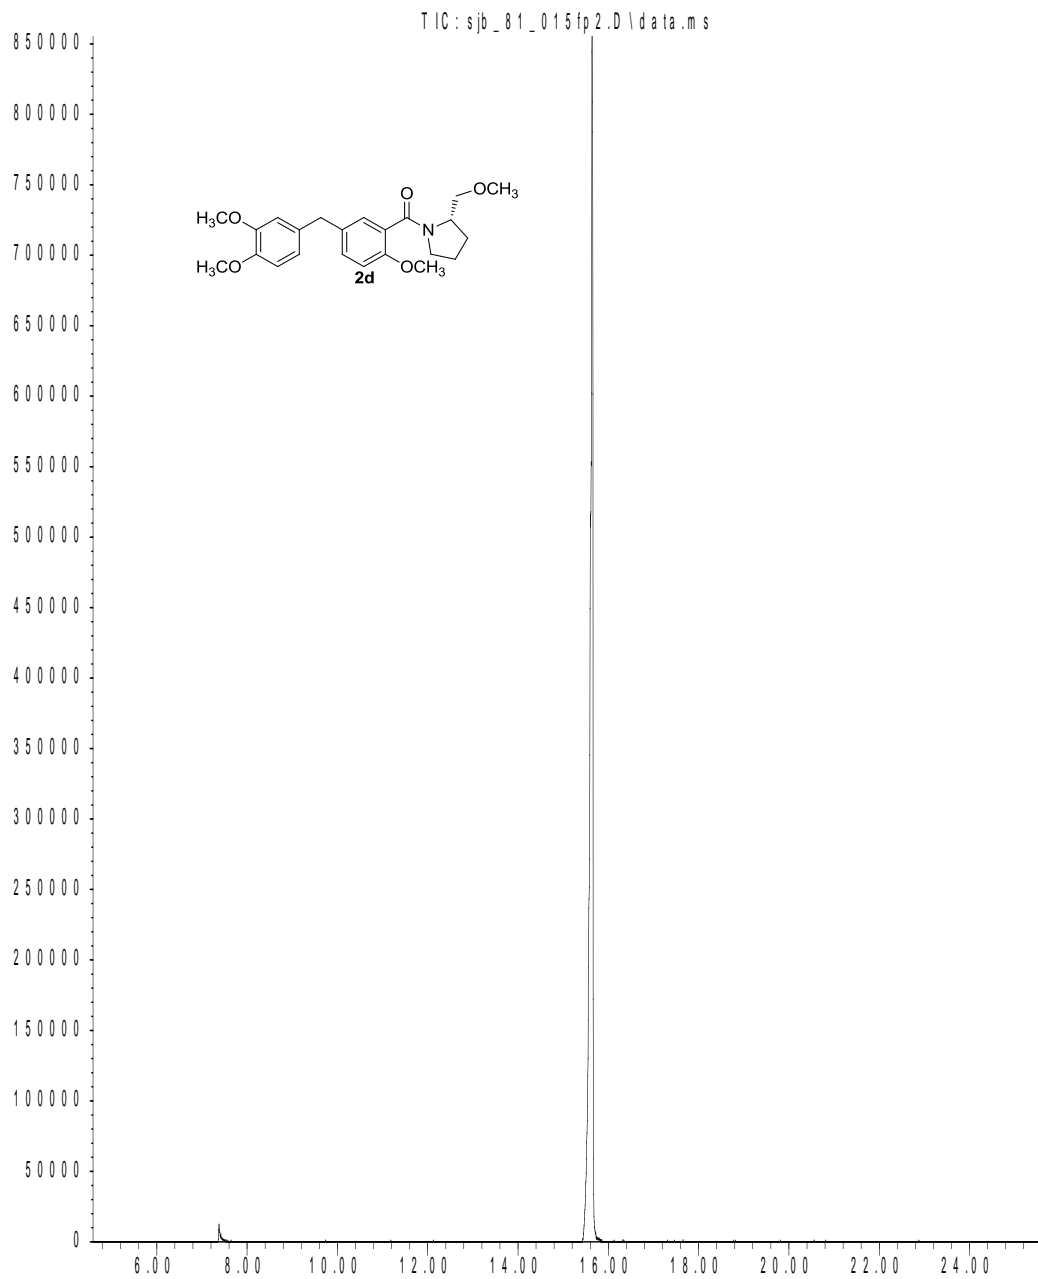

Time -->



Abundance

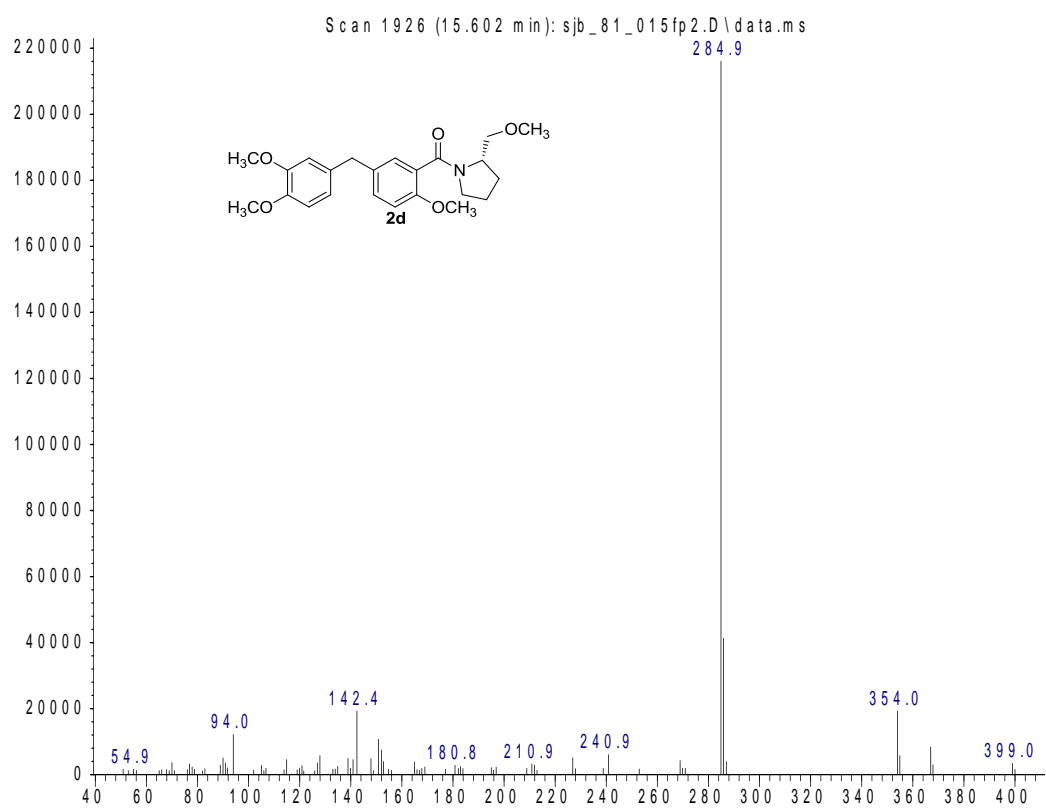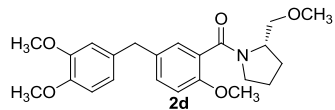

m/z-->

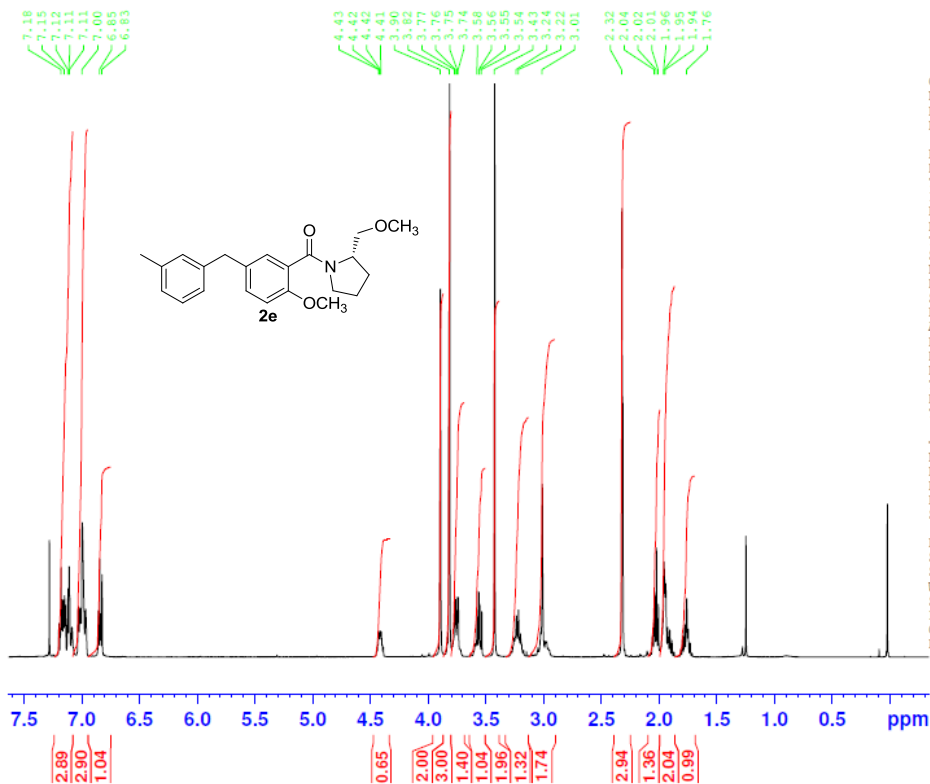

Current Data Parameters  
 NAME sjb\_77\_139fp2  
 EXPNO 1  
 PROCNO 1

F2 - Acquisition Parameters  
 Date\_ 20130716  
 Time 7.46  
 INSTRUM spect  
 PROBHD 5 mm PABBO BB-  
 PULPROG zg30  
 TD 65536  
 SOLVENT CDCl3  
 NS 16  
 DS 2  
 SWH 8223.685 Hz  
 FIDRES 0.125483 Hz  
 AQ 3.9845889 sec  
 RG 128  
 DW 60.800 usec  
 DE 6.50 usec  
 TE 301.2 K  
 D1 1.00000000 sec  
 TDO 1

CHANNEL f1  
 NUC1 1H  
 P1 12.50 usec  
 PL1 -2.00 dB  
 PL1W 12.14226913 W  
 SFO1 400.1524711 MHz

F2 - Processing parameters  
 SI 32768  
 SF 400.1500000 MHz  
 WDW EM  
 SSB 0  
 LB 0.30 Hz  
 GB 0  
 PC 1.00

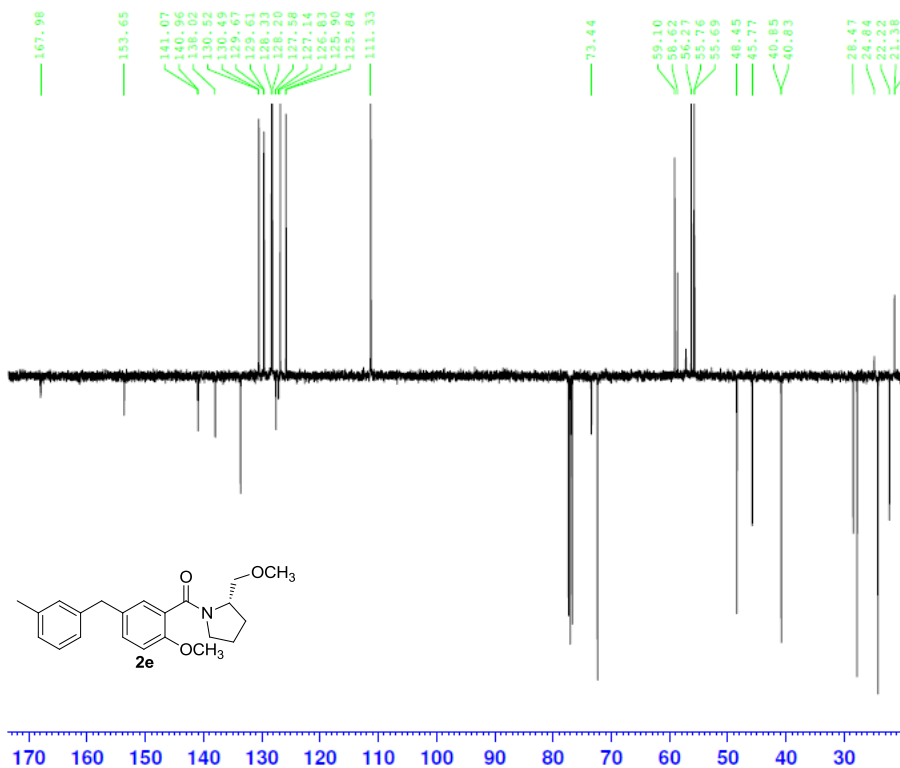

Current Data Parameters  
 NAME sjb\_77\_139fp AP13  
 EXPNO 1  
 PROCNO 1

F2 - Acquisition Parameters  
 Date\_ 20130716  
 Time 8.42  
 INSTRUM spect  
 PROBHD 5 mm PABBO BB-  
 PULPROG jmod  
 TD 65536  
 SOLVENT CDCl3  
 NS 775  
 DS 4  
 SWH 24038.461 Hz  
 FIDRES 0.366798 Hz  
 AQ 1.3631488 sec  
 RG 203  
 DW 20.800 usec  
 DE 6.50 usec  
 TE 301.2 K  
 CNST2 145.0000000  
 CNST11 1.0000000  
 D1 2.00000000 sec  
 D20 0.00689655 sec  
 TDO 1

CHANNEL f1  
 NUC1 13C  
 P1 8.00 usec  
 P2 16.00 usec  
 PL1 -2.00 dB  
 PL1W 56.13311005 W  
 SFO1 100.6278593 MHz

CHANNEL f2  
 CPDPRG2 waltz16  
 NUC2 1H  
 PCPD2 80.00 usec  
 PL2 -2.00 dB  
 PL12 14.00 dB  
 PL2W 12.14226913 W  
 PL12W 0.30500001 W  
 SFO2 400.1517609 MHz

F2 - Processing parameters  
 SI 32768  
 SF 100.6177980 MHz  
 WDW EM  
 SSB 0  
 LB 1.00 Hz  
 GB 0  
 PC 1.40

Area Percent Report

Data Path : C:\msdchem\1\DATA\  
Data File : sjb\_77\_139fp.D  
Acq On : 8 Jul 2013 9:53  
Operator : ep  
Sample : sjb\_77\_139fp  
Misc :  
ALS Vial : 90 Sample Multiplier: 1

Integration Parameters: autoint1.e  
Integrator: ChemStation

Method : C:\msdchem\1\5973N\PRECISION.M  
Title :

Signal : TIC: sjb\_77\_139fp.D\data.ms

| peak # | R.T. min | first scan | max scan | last scan | PK TY | peak height | corr. area | corr. % max. | % of total |
|--------|----------|------------|----------|-----------|-------|-------------|------------|--------------|------------|
| 1      | 7.929    | 561        | 585      | 599       | BV    | 28577       | 573288     | 0.06%        | 0.056%     |
| 2      | 8.475    | 675        | 680      | 704       | BV 3  | 44818       | 1476917    | 0.15%        | 0.144%     |
| 3      | 11.749   | 1236       | 1253     | 1264      | PV 4  | 20623       | 556794     | 0.06%        | 0.054%     |
| 4      | 12.282   | 1323       | 1346     | 1410      | PV 2  | 33061394    | 1005291419 | 100.00%      | 98.150%    |
| 5      | 12.662   | 1410       | 1412     | 1429      | VV 8  | 191146      | 9977408    | 0.99%        | 0.974%     |
| 6      | 12.770   | 1429       | 1431     | 1452      | VB 8  | 109101      | 6364368    | 0.63%        | 0.621%     |

Sum of corrected areas: 1024240193

Abundance

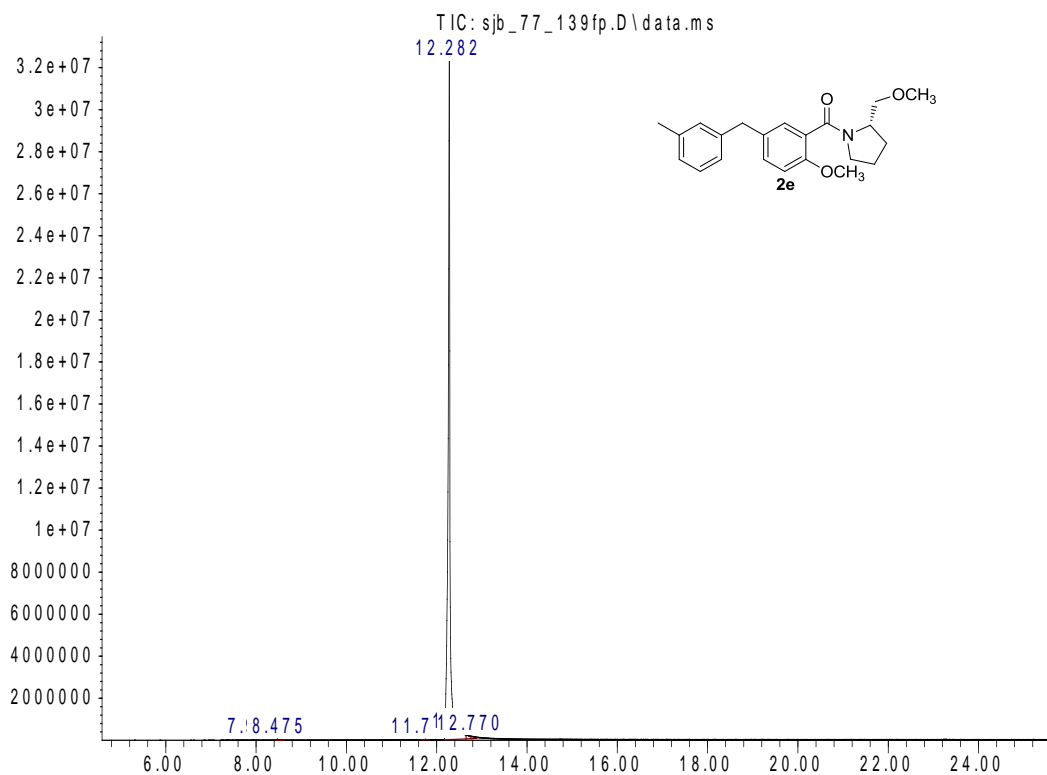

Time-->

Abundance

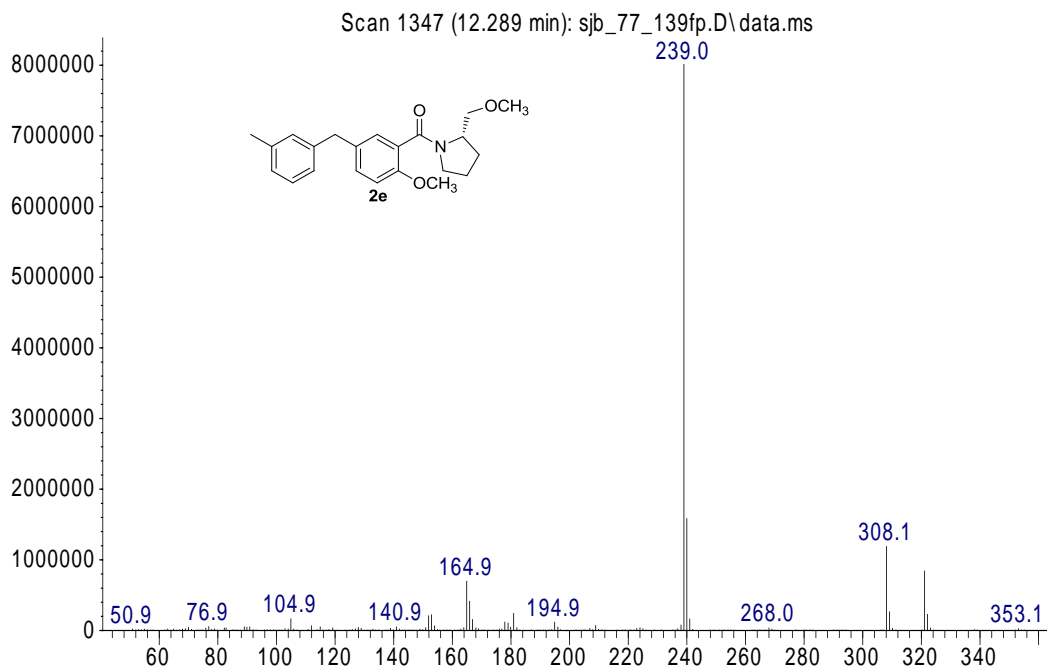

m/z-->

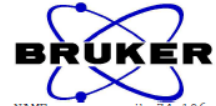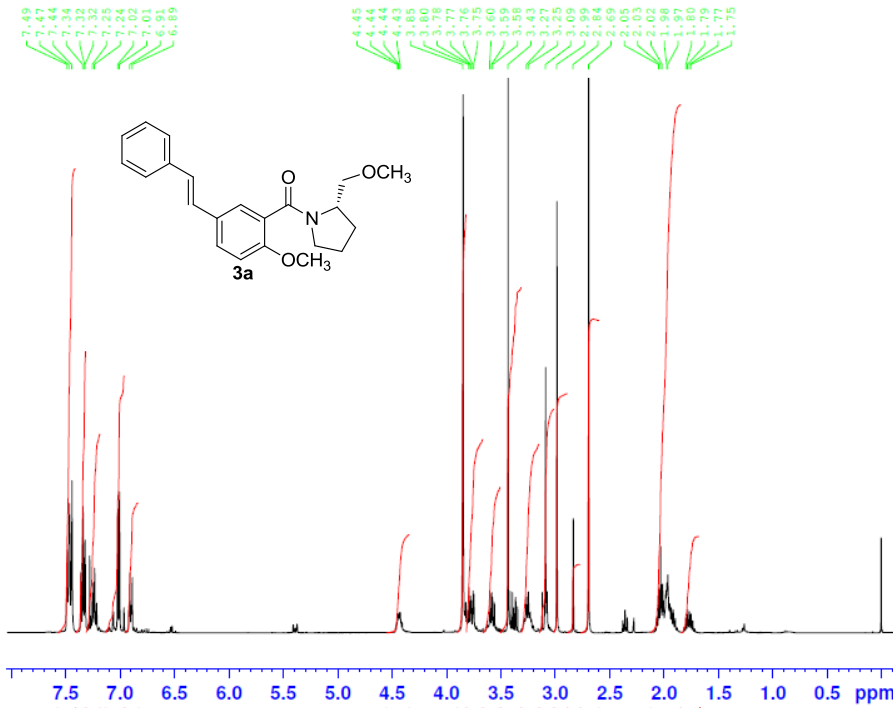

NAME sjb\_74\_196  
EXPNO 1  
PROCNO 1  
Date\_ 20130712  
Time 8.37  
INSTRUM spect  
PROBHD 5 mm PABBO BB-  
PULPROG zg30  
TD 65536  
SOLVENT CDCl3  
NS 16  
DS 2  
SWH 8223.685 Hz  
FIDRES 0.125483 Hz  
AQ 3.9846387 sec  
RG 50.8  
DW 60.800 usec  
DE 6.50 usec  
TE 301.2 K  
D1 1.00000000 sec  
TDO 1

----- CHANNEL f1 -----  
NUC1 1H  
P1 12.50 usec  
PL1 -2.00 dB  
PL1W 12.14226913 W  
SFO1 400.1524711 MHz  
SI 32768  
SF 400.1500000 MHz  
WDW EM  
SSB 0  
LB 0.30 Hz  
GB 0  
PC 1.00

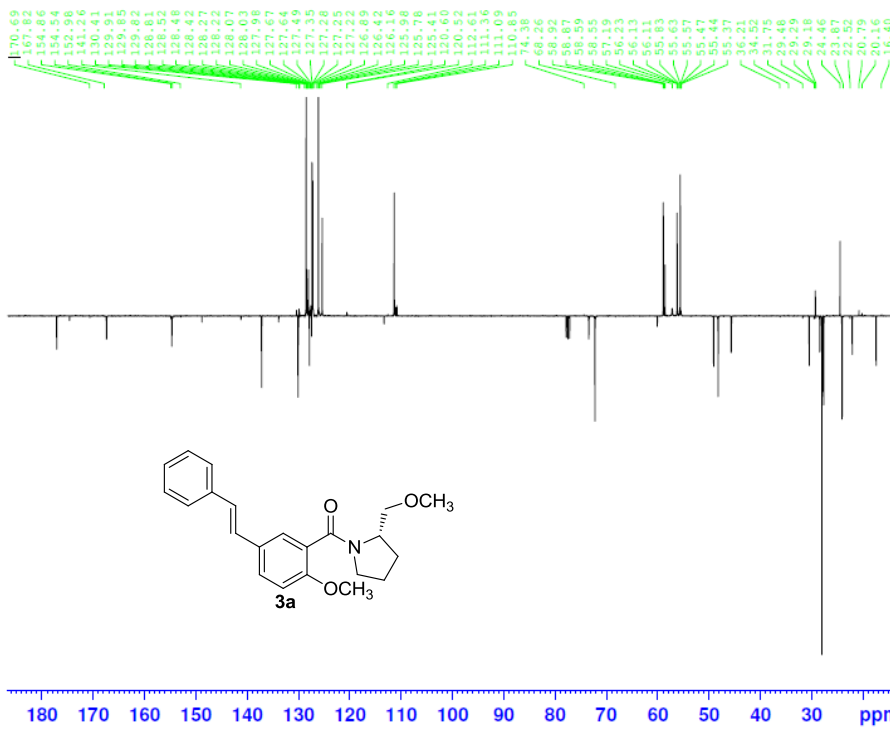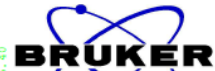

NAME sjb\_74\_196fpAPT  
EXPNO 1  
PROCNO 1  
Date\_ 20121107  
Time 10.01  
INSTRUM spect  
PROBHD 5 mm PABBO BB-  
PULPROG jmod  
TD 65536  
SOLVENT CDCl3  
NS 704  
DS 4  
SWH 17482.518 Hz  
FIDRES 0.266762 Hz  
AQ 1.8743796 sec  
RG 203  
DW 28.600 usec  
DE 6.50 usec  
TE 301.2 K  
CNST2 145.0000000  
CNST11 1.0000000  
D1 2.00000000 sec  
D20 0.00689655 sec  
TDO 1

----- CHANNEL f1 -----  
NUC1 13C  
P1 8.00 usec  
P2 16.00 usec  
PL1 -2.00 dB  
PL1W 56.13311005 W  
SFO1 100.6278332 MHz

----- CHANNEL f2 -----  
CPDPRG2 waltz16  
NUC2 1H  
PCPD2 80.00 usec  
PL2 -2.00 dB  
PL12 14.00 dB  
PL2W 12.14226913 W  
PL12W 0.30500001 W  
SFO2 400.1514494 MHz  
SI 32768  
SF 100.6177980 MHz  
WDW EM  
SSB 0  
LB 1.00 Hz  
GB 0  
PC 1.40

Area Percent Report

Data Path : C:\msdchem\1\DATA\  
Data File : sjb\_74\_196fp.D  
Acq On : 6 Nov 2012 17:26  
Operator : sjb  
Sample : sjb\_74\_196fp  
Misc :  
ALS Vial : 5 Sample Multiplier: 1

Integration Parameters: autoint1.e  
Integrator: ChemStation

Method : C:\msdchem\1\METHODS\JMB2.m  
Title :

Signal : TIC: sjb\_74\_196fp.D\data.ms

| peak # | R.T. min | first scan | max scan | last scan | PK TY | peak height | corr. area | corr. % max. | % of total |
|--------|----------|------------|----------|-----------|-------|-------------|------------|--------------|------------|
| 1      | 7.958    | 585        | 590      | 614       | BV    | 93249       | 2391488    | 0.67%        | 0.638%     |
| 2      | 12.347   | 1348       | 1357     | 1377      | BV 2  | 754583      | 16444164   | 4.62%        | 4.385%     |
| 3      | 15.286   | 1828       | 1871     | 1901      | BV    | 6269080     | 356146758  | 100.00%      | 94.977%    |

Sum of corrected areas: 374982409

JMB2.m Mon Nov 12 09:46:30 2012

Abundance

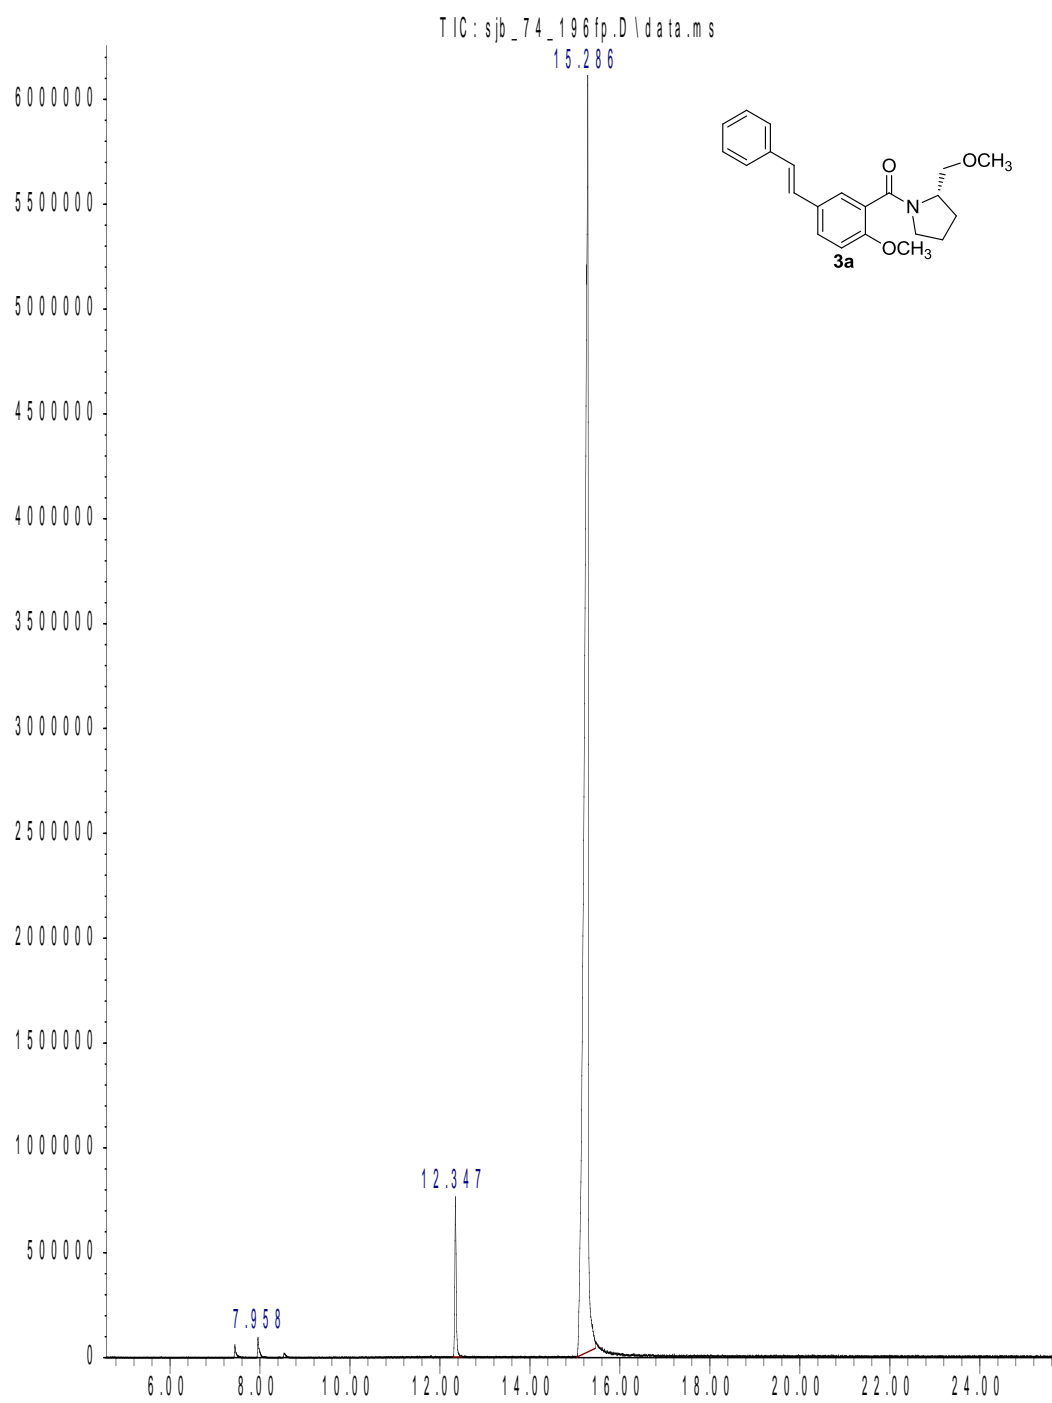

Abundance

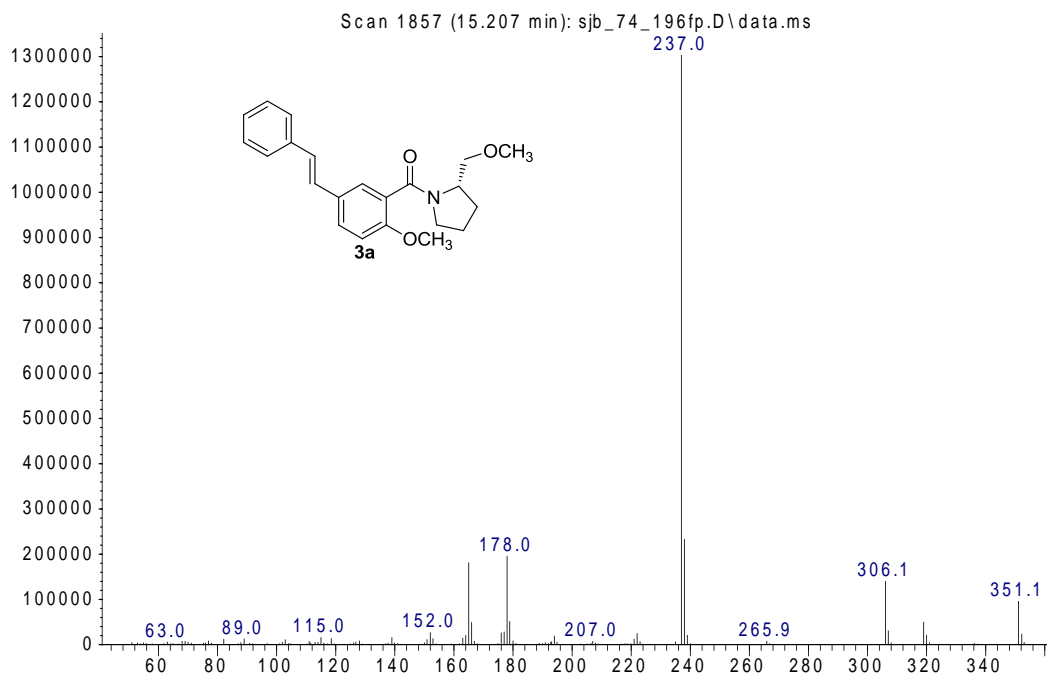

m/z-->  
Abundance

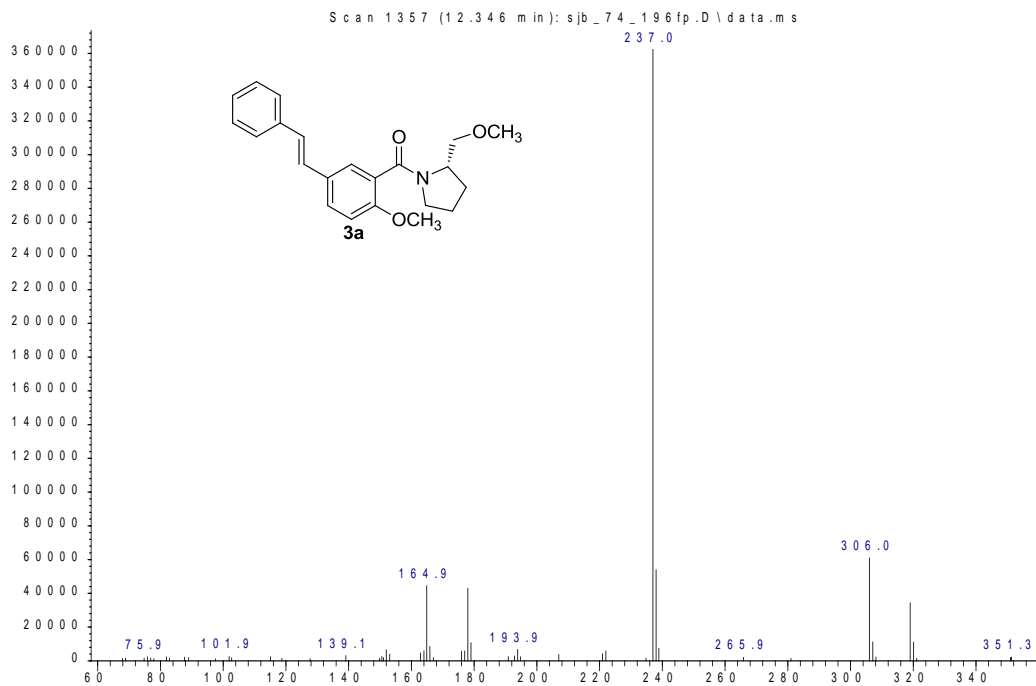

m/z-->



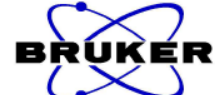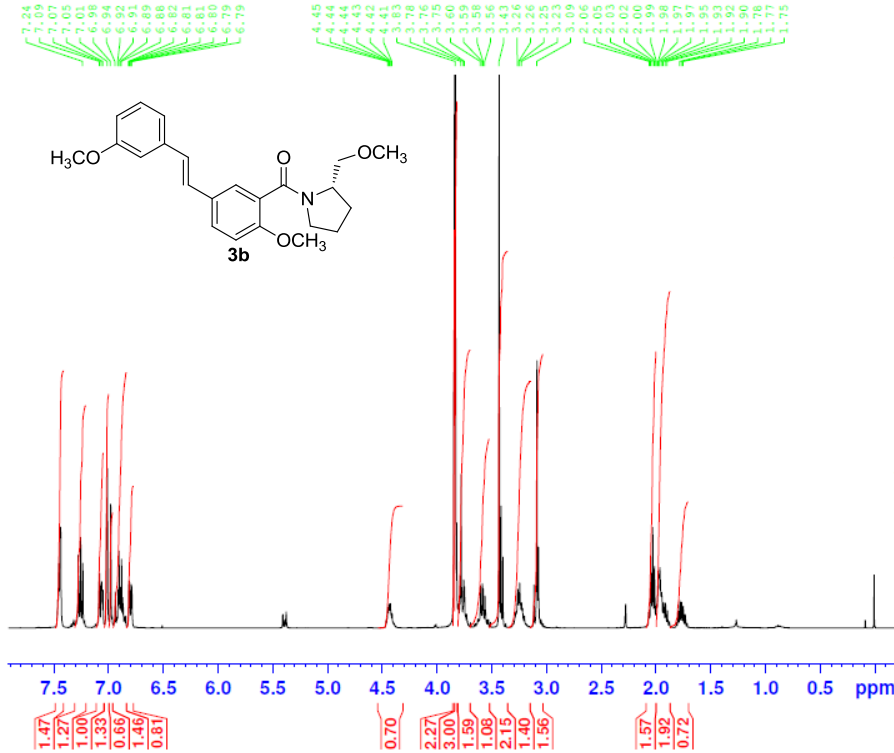

```
NAME sjb_77_149fp take 2
EXPNO 1
PROCNO 1
Date_ 20130718
Time 7.46
INSTRUM spect
PROBHD 5 mm PABBO BB-
PULPROG zg30
TD 65536
SOLVENT CDCl3
NS 16
DS 2
SWH 8223.685 Hz
FIDRES 0.125483 Hz
AQ 3.9846387 sec
RG 40.3
DW 60.800 usec
DE 6.50 usec
TE 301.2 K
D1 1.00000000 sec
TD0 1
```

```
----- CHANNEL f1 -----
NUC1 1H
P1 12.50 usec
PL1 -2.00 dB
PL1W 12.14226913 W
SFO1 400.1524711 MHz
SI 32768
SF 400.1500000 MHz
WDW EM
SSB 0
LB 0.30 Hz
GB 0
PC 1.00
```

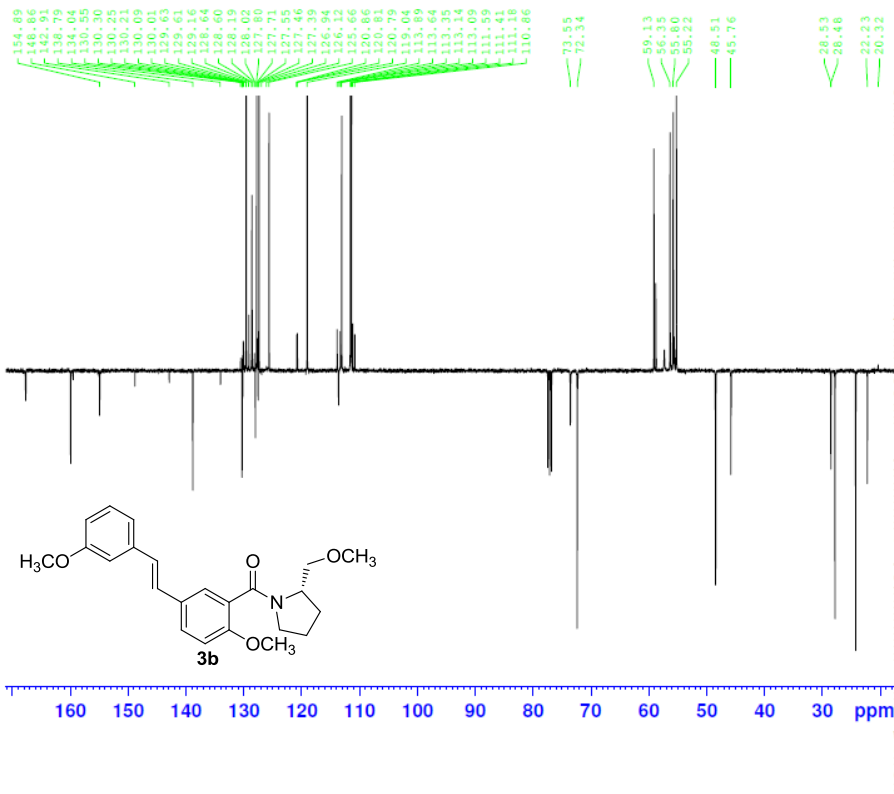

```
Current Data Parameters
NAME sjb_77_149fp APT
EXPNO 1
PROCNO 1
```

```
F2 - Acquisition Parameters
Date_ 20130718
Time 8.47
INSTRUM spect
PROBHD 5 mm PABBO BB-
PULPROG jmod
TD 65536
SOLVENT CDCl3
NS 987
DS 4
SWH 24038.461 Hz
FIDRES 0.366798 Hz
AQ 1.3631488 sec
RG 203
DW 20.800 usec
DE 6.50 usec
TE 301.2 K
CNST2 145.0000000
CNST11 1.0000000
D1 2.00000000 sec
D20 0.00689655 sec
TD0 1
```

```
----- CHANNEL f1 -----
NUC1 13C
P1 8.00 usec
P2 16.00 usec
PL1 -2.00 dB
PL1W 56.13311005 W
SFO1 100.6278593 MHz
```

```
----- CHANNEL f2 -----
CPDPRG2 waltz16
NUC2 1H
PCPD2 80.00 usec
PL2 -2.00 dB
PL12 14.00 dB
PL2W 12.14226913 W
PL12W 0.30500001 W
SFO2 400.1515527 MHz
```

```
F2 - Processing parameters
SI 32768
SF 100.6177980 MHz
WDW EM
SSB 0
LB 1.00 Hz
GB 0
PC 1.40
```

Area Percent Report

Data Path : C:\msdchem\1\DATA\  
Data File : sjb\_74\_028fp.D  
Acq On : 12 Jun 2012 15:29  
Operator : sjb  
Sample : sjb\_74\_028fp  
Misc :  
ALS Vial : 35 Sample Multiplier: 1

Integration Parameters: autoint1.e  
Integrator: ChemStation

Method : C:\msdchem\1\METHODS\JMB2.m  
Title :

Signal : TIC: sjb\_74\_028fp.D\data.ms

| peak # | R.T. min | first scan | max scan | last scan | PK TY | peak height | corr. area | corr. % max. | % of total |
|--------|----------|------------|----------|-----------|-------|-------------|------------|--------------|------------|
| 1      | 7.428    | 492        | 498      | 537       | BV    | 394397      | 9499465    | 0.92%        | 0.856%     |
| 2      | 7.947    | 582        | 588      | 604       | BV    | 244367      | 4966452    | 0.48%        | 0.447%     |
| 3      | 8.506    | 678        | 686      | 715       | PV    | 133193      | 4366147    | 0.42%        | 0.393%     |
| 4      | 13.998   | 1627       | 1646     | 1657      | PV 2  | 34621       | 1132361    | 0.11%        | 0.102%     |
| 5      | 14.301   | 1680       | 1699     | 1726      | PV    | 1718437     | 52484842   | 5.09%        | 4.727%     |
| 6      | 19.994   | 2598       | 2694     | 2749      | PV    | 8203405     | 1030243382 | 100.00%      | 92.793%    |
| 7      | 20.316   | 2749       | 2750     | 2779      | VV 6  | 124068      | 7195565    | 0.70%        | 0.648%     |
| 8      | 20.491   | 2779       | 2781     | 2788      | VV 8  | 22518       | 375776     | 0.04%        | 0.034%     |

Sum of corrected areas: 1110263990

JMB2.m Wed Oct 17 15:12:44 2012

Abundance

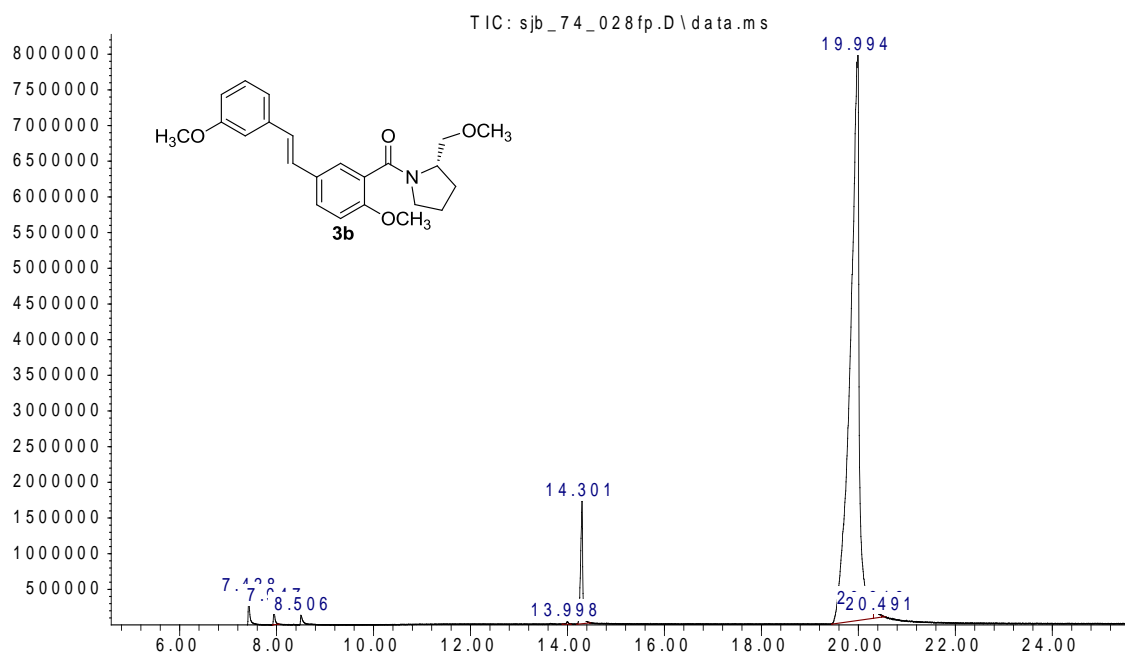

Time-->

Abundance

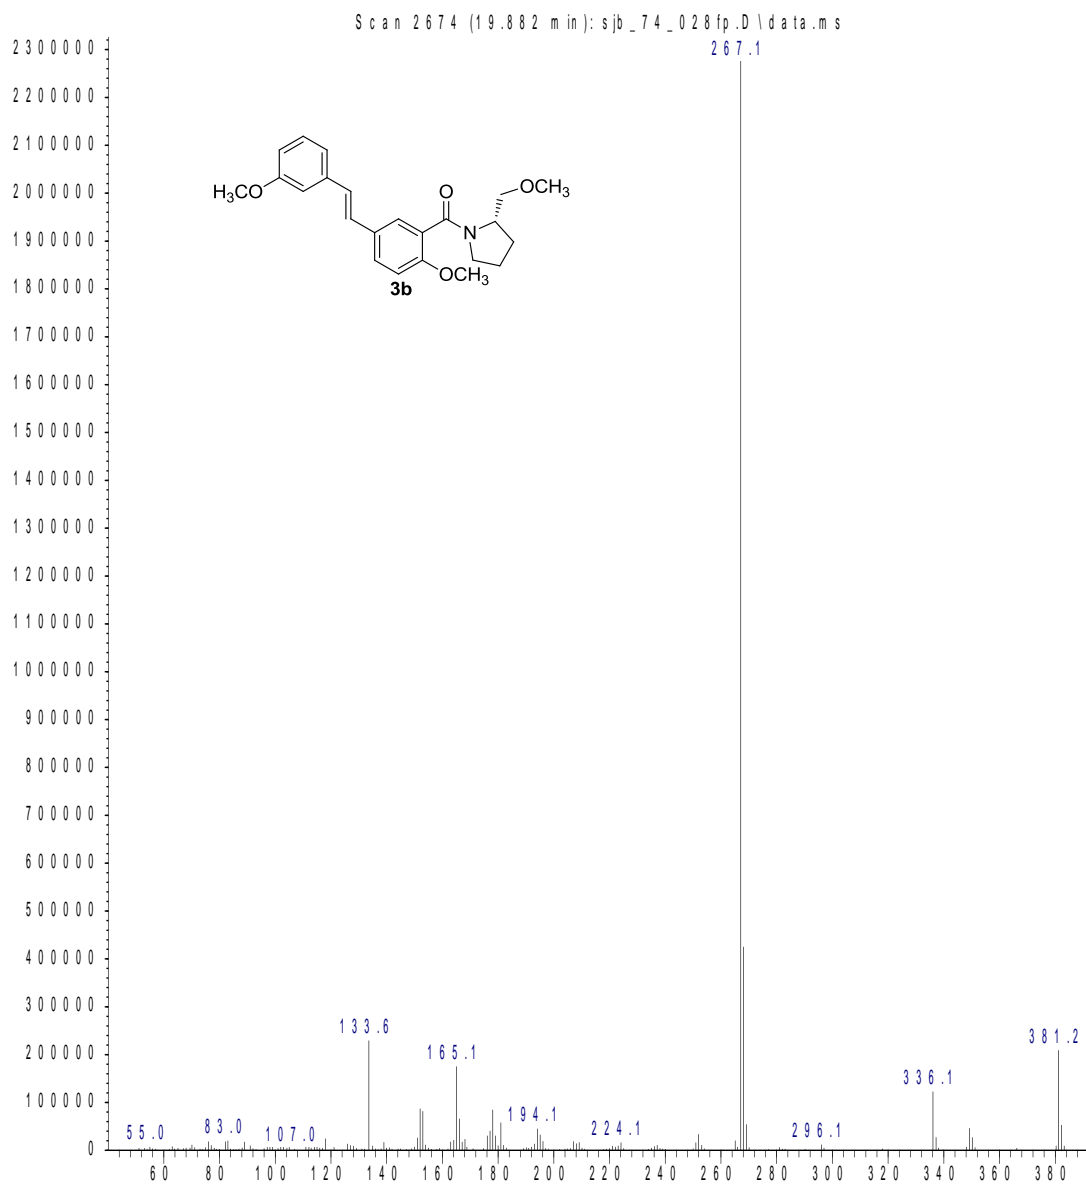

m/z-->

Abundance

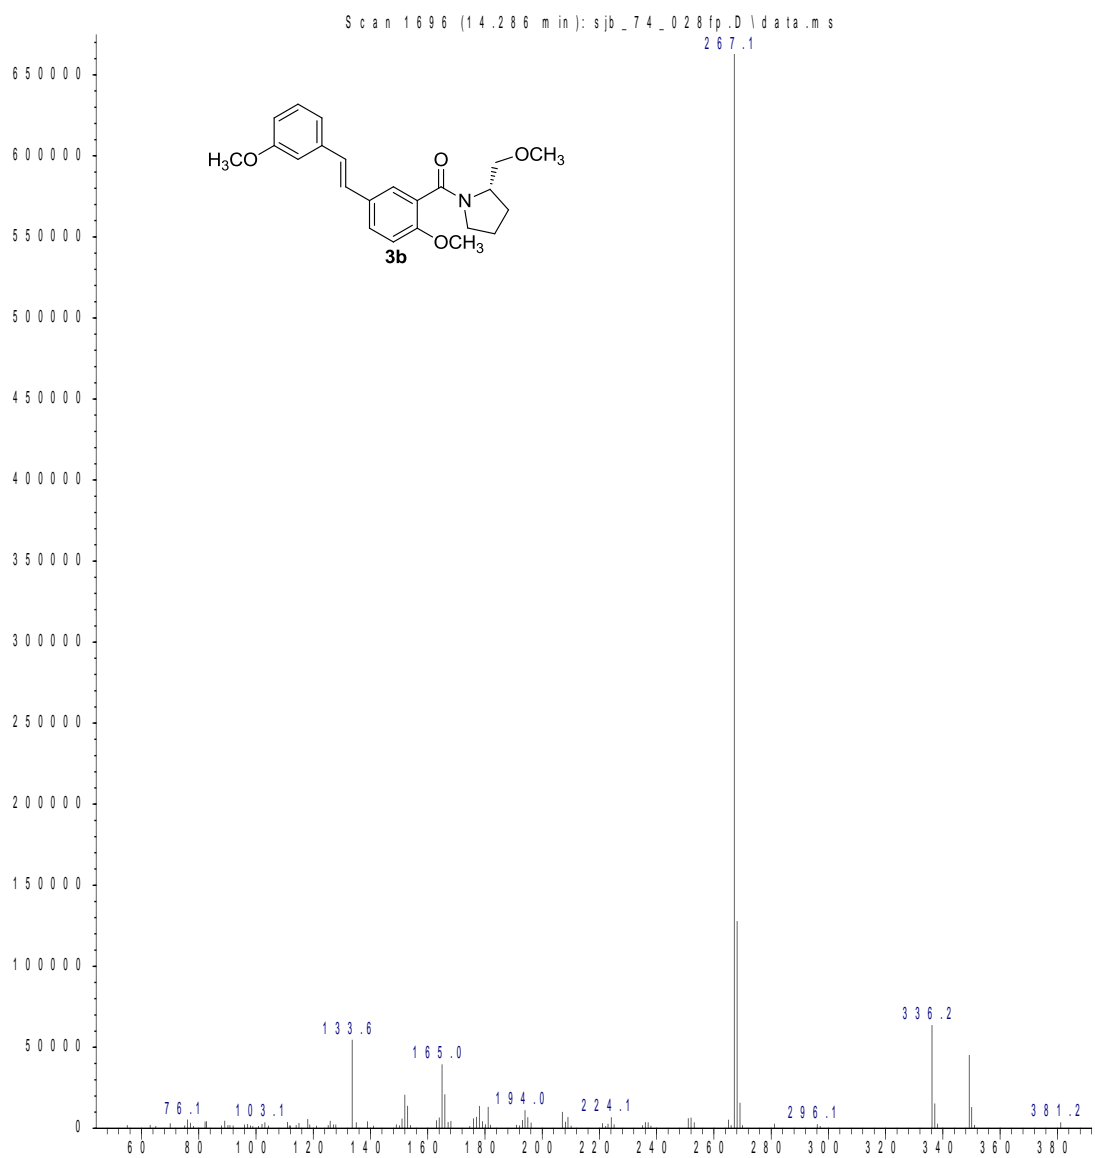

m/z-->



Area Percent Report

Data Path : C:\msdchem\1\DATA\  
Data File : ra\_67\_145a.D  
Acq On : 16 Jul 2012 10:21  
Operator : sm  
Sample : ra\_67\_145a  
Misc : Heck cross-coupling 5g scale  
ALS Vial : 90 Sample Multiplier: 1

Integration Parameters: autoint1.e  
Integrator: ChemStation

Method : C:\msdchem\1\METHODS\JMB2.m  
Title :

Signal : TIC: ra\_67\_145a.D\data.ms

| peak # | R.T. min | first scan | max scan | last scan | PK TY | peak height | corr. area | corr. % max. | % of total |
|--------|----------|------------|----------|-----------|-------|-------------|------------|--------------|------------|
| 1      | 7.436    | 493        | 499      | 531       | BB    | 68422       | 1923647    | 0.52%        | 0.483%     |
| 2      | 7.951    | 583        | 589      | 625       | BB    | 92384       | 2825997    | 0.76%        | 0.710%     |
| 3      | 14.893   | 1783       | 1802     | 1846      | PB    | 630106      | 23380433   | 6.32%        | 5.873%     |
| 4      | 20.685   | 2710       | 2814     | 2910      | PV    | 3375196     | 369957456  | 100.00%      | 92.923%    |
| 5      | 21.251   | 2910       | 2913     | 2916      | VV 3  | 4131        | 44728      | 0.01%        | 0.011%     |

Sum of corrected areas: 398132262

JMB2.m Thu Nov 08 13:39:54 2012

Abundance

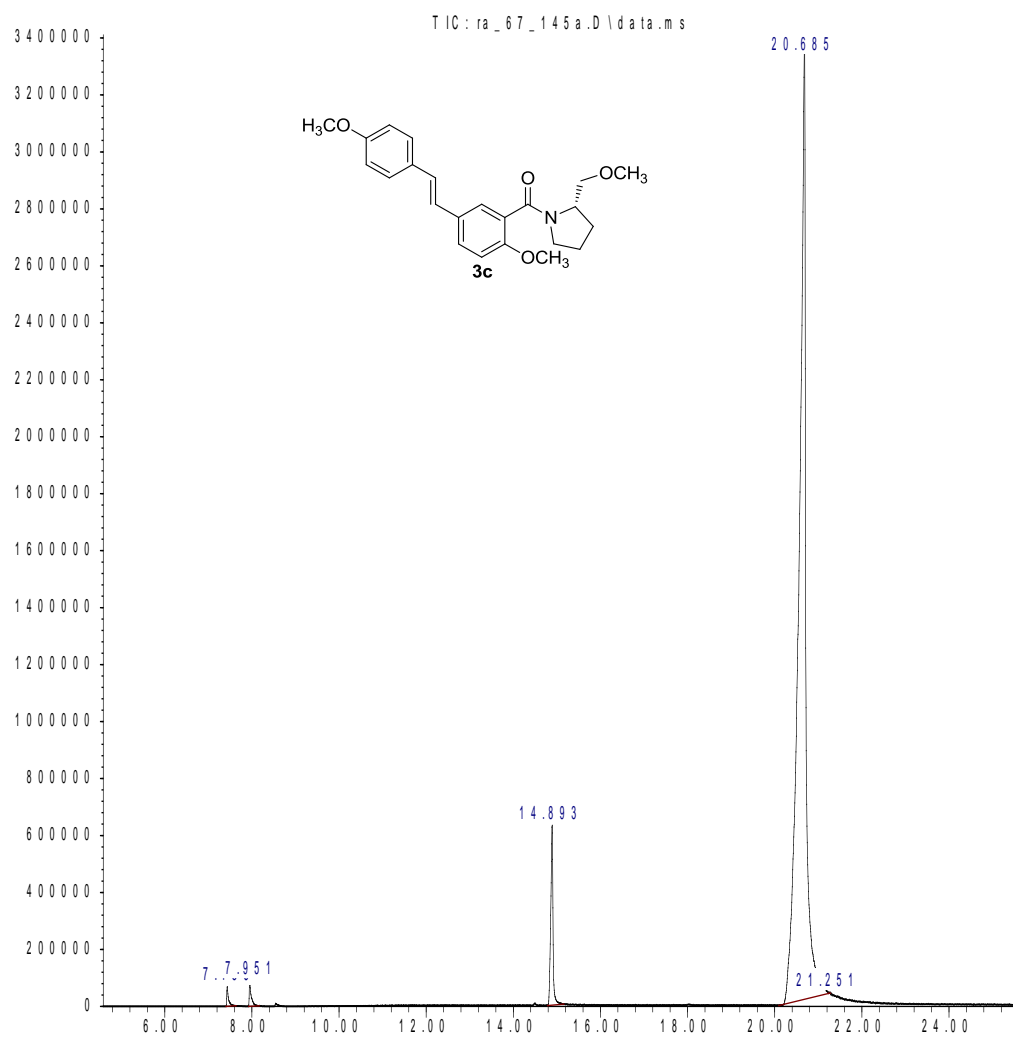

Time-->



Abundance

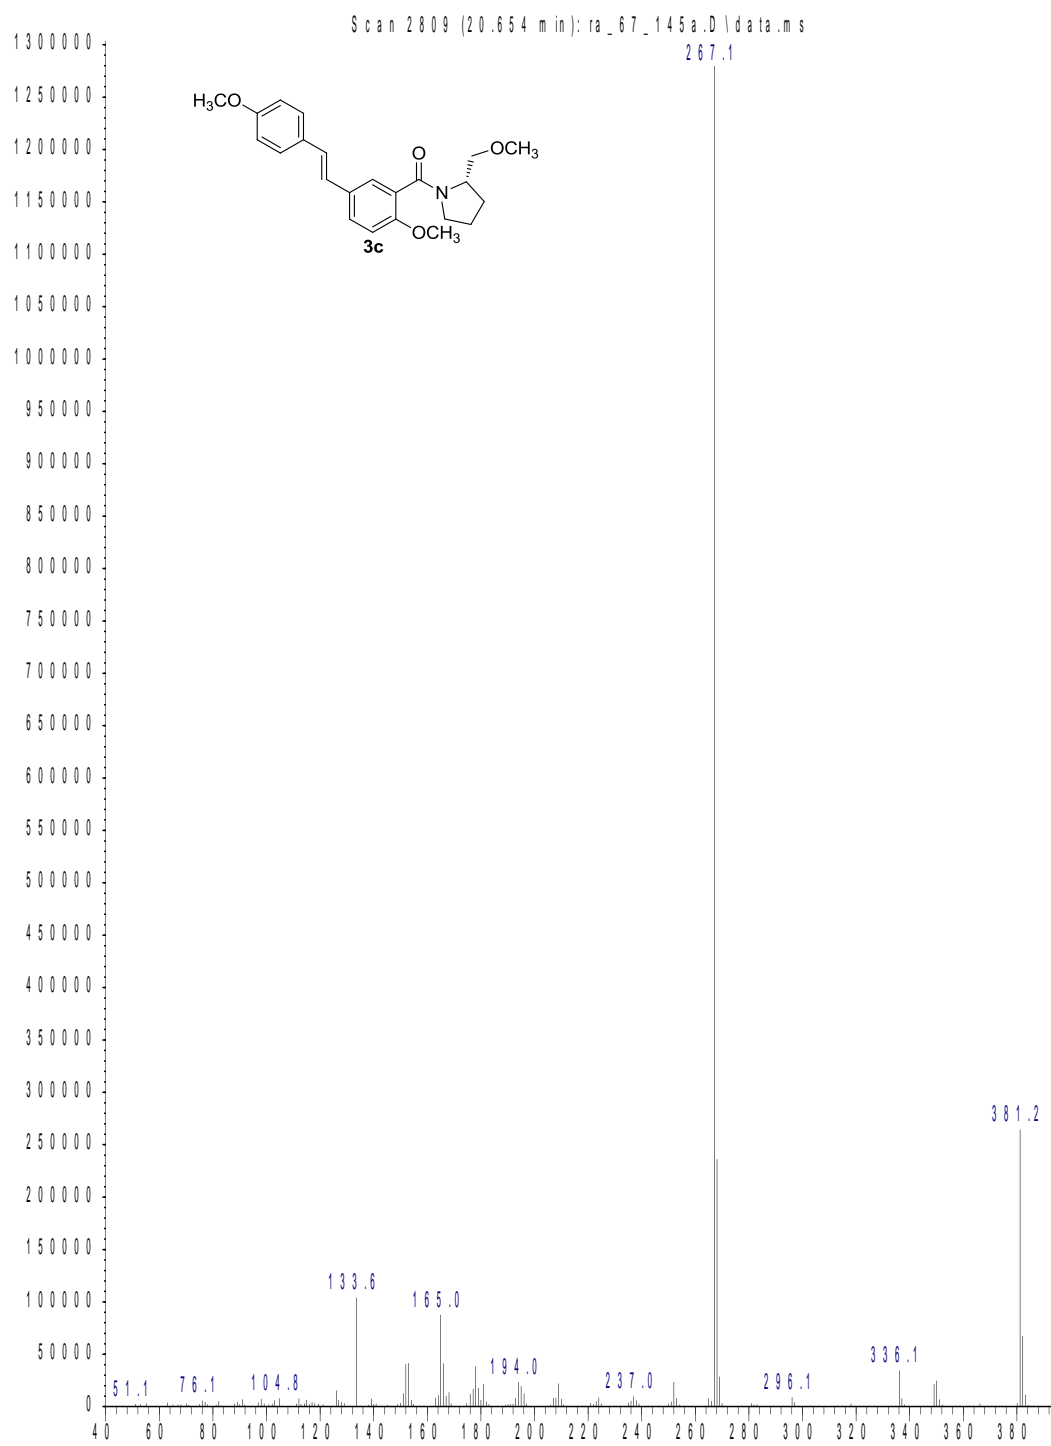

m/z-->

Abundance

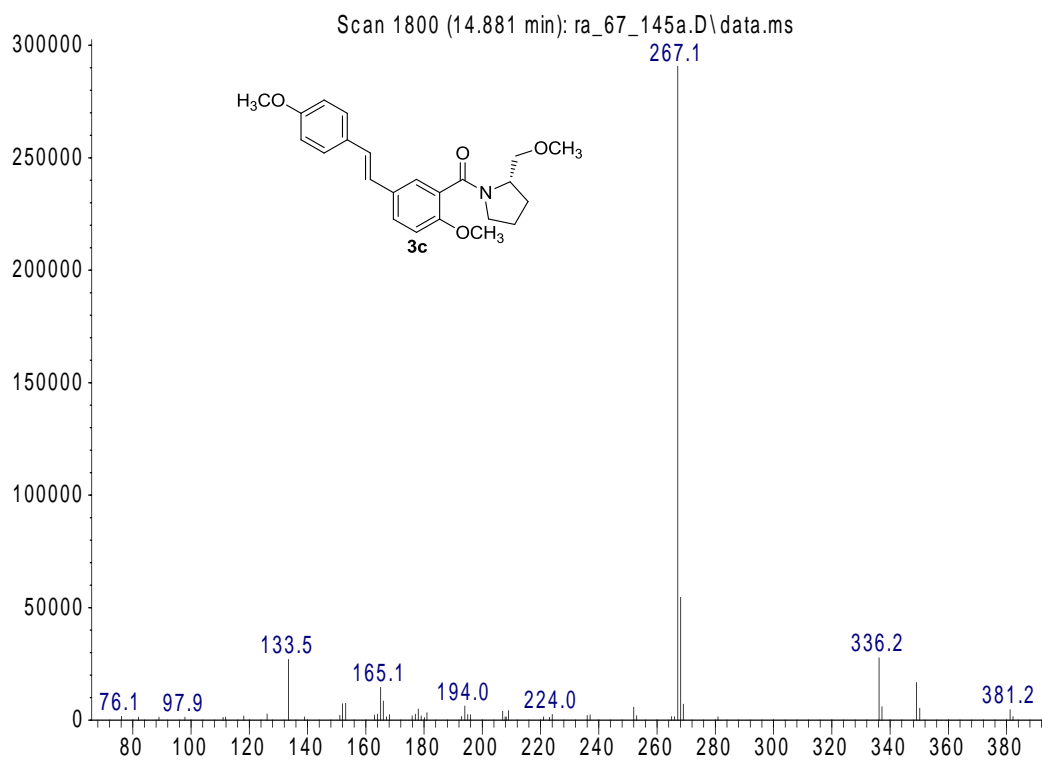

m/z-->

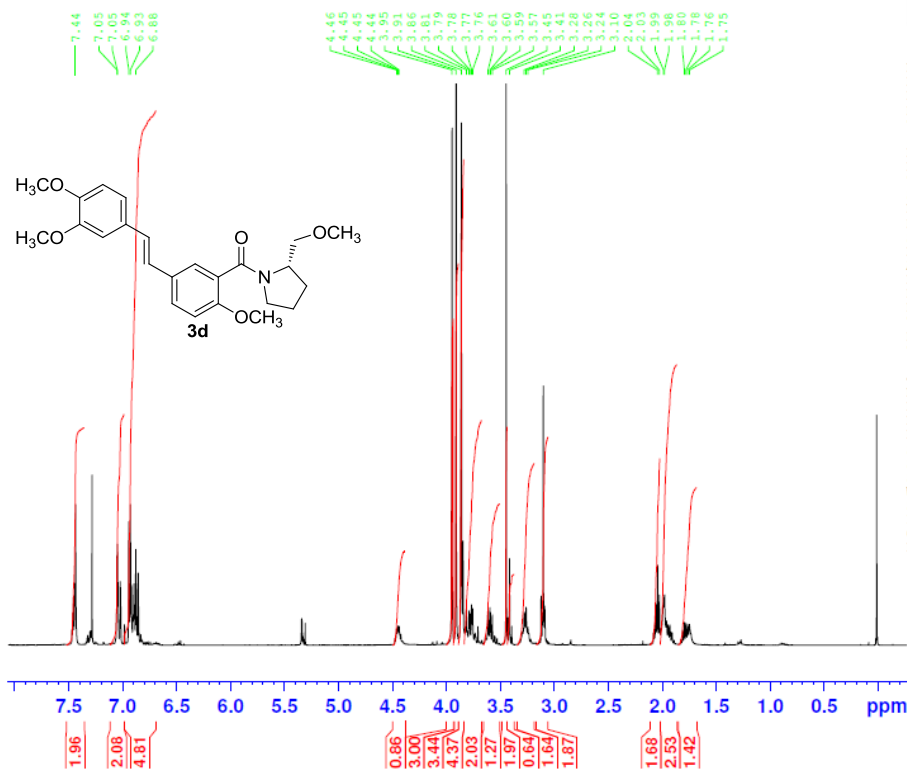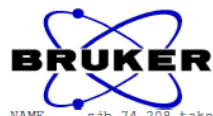

```

NAME      sjb_74_208 take 2
EXPNO    1
PROCNO   1
Date_    20130711
Time     8.57
INSTRUM  spect
PROBHD   5 mm PABBO BB-
PULPROG  zg30
TD       65536
SOLVENT  CDCl3
NS       16
DS       2
SWH      8223.685 Hz
FIDRES   0.125483 Hz
AQ       3.9846387 sec
RG       144
DW       60.800 usec
DE       6.50 usec
TE       301.2 K
D1       1.00000000 sec
TDO      1

----- CHANNEL f1 -----
NUC1     1H
P1       12.50 usec
PL1      -2.00 dB
PL1W     12.14226913 W
SFO1     400.1524711 MHz
SI       32768
SF       400.1500000 MHz
WDW      EM
SSB      0
LB       0.30 Hz
GB       0
PC       1.00
  
```

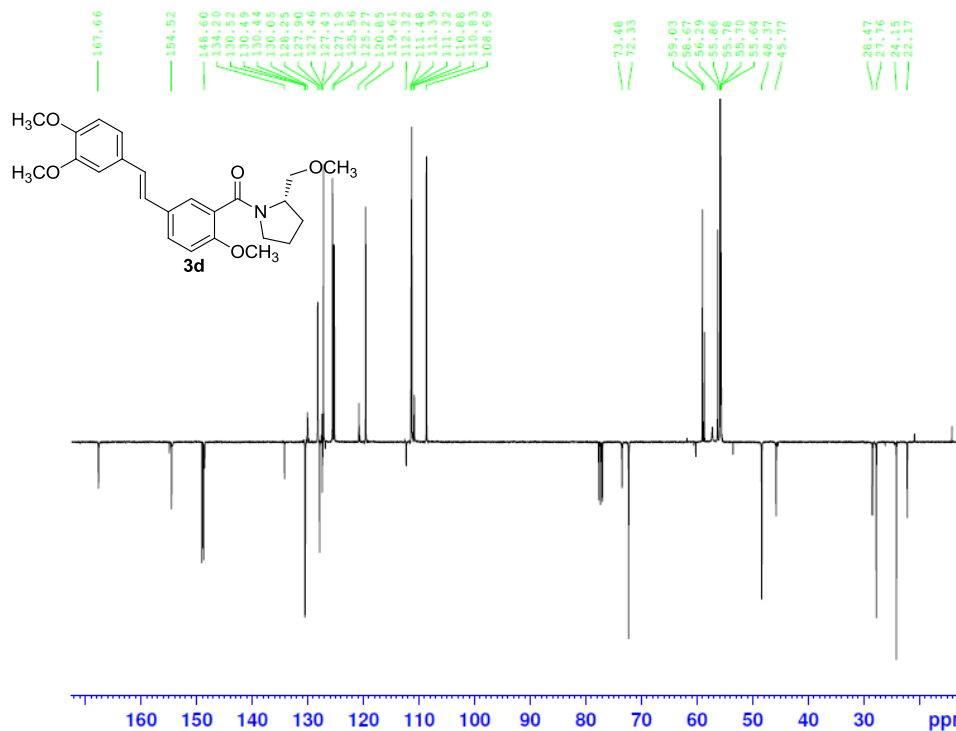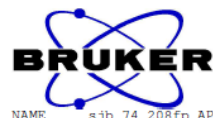

```

NAME      sjb_74_208fp APT
EXPNO    1
PROCNO   1
Date_    20121116
Time     15.52
INSTRUM  spect
PROBHD   5 mm PABBO BB-
PULPROG  jmod
TD       65536
SOLVENT  CDCl3
NS       1024
DS       4
SWH      16233.767 Hz
FIDRES   0.247708 Hz
AQ       2.0185587 sec
RG       203
DW       30.800 usec
DE       6.50 usec
TE       301.2 K
CNST2    145.0000000
CNST11   1.0000000
D1       2.00000000 sec
D20      0.00689655 sec
TDO      1

----- CHANNEL f1 -----
NUC1     13C
P1       8.00 usec
P2       16.00 usec
PL1      -2.00 dB
PL1W     56.13311005 W
SFO1     100.6270320 MHz

----- CHANNEL f2 -----
CPDPRG2  waltz16
NUC2     1H
PCPD2    80.00 usec
PL2      -2.00 dB
PL12     14.00 dB
PL2W     12.14226913 W
PL12W    0.30500001 W
SFO2     400.1515194 MHz
SI       32768
SF       100.6177980 MHz
WDW      EM
SSB      0
LB       1.00 Hz
GB       0
PC       1.40
  
```

Area Percent Report

Data Path : C:\msdchem\1\DATA\  
Data File : sjb\_77\_169fp.D  
Acq On : 7 Aug 2013 10:34  
Operator : sjb  
Sample : sjb\_77\_169fp  
Misc :  
ALS Vial : 85 Sample Multiplier: 1

Integration Parameters: autoint1.e  
Integrator: ChemStation

Method : C:\msdchem\1\5973N\PRECISION.M  
Title :

Signal : TIC: sjb\_77\_169fp.D\data.ms

| peak # | R.T. min | first scan | max scan | last scan | PK TY | peak height | corr. area | corr. % max. | % of total |
|--------|----------|------------|----------|-----------|-------|-------------|------------|--------------|------------|
| 1      | 7.377    | 483        | 489      | 520       | BB    | 282995      | 8369318    | 3.14%        | 2.755%     |
| 2      | 16.656   | 2082       | 2110     | 2130      | PV    | 744590      | 29079588   | 10.92%       | 9.574%     |
| 3      | 25.844   | 3611       | 3716     | 3752      | BV 3  | 1917900     | 266290676  | 100.00%      | 87.671%    |

Sum of corrected areas: 303739582

Abundance

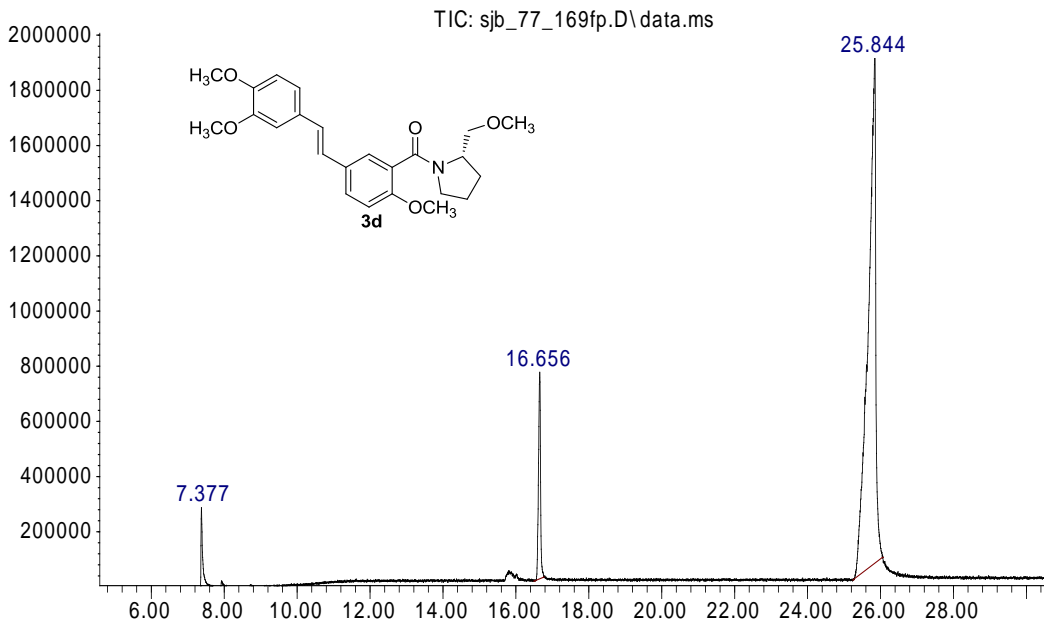

Time-->

Abundance

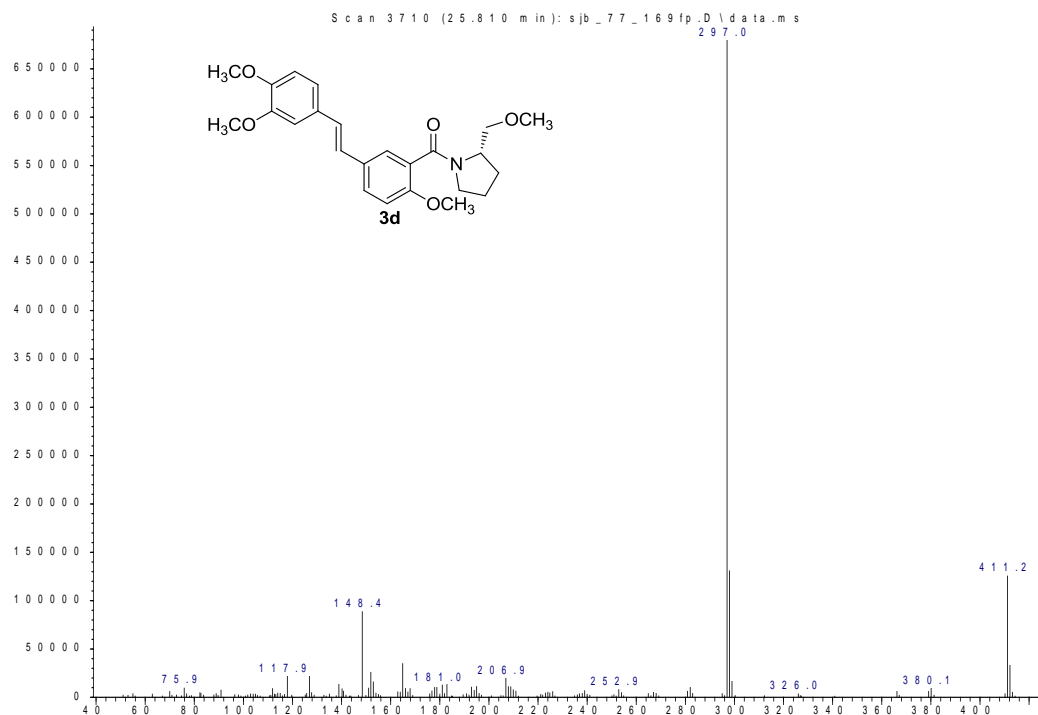

m/z-->

Abundance

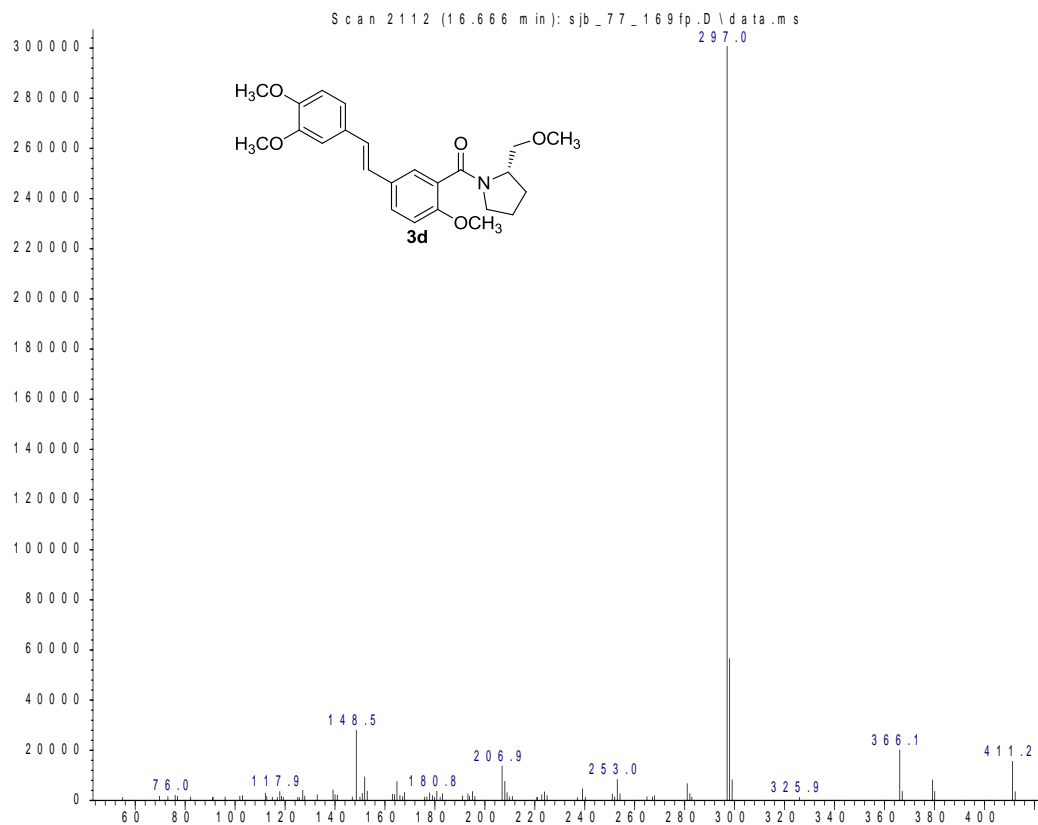

m/z-->

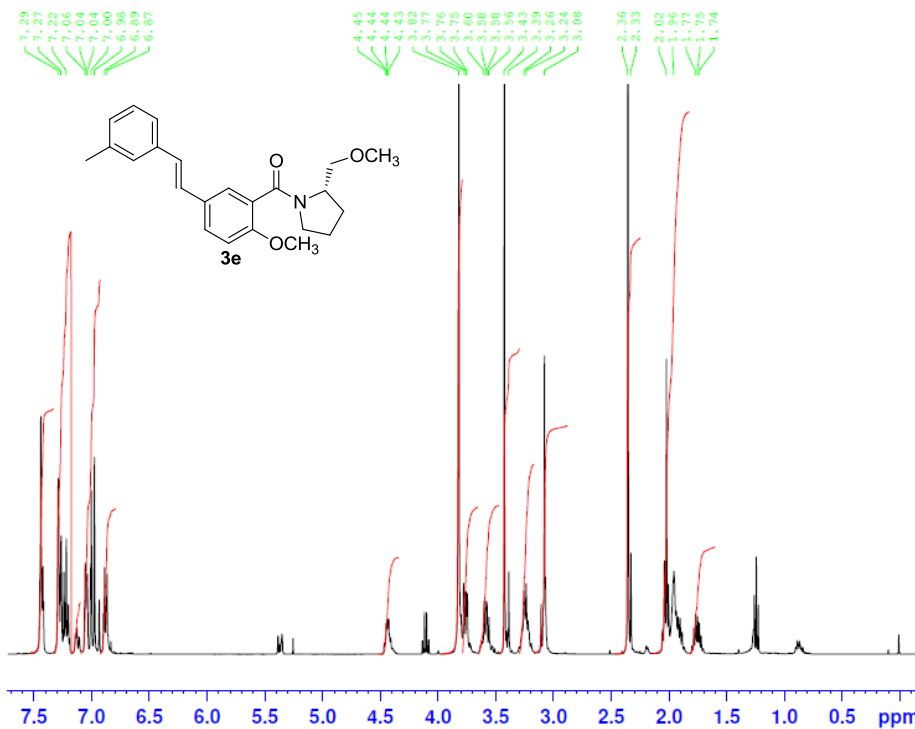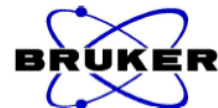

```

NAME      sjb_77_019fp
EXPNO     1
PROCNO    1
Date_     20121219
Time      13.56
INSTRUM   spect
PROBHD    5 mm PABBO BB-
PULPROG   zg30
TD         65536
SOLVENT   CDCl3
NS         16
DS         2
SWH        8223.685 Hz
FIDRES    0.125483 Hz
AQ         3.9846387 sec
RG         25.4
DW         60.800 usec
DE         6.50 usec
TE         299.4 K
D1         1.00000000 sec
D10        1
TDO        1
  
```

```

===== CHANNEL f1 =====
NUC1      1H
P1        12.50 usec
PL1       -2.00 dB
PL1W      12.14226913 W
SFO1      400.1524711 MHz
SI         32768
SF         400.1500000 MHz
WDW        EM
SSB        0
LB         0.30 Hz
GB         0
PC         1.00
  
```

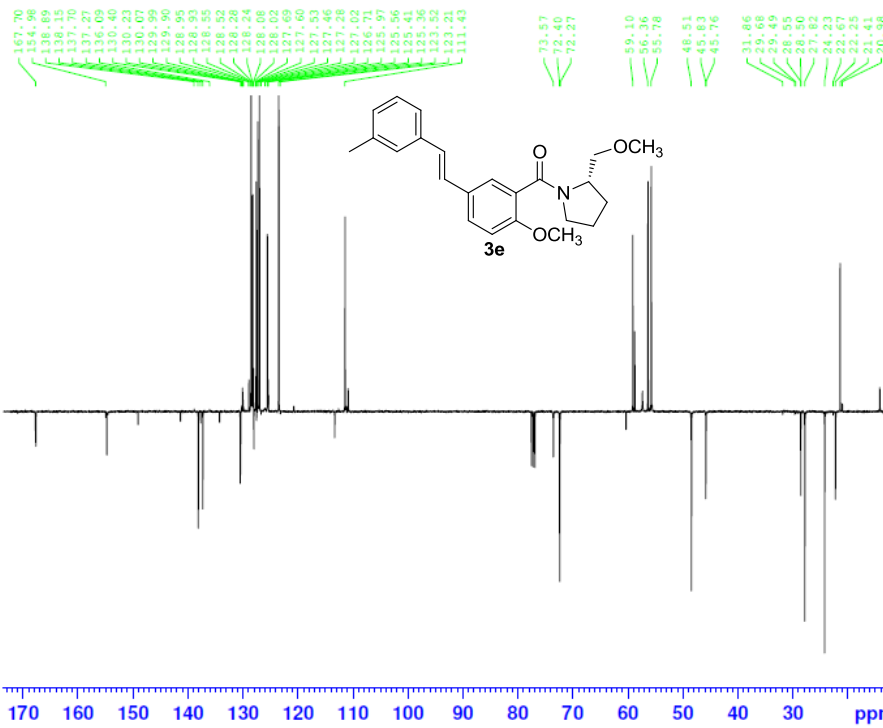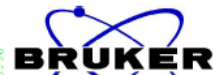

```

NAME      sjb_77_019fp APT
EXPNO     1
PROCNO    1
Date_     20121219
Time      15.44
INSTRUM   spect
PROBHD    5 mm PABBO BB-
PULPROG   jmod
TD         65536
SOLVENT   CDCl3
NS         1024
DS         4
SWH        16304.348 Hz
FIDRES    0.248785 Hz
AQ         2.0098207 sec
RG         203
DW         30.667 usec
DE         6.50 usec
TE         305.2 K
CNST2     145.0000000
CNST11    1.0000000
D1         2.00000000 sec
D20        0.00689655 sec
TDO        1
  
```

```

----- CHANNEL f1 -----
NUC1      13C
P1         8.00 usec
P2        16.00 usec
PL1       -2.00 dB
PL1W      56.13311005 W
SFO1      100.6271040 MHz
  
```

```

----- CHANNEL f2 -----
CPDPRG2   waltz16
NUC2      1H
PCPD2     80.00 usec
PL2       -2.00 dB
PL12      14.00 dB
PL2W      12.14226913 W
PL12W     0.30500001 W
SFO2      400.1515120 MHz
SI         32768
SF         100.6177980 MHz
WDW        EM
SSB        0
LB         1.00 Hz
GB         0
PC         1.40
  
```

Area Percent Report

Data Path : C:\msdchem\1\DATA\  
Data File : sjb\_77\_019fp.D  
Acq On : 19 Dec 2012 16:13  
Operator : sjb  
Sample : sjb\_77\_019fp  
Misc :  
ALS Vial : 5 Sample Multiplier: 1

Integration Parameters: autoint1.e  
Integrator: ChemStation

Method : C:\msdchem\1\5973N\PRECISION.M  
Title :

Signal : TIC: sjb\_77\_019fp.D\data.ms

| peak # | R.T. min | first scan | max scan | last scan | PK TY | peak height | corr. area | corr. % max. | % of total |
|--------|----------|------------|----------|-----------|-------|-------------|------------|--------------|------------|
| 1      | 12.894   | 1430       | 1453     | 1474      | PV    | 1521351     | 34495405   | 6.14%        | 5.785%     |
| 2      | 16.835   | 2080       | 2142     | 2189      | BV 2  | 6749209     | 561756588  | 100.00%      | 94.215%    |

Abundance

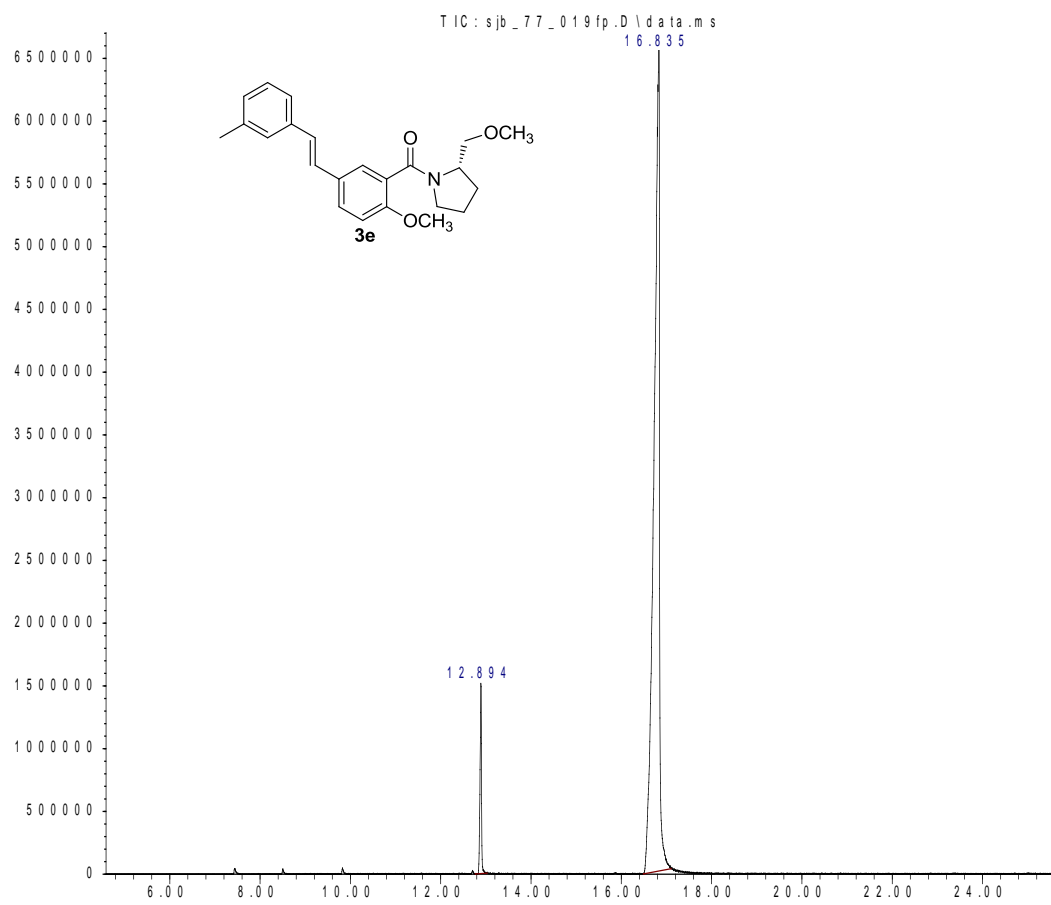



Abundance

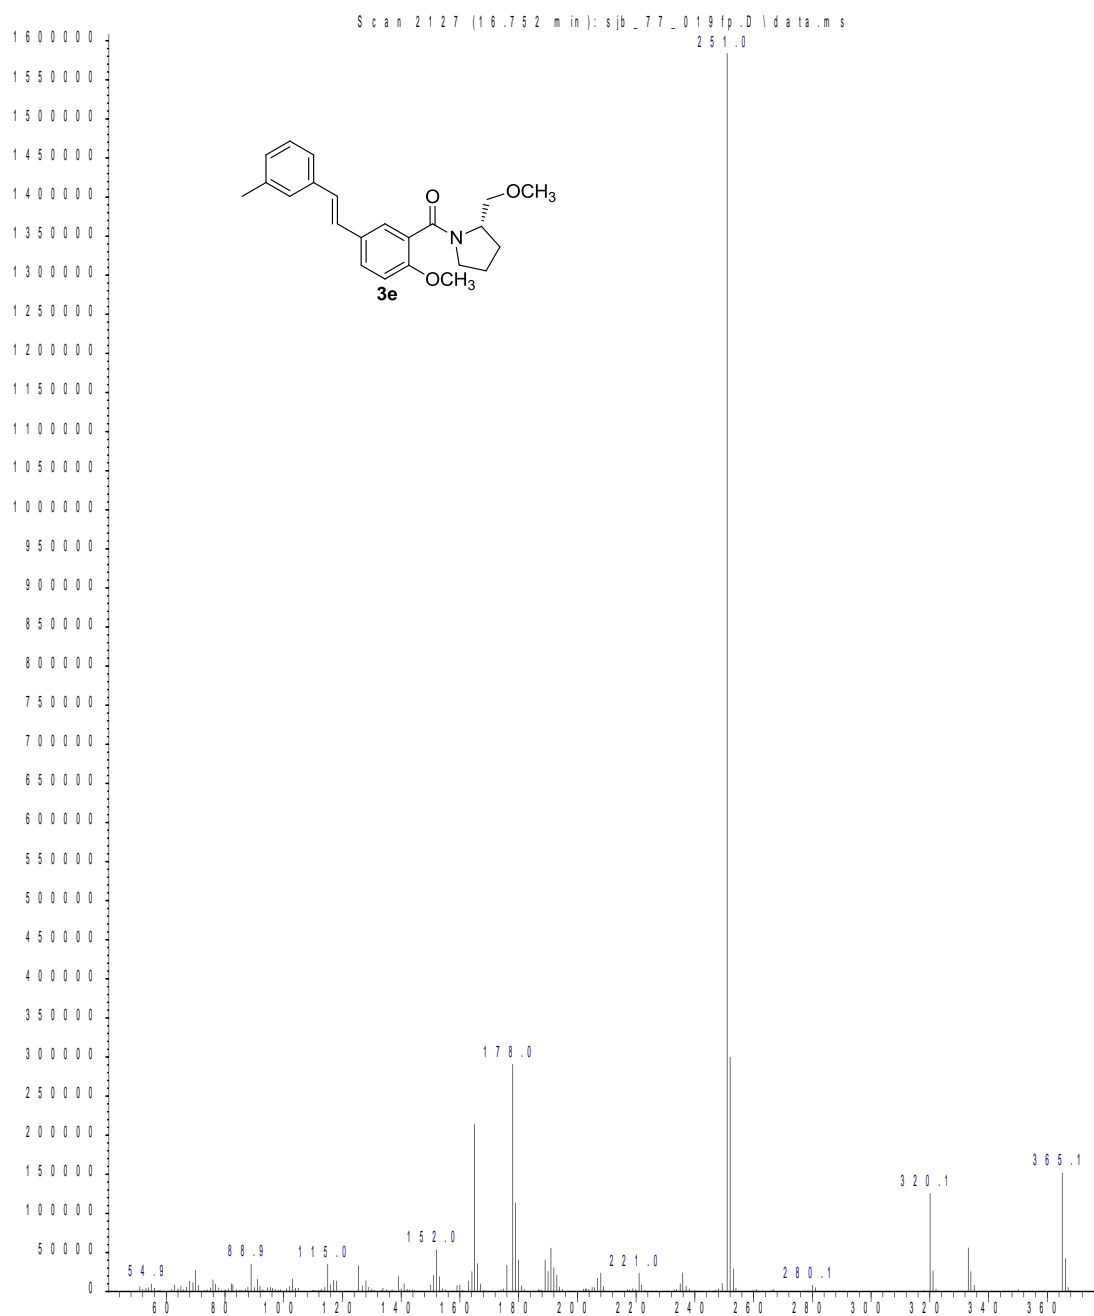

m/z-->

Abundance

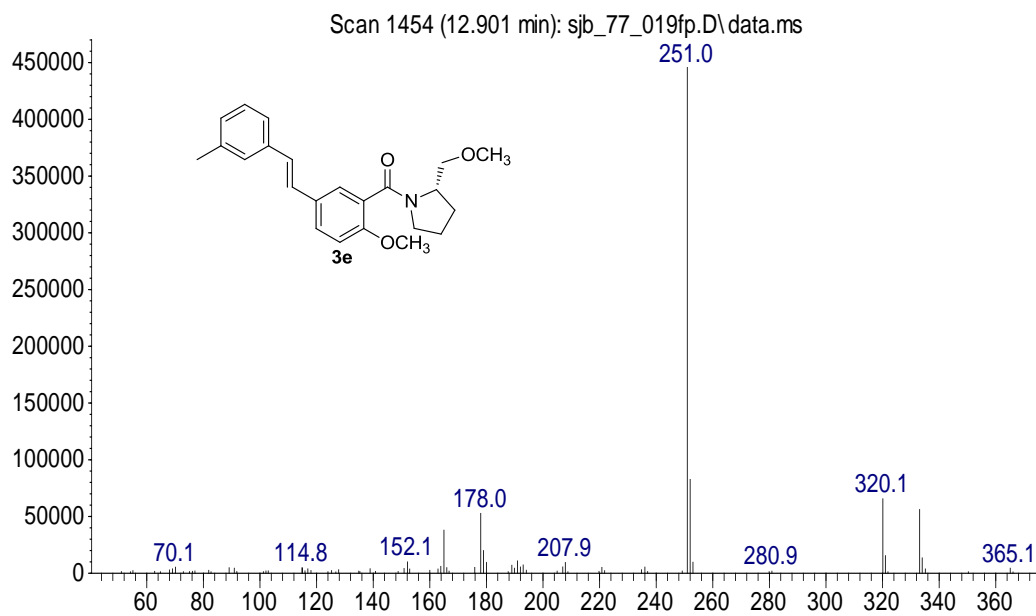

m/z-->

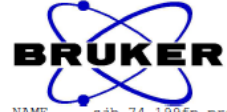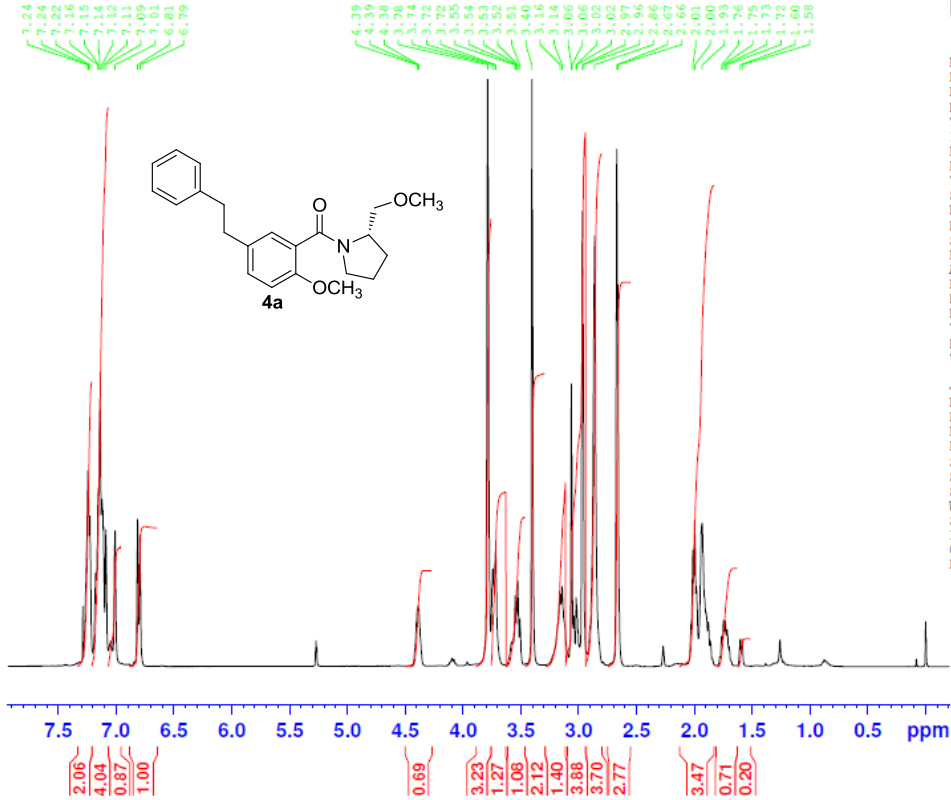

NAME sjb\_74\_199fp proton  
EXPNO 1  
PROCNO 1  
Date\_ 20121109  
Time 9.45  
INSTRUM spect  
PROBHD 5 mm PABBO BB-  
PULPROG zg30  
TD 65536  
SOLVENT CDC13  
NS 16  
DS 2  
SWH 8223.685 Hz  
FIDRES 0.125483 Hz  
AQ 3.9846387 sec  
RG 28.5  
DW 60.800 usec  
DE 6.50 usec  
TE 301.2 K  
D1 1.00000000 sec  
TDO 1

CHANNEL f1  
NUC1 1H  
P1 12.50 usec  
PL1 -2.00 dB  
PL1W 12.14226913 W  
SFO1 400.1524711 MHz  
SI 32768  
SF 400.1499967 MHz  
WDW EM  
SSB 0  
LB 0.30 Hz  
GB 0  
PC 1.00

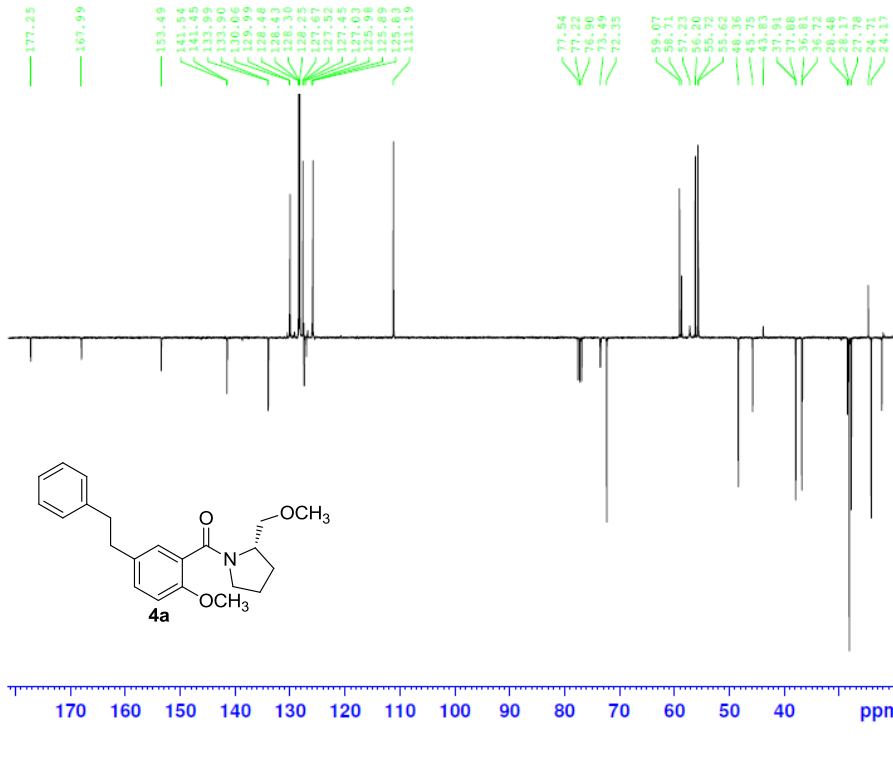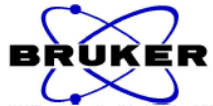

NAME sjb\_74\_199fp APT  
EXPNO 1  
PROCNO 1  
Date\_ 20121112  
Time 9.26  
INSTRUM spect  
PROBHD 5 mm PABBO BB-  
PULPROG jmod  
TD 65536  
SOLVENT CDC13  
NS 1024  
DS 4  
SWH 16339.869 Hz  
FIDRES 0.249327 Hz  
AQ 2.0054517 sec  
RG 203  
DW 30.600 usec  
DE 6.50 usec  
TE 301.2 K  
CNST2 145.0000000  
CNST11 1.0000000  
D1 2.00000000 sec  
D20 0.00689655 sec  
TDO 1

CHANNEL f1  
NUC1 13C  
P1 8.00 usec  
P2 16.00 usec  
PL1 -2.00 dB  
PL1W 56.13311005 W  
SFO1 100.6278685 MHz  
CHANNEL f2  
CPDPRG2 waltz16  
NUC2 1H  
PCPD2 80.00 usec  
PL2 -2.00 dB  
PL2 14.00 dB  
PL2W 12.14226913 W  
PL12W 0.30500001 W  
SFO2 400.1514948 MHz  
SI 32768  
SF 100.6177980 MHz  
WDW EM  
SSB 0  
LB 1.00 Hz  
GB 0  
PC 1.40

Area Percent Report

Data Path : C:\msdchem\1\DATA\  
Data File : sjb\_74\_199fp.D  
Acq On : 9 Nov 2012 13:56  
Operator : sjb  
Sample : sjb\_74\_199fp  
Misc :  
ALS Vial : 15 Sample Multiplier: 1

Integration Parameters: autoint1.e  
Integrator: ChemStation

Method : C:\msdchem\1\METHODS\JMB2.m  
Title :

Signal : TIC: sjb\_74\_199fp.D\data.ms

| peak # | R.T. min | first scan | max scan | last scan | PK TY | peak height | corr. area | corr. % max. | % of total |
|--------|----------|------------|----------|-----------|-------|-------------|------------|--------------|------------|
| 1      | 10.007   | 946        | 948      | 956       | VV 3  | 41194       | 970477     | 0.26%        | 0.246%     |
| 2      | 11.983   | 1281       | 1294     | 1302      | BV    | 1081831     | 18401106   | 4.91%        | 4.665%     |
| 3      | 12.569   | 1367       | 1396     | 1431      | PV    | 12857242    | 375088829  | 100.00%      | 95.089%    |

Sum of corrected areas: 394460412

JMB2.m Mon Nov 12 09:44:14 2012

Abundance

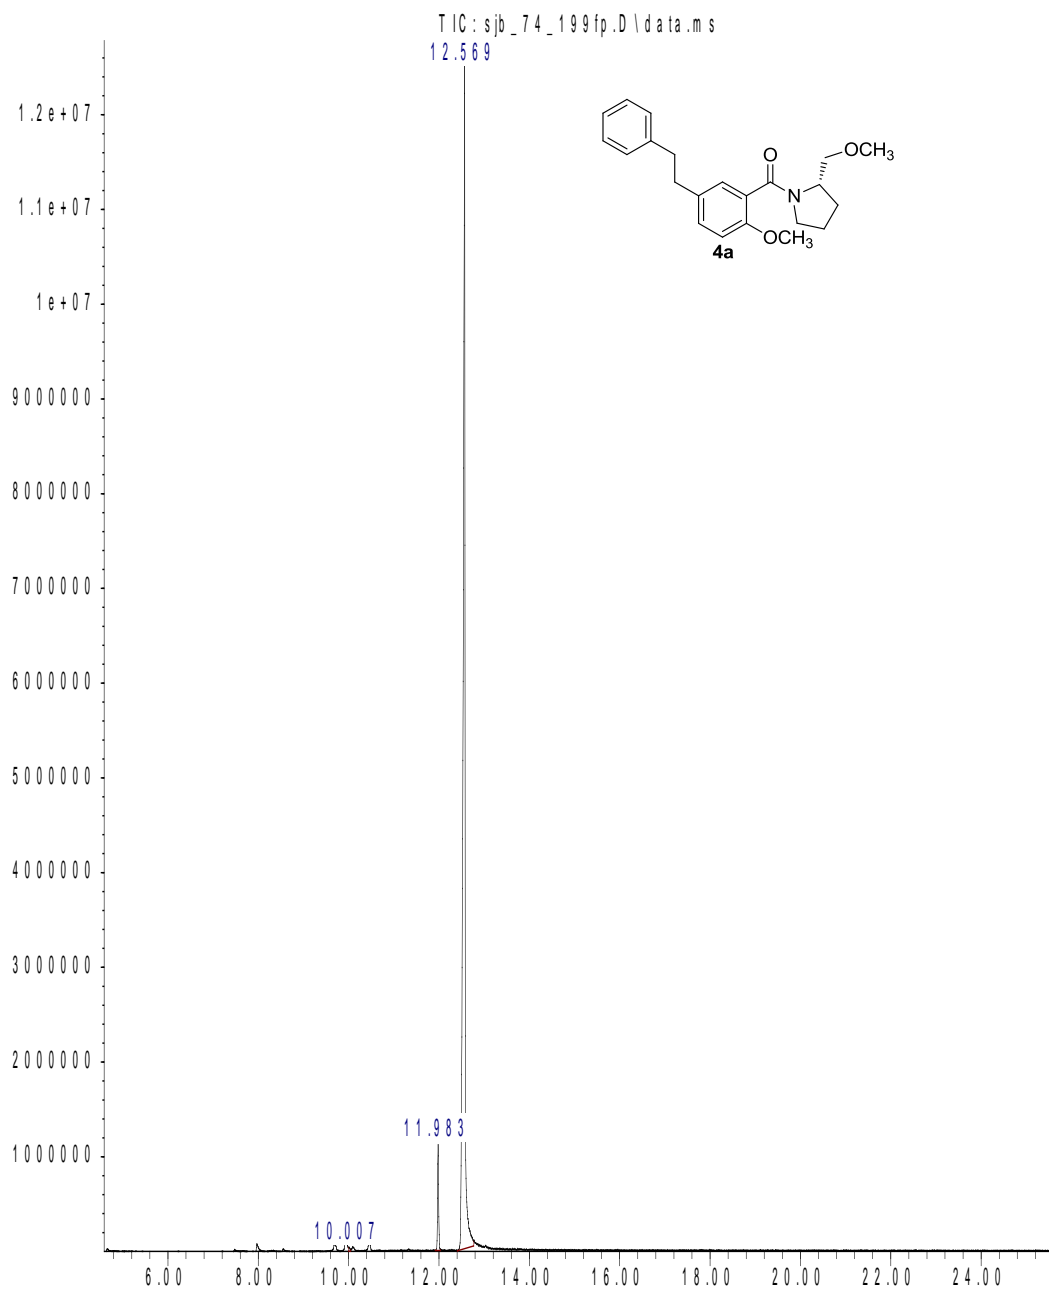

Time-->

Abundance

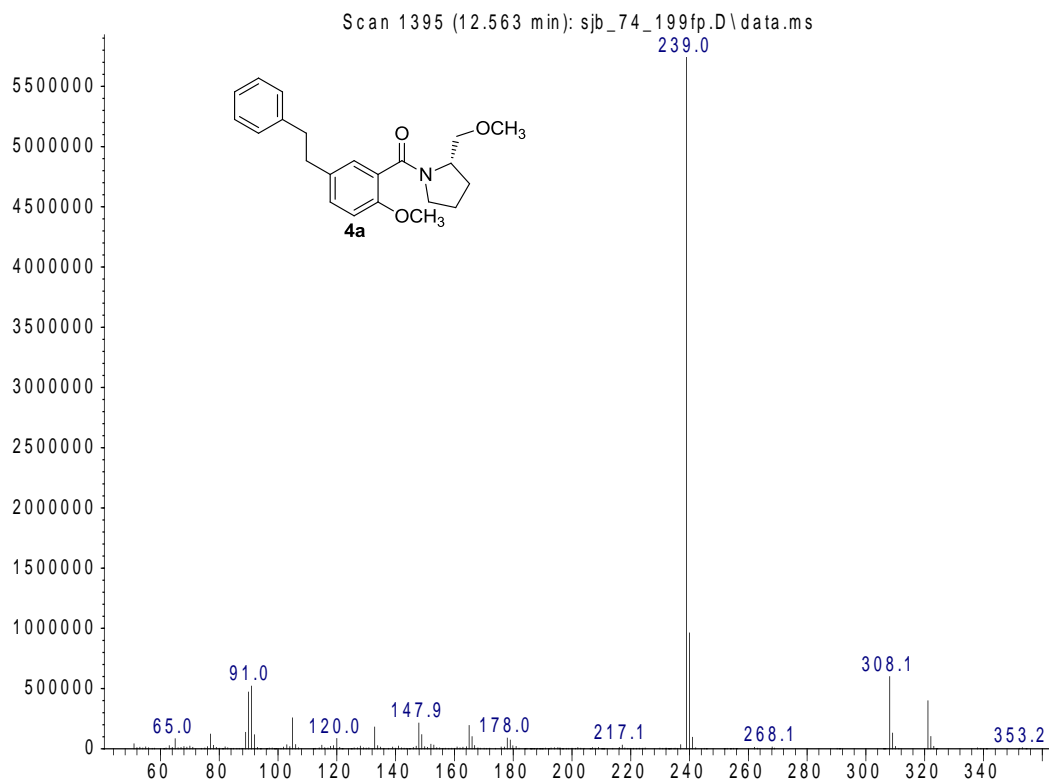

m/z-->

Abundance

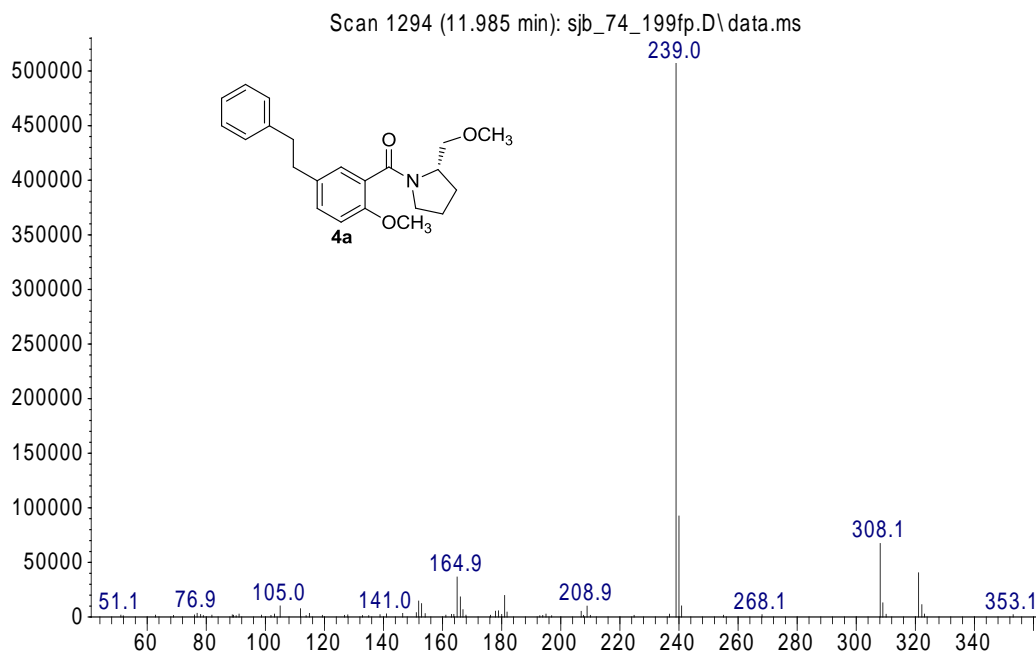

m/z-->

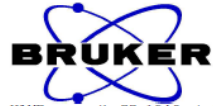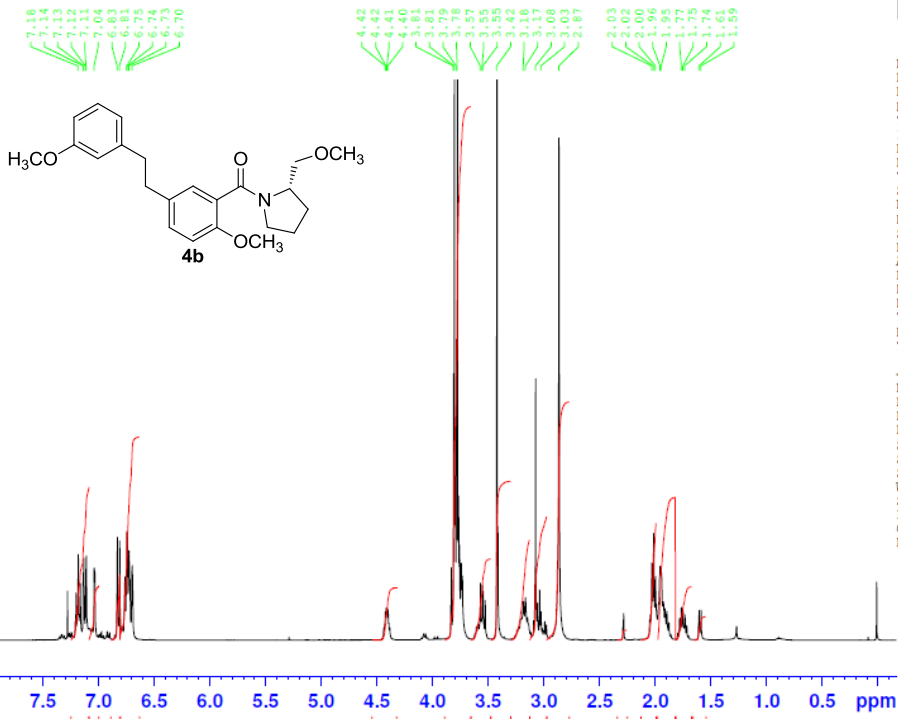

```
NAME      sjb_77_154fp take2
EXPNO    1
PROCNO   1
Date_    20130725
Time     7.53
INSTRUM  spect
PROBHD   5 mm PABBO BB-
PULPROG  zg30
TD       65536
SOLVENT  CDCl3
NS       16
DS       2
SWH      8223.685 Hz
FIDRES   0.125403 Hz
AQ       3.9846387 sec
RG       45.2
DW       60.800 usec
DE       6.50 usec
TE       301.2 K
D1       1.00000000 sec
TDO     1

----- CHANNEL f1 -----
NUC1     1H
P1       12.50 usec
PL1     -2.00 dB
PL1W    12.14226913 W
SFO1    400.1524711 MHz
SI       32768
SF       400.1500000 MHz
WDW      EM
SSB      0
LB       0.30 Hz
GB       0
PC       1.00
```

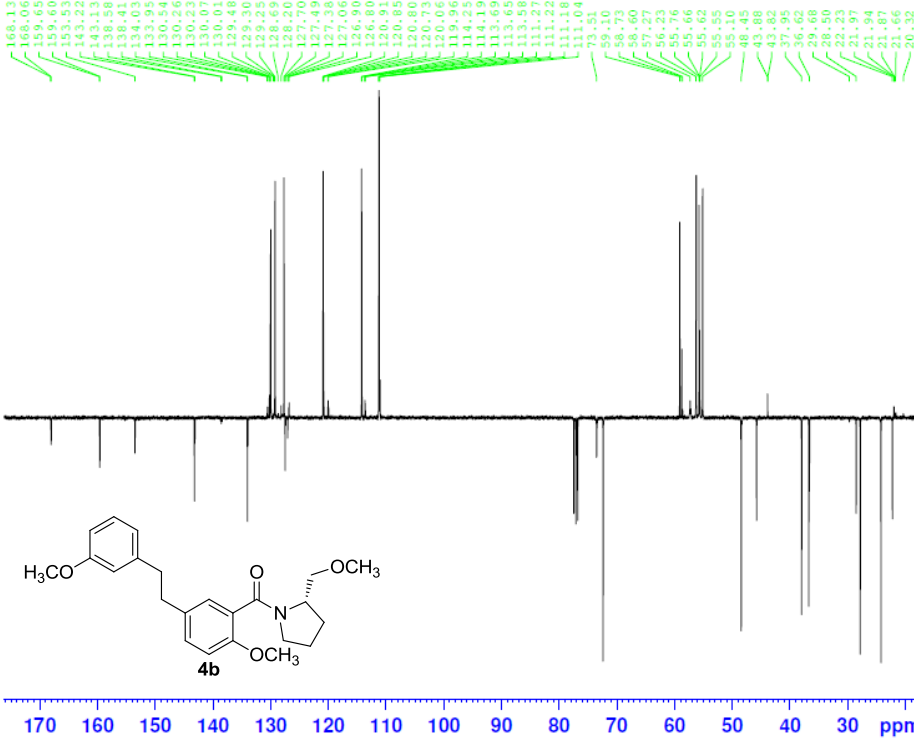

```
Current Data Parameters
NAME      sjb_77_154fp APT
EXPNO    1
PROCNO   1

F2 - Acquisition Parameters
Date_    20130725
Time     8.56
INSTRUM  spect
PROBHD   5 mm PABBO BB-
PULPROG  jmod
TD       65536
SOLVENT  CDCl3
NS       1024
DS       4
SWH      24038.461 Hz
FIDRES   0.366798 Hz
AQ       1.3631488 sec
RG       203
DW       20.800 usec
DE       6.50 usec
TE       301.2 K
CNST2    145.0000000
CNST11   1.0000000
D1       2.00000000 sec
D20     0.00689655 sec
TDO     1

----- CHANNEL f1 -----
NUC1     13C
P1       8.00 usec
P2      16.00 usec
PL1     -2.00 dB
PL1W    56.13311005 W
SFO1    100.6278593 MHz

----- CHANNEL f2 -----
CPDPRG[2] waltz16
NUC2     1H
PCPD2    80.00 usec
PL2     -2.00 dB
PL12    14.00 dB
PL2W    12.14226913 W
PL12W   0.30500001 W
SFO2    400.1515703 MHz

F2 - Processing parameters
SI       32768
SF       100.6177980 MHz
WDW      EM
SSB      0
LB       1.00 Hz
GB       0
PC       1.40
```

Area Percent Report

Data Path : C:\msdchem\1\DATA\  
Data File : sjb\_74\_029fp.D  
Acq On : 15 Jun 2012 8:44  
Operator : sjb  
Sample : sjb\_74\_029fp  
Misc :  
ALS Vial : 30 Sample Multiplier: 1

Integration Parameters: autoint1.e  
Integrator: ChemStation

Method : C:\msdchem\1\METHODS\JMB2.m  
Title :

Signal : TIC: sjb\_74\_029fp.D\data.ms

| peak # | R.T. min | first scan | max scan | last scan | PK TY | peak height | corr. area | corr. % max. | % of total |
|--------|----------|------------|----------|-----------|-------|-------------|------------|--------------|------------|
| 1      | 7.427    | 491        | 497      | 525       | BV    | 840988      | 12778818   | 0.54%        | 0.519%     |
| 2      | 7.944    | 582        | 588      | 603       | BV    | 558514      | 8620398    | 0.37%        | 0.350%     |
| 3      | 8.504    | 680        | 686      | 707       | PV    | 130178      | 2996109    | 0.13%        | 0.122%     |
| 4      | 13.731   | 1566       | 1599     | 1622      | PV    | 2596360     | 88351274   | 3.77%        | 3.589%     |
| 5      | 13.881   | 1622       | 1625     | 1634      | VV 5  | 37747       | 1023498    | 0.04%        | 0.042%     |
| 6      | 14.105   | 1652       | 1664     | 1683      | VV 4  | 67239       | 1888313    | 0.08%        | 0.077%     |
| 7      | 14.782   | 1719       | 1783     | 1849      | PV 2  | 31773351    | 2345930512 | 100.00%      | 95.301%    |

Sum of corrected areas: 2461588922

JMB2.m Mon Nov 12 09:52:24 2012



Abundance

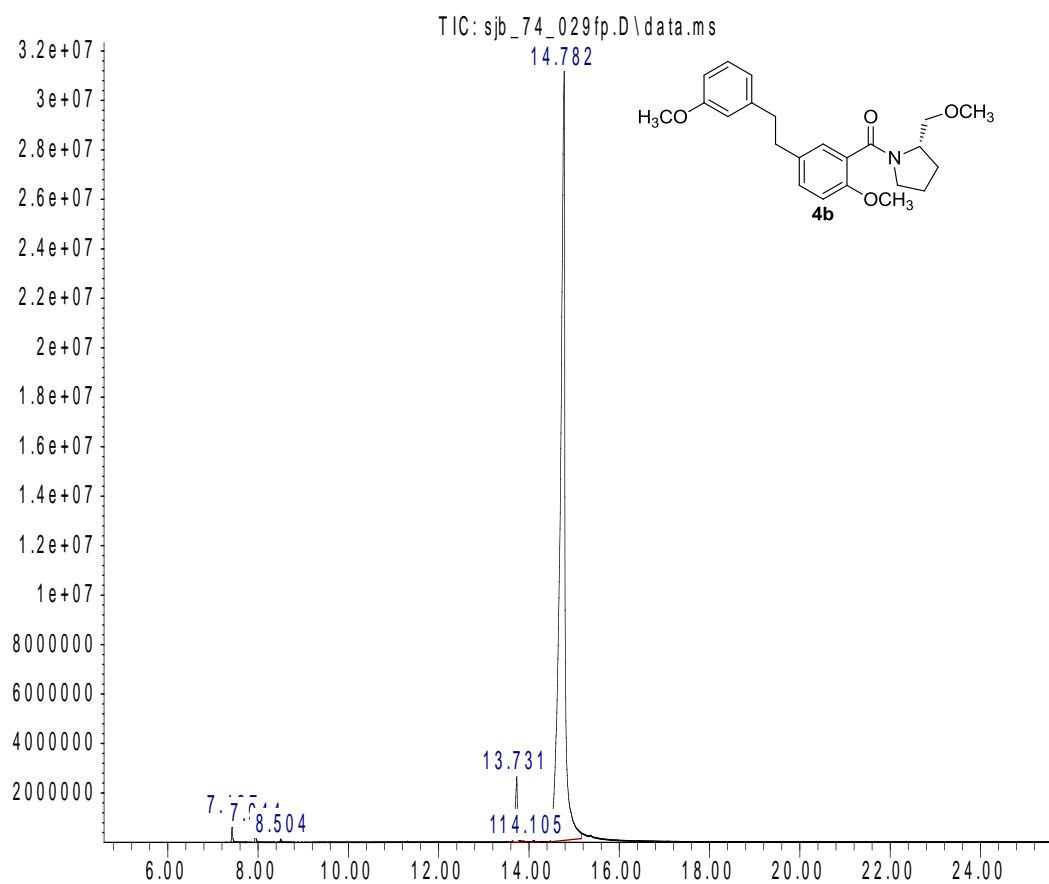

Abundance

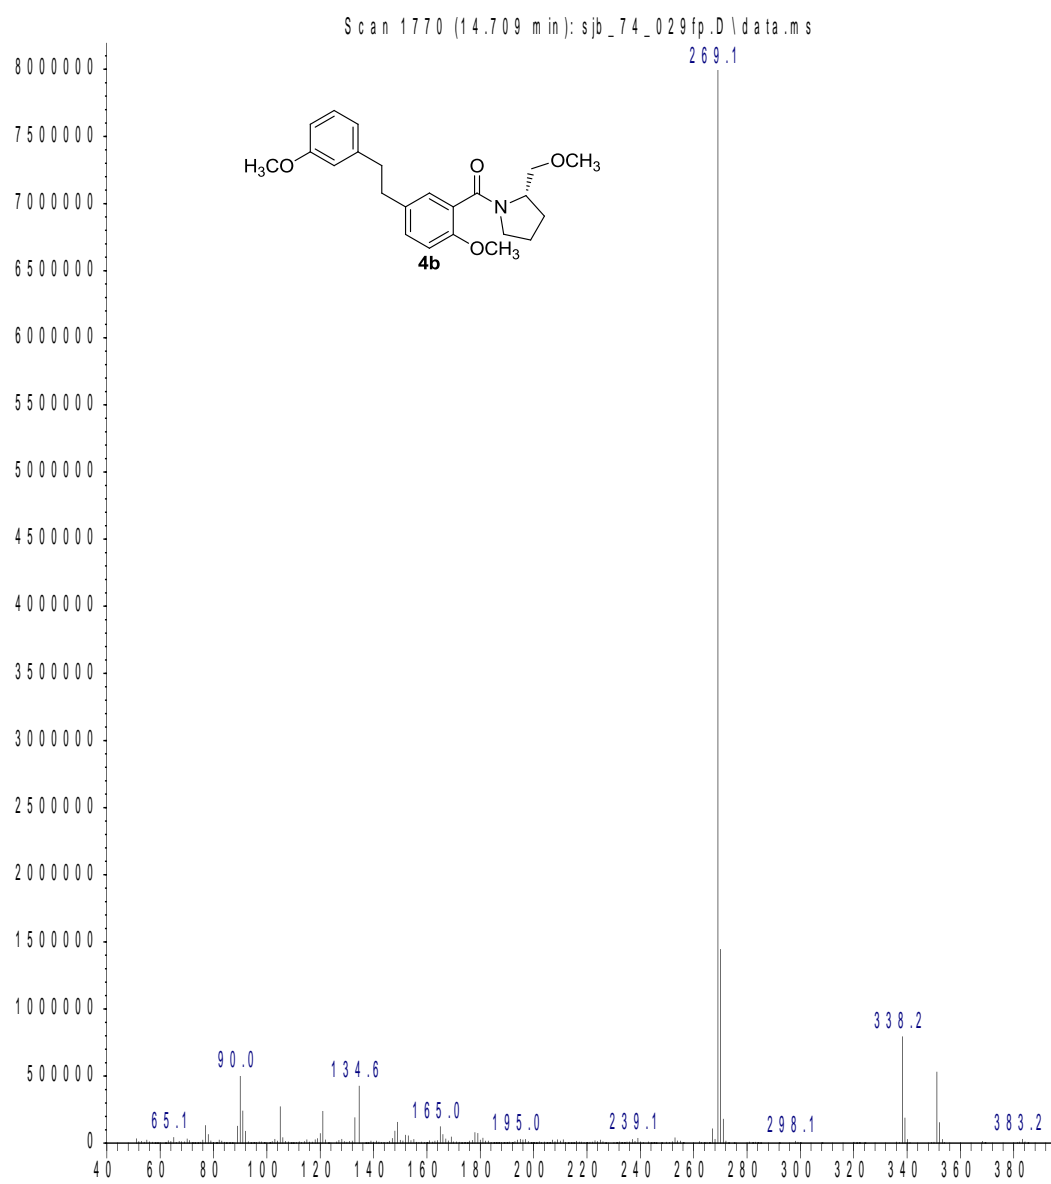

m/z-->

Abundance

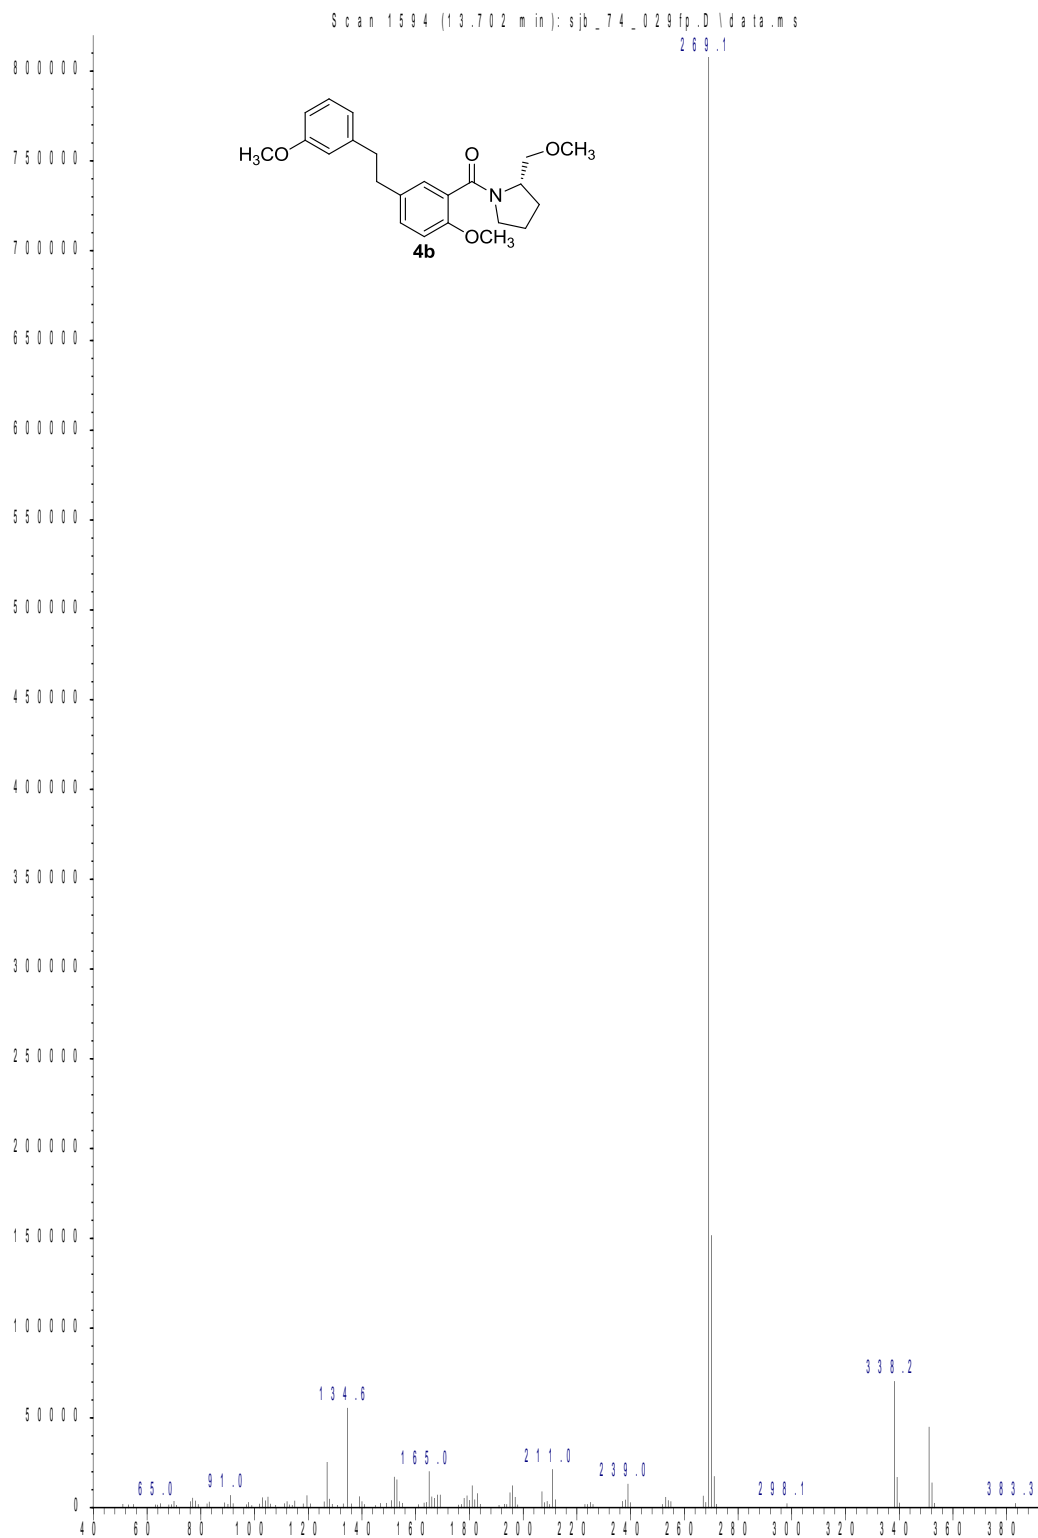

m/z-->

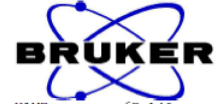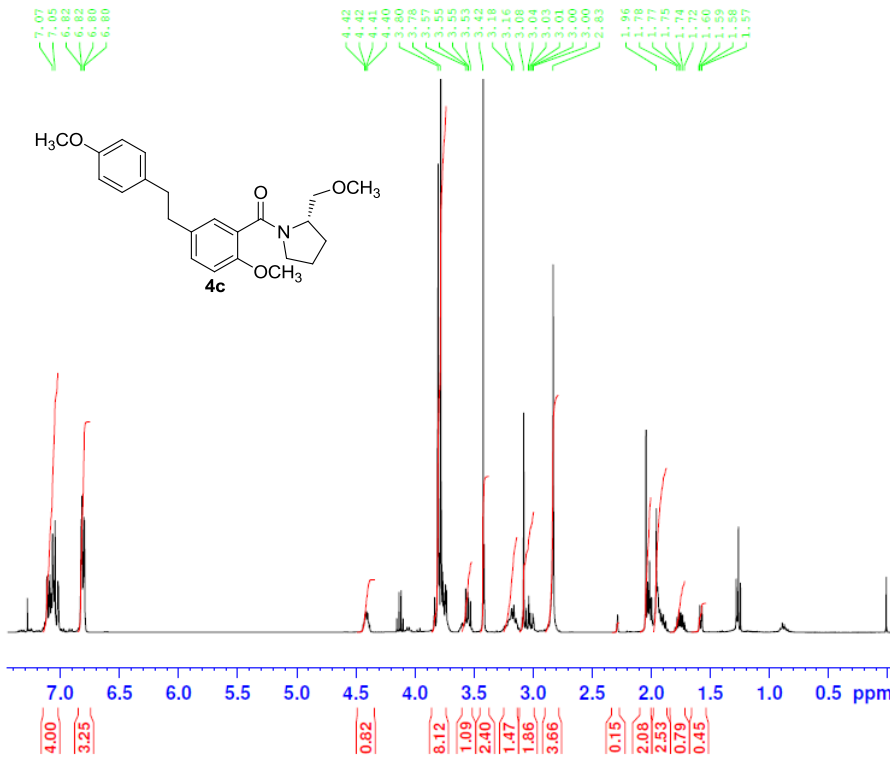

```

NAME ra_67_149pure
EXPNO 1
PROCNO 1
Date_ 20120718
Time 11.52
INSTRUM spect
PROBHD 5 mm PABBO BB-
PULPROG zg30
TD 65536
SOLVENT CDC13
NS 16
DS 2
SWH 8223.685 Hz
FIDRES 0.125483 Hz
AQ 3.984637 sec
RG 40.3
DW 60.800 usec
DE 6.50 usec
TE 301.2 K
D1 1.00000000 sec
TDO 1

```

```

===== CHANNEL f1 =====
NUC1 1H
P1 12.50 usec
PL1 -2.00 dB
PL1W 12.14226913 W
SFO1 400.1524711 MHz
SI 32768
SF 400.1500000 MHz
WDW EM
SSB 0
LB 0.30 Hz
GB 0
PC 1.00

```

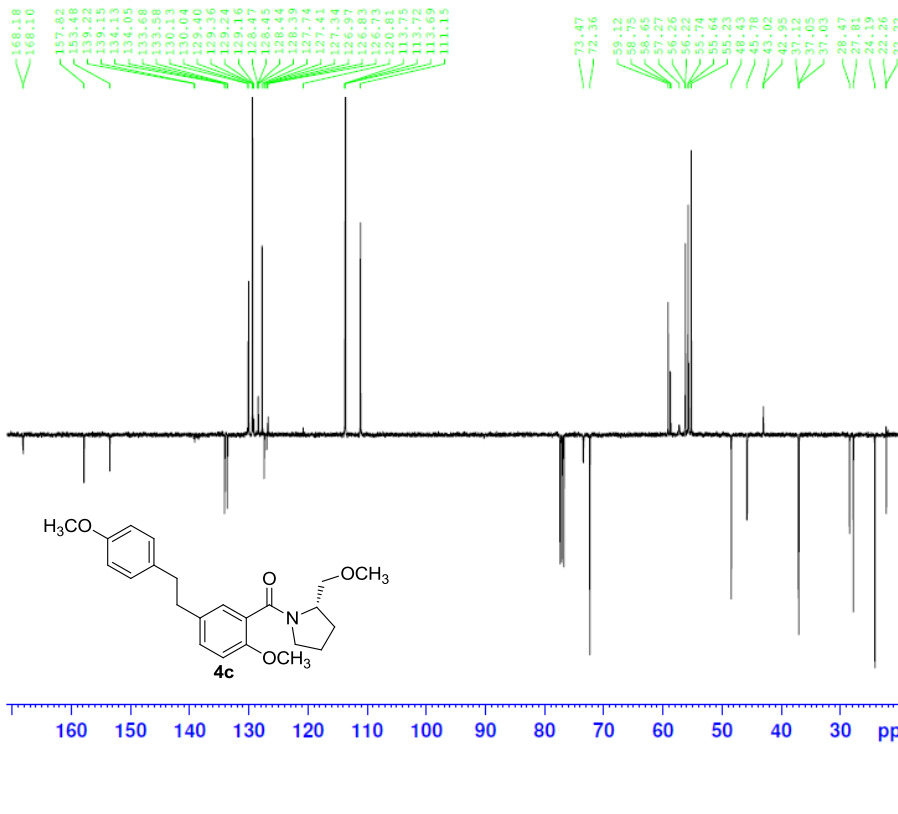

```

Current Data Parameters
NAME sjb_77_217 APT2
EXPNO 1
PROCNO 1
F2 - Acquisition Parameters
Date_ 20131014
Time 13.57
INSTRUM spect
PROBHD 5 mm PABBO BB-
PULPROG jmod
TD 65536
SOLVENT CDC13
NS 1024
DS 4
SWH 24038.461 Hz
FIDRES 0.366798 Hz
AQ 1.3631488 sec
RG 203
DW 20.800 usec
DE 6.50 usec
TE 298.2 K
CNST2 145.0000000
CNST11 1.00000000
D1 2.00000000 sec
D20 0.00689655 sec
TDO 1

```

```

===== CHANNEL f1 =====
NUC1 13C
P1 8.00 usec
P2 16.00 usec
PL1 -2.00 dB
PL1W 56.13311005 W
SFO1 100.6278593 MHz
===== CHANNEL f2 =====
CPDPRG[2] waltz16
NUC2 1H
PCPD2 75.00 usec
PL2 -2.00 dB
PL12 13.39 dB
PL2W 12.14226913 W
PL12W 0.35099408 W
SFO2 400.1515863 MHz

```

```

F2 - Processing parameters
SI 32768
SF 100.6177980 MHz
WDW EM
SSB 0
LB 1.00 Hz
GB 0
PC 1.40

```

Area Percent Report

Data Path : C:\msdchem\1\DATA\  
Data File : sjb\_77\_217fp.D  
Acq On : 17 Sep 2013 11:20  
Operator : sjb  
Sample : sjb\_77\_217fp  
Misc :  
ALS Vial : 95 Sample Multiplier: 1

Integration Parameters: atuneWPMMar14.e  
Integrator: ChemStation

Method : C:\msdchem\1\METHODS\ckr3.m  
Title :

Signal : TIC: sjb\_77\_217fp.D\data.ms

| peak # | R.T. min | first scan | max scan | last scan | PK TY | peak height | corr. area | corr. % max. | % of total |
|--------|----------|------------|----------|-----------|-------|-------------|------------|--------------|------------|
| 1      | 13.988   | 1631       | 1644     | 1656      | VV    | 419295      | 10837930   | 11.40%       | 10.200%    |
| 2      | 14.755   | 1750       | 1778     | 1815      | PV    | 2274434     | 95093596   | 100.00%      | 89.494%    |
| 3      | 14.972   | 1815       | 1816     | 1826      | VV 6  | 13174       | 325675     | 0.34%        | 0.306%     |

Sum of corrected areas: 106257201

ckr3.m Wed Mar 19 09:43:04 2014

Abundance

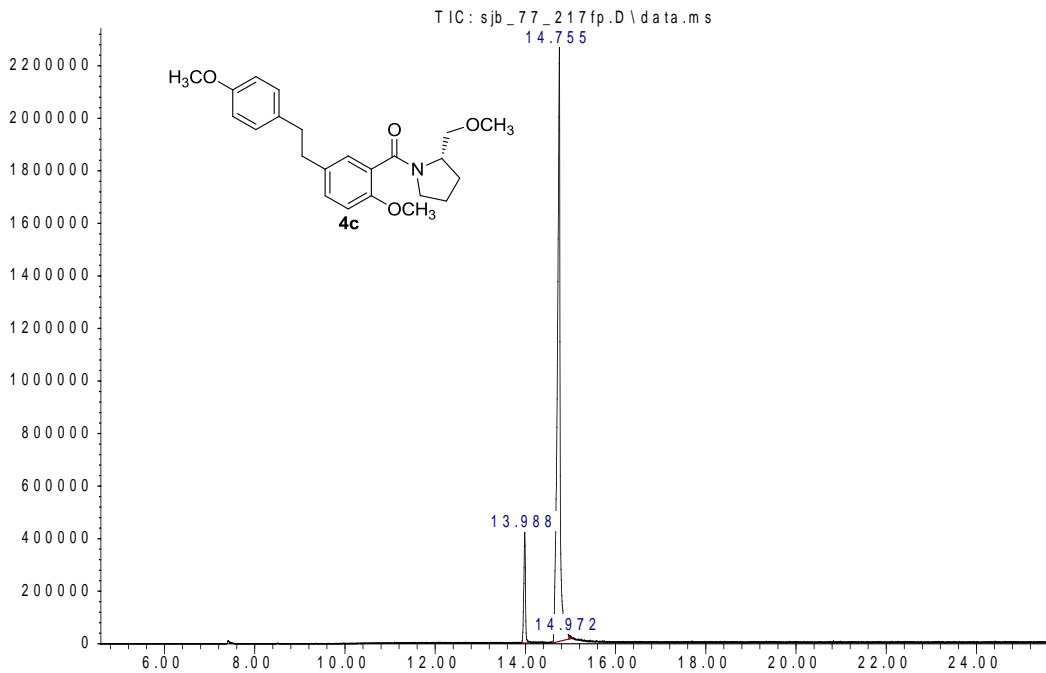

Abundance

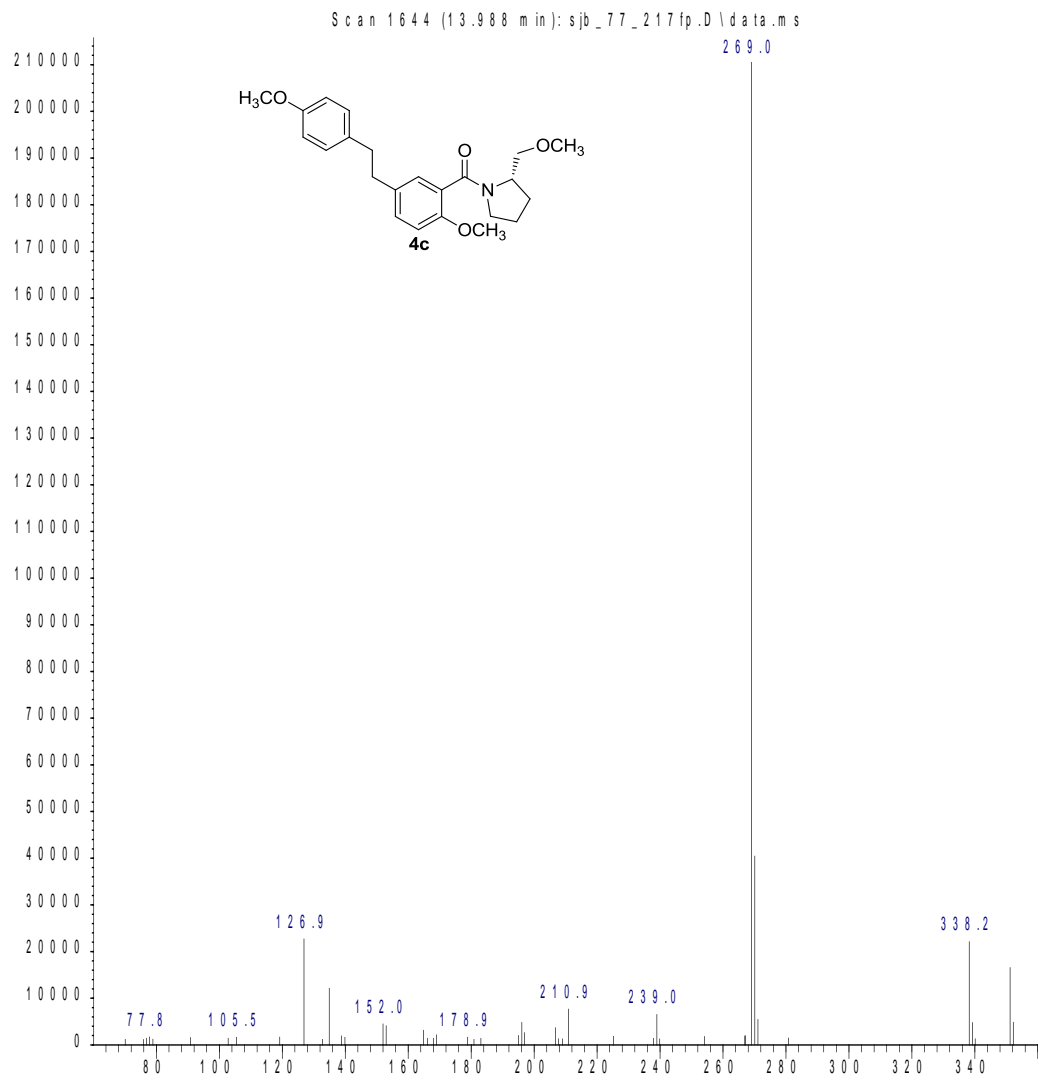

m/z-->

Abundance

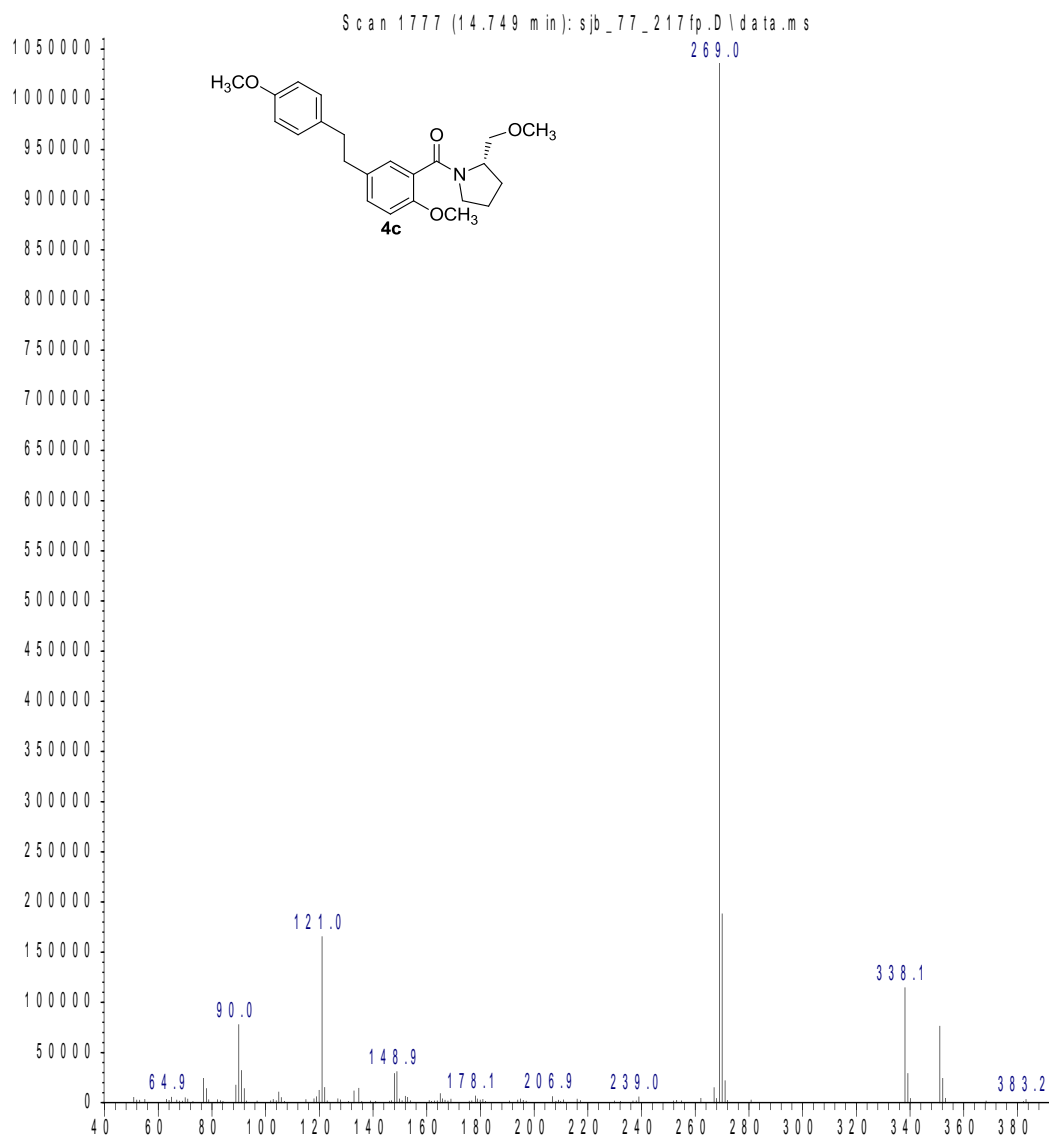

m/z-->

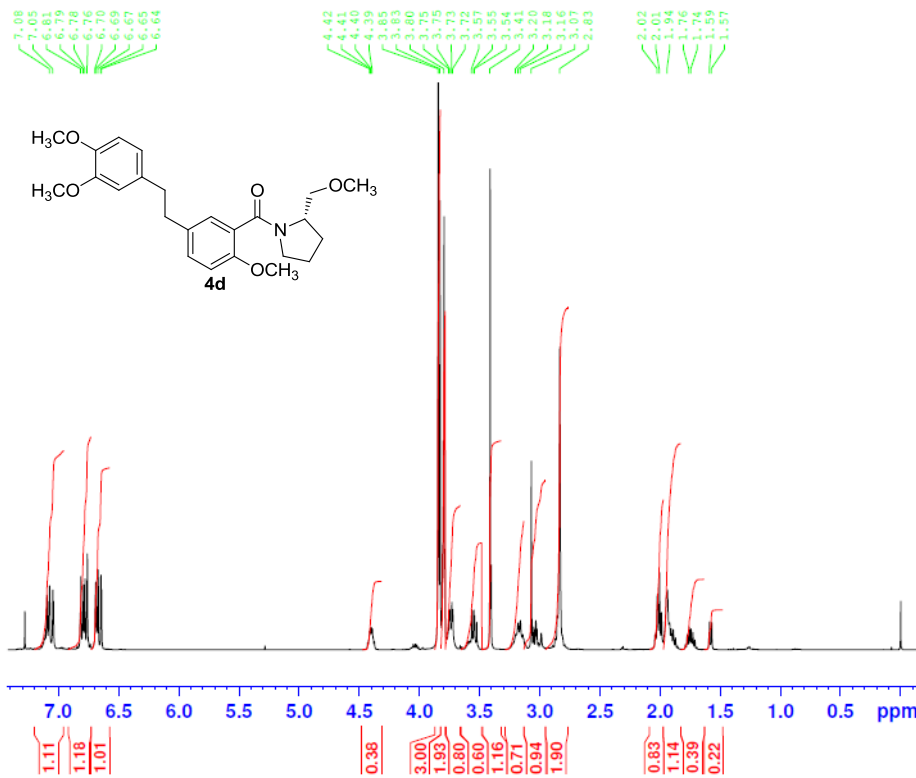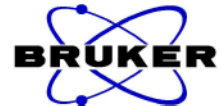

```

NAME      sjb_74_211fp take 2
EXPNO     1
PROCNO    1
Date_     20130716
Time      8.57
INSTRUM   spect
PROBHD    5 mm PABBO BB-
PULPROG   zg30
TD         65536
SOLVENT   CDC13
NS         16
DS         2
SWH       8223.685 Hz
FIDRES    0.125483 Hz
AQ        3.9846387 sec
RG         45.2
DW        60.800 usec
DE         6.50 usec
TE        301.2 K
D1        1.00000000 sec
TDO       1
  
```

```

----- CHANNEL f1 -----
NUC1      1H
P1        12.50 usec
PL1       -2.00 dB
PL1W      12.14226913 W
SFO1      400.1524711 MHz
SI        32768
SF        400.1500000 MHz
WDW       EM
SSB       0
LB        0.30 Hz
GB        0
PC        1.00
  
```

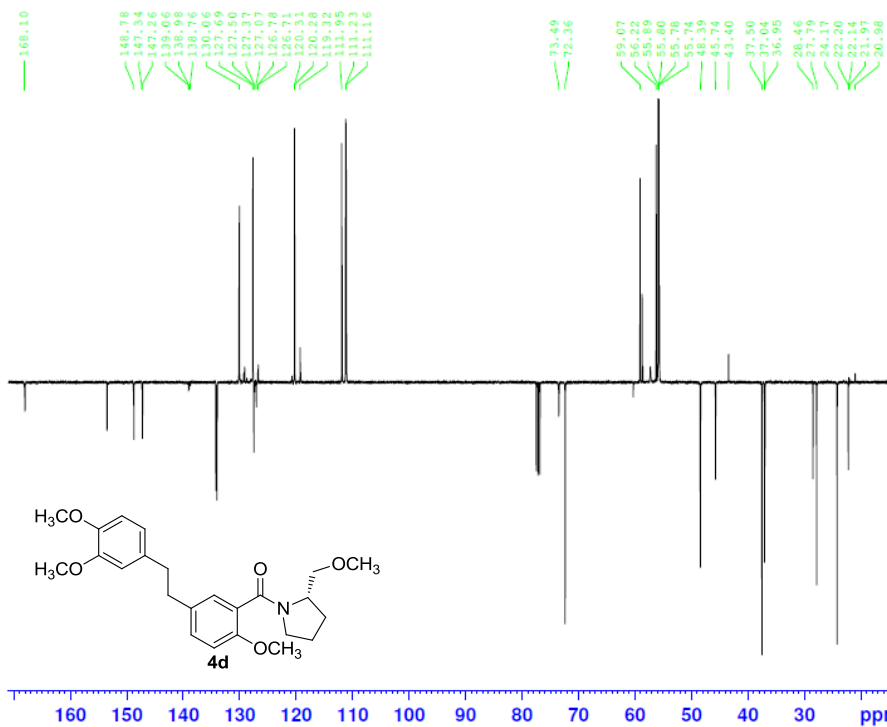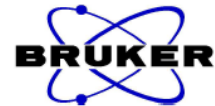

```

NAME      sjb_74_211fp 13CAPT
EXPNO     1
PROCNO    1
Date_     20121127
Time      9.51
INSTRUM   spect
PROBHD    5 mm PABBO BB-
PULPROG   jmod
TD         65536
SOLVENT   CDC13
NS         1024
DS         4
SWH       18750.000 Hz
FIDRES    0.286102 Hz
AQ        1.7476766 sec
RG         203
DW        26.667 usec
DE         6.50 usec
TE        301.2 K
CNST2     145.0000000
CNST11    1.0000000
D1        1.00000000 sec
D20       0.00689655 sec
TDO       1
  
```

```

----- CHANNEL f1 -----
NUC1      13C
P1        8.00 usec
P2        16.00 usec
PL1       -2.00 dB
PL1W      56.13311005 W
SFO1      100.6268218 MHz
  
```

```

----- CHANNEL f2 -----
CPDPRG2   waltz16
NUC2      1H
PCPD2     80.00 usec
PL2       -2.00 dB
PL12      14.00 dB
PL2W      12.14226913 W
PL12W     0.30500001 W
SFO2      400.1514721 MHz
SI        32768
SF        100.6177980 MHz
WDW       EM
SSB       0
LB        1.00 Hz
GB        0
PC        1.40
  
```



Area Percent Report

Data Path : C:\msdchem\1\DATA\  
 Data File : sjb\_77\_171fp.D  
 Acq On : 7 Aug 2013 16:17  
 Operator : sjb  
 Sample : sjb\_77\_171fp  
 Misc :  
 ALS Vial : 100 Sample Multiplier: 1

Integration Parameters: autoint1.e  
 Integrator: ChemStation

Method : C:\msdchem\1\5973N\PRECISION.M  
 Title :

Signal : TIC: sjb\_77\_171fp.D\data.ms

| peak # | R.T. min | first scan | max scan | last scan | PK TY | peak height | corr. area | corr. % max. | % of total |
|--------|----------|------------|----------|-----------|-------|-------------|------------|--------------|------------|
| 1      | 7.369    | 481        | 487      | 521       | BV    | 1282670     | 30810488   | 2.37%        | 2.176%     |
| 2      | 7.910    | 575        | 582      | 600       | BV    | 67415       | 1896048    | 0.15%        | 0.134%     |
| 3      | 15.589   | 1897       | 1924     | 1947      | PV    | 1927063     | 82443691   | 6.35%        | 5.824%     |
| 4      | 15.730   | 1947       | 1949     | 1953      | VV 5  | 27904       | 466958     | 0.04%        | 0.033%     |
| 5      | 16.860   | 2078       | 2146     | 2256      | PV    | 15294204    | 1299084977 | 100.00%      | 91.764%    |
| 6      | 17.501   | 2256       | 2258     | 2260      | VV 3  | 27053       | 299743     | 0.02%        | 0.021%     |
| 7      | 17.520   | 2260       | 2261     | 2272      | VV 7  | 26207       | 589949     | 0.05%        | 0.042%     |
| 8      | 17.593   | 2272       | 2274     | 2278      | VV 5  | 10384       | 82492      | 0.01%        | 0.006%     |

Sum of corrected areas: 1415674346

Abundance

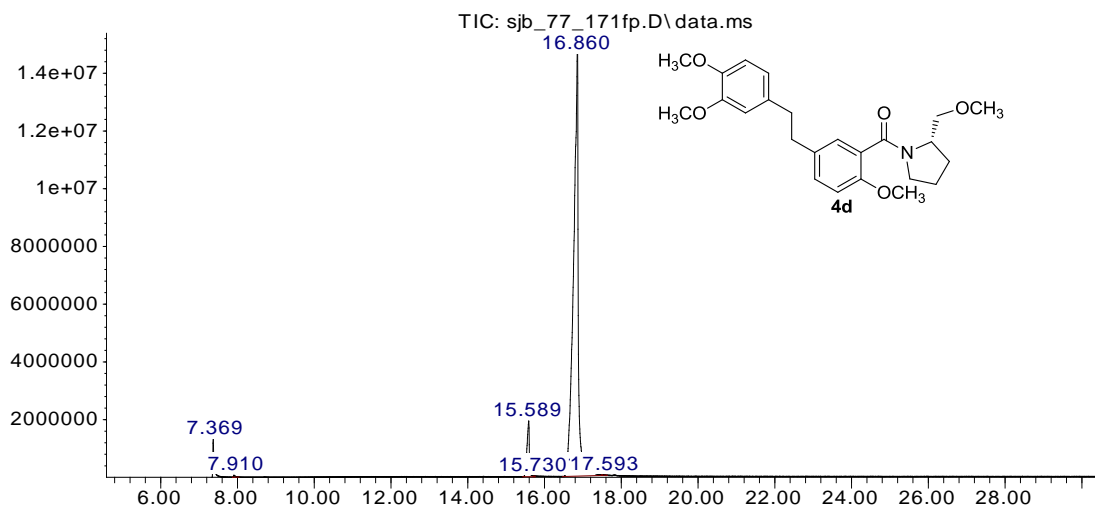

Time-->

Abundance

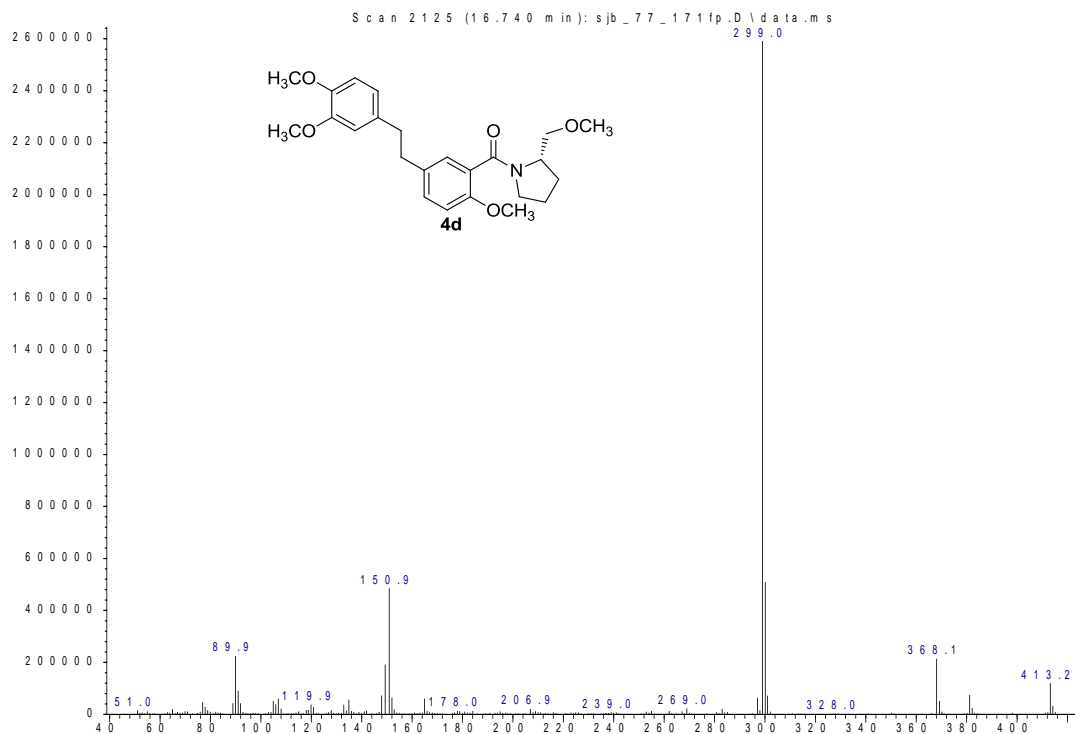

m/z-->  
Abundance

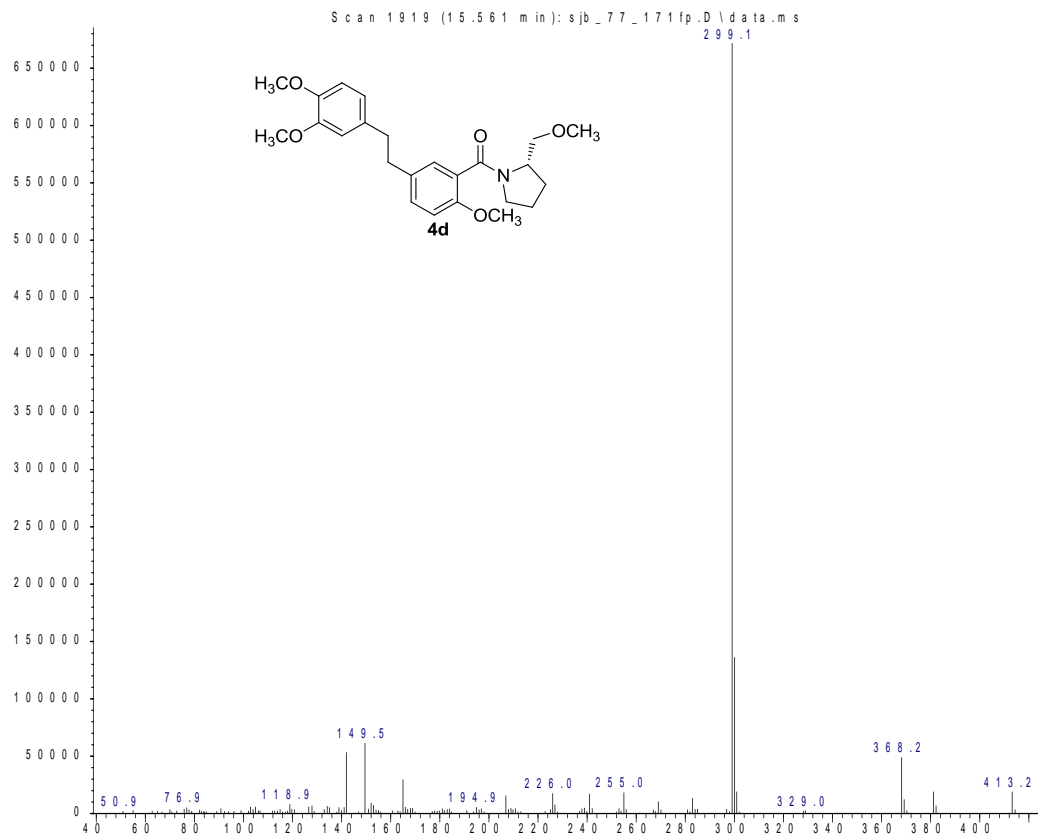

m/z-->

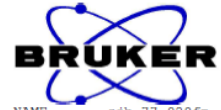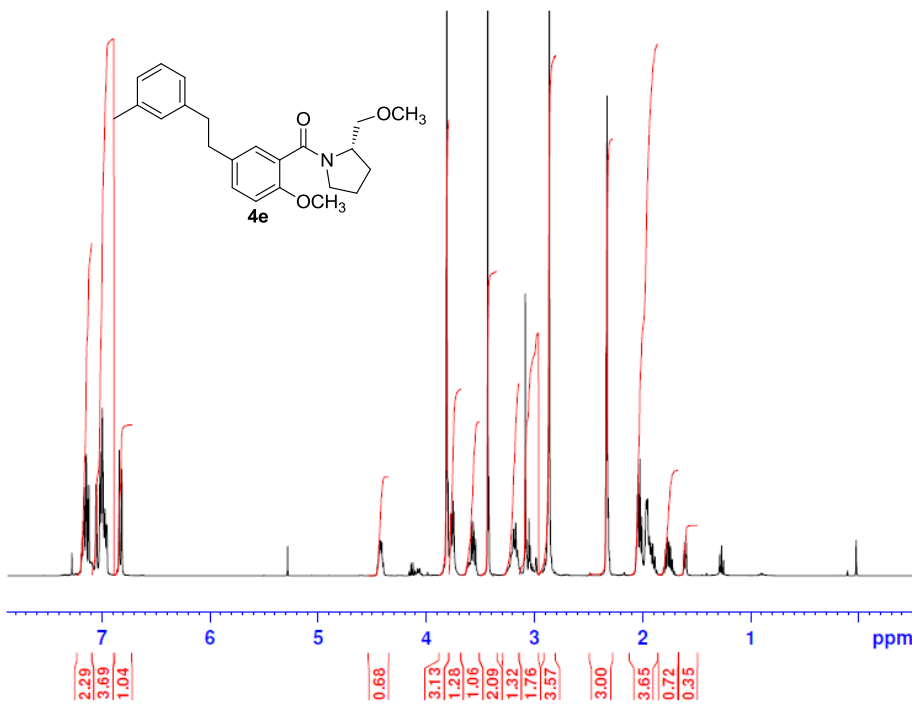

```
NAME      sjb_77_020fp
EXPNO     1
PROCNO    1
Date_     20121221
Time      11.07
INSTRUM   spect
PROBHD    5 mm PABBO BB-
PULPROG   zg30
TD         65536
SOLVENT   CDCl3
NS         16
DS         2
SWH        8223.685 Hz
FIDRES     0.125483 Hz
AQ         3.9846387 sec
RG         32
DW         60.800 usec
DE         6.50 usec
TE         303.1 K
D1         1.00000000 sec
TDO        1
```

```
===== CHANNEL f1 =====
NUC1      1H
P1         12.50 usec
PL1        -2.00 dB
PL1W      12.14226913 W
SFO1      400.1524711 MHz
SI         32768
SF         400.1500000 MHz
WDW        EM
SSB        0
LB         0.30 Hz
GB         0
PC         1.00
```

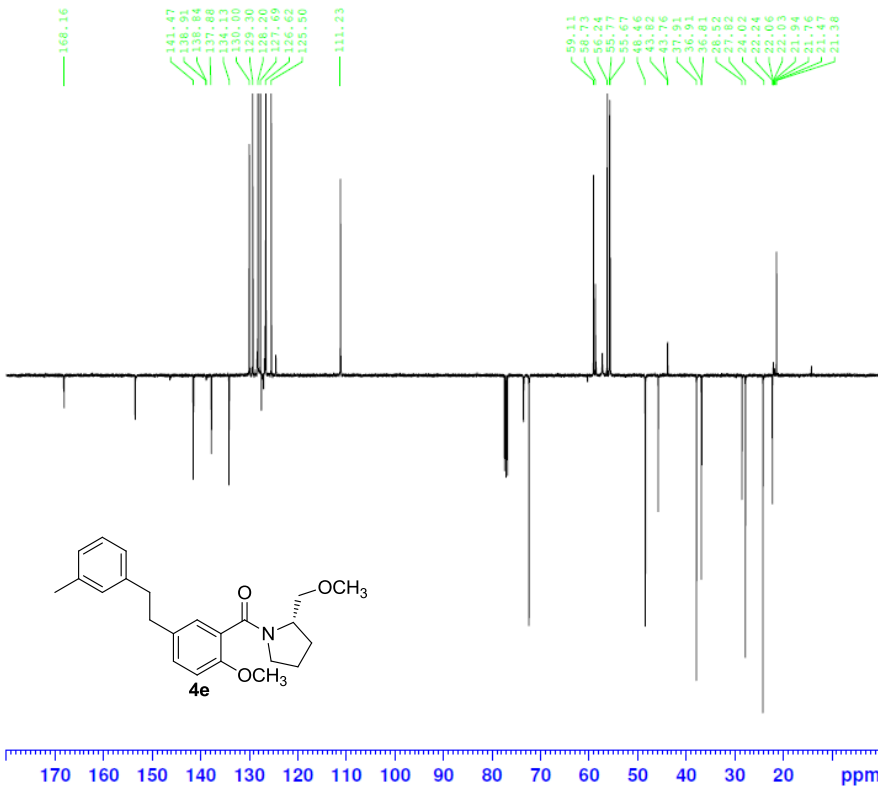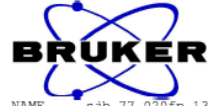

```
NAME      sjb_77_020fp 13CAPT
EXPNO     1
PROCNO    1
Date_     20121221
Time      12.46
INSTRUM   spect
PROBHD    5 mm PABBO BB-
PULPROG   jmod
TD         65536
SOLVENT   CDCl3
NS         1024
DS         4
SWH        18115.941 Hz
FIDRES     0.276427 Hz
AQ         1.8088436 sec
RG         203
DW         27.600 usec
DE         6.50 usec
TE         302.2 K
CNST2     145.0000000
CNST11    1.0000000
D1         2.00000000 sec
D20       0.00689655 sec
TDO        1
```

```
===== CHANNEL f1 =====
NUC1      13C
P1         8.00 usec
P2         16.00 usec
PL1        -2.00 dB
PL1W      56.13311005 W
SFO1      100.6268536 MHz
```

```
===== CHANNEL f2 =====
CPDPRG2   waltz16
NUC2      1H
PCPD2     80.00 usec
PL2        -2.00 dB
PL12      14.00 dB
PL2W      12.14226913 W
PL12W     0.30500001 W
SFO2      400.1514742 MHz
SI         32768
SF         100.6177980 MHz
WDW        EM
SSB        0
LB         1.00 Hz
GB         0
PC         1.40
```

Area Percent Report

Data Path : C:\msdchem\1\DATA\  
Data File : sjb\_77\_020fp.D  
Acq On : 21 Dec 2012 11:20  
Operator : sjb  
Sample : sjb\_77\_020fp  
Misc :  
ALS Vial : 20 Sample Multiplier: 1

Integration Parameters: autoint1.e  
Integrator: ChemStation

Method : C:\msdchem\1\5973N\PRECISION.M  
Title :

Signal : TIC: sjb\_77\_020fp.D\data.ms

| peak # | R.T. min | first scan | max scan | last scan | PK TY | peak height | corr. area | corr. % max. | % of total |
|--------|----------|------------|----------|-----------|-------|-------------|------------|--------------|------------|
| 1      | 8.530    | 682        | 690      | 708       | BV 5  | 27940       | 1033448    | 0.10%        | 0.092%     |
| 2      | 12.424   | 1351       | 1371     | 1395      | PV    | 2774270     | 64363753   | 6.16%        | 5.746%     |
| 3      | 12.680   | 1408       | 1415     | 1425      | VV 2  | 28357       | 755335     | 0.07%        | 0.067%     |
| 4      | 13.142   | 1463       | 1496     | 1523      | PV 2  | 24682415    | 1044588528 | 100.00%      | 93.256%    |
| 5      | 13.303   | 1523       | 1524     | 1533      | VV 6  | 187569      | 4711073    | 0.45%        | 0.421%     |
| 6      | 13.361   | 1533       | 1534     | 1567      | VV 8  | 94639       | 4673192    | 0.45%        | 0.417%     |

Sum of corrected areas: 1120125329

Abundance

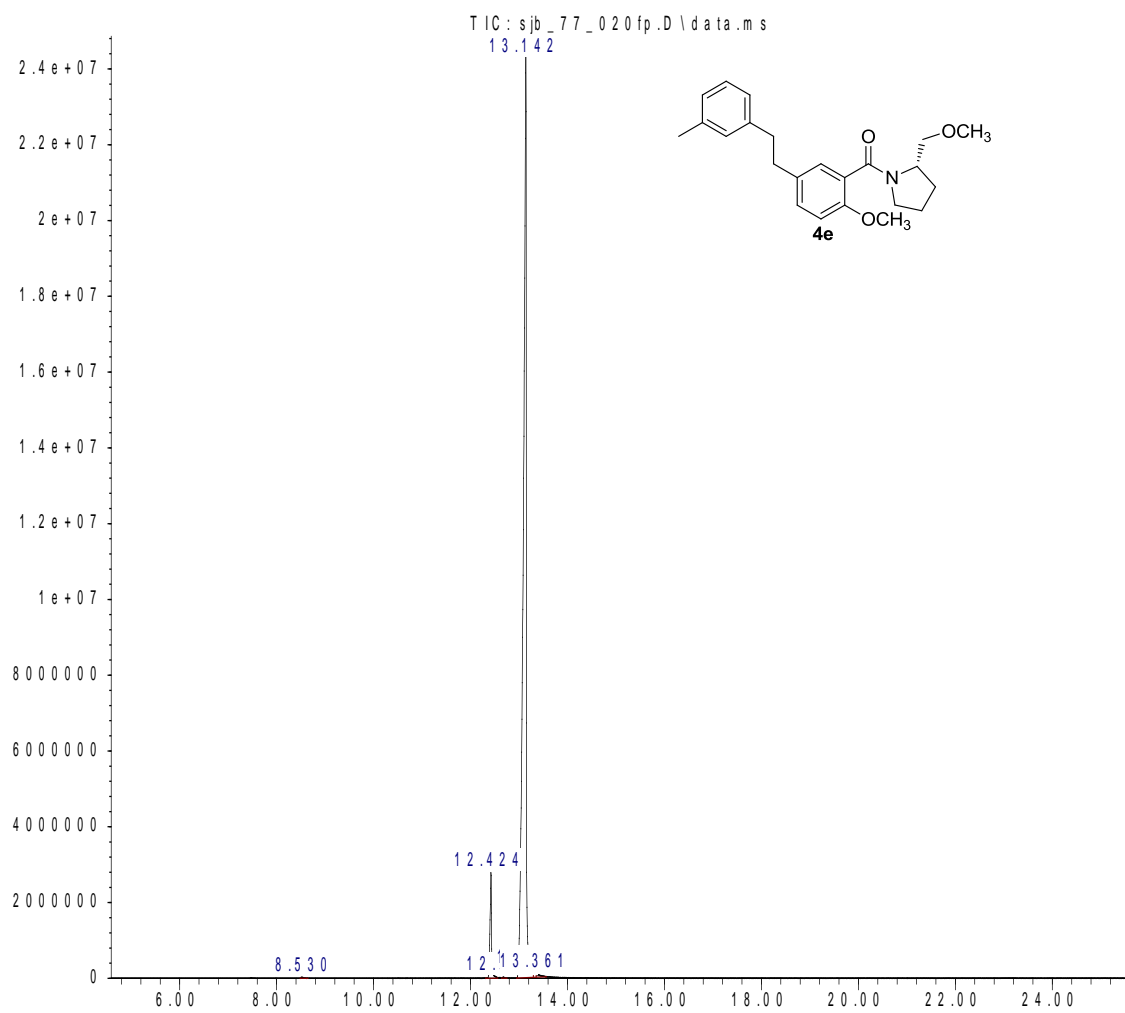

Abundance

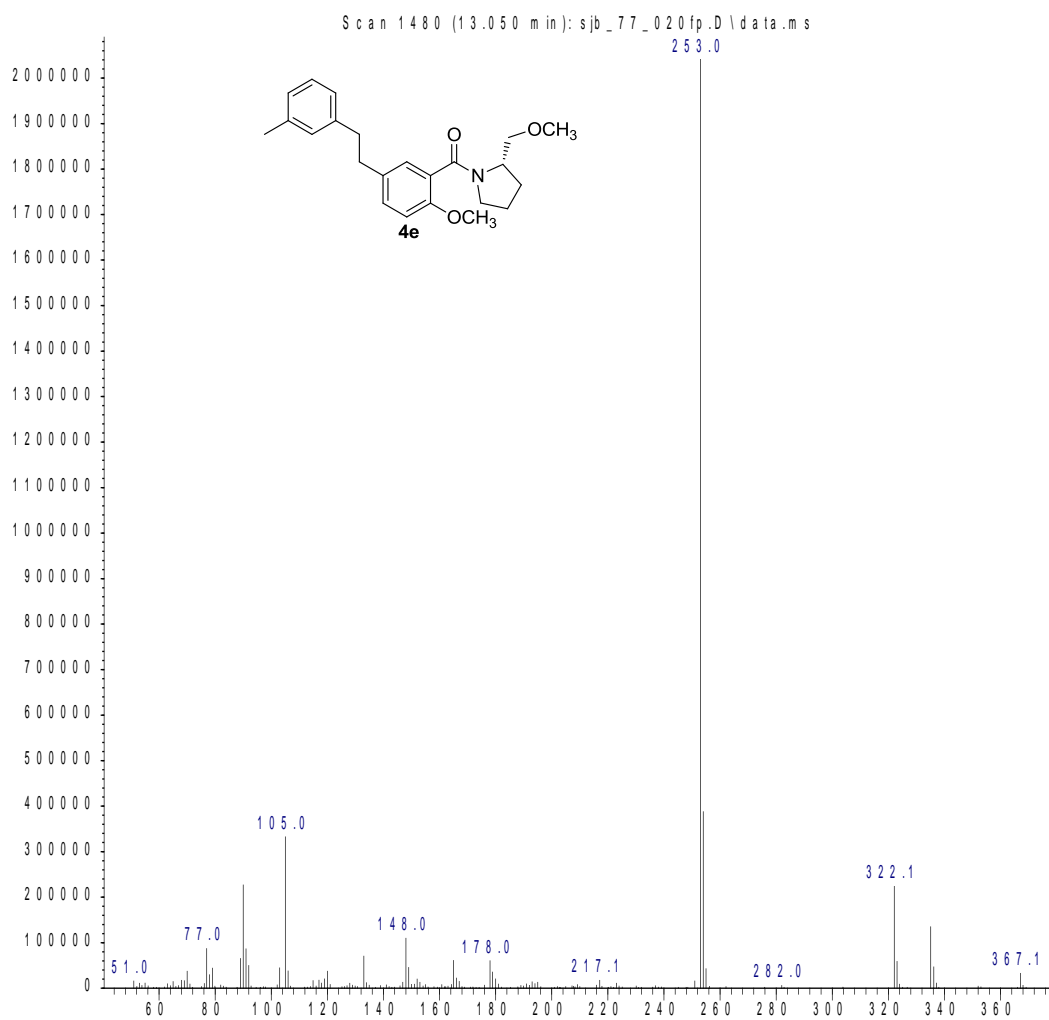

m/z-->

Abundance

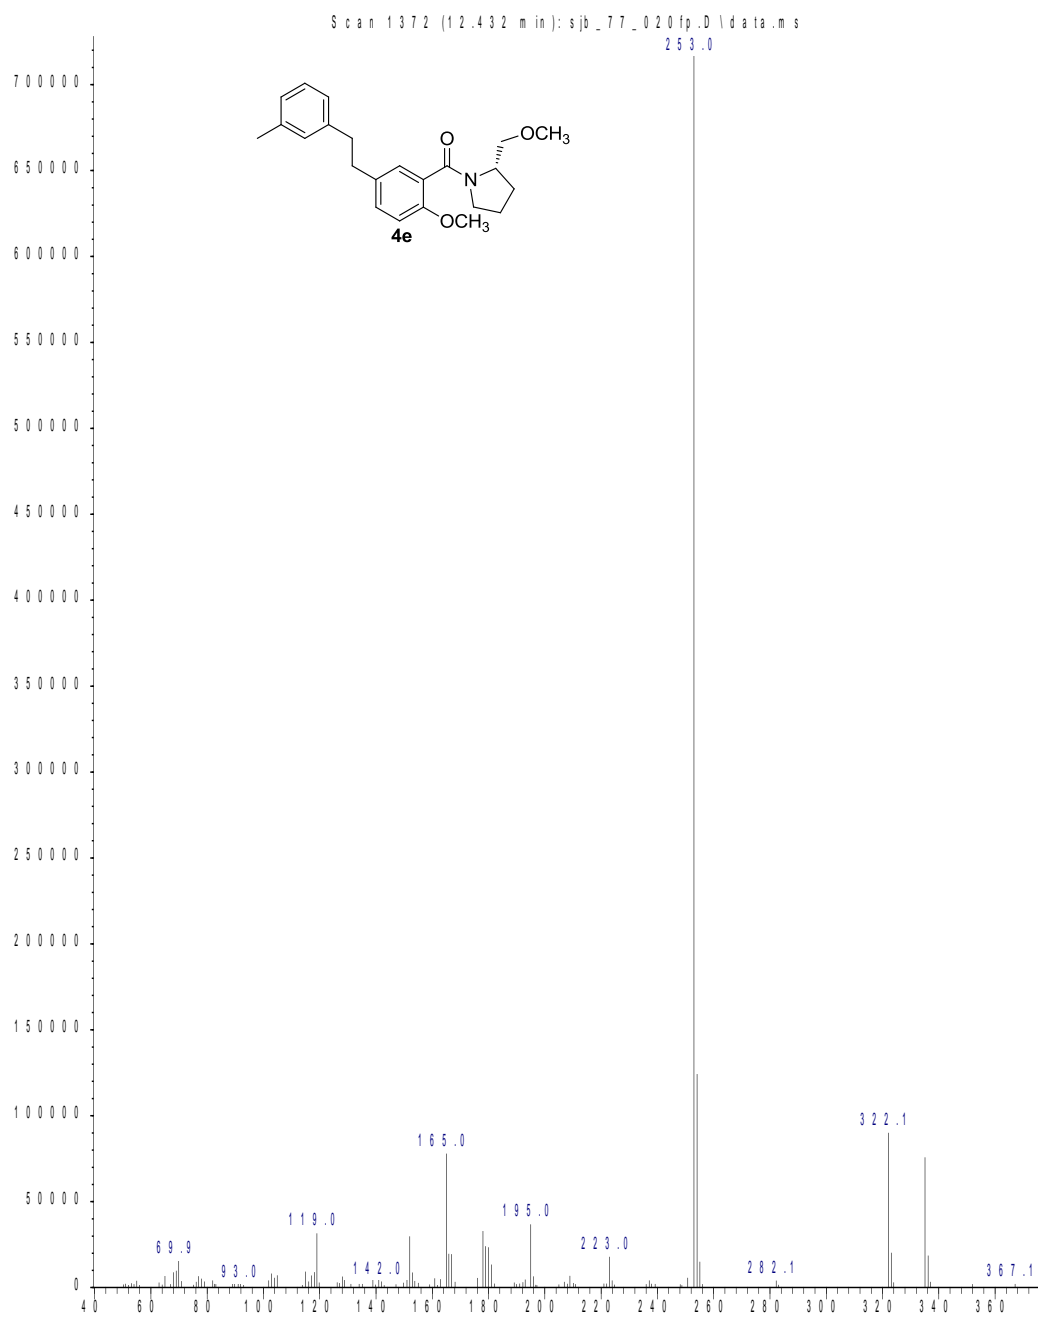

m/z-->

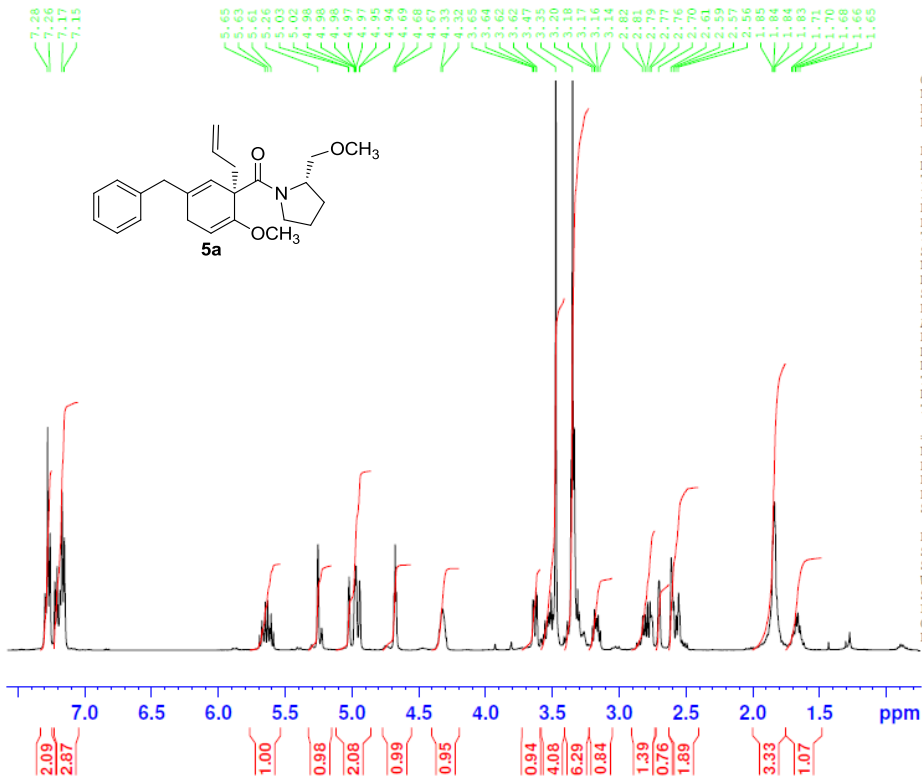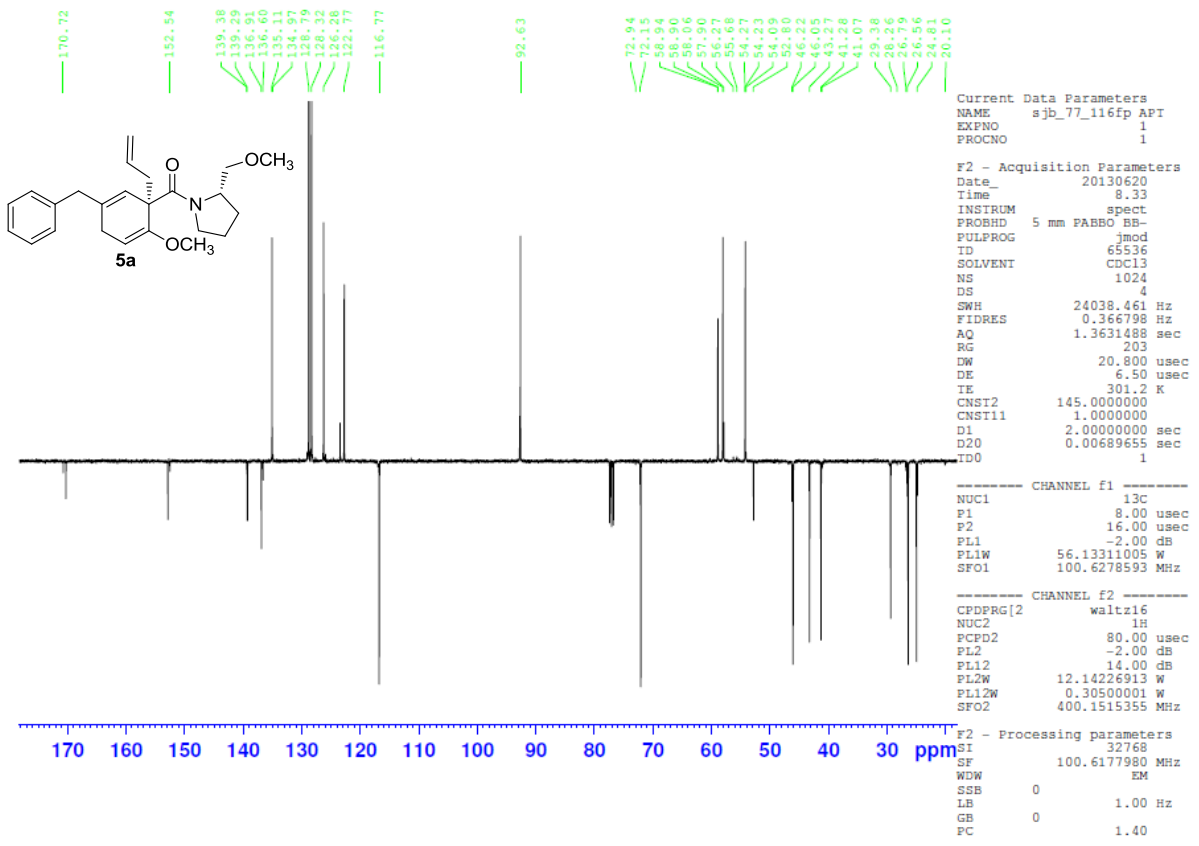



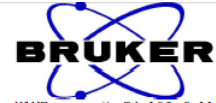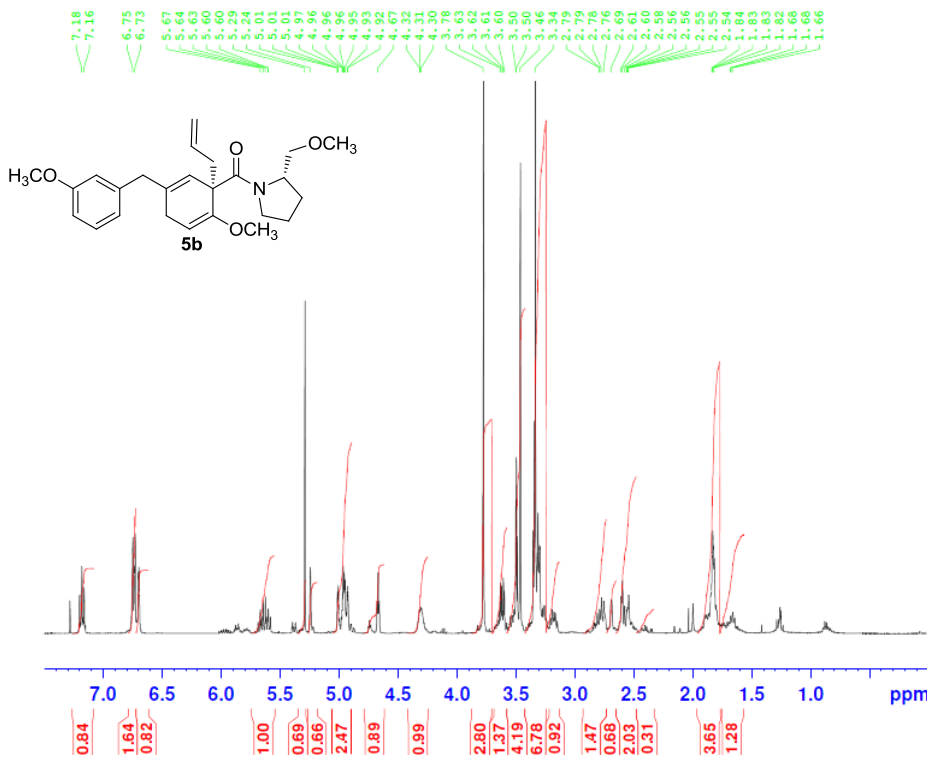

```
NAME sjb_74_152 fr11-19
EXPNO 1
PROCNO 1
Date_ 20121003
Time 9.37
INSTRUM spect
PROBHD 5 mm DUL 13C-1
PULPROG zg30
TD 65536
SOLVENT CDC13
NS 16
DS 2
SWH 8223.685 Hz
FIDRES 0.125483 Hz
AQ 3.9846387 sec
RG 36
DW 60.800 usec
DE 6.50 usec
TE 301.2 K
D1 1.0000000 sec
TDO 1
```

```
===== CHANNEL f1 =====
NUC1 1H
P1 9.80 usec
PL1 -4.00 dB
PLW 19.24419975 W
SFO1 400.1524711 MHz
SI 32768
SF 400.1500000 MHz
WDW EM
SSB 0
LB 0.30 Hz
GB 0
PC 1.00
```

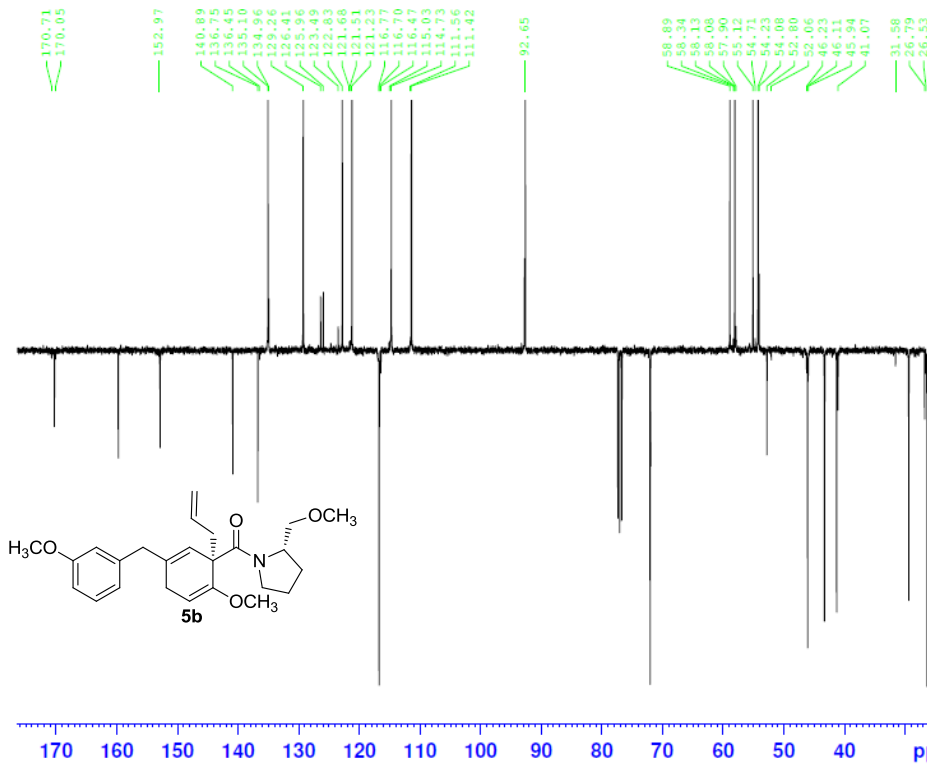

```
Current Data Parameters
NAME sjb_77_143fp APT
EXPNO 1
PROCNO 1
F2 - Acquisition Parameters
Date_ 20130711
Time 8.35
INSTRUM spect
PROBHD 5 mm PABBO BB-
PULPROG jmod
TD 65536
SOLVENT CDC13
NS 922
DS 4
SWH 24038.461 Hz
FIDRES 0.366798 Hz
AQ 1.3631488 sec
RG 203
PC 203
DW 20.800 usec
DE 6.50 usec
TE 301.2 K
CNST2 145.0000000
CNST1 1.0000000
D1 2.0000000 sec
D20 0.00689655 sec
TDO 1
```

```
===== CHANNEL f1 =====
NUC1 13C
P1 8.00 usec
P2 16.00 usec
PL1 -2.00 dB
PL12 14.00 dB
PL2W 12.14226913 W
PL12W 0.30500001 W
SFO1 100.6278593 MHz
===== CHANNEL f2 =====
CPDPRG2 waltz16
NUC2 1H
PCPD2 80.00 usec
PL2 -2.00 dB
PL12 14.00 dB
PL2W 12.14226913 W
PL12W 0.30500001 W
SFO2 400.1515172 MHz
```

```
F2 - Processing parameters
SI 32768
SF 100.6177980 MHz
WDW EM
SSB 0
LB 1.00 Hz
GB 0
PC 1.40
```

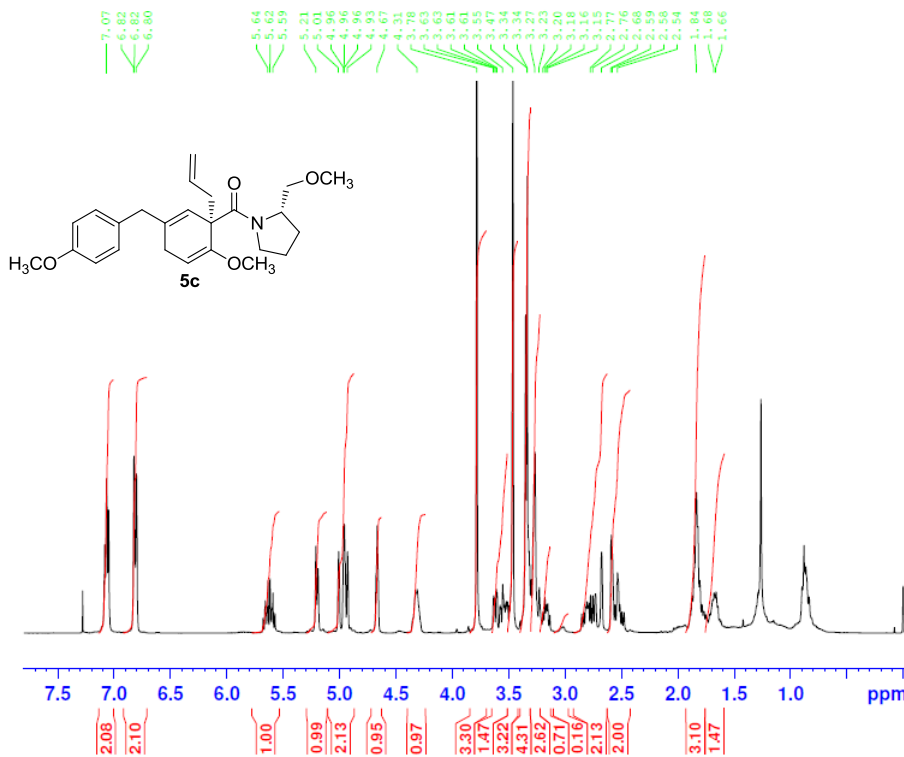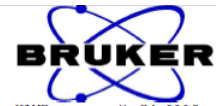

```

NAME      sjb_74_009fp
EXPNO     1
PROCNO    1
Date_     20120531
Time      16.05
INSTRUM   spect
PROBHD    5 mm PABBO BB-
PULPROG   zg30
TD         65536
SOLVENT   CDC13
NS         16
DS         2
SWH        8223.685 Hz
FIDRES     0.125483 Hz
AQ         3.9846387 sec
RG         32
DW         60.800 usec
DE         6.50 usec
TE         301.2 K
D1         1.00000000 sec
TDO        1
  
```

```

===== CHANNEL f1 =====
NUC1      1H
P1        12.50 usec
PL1       -2.00 dB
PL1W      12.14226913 W
SF01      400.1524711 MHz
SI         32768
SF         400.1500000 MHz
WDW        EM
SSB        0
LB         0.30 Hz
GB         0
PC         1.00
  
```

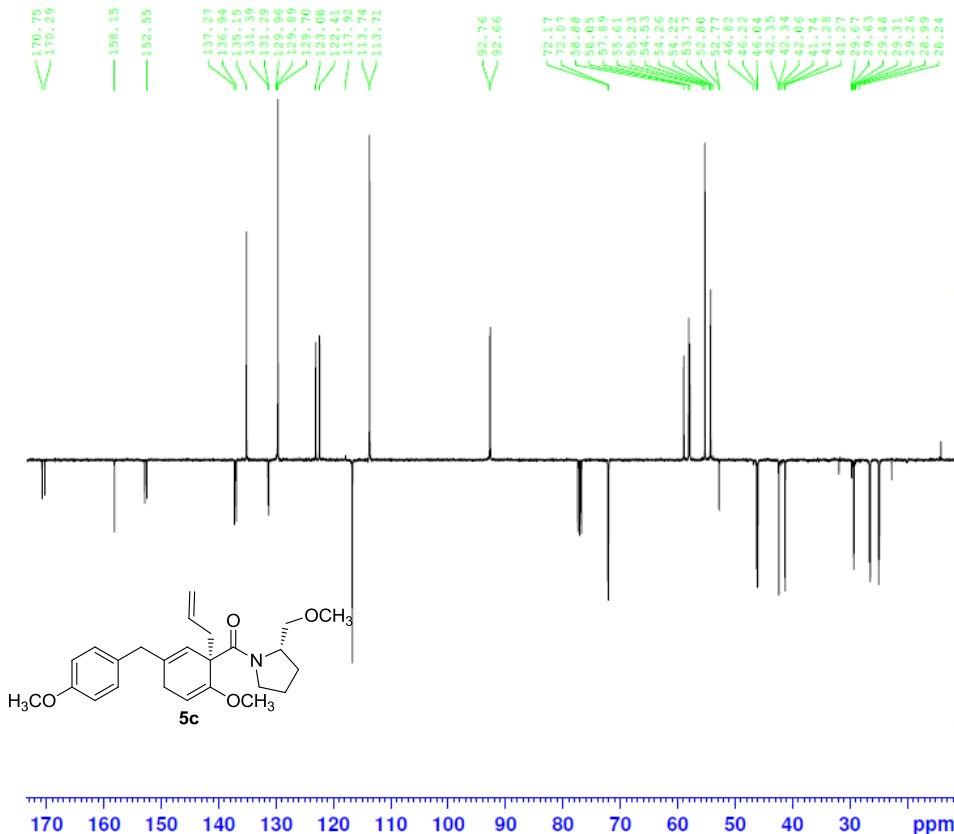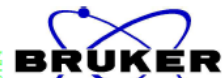

```

NAME      sjb_74_218fp 13CAPT
EXPNO     1
PROCNO    1
Date_     20121206
Time      12.49
INSTRUM   spect
PROBHD    5 mm PABBO BB-
PULPROG   jmod
TD         65536
SOLVENT   CDC13
NS         1024
DS         4
SWH        18115.941 Hz
FIDRES     0.276427 Hz
AQ         1.8088436 sec
RG         203
DW         27.600 usec
DE         6.50 usec
TE         301.2 K
CNST2     145.0000000
CNST11    1.0000000
D1         2.00000000 sec
D20        0.00689655 sec
TDO        1
  
```

```

===== CHANNEL f1 =====
NUC1      13C
P1         8.00 usec
P2        16.00 usec
PL1       -2.00 dB
PL1W      56.13311005 W
SF01      100.6265472 MHz

===== CHANNEL f2 =====
CPDPRG2   waltz16
NUC2      1H
PCPD2     80.00 usec
PL2       -2.00 dB
PL12      14.00 dB
PL2W      12.14226913 W
PL12W     0.30500001 W
SF02      400.1515072 MHz
SI         32768
SF         100.6177980 MHz
WDW        EM
SSB        0
LB         1.00 Hz
GB         0
PC         1.40
  
```

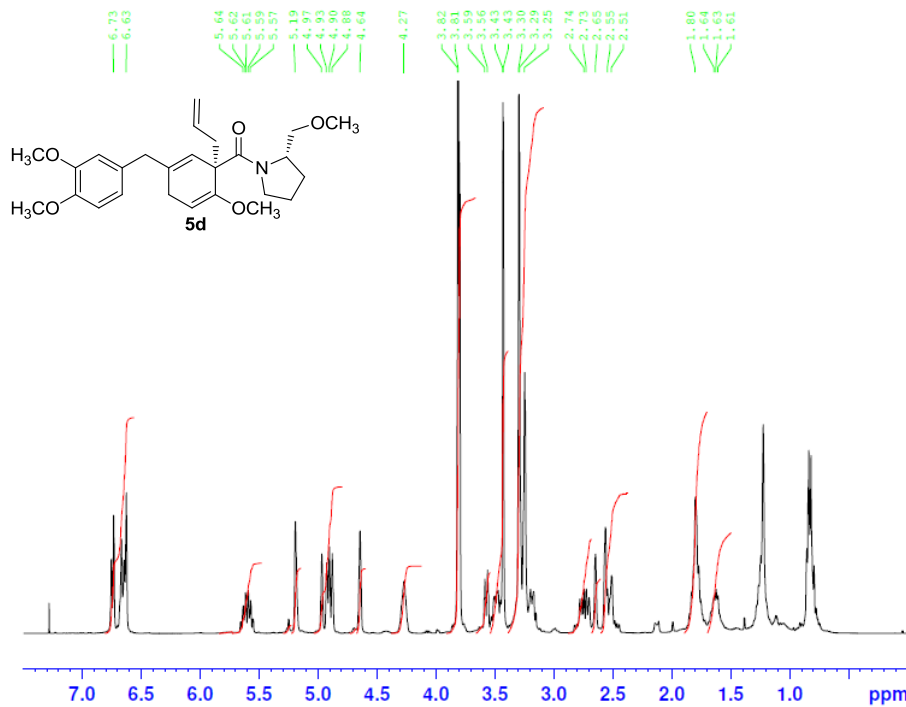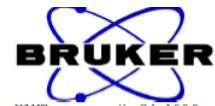

```

NAME      sjb_74_153fp
EXPNO     1
PROCNO    1
Date_     20121002
Time      16.06
INSTRUM   spect
PROBHD    5 mm DUL 13C-1
PULPROG   zg30
TD         65536
SOLVENT   CDCl3
NS         16
DS         2
SWH       8223.685 Hz
FIDRES    0.125483 Hz
AQ         3.9846387 sec
RG         22.6
DW         60.800 usec
DE         6.50 usec
TE         301.2 K
D1         1.00000000 sec
TDO        1
  
```

```

===== CHANNEL f1 =====
NUC1      1H
P1         9.80 usec
PL1        -4.00 dB
PL1W      19.24419975 W
SFO1      400.1524711 MHz
SI         32768
SF         400.1500000 MHz
WDW        EM
SSB         0
LB         0.30 Hz
GB         0
PC         1.00
  
```

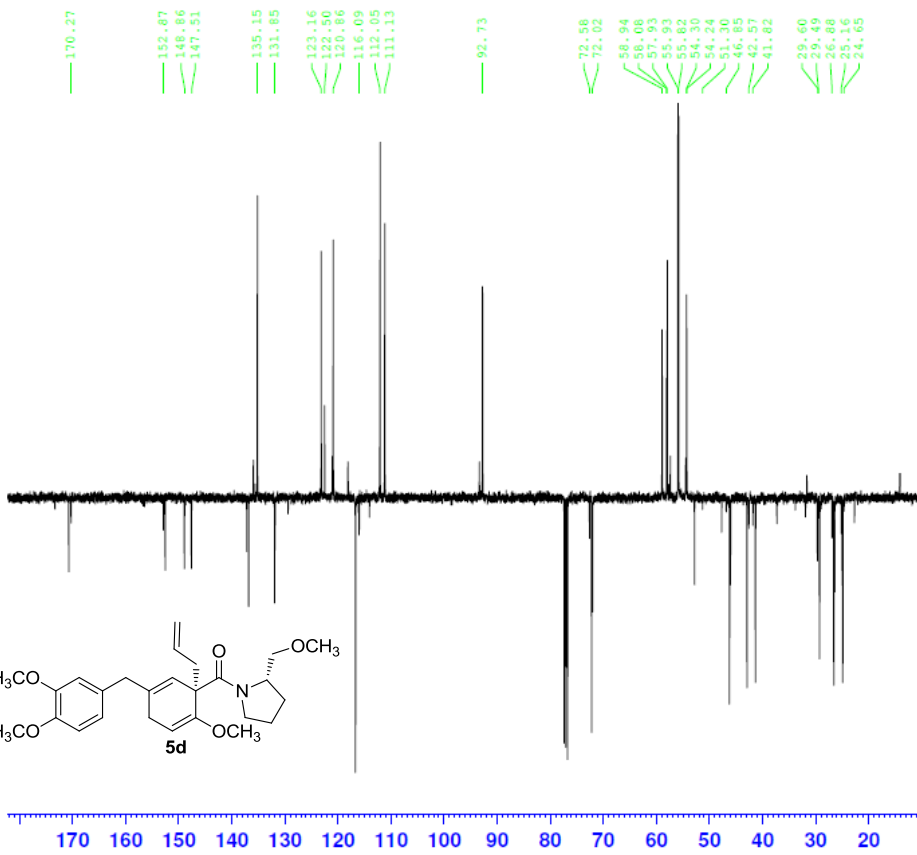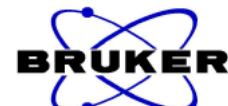

```

NAME      sjb_77_119fp APT
EXPNO     1
PROCNO    1
Date_     20130621
Time      8.47
INSTRUM   spect
PROBHD    5 mm PABBO BB-
PULPROG   jmod
TD         65536
SOLVENT   CDCl3
NS         1024
DS         4
SWH       24038.461 Hz
FIDRES    0.366798 Hz
AQ         1.3631988 sec
RG         203
DW         20.800 usec
DE         6.50 usec
TE         301.2 K
CNST2     145.0000000
CNST11    1.0000000
D1         2.00000000 sec
D20        0.00689655 sec
TDO        1
  
```

```

----- CHANNEL f1 -----
NUC1      13C
P1         8.00 usec
P2         16.00 usec
PL1        -2.00 dB
PL1W      56.13311005 W
SFO1      100.6278593 MHz
  
```

```

----- CHANNEL f2 -----
CPDPRG2   waltz16
NUC2      1H
PCPD2     80.00 usec
PL2        -2.00 dB
PL12      14.00 dB
PL12W     12.14226913 W
PL12W     0.30500001 W
SFO2      400.1514270 MHz
SI         32768
SF         100.6177980 MHz
WDW        EM
SSB         0
LB         1.00 Hz
GB         0
PC         1.40
  
```

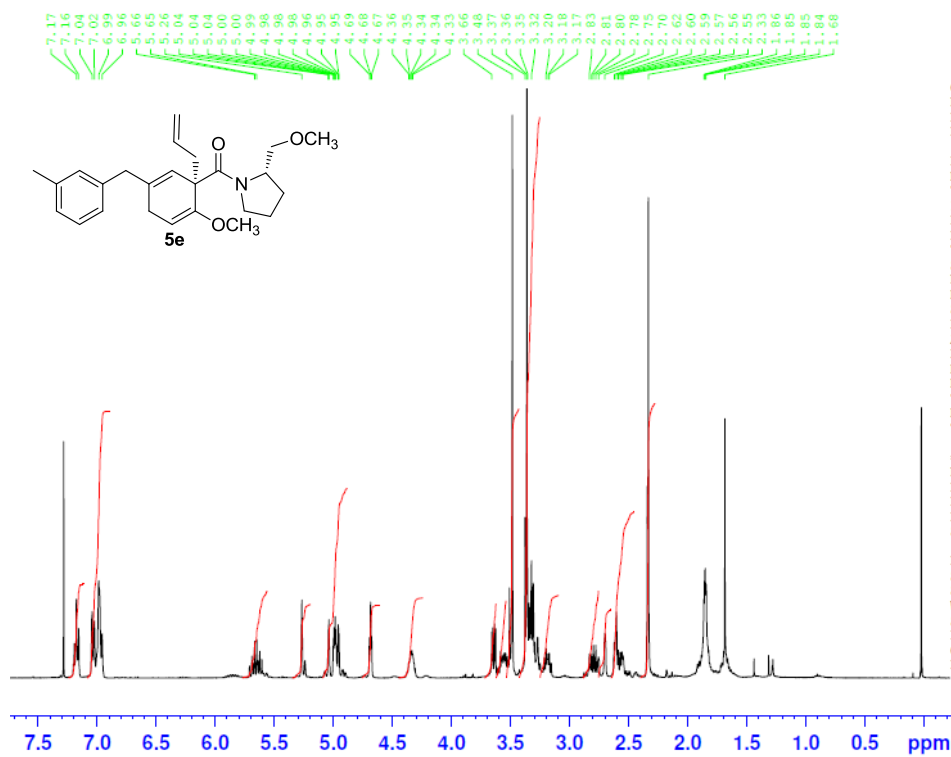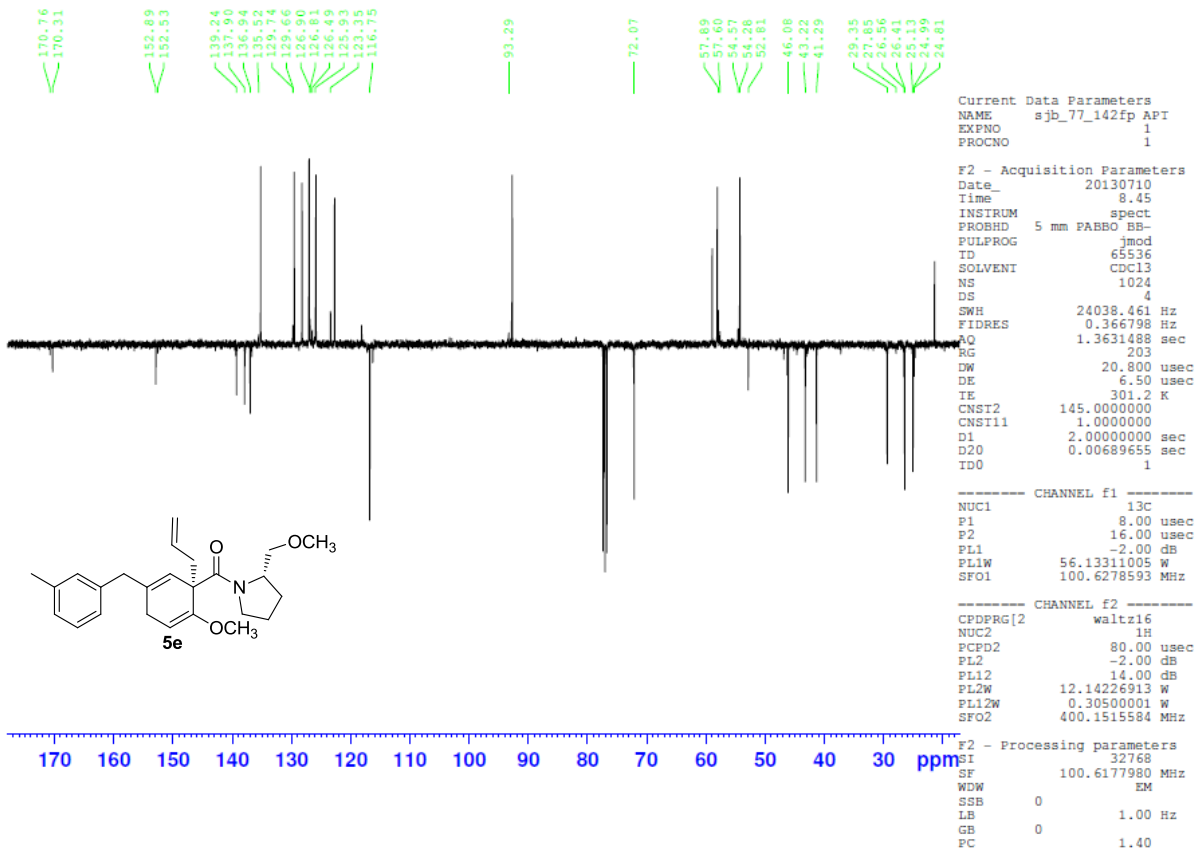



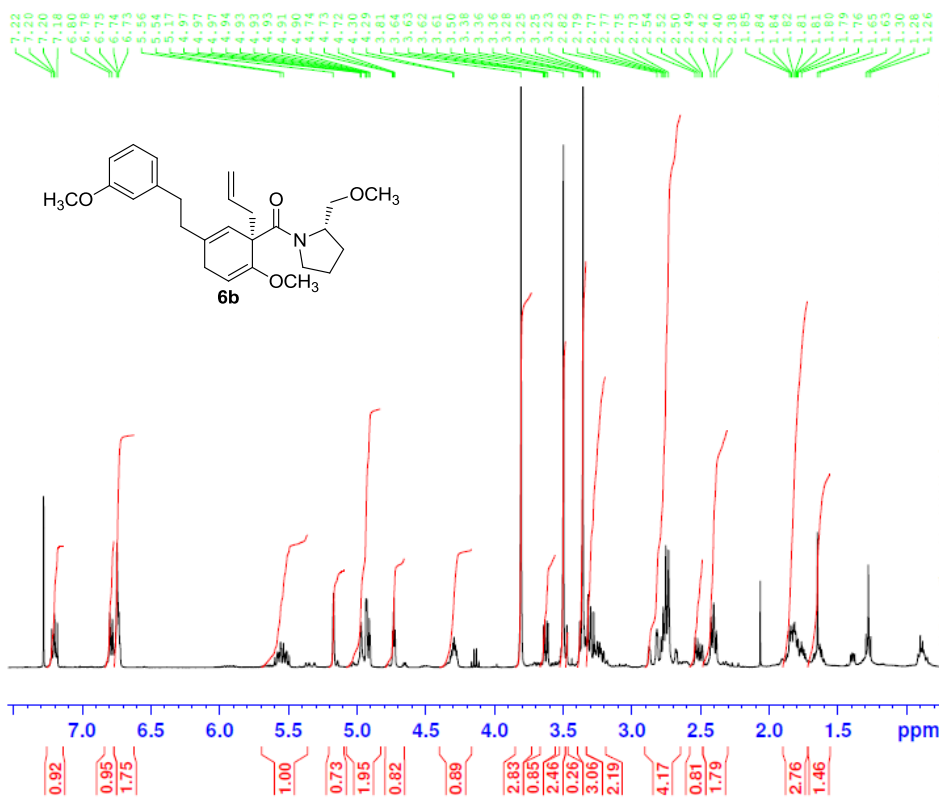

Current Data Parameters  
 NAME sjb\_81\_102fp  
 EXPNO 1  
 PROCNO 1

F2 - Acquisition Parameters  
 Date\_ 20140214  
 Time 12.39  
 INSTRUM spect  
 PROBHD 5 mm PABBO BB-  
 PULPROG zg30  
 TD 65536  
 SOLVENT CDCl3  
 NS 16  
 DS 2  
 SWH 8012.820 Hz  
 FIDRES 0.122266 Hz  
 AQ 4.0894465 sec  
 RG 128  
 DW 62.400 usec  
 DE 6.50 usec  
 TE 296.8 K  
 D1 1.0000000 sec  
 TDO 1

----- CHANNEL f1 -----  
 SFO1 400.1524711 MHz  
 NUC1 1H  
 P1 12.50 usec  
 PLW1 12.14200020 W

F2 - Processing parameters  
 SI 65536  
 SF 400.1500000 MHz  
 WDW EM  
 SSB 0  
 LB 0.30 Hz  
 GB 0  
 PC 1.00

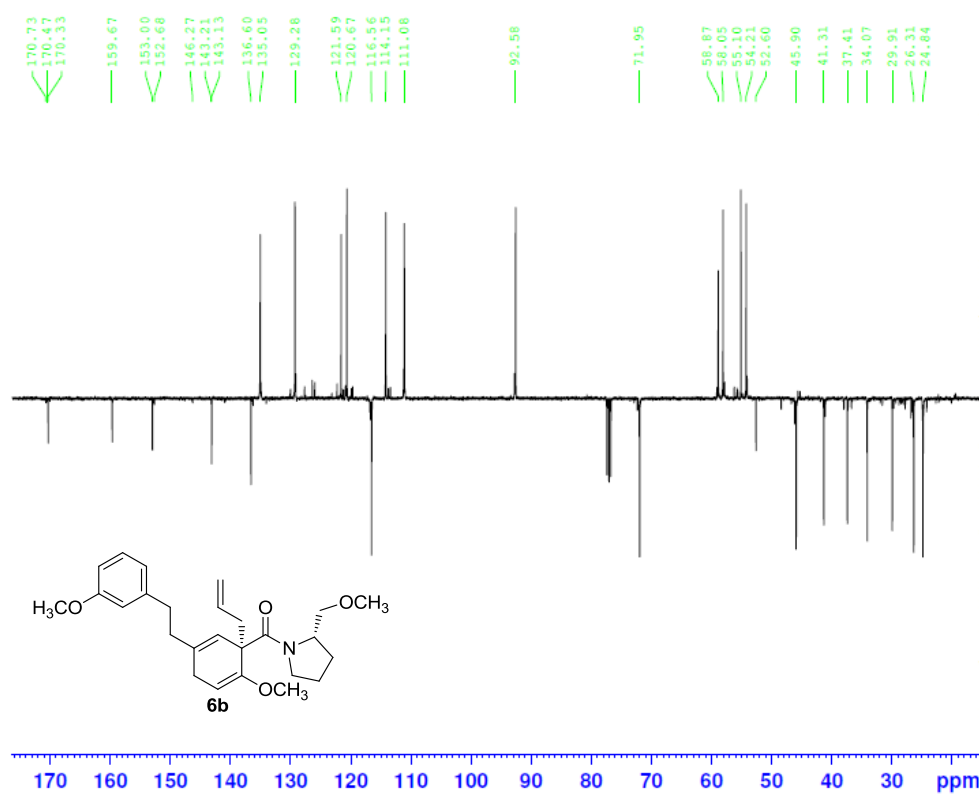

Current Data Parameters  
 NAME sjb\_81\_Birch 666 m methoxy  
 EXPNO 1  
 PROCNO 1

F2 - Acquisition Parameters  
 Date\_ 20140510  
 Time 14.31  
 INSTRUM spect  
 PROBHD 5 mm PABBO BB-  
 PULPROG smod  
 TD 65536  
 SOLVENT CDCl3  
 NS 1024  
 DS 4  
 SWH 24038.461 Hz  
 FIDRES 0.366798 Hz  
 AQ 1.3631488 sec  
 RG 203  
 DW 20.800 usec  
 DE 6.50 usec  
 TE 301.2 K  
 CNST2 145.0000000  
 CNST11 1.0000000  
 D1 2.0000000 sec  
 D20 0.00689655 sec  
 TDO 1

===== CHANNEL f1 =====  
 SFO1 100.6298721 MHz  
 NUC1 13C  
 P1 8.00 usec  
 P2 16.00 usec  
 PLW1 56.13299942 W

===== CHANNEL f2 =====  
 SFO2 400.1516006 MHz  
 NUC2 1H  
 CPDPRG2 waltz16  
 PCPD2 90.00 usec  
 PLW2 12.14200020 W  
 PLW12 0.24369000 W

F2 - Processing parameters  
 SI 32768  
 SF 100.6177980 MHz  
 WDW EM  
 SSB 0  
 LB 1.00 Hz  
 GB 0  
 PC 1.40

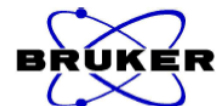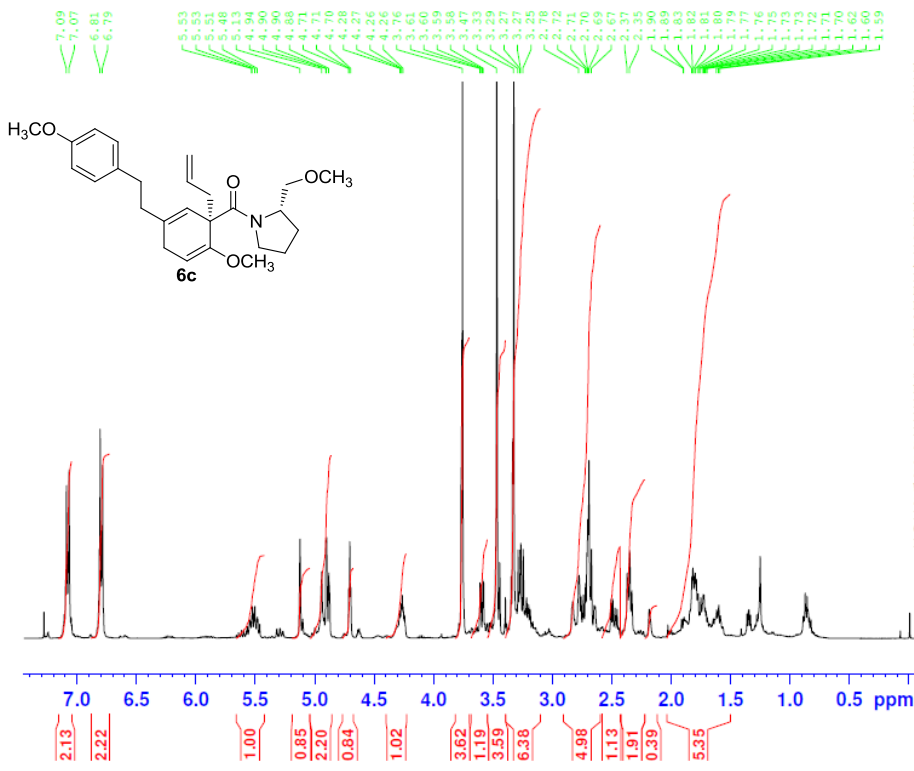

```

NAME ra_67_143pure
EXPNO 1
PROCNO 1
Date_ 20120711
Time 11.46
INSTRUM spect
PROBHD 5 mm PABBO BB-
PULPROG zg30
TD 65536
SOLVENT CDC13
NS 16
DS 2
SWH 8223.685 Hz
FIDRES 0.125483 Hz
AQ 3.9846387 sec
RG 25.4
DW 60.800 usec
DE 6.50 usec
TE 295.0 K
D1 1.00000000 sec
TD0 1

===== CHANNEL f1 =====
NUC1 1H
P1 12.50 usec
PL1 -2.00 dB
PL1W 12.14226913 W
SFO1 400.1524711 MHz
SI 32768
SF 400.1500000 MHz
WDW EM
SSB 0
LB 0.30 Hz
GB 0
PC 1.00
  
```

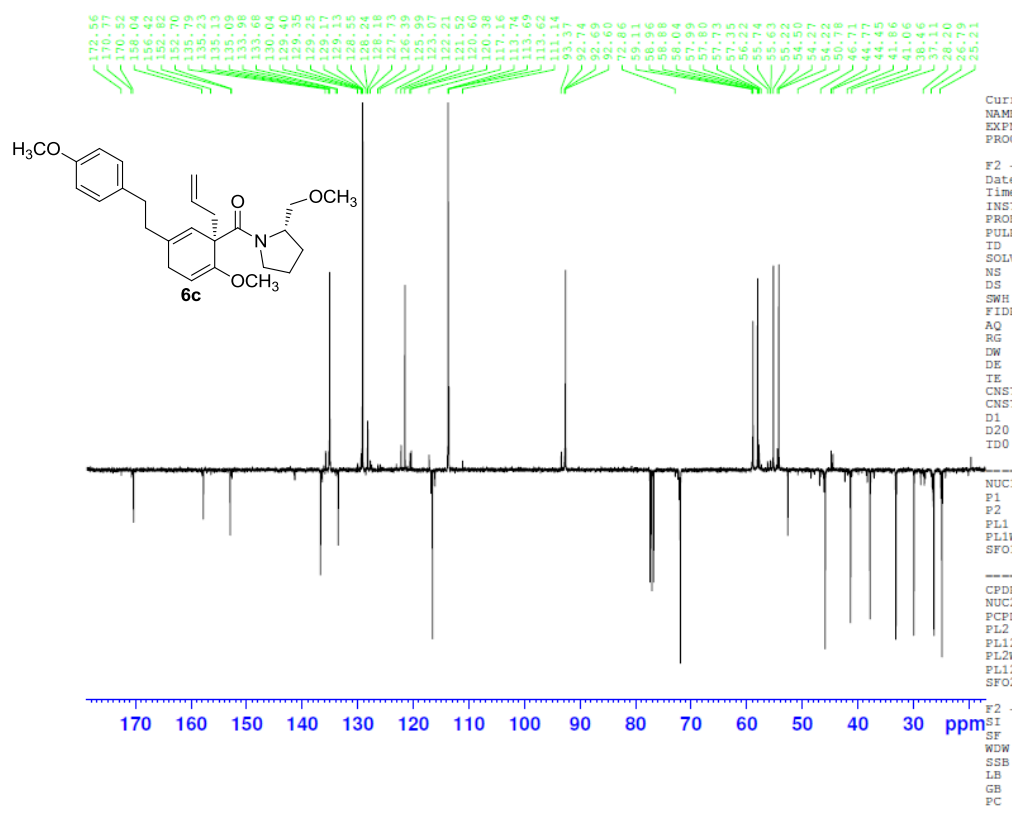

```

Current Data Parameters
NAME sjb_77_220fp AP1
EXPNO 1
PROCNO 1

F2 - Acquisition Parameters
Date_ 20130924
Time 16.29
INSTRUM spect
PROBHD 5 mm PABBO BB-
PULPROG 1mod
TD 65536
SOLVENT CDC13
NS 1024
DS 4
SWH 24038.461 Hz
FIDRES 0.366798 Hz
AQ 1.3631488 sec
RG 203
DW 20.800 usec
DE 6.50 usec
TE 298.2 K
CNST2 145.000000
CNST11 1.000000
D1 2.00000000 sec
D20 0.00689655 sec
TD0 1

===== CHANNEL f1 =====
NUC1 13C
P1 8.00 usec
P2 16.00 usec
PL1 -2.00 dB
PL1W 56.13311005 W
SFO1 100.6278593 MHz

===== CHANNEL f2 =====
CPDPRG2 waltz16
NUC2 1H
PCPD2 75.00 usec
PL2 -2.00 dB
PL12 13.39 dB
PL2W 12.14226913 W
PL12W 0.35099408 W
SFO2 400.1515013 MHz

F2 - Processing parameters
SI 32768
SF 100.6177980 MHz
WDW EM
SSB 0
LB 1.00 Hz
GB 0
PC 1.40
  
```

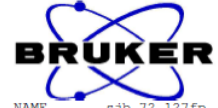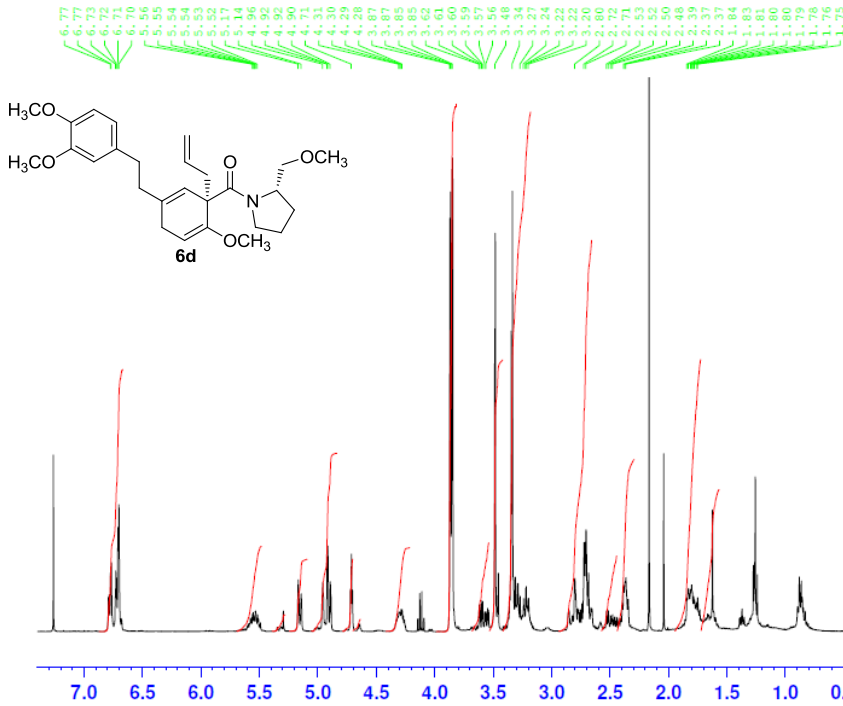

```
NAME      sjb_72_127fp
EXPNO     1
PROCNO    1
Date_     20120220
Time      18.03
INSTRUM   spect
PROBHD    5 mm PABBO BB-
PULPROG   zg30
TD         65536
SOLVENT   CDCl3
NS         16
DS         2
SWH        8223.685 Hz
FIDRES     0.125483 Hz
AQ         3.9846387 sec
RG         144
DW         60.800 usec
DE         6.50 usec
TE         301.2 K
D1         1.00000000 sec
TDO        1
```

```
===== CHANNEL f1 =====
NUC1       1H
P1         12.50 usec
PL1        -2.00 dB
PL1W       12.14226913 W
SF01       400.1524711 MHz
SI         32768
SF         400.1500066 MHz
WDW        EM
SSB        0
LB         0.30 Hz
GB         0
PC         1.00
```

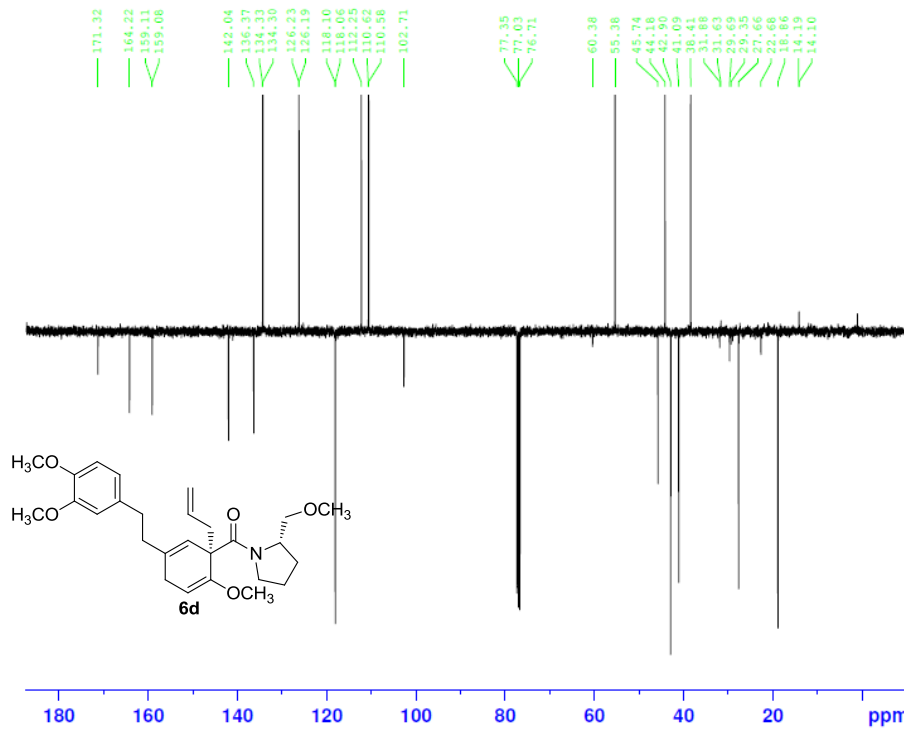

```
Current Data Parameters
NAME      sjb_74_174fp 13CAPT
EXPNO     1
PROCNO    1
```

```
F2 - Acquisition Parameters
Date_     20121017
Time      9.19
INSTRUM   spect
PROBHD    5 mm DUL 13C-1
PULPROG   jmod
ID         65536
SOLVENT   CDCl3
NS         1024
DS         4
SWH        20161.291 Hz
FIDRES     0.307637 Hz
AQ         1.6252928 sec
RG         203
DW         24.800 usec
DE         6.50 usec
TE         301.2 K
CNSI2     145.0000000
CNSI11    1.0000000
D1         2.00000000 sec
D20       0.00689655 sec
TDO        1
```

```
----- CHANNEL f1 -----
NUC1       13C
P1         9.00 usec
P2         18.00 usec
PL1        0 dB
PL1W       35.41759872 W
SF01       100.6268310 MHz
```

```
----- CHANNEL f2 -----
CPDPRG2   waltz16
NUC2       1H
PCPD2     80.00 usec
PL2        -3.80 dB
PL12       13.80 dB
PL2W       18.37806702 W
PL12W     0.31937420 W
SF02       400.1514625 MHz
```

```
F2 - Processing parameters
SI         32768
SF         100.6177980 MHz
WDW        EM
SSB        0
LB         1.00 Hz
GB         0
PC         1.40
```



## Analysis of stereoselectivity in the Birch reduction-allylation of 4d

### 1. Enantioselective reaction (LC trace of UV detector reading)

Data File C:\CHEM32\1\DATA\SJB\_81\_086CM.D

Sample Name: sjb\_81\_086cm

```
=====
Acq. Operator   : SYSTEM
Acq. Instrument : HPLC
Injection Date  : 1/17/2014 12:22:33 PM
Location        : Vial 1
Inj Volume     : Manually
Method         : C:\CHEM32\1\METHODS\HILIC1.M
Last changed   : 1/17/2014 12:20:27 PM by SYSTEM
                (modified after loading)
Sample Info    : sjb_81_086 crude in 85:15 Hexanes:IPA run in 85:15 Hexanes:IPA at 0.250 mL
                /min for 25 min.
```

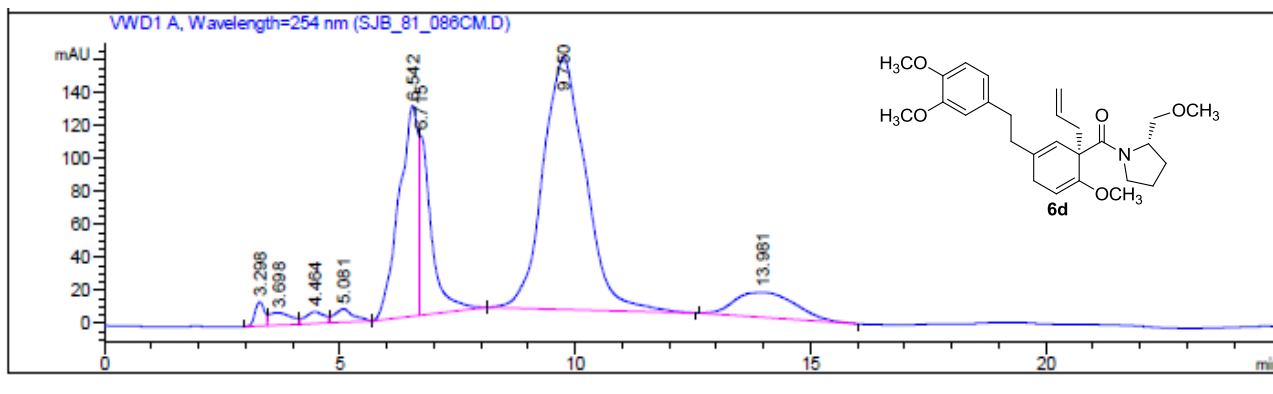

Signal 2: WVD1 A, Wavelength=254 nm

| Peak # | RetTime [min] | Type | Width [min] | Area [mAU*s] | Height [mAU] | Area %  |
|--------|---------------|------|-------------|--------------|--------------|---------|
| 1      | 3.298         | BV   | 0.2191      | 203.46292    | 14.49135     | 1.1677  |
| 2      | 3.698         | VV   | 0.4577      | 243.59489    | 7.32784      | 1.3980  |
| 3      | 4.464         | VV   | 0.3829      | 197.91856    | 7.17767      | 1.1359  |
| 4      | 5.081         | VB   | 0.4071      | 224.77737    | 7.94808      | 1.2900  |
| 5      | 6.542         | BV   | 0.3841      | 3654.93994   | 128.00078    | 20.9763 |
| 6      | 6.715         | VB   | 0.2498      | 1885.33069   | 109.02492    | 10.8202 |
| 7      | 9.750         | BB   | 0.9449      | 9656.28906   | 152.91478    | 55.4191 |
| 8      | 13.981        | BB   | 1.2294      | 1357.81055   | 14.95760     | 7.7927  |

Totals : 1.74241e4 441.84302

## 2. Non-enantioselective (LC trace of UV detector reading)

Data File C:\CHEM32\1\DATA\SJB\_81\_087CM.D

Sample Name: sjb\_81\_087cm

```
=====
Acq. Operator   : SYSTEM
Acq. Instrument : HPLC
Injection Date  : 1/17/2014 3:35:52 PM
Location        : Vial 1
Inj Volume     : Manually

Method         : C:\CHEM32\1\METHODS\HILIC1.M
Last changed   : 1/17/2014 12:20:27 PM by SYSTEM
                (modified after loading)
Sample Info    : sjb_81_087cm in 85:15 Hexanes:IPA run in 85:15 Hexanes:IPA at 0.250 mL/min
                for 25 min.
```

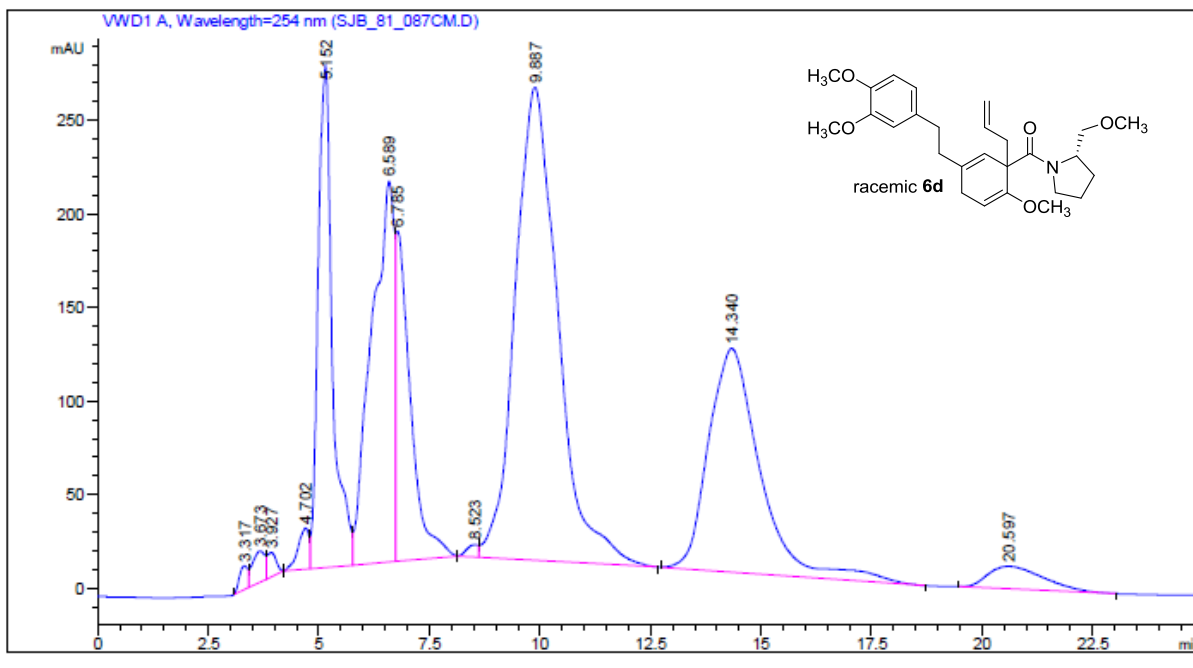

=====  
 Area Percent Report  
 =====

Sorted By : Signal  
 Multiplier : 1.0000  
 Dilution : 1.0000  
 Use Multiplier & Dilution Factor with ISTDs

Signal 1: VWD1 A, Wavelength=254 nm

| Peak # | RetTime [min] | Type | Width [min] | Area [mAU*s] | Height [mAU] | Area %  |
|--------|---------------|------|-------------|--------------|--------------|---------|
| 1      | 3.317         | BV   | 0.2026      | 161.71326    | 12.68614     | 0.3488  |
| 2      | 3.673         | VV   | 0.2997      | 329.34979    | 16.61233     | 0.7104  |
| 3      | 3.927         | VB   | 0.2226      | 191.60265    | 12.91174     | 0.4133  |
| 4      | 4.702         | BV   | 0.2670      | 377.67203    | 22.03365     | 0.8146  |
| 5      | 5.152         | VV   | 0.3515      | 6101.32959   | 268.04456    | 13.1599 |
| 6      | 6.589         | VV   | 0.4678      | 7244.44189   | 203.48740    | 15.6255 |
| 7      | 6.785         | VB   | 0.3230      | 4046.57104   | 176.38852    | 8.7280  |
| 8      | 8.523         | BV   | 0.2815      | 114.57014    | 6.49611      | 0.2471  |
| 9      | 9.887         | VB   | 0.9084      | 1.70311e4    | 252.78012    | 36.7342 |
| 10     | 14.340        | BB   | 1.2435      | 9709.70996   | 119.50664    | 20.9428 |
| 11     | 20.597        | BB   | 1.2449      | 1055.00098   | 11.95725     | 2.2755  |

Totals : 4.63631e4 1102.90446

Peak explanation:

| retention time (min.) | Compound                                            |
|-----------------------|-----------------------------------------------------|
| 5.1                   | 1S enantiomer                                       |
| 6.5-6.7               | 1R enantiomer                                       |
| 9.8                   | gamma-alkylation product of Birch reduction         |
| 14                    | unreacted aromatic starting material                |
| 20.6                  | regioisomer of unreacted aromatic starting material |

Analysis: Enantioselective reaction shows a small amount of the 1S enantiomer, 1.29%. Therefore the enantioselectivity must be approximately 24:1 (31.8/1.29).

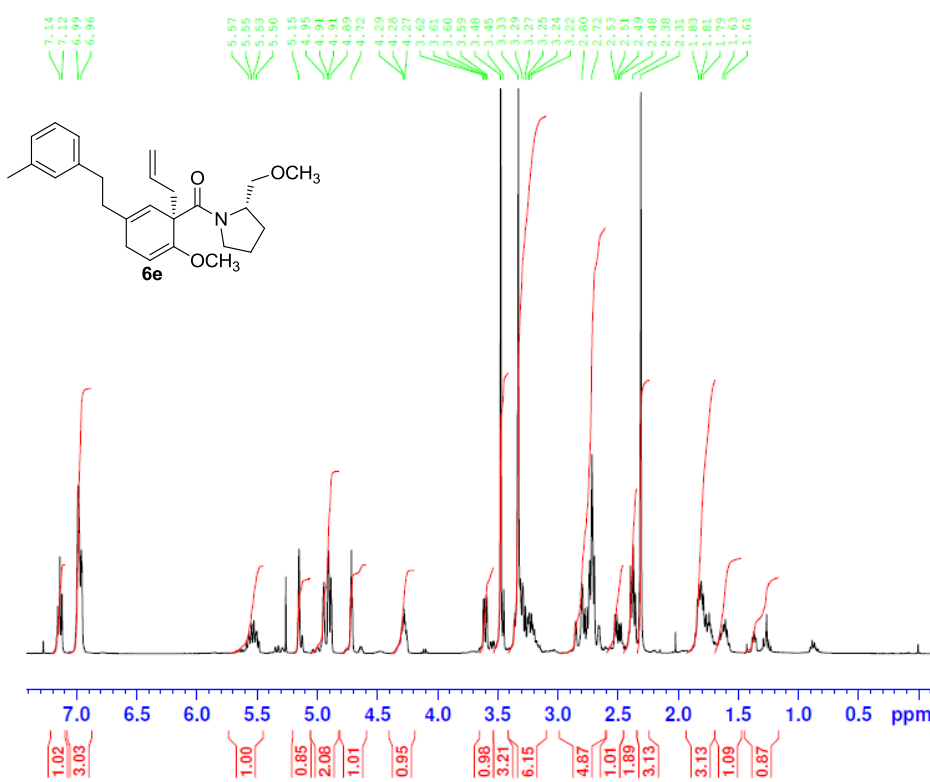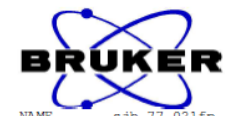

```

NAME      sjb_77_021fp
EXPNO     1
PROCNO    1
Date_     20130103
Time      12.28
INSTRUM   spect
PROBHD    5 mm PABBO BB-
PULPROG   zg30
TD         65536
SOLVENT   CDCl3
NS         16
DS         2
SWH       8223.685 Hz
FIDRES    0.125483 Hz
AQ         3.9846387 sec
RG         18
DW         60.800 usec
DE         6.50 usec
TE         301.9 K
D1         1.00000000 sec
TDO        1
  
```

```

===== CHANNEL f1 =====
NUC1      1H
P1        12.50 usec
PL1       -2.00 dB
PL1W      12.14226913 W
SFO1      400.1524711 MHz
SI         32768
SF         400.1500000 MHz
WDW        EM
SSB        0
LB         0.30 Hz
GB         0
PC         1.00
  
```

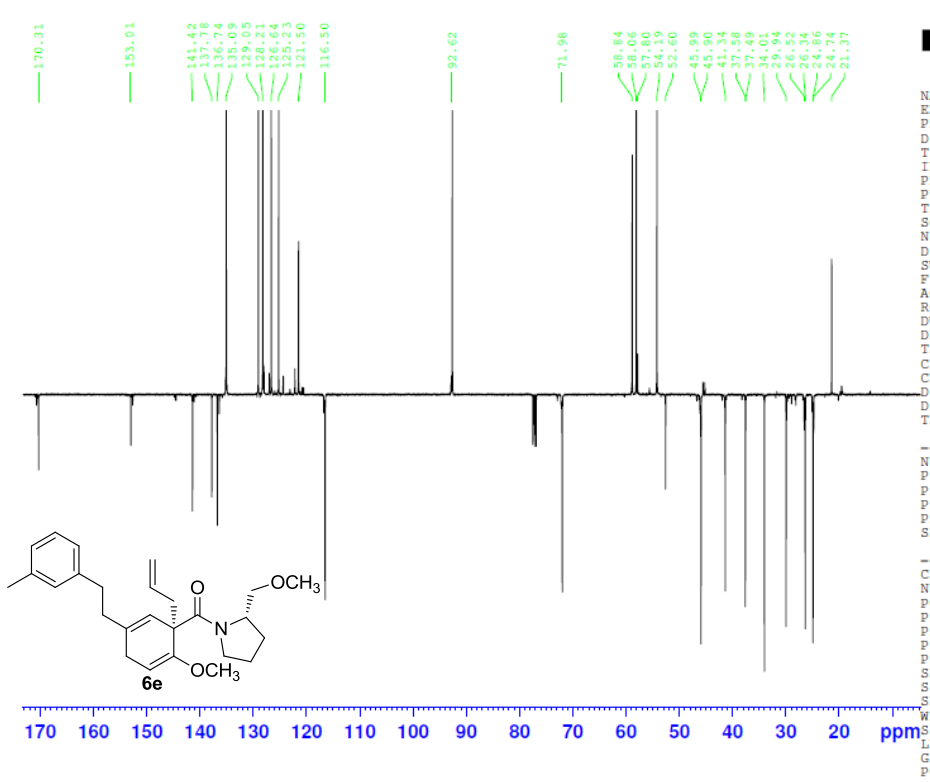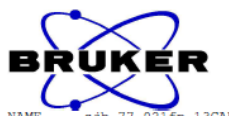

```

NAME      sjb_77_021fp 13CAPT
EXPNO     1
PROCNO    1
Date_     20130103
Time      15.21
INSTRUM   spect
PROBHD    5 mm PABBO BB-
PULPROG   jmod
TD         65536
SOLVENT   CDCl3
NS         1024
DS         4
SWH       17006.803 Hz
FIDRES    0.259503 Hz
AQ         1.9268084 sec
RG         203
DW         29.400 usec
DE         6.50 usec
TE         301.1 K
CNST2     145.0000000
CNST11    1.0000000
D1         2.00000000 sec
D20        0.00689655 sec
TDO        1
  
```

```

----- CHANNEL f1 -----
NUC1      13C
P1         8.00 usec
P2        16.00 usec
PL1       -2.00 dB
PL1W      56.13311005 W
SFO1      100.6267471 MHz
  
```

```

----- CHANNEL f2 -----
CPDPRG2   waltz16
NUC2      1H
PCPD2     80.00 usec
PL2       -2.00 dB
PL12      14.00 dB
PL2W      12.14226913 W
PL12W     0.30500000 W
SFO2      400.1514615 MHz
SI         32768
SF         100.6177980 MHz
WDW        EM
SSB        0
LB         1.00 Hz
GB         0
PC         1.40
  
```

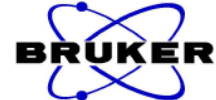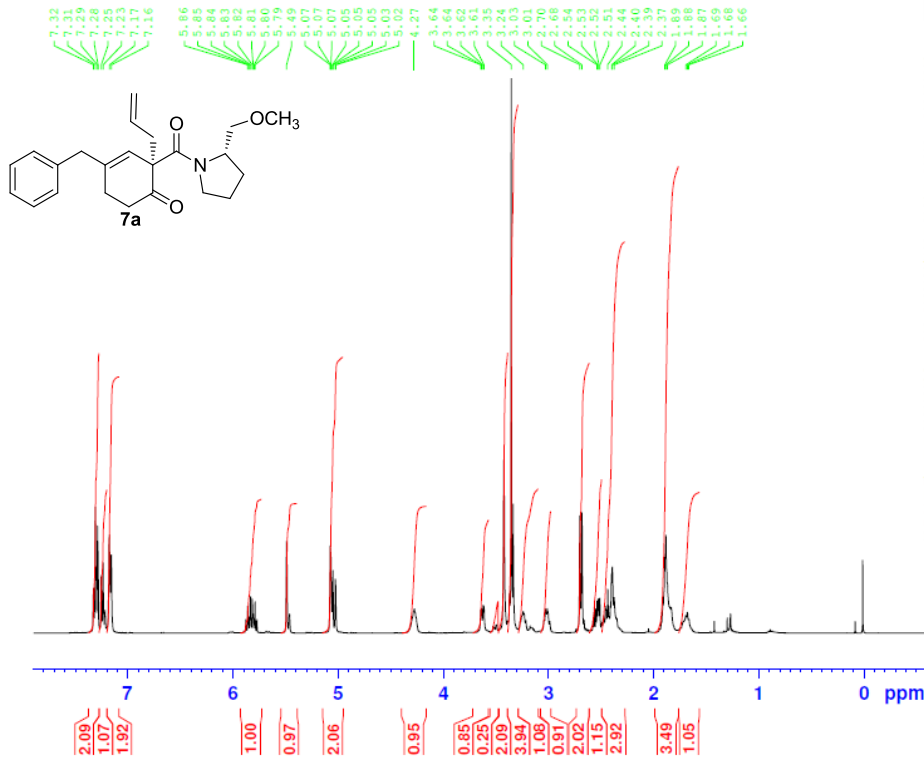

NAME sjb\_77\_120fp2  
EXPNO 1  
PROCNO 1  
Date\_ 20130625  
Time 9.02  
INSTRUM spect  
PROBHD 5 mm PABBO BB-  
PULPROG zg30  
TD 65536  
SOLVENT CDCl3  
NS 16  
DS 2  
SWH 8223.685 Hz  
FIDRES 0.125483 Hz  
AQ 3.9846387 sec  
RG 50.8  
DW 60.800 usec  
DE 6.50 usec  
TE 301.2 K  
D1 1.00000000 sec  
TDO 1

----- CHANNEL f1 -----  
NUC1 1H  
P1 12.50 usec  
PL1 -2.00 dB  
PL1W 12.14226913 W  
SFO1 400.1524711 MHz  
SI 32768  
SF 400.1500000 MHz  
WDW EM  
SSB 0  
LB 0.30 Hz  
GB 0  
PC 1.00

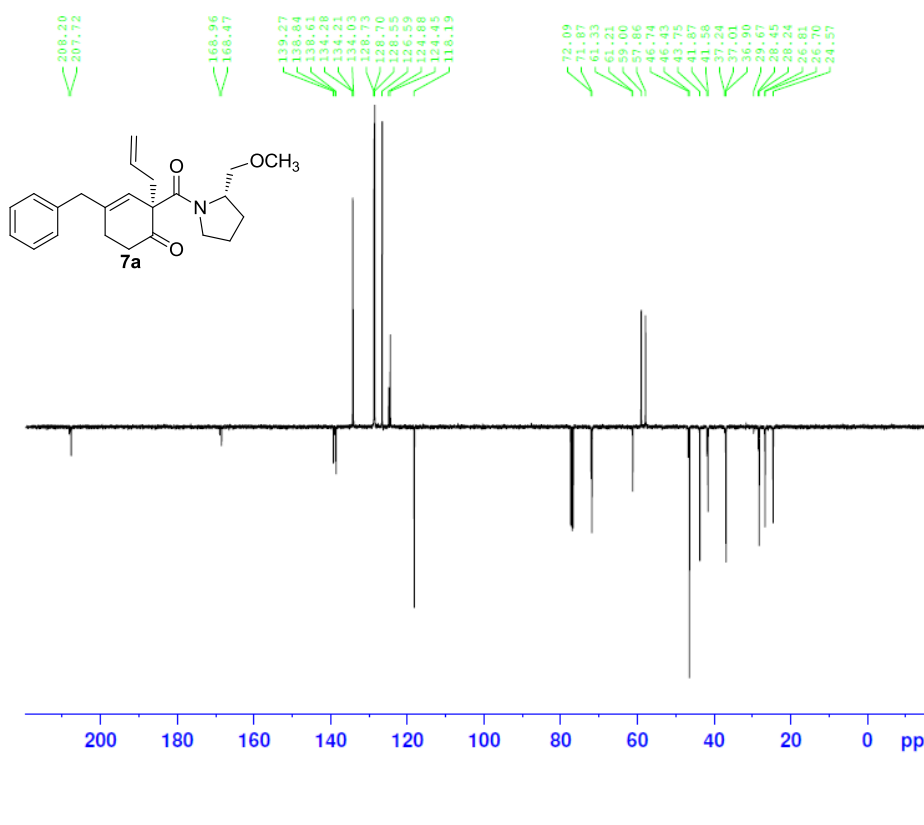

Current Data Parameters  
NAME sjb\_77\_120fp APT  
EXPNO 1  
PROCNO 1

F2 - Acquisition Parameters  
Date\_ 20130625  
Time 9.58  
INSTRUM spect  
PROBHD 5 mm PABBO BB-  
PULPROG jmod  
TD 65536  
SOLVENT CDCl3  
NS 1024  
DS 4  
SWH 24038.461 Hz  
FIDRES 0.366798 Hz  
AQ 1.3631488 sec  
RG 203  
DW 20.800 usec  
DE 6.50 usec  
TE 301.2 K  
CNST2 145.0000000  
CNST11 1.0000000  
D1 2.00000000 sec  
D20 0.00689655 sec  
TDO 1

----- CHANNEL f1 -----  
NUC1 13C  
P1 8.00 usec  
P2 16.00 usec  
PL1 -2.00 dB  
PL1W 56.13311005 W  
SFO1 100.6278593 MHz

----- CHANNEL f2 -----  
CPDPRG[2] waltz16  
NUC2 1H  
PCPD2 80.00 usec  
PL2 -2.00 dB  
PL12 14.00 dB  
PL2W 12.14226913 W  
PL12W 0.30500001 W  
SFO2 400.1515663 MHz

F2 - Processing parameters  
SI 32768  
SF 100.6177980 MHz  
WDW EM  
SSB 0  
LB 1.00 Hz  
GB 0  
PC 1.40

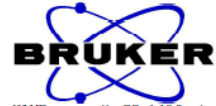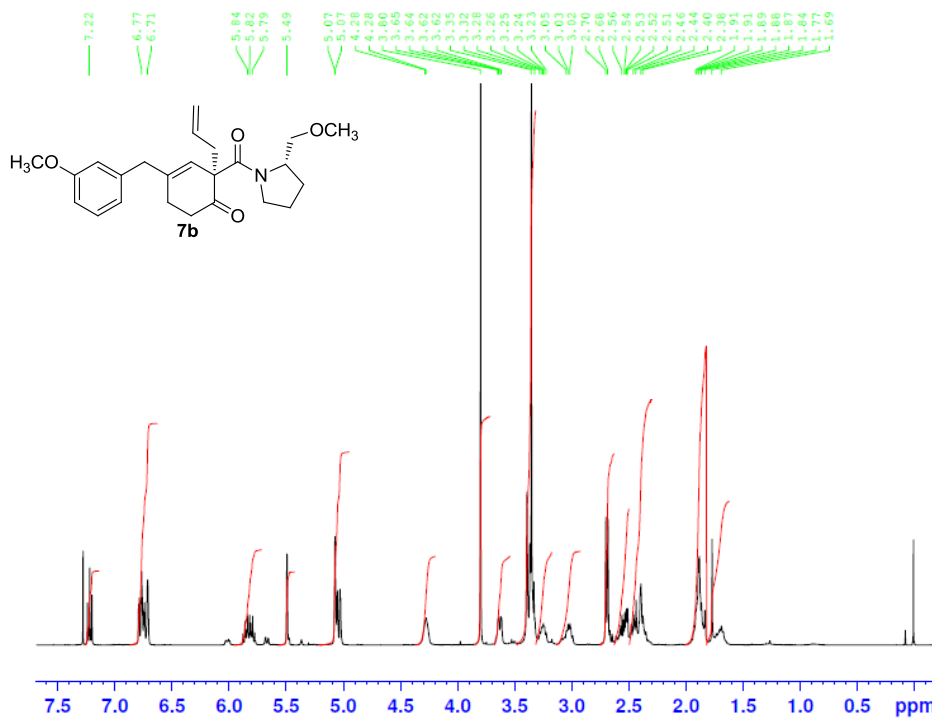

```

NAME      sjb_77_145fp take 2
EXPNO    1
PROCNO   1
Date_    20130717
Time     7.45
INSTRUM  spect
PROBHD   5 mm PABBO BB-
PULPROG  zg30
TD       65536
SOLVENT  CDCl3
NS       16
DS       2
SWH      8223.685 Hz
FIDRES   0.125483 Hz
AQ       3.9846387 sec
RG       101
DW       60.800 usec
DE       6.50 usec
TE       301.2 K
D1       1.00000000 sec
TDO      1
  
```

```

----- CHANNEL f1 -----
NUC1     1H
P1       12.50 usec
PL1      -2.00 dB
PL1W    12.14226913 W
SFO1     400.1524711 MHz
SI       32768
SF       400.1500000 MHz
WDW      EM
SSB      0
LB       0.30 Hz
GB       0
PC       1.00
  
```

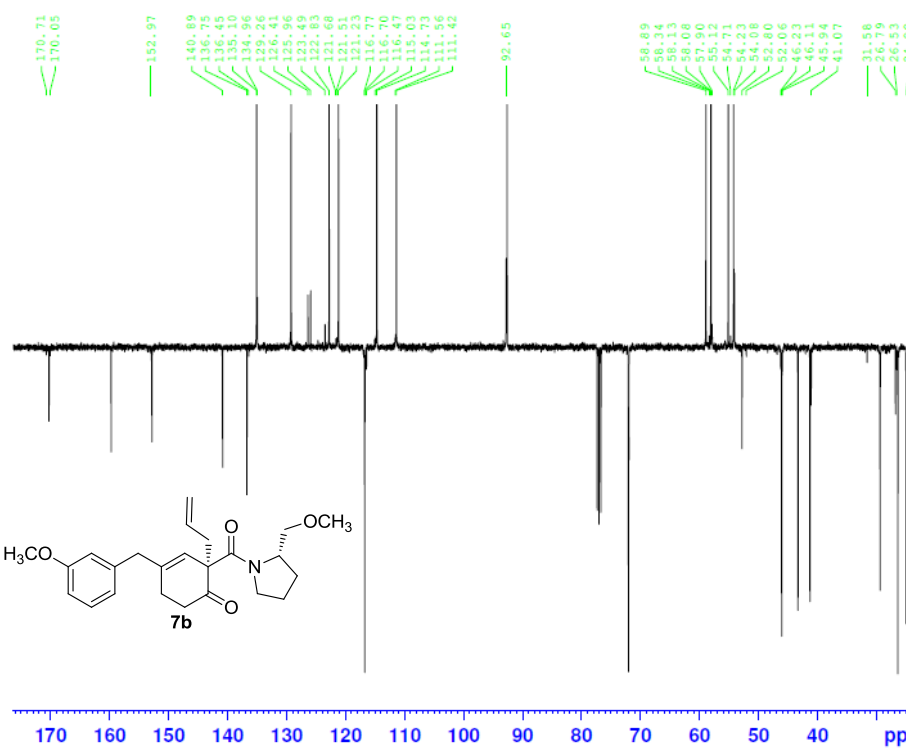

```

Current Data Parameters
NAME      sjb_77_143fp APT
EXPNO    1
PROCNO   1

F2 - Acquisition Parameters
Date_    20130711
Time     8.35
INSTRUM  spect
PROBHD   5 mm PABBO BB-
PULPROG  jmod
TD       65536
SOLVENT  CDCl3
NS       922
DS       4
SWH      24038.461 Hz
FIDRES   0.336798 Hz
AQ       1.3631488 sec
RG       203
DW       20.800 usec
DE       6.50 usec
TE       301.2 K
CNST2    145.0000000
CNST11   1.0000000
D1       2.00000000 sec
D20      0.00689655 sec
TDO      1
  
```

```

----- CHANNEL f1 -----
NUC1     13C
P1       8.00 usec
P2       16.00 usec
PL1      -2.00 dB
PL1W    56.13311005 W
SFO1     100.6278593 MHz

----- CHANNEL f2 -----
CPDPRG2  waltz16
NUC2     1H
PCPD2    80.00 usec
PL2      -2.00 dB
PL12    14.00 dB
PL12W   12.14226913 W
PL12Z   0.30500001 W
SFO2     400.1515172 MHz
  
```

```

F2 - Processing parameters
SI       32768
SF       100.6177980 MHz
WDW      EM
SSB      0
LB       1.00 Hz
GB       0
PC       1.40
  
```

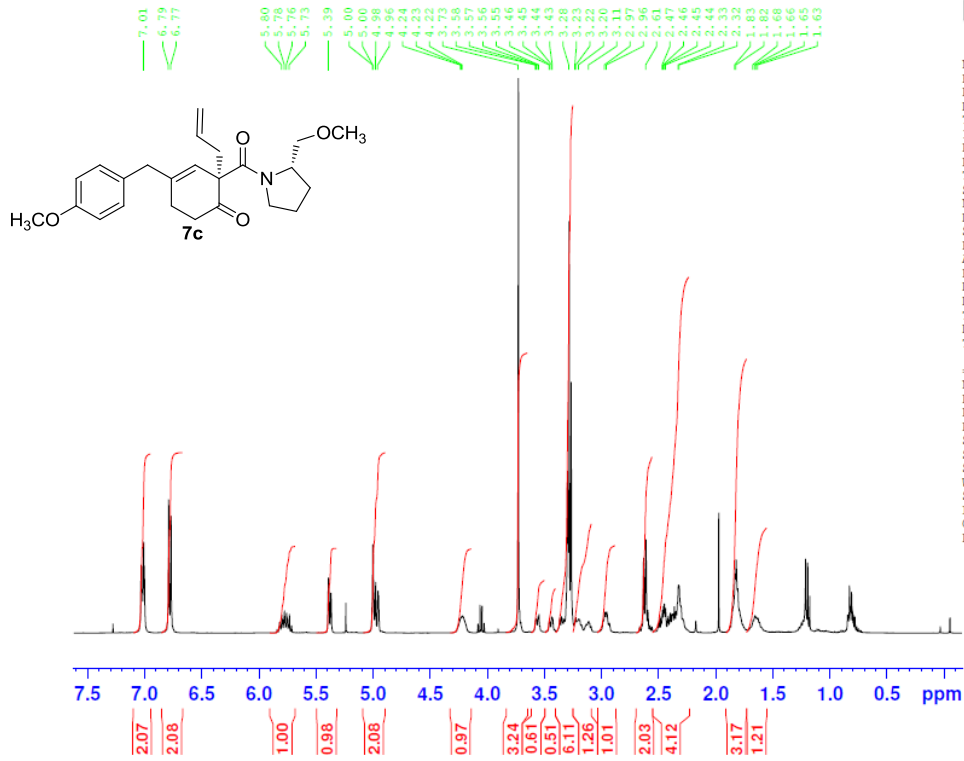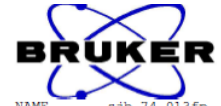

```

NAME      sjb_74_013fp
EXPNO    1
PROCNO   1
Date_    20120604
Time     11.45
INSTRUM  spect
PROBHD   5 mm PABBO BB-
PULPROG  zg30
TD       65536
SOLVENT  CDC13
NS       16
DS       2
SWH      8223.685 Hz
FIDRES   0.125483 Hz
AQ       3.9846387 sec
RG       18
DW       60.800 usec
DE       6.50 usec
TE       301.1 K
D1       1.00000000 sec
TDO      1
===== CHANNEL f1 =====
NUC1     1H
P1       12.50 usec
PL1      -2.00 dB
PL1W     12.14226913 W
SFO1     400.1524711 MHz
SI       32768
SF       400.1500000 MHz
WDW      EM
SSB      0
LB       0.30 Hz
GB       0
PC       1.00
  
```

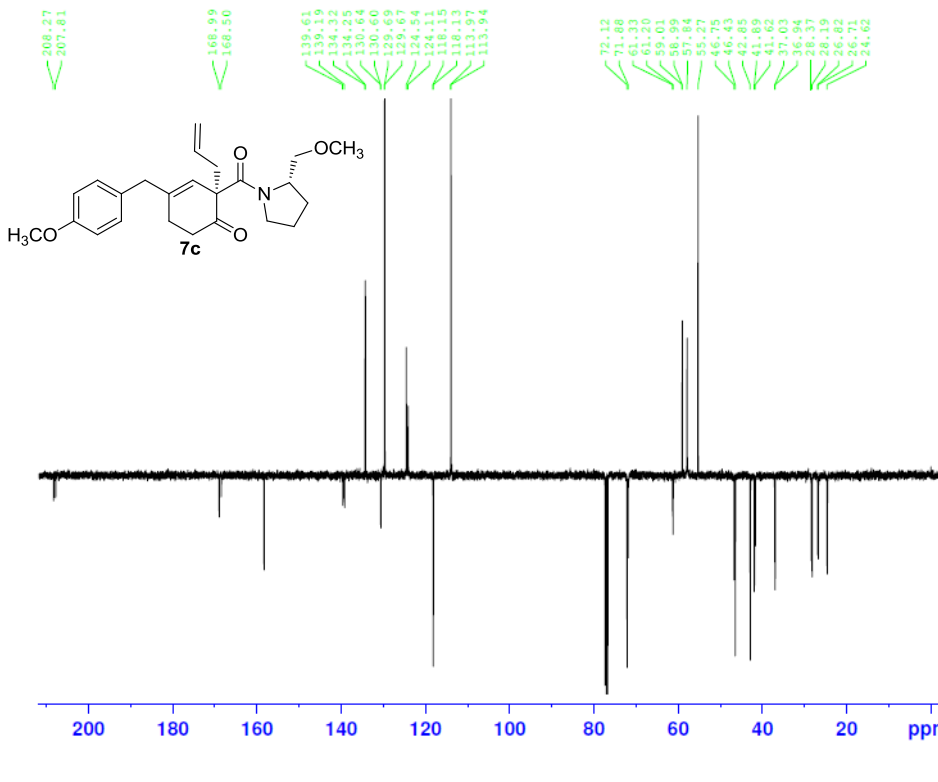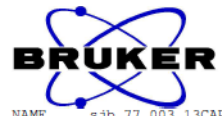

```

NAME      sjb_77_003 13CAPT
EXPNO    1
PROCNO   1
Date_    20121207
Time     12.08
INSTRUM  spect
PROBHD   5 mm PABBO BB-
PULPROG  jmod
TD       65536
SOLVENT  CDC13
NS       1024
DS       4
SWH      21739.131 Hz
FIDRES   0.331713 Hz
AQ       1.5073780 sec
RG       203
DW       23.000 usec
DE       6.50 usec
TE       301.2 K
CNST2   145.0000000
CNST11  1.0000000
D1       2.00000000 sec
D20     0.00689655 sec
TDO      1
----- CHANNEL f1 -----
NUC1     13C
P1       8.00 usec
P2       16.00 usec
PL1      -2.00 dB
PL1W     56.13311005 W
SFO1     100.6282321 MHz
----- CHANNEL f2 -----
CPDPRG2  waltz16
NUC2     1H
PCPD2    80.00 usec
PL2      -2.00 dB
PL12     14.00 dB
PL2W     12.14226913 W
PL12W    0.30500001 W
SFO2     400.1514774 MHz
SI       32768
SF       100.6177980 MHz
WDW      EM
SSB      0
LB       1.00 Hz
GB       0
PC       1.40
  
```

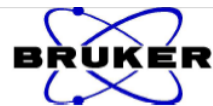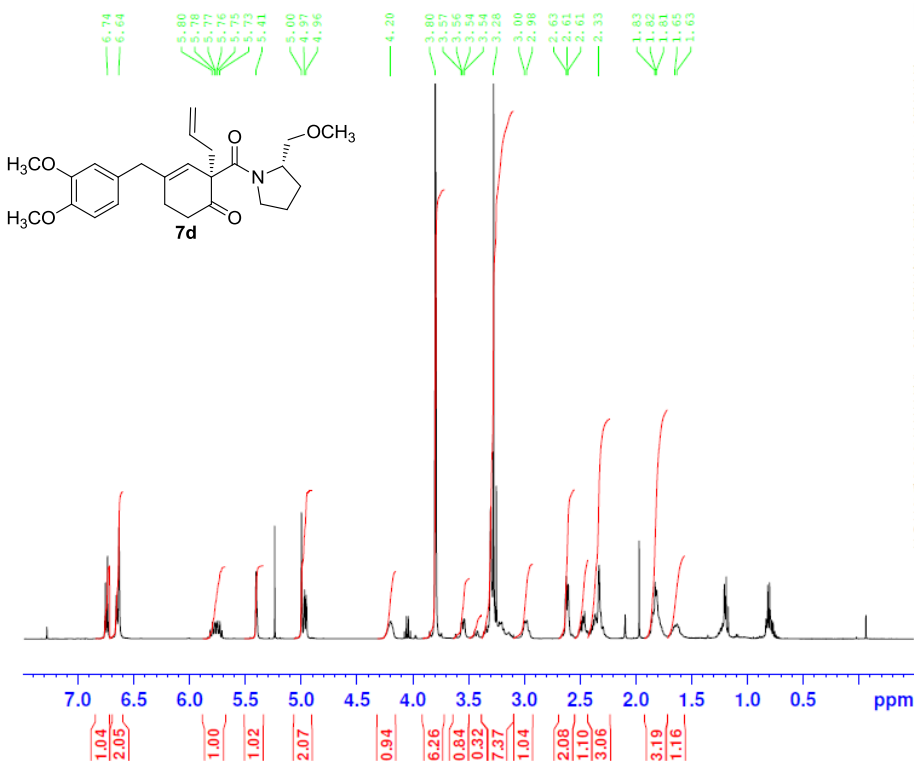

```

NAME      sjb_74_157fp
EXPNO     1
PROCNO    1
Date_     20121004
Time      15.05
INSTRUM   spect
PROBHD    5 mm DUL 13C-1
PULPROG   zg30
TD         65536
SOLVENT   CDCl3
NS         16
DS         2
SWH        8223.685 Hz
FIDRES    0.125483 Hz
AQ         3.9846387 sec
RG         25.4
DW         60.800 usec
DE         6.50 usec
TE         301.2 K
D1         1.00000000 sec
D10        1
===== CHANNEL f1 =====
NUC1      1H
P1         9.80 usec
PL1        -4.00 dB
PL1W      19.24419975 W
SF01      400.1524711 MHz
SI         32768
SF         400.1500000 MHz
WDW        EM
SSB        0
LB         0.30 Hz
GB         0
PC         1.00
  
```

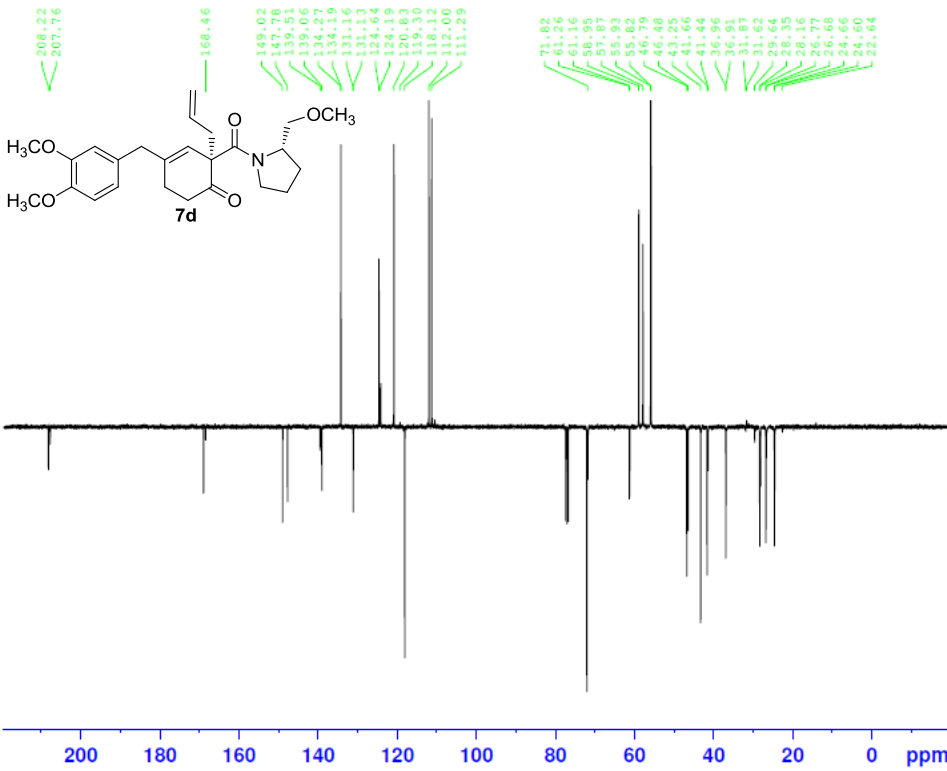

```

Current Data Parameters
NAME      sjb_77_121fp APT
EXPNO     1
PROCNO    1

F2 - Acquisition Parameters
Date_     20130627
Time      9.00
INSTRUM   spect
PROBHD    5 mm PABBO BB-
PULPROG   jmod
ID         65536
SOLVENT   CDCl3
NS         968
DS         4
SWH        24038.461 Hz
FIDRES    0.366798 Hz
AQ         1.3631488 sec
RG         203
DW         20.800 usec
DE         6.50 usec
TE         301.2 K
CNST12    145.0000000
CNST11    1.0000000
D1         2.00000000 sec
D20        0.00689655 sec
TD0        1

===== CHANNEL f1 =====
NUC1      13C
P1         8.00 usec
P2         16.00 usec
PL1        -2.00 dB
PL1W      56.13311005 W
SF01      100.6278593 MHz

===== CHANNEL f2 =====
CPDPRG[2] waltz16
NUC2      1H
PCPD2     80.00 usec
PL2       -2.00 dB
PL12      14.00 dB
PL2W      12.14226913 W
PL12W     0.30500001 W
SF02      400.1514899 MHz

F2 - Processing parameters
SI         32768
SF         100.6177980 MHz
WDW        EM
SSB        0
LB         1.00 Hz
GB         0
PC         1.40
  
```



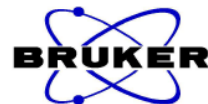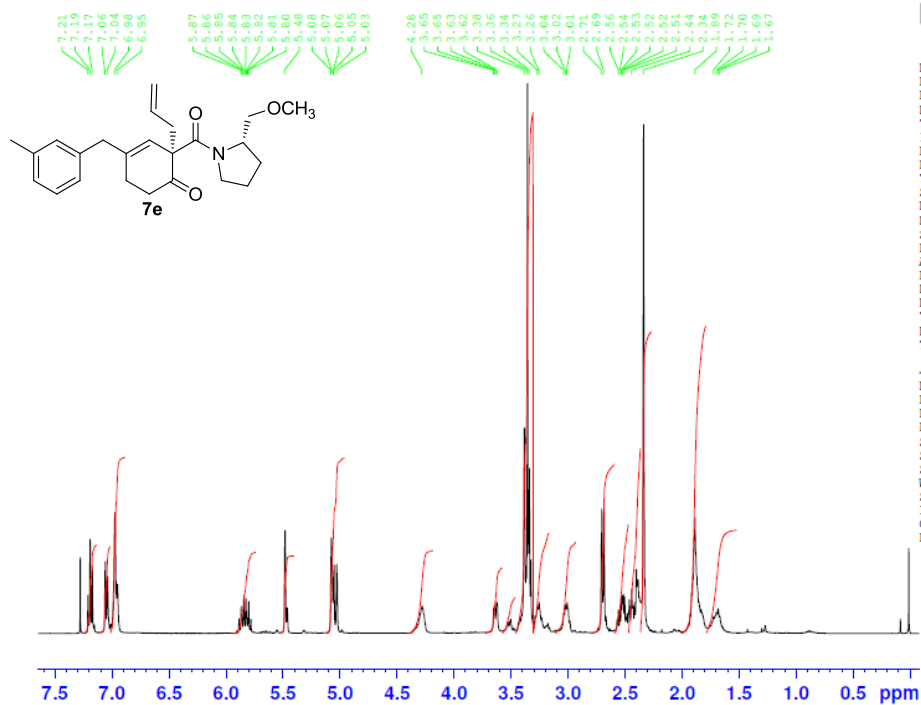

```

NAME      sjb_77_144fp2
EXPNO     1
PROCNO    1
Date_     20130715
Time      7.44
INSTRUM   spect
PROBHD    5 mm PABBO BB-
PULPROG   zg30
TD         65536
SOLVENT   CDCl3
NS         16
DS         2
SWH        8223.685 Hz
FIDRES     0.125483 Hz
AQ         3.9846387 sec
RG         50.8
DW         60.800 usec
DE         6.50 usec
TE         301.2 K
D1         1.00000000 sec
TD0        1

----- CHANNEL f1 -----
NUC1       1H
P1         12.50 usec
PL1        -2.00 dB
PL1W       12.14226913 W
SFO1       400.1524711 MHz
SI         32768
SF         400.1500000 MHz
WDW        EM
SSB        0
LB         0.30 Hz
GB         0
PC         1.00
  
```

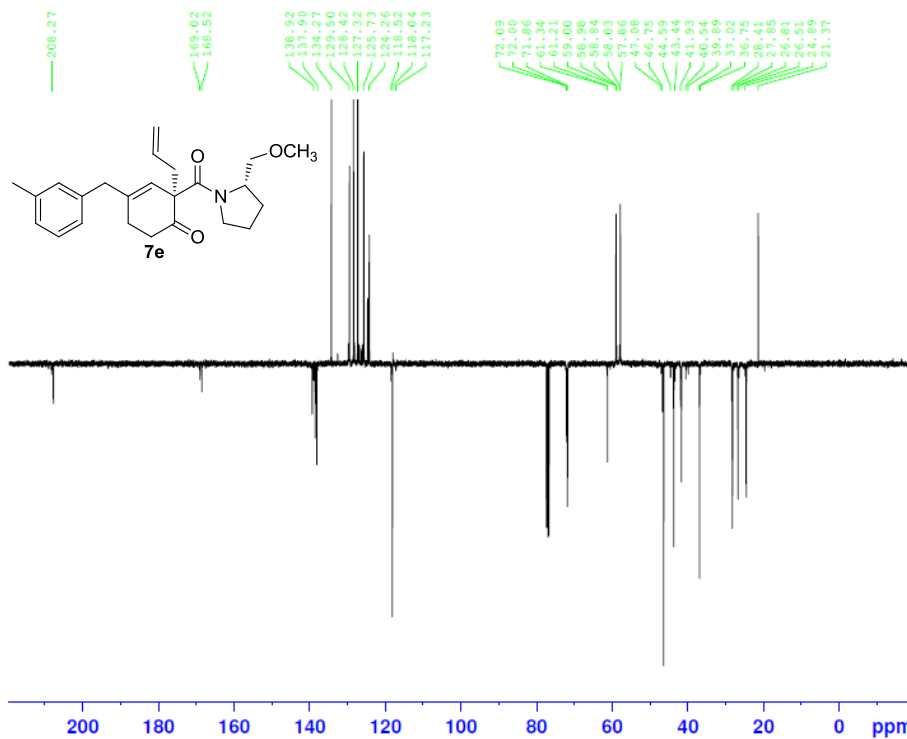

```

Current Data Parameters
NAME      sjb_77_144fp APT
EXPNO     1
PROCNO    1

F2 - Acquisition Parameters
Date_     20130715
Time      8.48
INSTRUM   spect
PROBHD    5 mm PABBO BB-
PULPROG   jmod
TD         65536
SOLVENT   CDCl3
NS         1024
DS         4
SWH        24038.461 Hz
FIDRES     0.366798 Hz
AQ         1.3631488 sec
RG         203
DW         20.800 usec
DE         6.50 usec
TE         301.2 K
CNS12     145.000000
CNS111    1.000000
D1         2.00000000 sec
D20        0.00689655 sec
TD0        1

----- CHANNEL f1 -----
NUC1       13C
P1         8.00 usec
P2         16.00 usec
PL1        -2.00 dB
PL1W       56.13311005 W
SFO1       100.6278593 MHz

----- CHANNEL F2 -----
CPDPRG[2] waltz16
NUC2       1H
PCPD2      80.00 usec
PL2        -2.00 dB
PL12       14.00 dB
PL2W       12.14226913 W
PL12W      0.30500001 W
SFO2       400.1514776 MHz

F2 - Processing parameters
SI         32768
SF         100.6177980 MHz
WDW        EM
SSB        0
LB         1.00 Hz
GB         0
PC         1.40
  
```

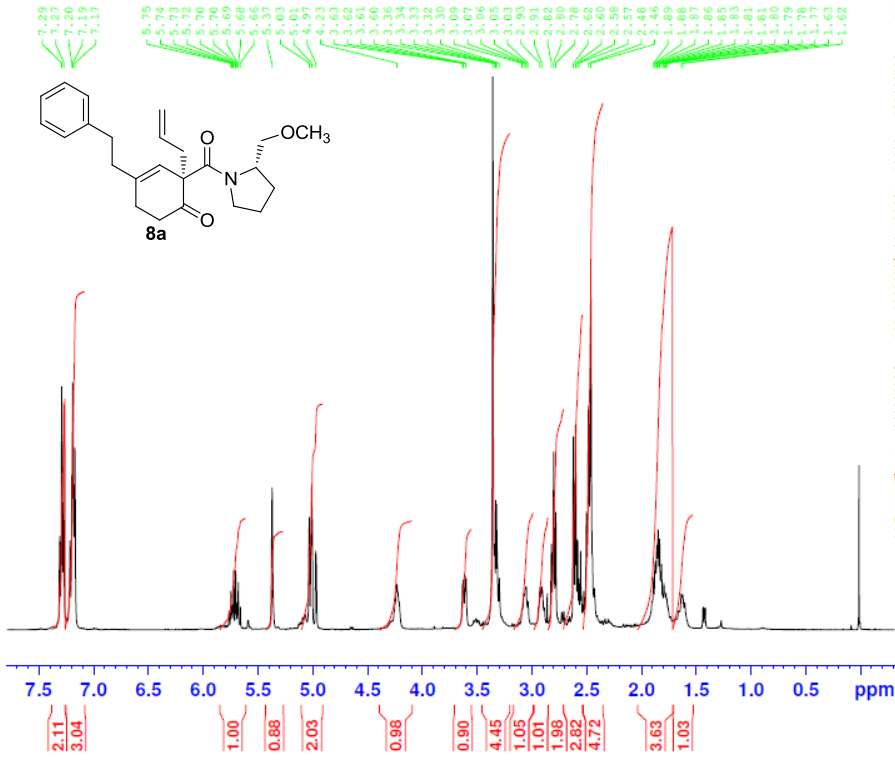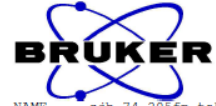

```

NAME      s_jb_74_205fp take 2
EXPNO    1
PROCNO   1
Date_    20130801
Time     10.40
INSTRUM  spect
PROBHD   5 mm PABBO BB-
PULPROG  zg30
TD       65536
SOLVENT  CDCl3
NS       16
DS       2
SWH      8223.685 Hz
FIDRES   0.125483 Hz
AQ       3.9846387 sec
RG       50.8
DW       60.800 usec
DE       6.50 usec
TE       301.2 K
D1       1.0000000 sec
TD0      1

----- CHANNEL f1 -----
NUC1     1H
P1       12.50 usec
PL1      -2.00 dB
PL1W     12.14226913 W
SFO1     400.1524711 MHz
SI       32768
SF       400.1500000 MHz
WDW      EM
SSB      0
LB       0.30 Hz
GB       0
PC       1.00
  
```

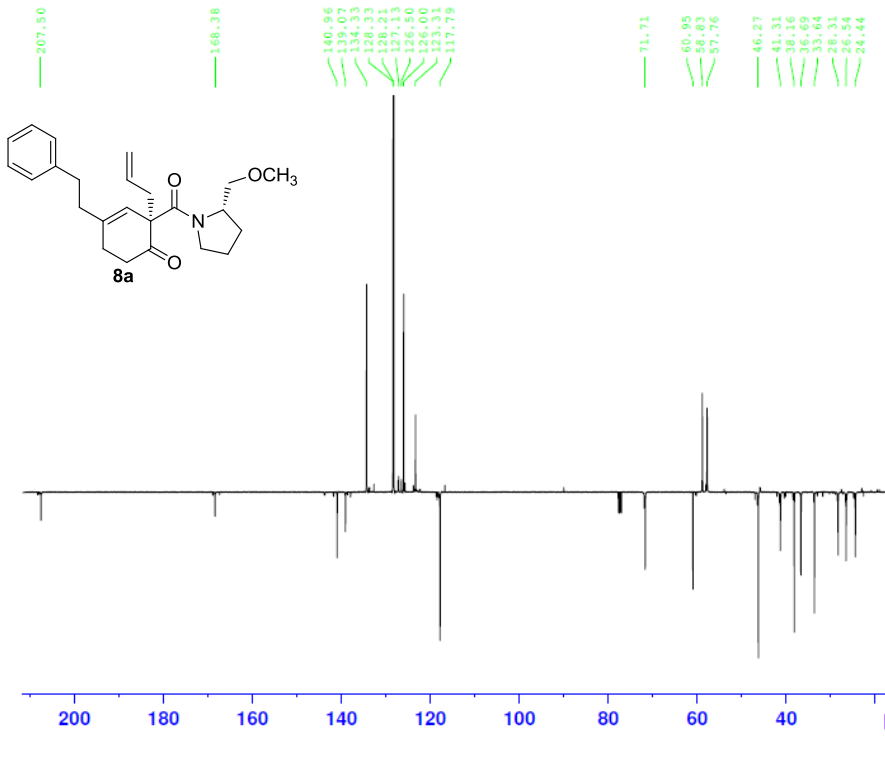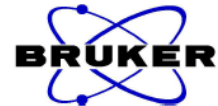

```

NAME      s_jb_74_205fp 13CAPT
EXPNO    1
PROCNO   1
Date_    20121114
Time     16.58
INSTRUM  spect
PROBHD   5 mm PABBO BB-
PULPROG  jmod
TD       65536
SOLVENT  CDCl3
NS       1056
DS       4
SWH      20380.436 Hz
FIDRES   0.310981 Hz
AQ       1.6078665 sec
RG       203
DW       24.533 usec
DE       6.50 usec
TE       301.2 K
CNST2    145.0000000
CNST11   1.0000000
D1       2.0000000 sec
D20      0.00689655 sec
TD0      1

----- CHANNEL f1 -----
NUC1     13C
P1       8.00 usec
P2       16.00 usec
PL1      -2.00 dB
PL1W     56.13311005 W
SFO1     100.6288927 MHz

----- CHANNEL f2 -----
CPDPRG2  waltz16
NUC2     1H
PCPD2    80.00 usec
PL2      -2.00 dB
PL12     14.00 dB
PL2W     12.14226913 W
PL12W    0.30500001 W
SFO2     400.1514317 MHz
SI       32768
SF       100.6177980 MHz
WDW      EM
SSB      0
LB       1.00 Hz
GB       0
PC       1.40
  
```

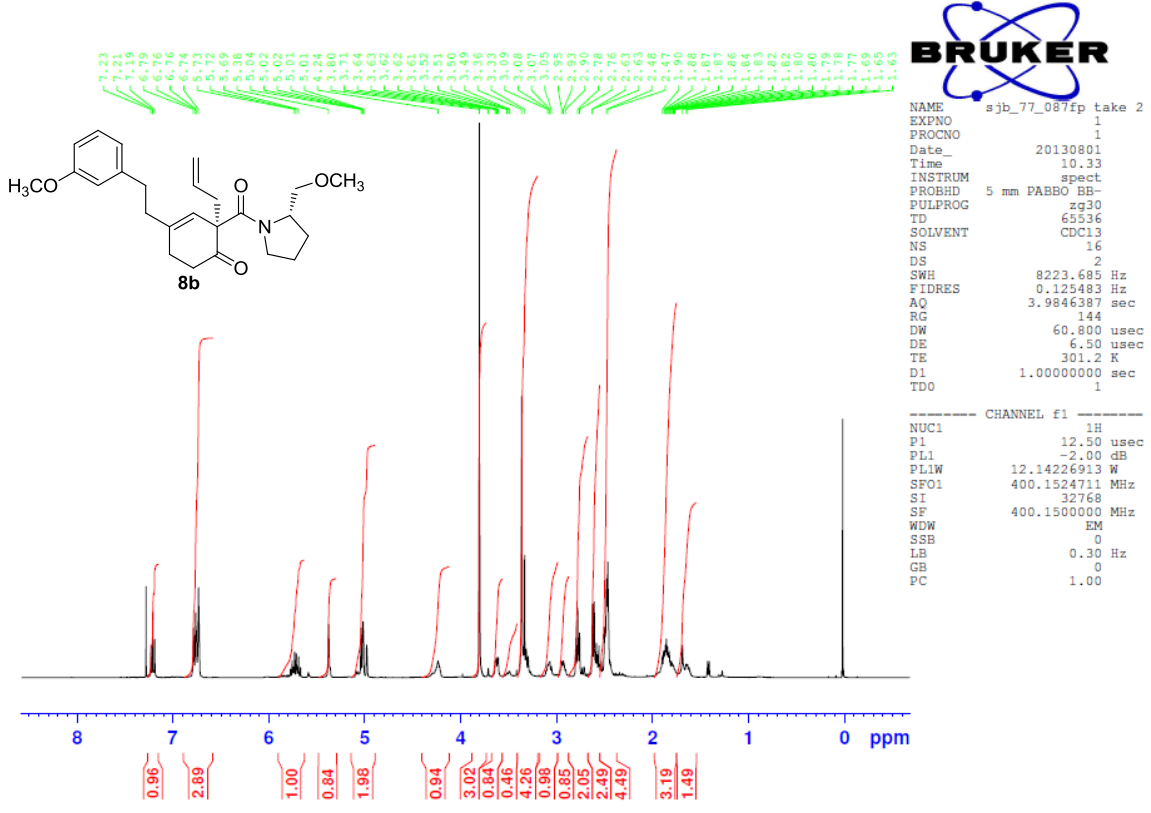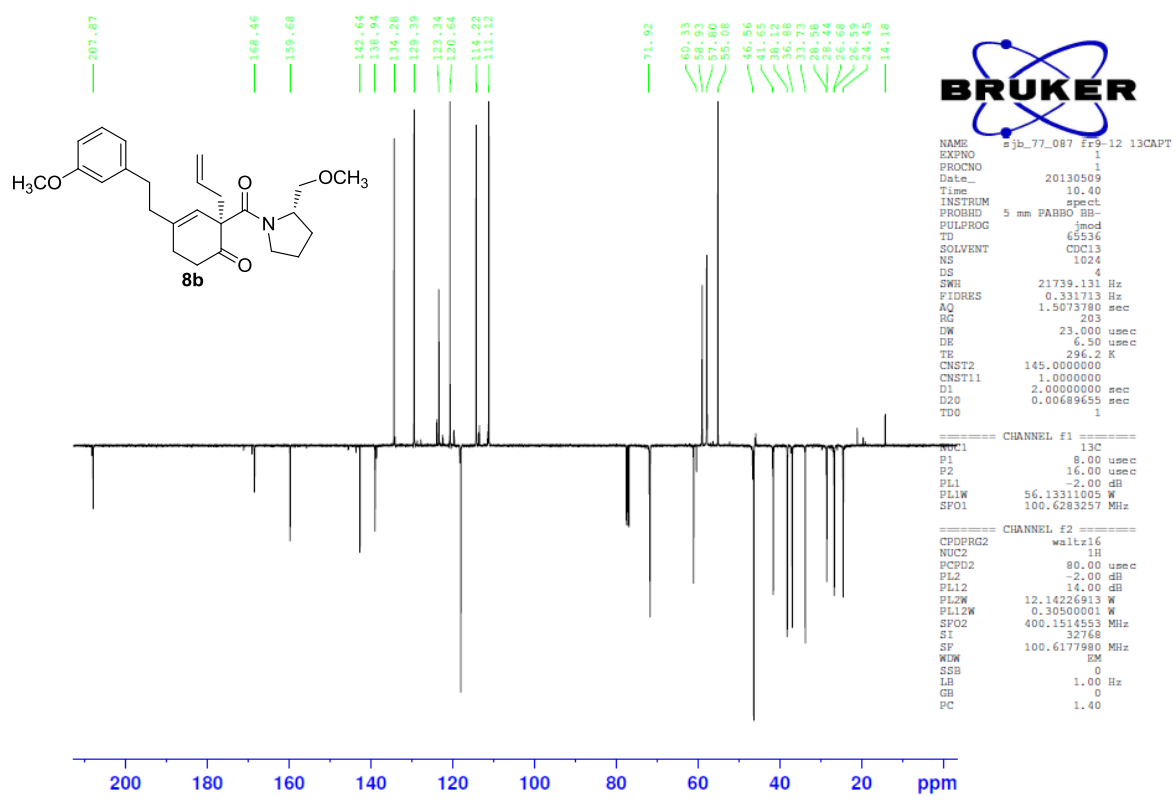

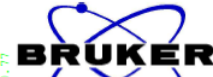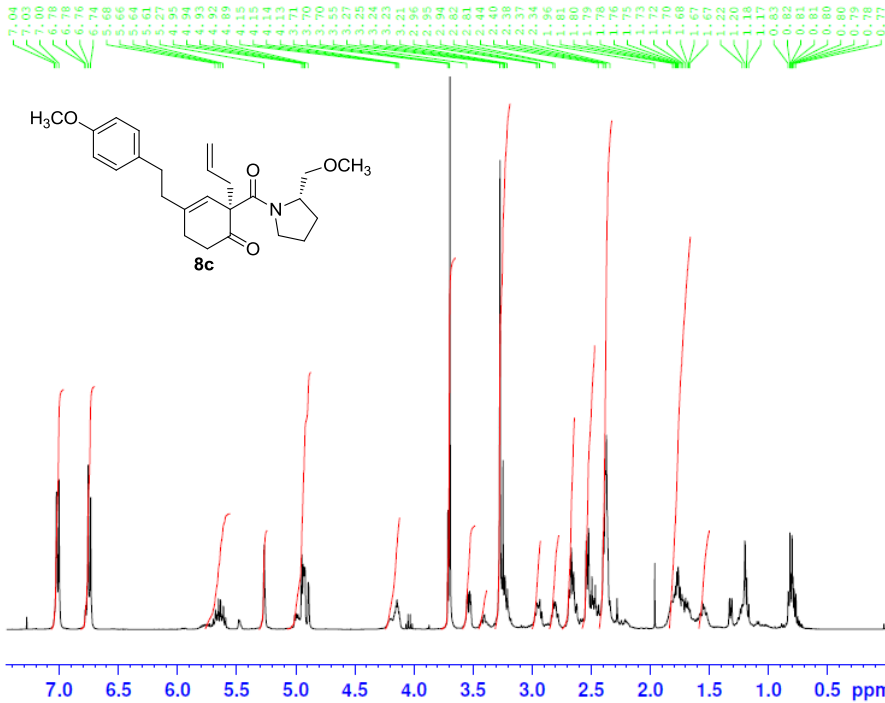

NAME ra\_67\_156column  
EXPNO 1  
PROCNO 1  
Date\_ 20120727  
Time 14.50  
INSTRUM spect  
PROBHD 5 mm PABBO BB-  
PULPROG zg30  
TD 65536  
SOLVENT CDCl3  
NS 16  
DS 2  
SWH 8223.685 Hz  
FIDRES 0.125483 Hz  
AQ 3.9846387 sec  
RG 16  
DW 60.800 usec  
DE 6.50 usec  
TE 295.2 K  
D1 1.00000000 sec  
TD0 1

===== CHANNEL f1 =====  
NUC1 1H  
P1 12.50 usec  
PL1 -2.00 dB  
PL1W 12.14226913 W  
SFO1 400.1524711 MHz  
SI 32768  
SF 400.1500000 MHz  
WDW EM  
SSB 0  
LB 0.30 Hz  
GB 0  
PC 1.00

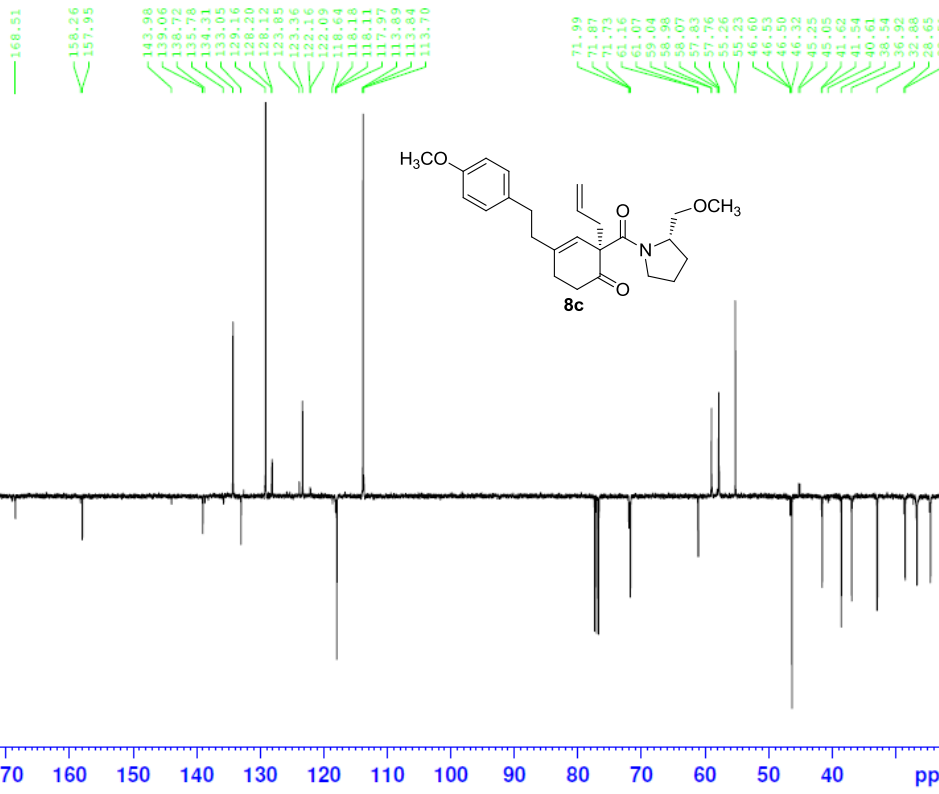

Current Data Parameters  
NAME ajb\_77\_223fpAPT  
EXPNO 1  
PROCNO 1  
F2 - Acquisition Parameters  
Date\_ 20130923  
Time 16.11  
INSTRUM spect  
PROBHD 5 mm PABBO BB-  
PULPROG jmod  
TD 65536  
SOLVENT CDCl3  
NS 1024  
DS 4  
SWH 24038.461 Hz  
FIDRES 0.366798 Hz  
AQ 1.3631488 sec  
RG 203  
DW 20.800 usec  
DE 6.50 usec  
TE 298.2 K  
CNST2 145.0000000  
CNST11 1.0000000  
D1 2.00000000 sec  
D20 0.00689655 sec  
TD0 1

----- CHANNEL f1 -----  
NUC1 13C  
P1 8.00 usec  
P2 16.00 usec  
PL1 -2.00 dB  
PL1W 56.13311005 W  
SFO1 100.6278593 MHz

----- CHANNEL f2 -----  
CPDPRG2 waltz16  
NUC2 1H  
PCPD2 75.00 usec  
PL2 -2.00 dB  
PL12 13.39 dB  
PL2W 12.14226913 W  
PL12W 0.35099408 W  
SFO2 400.1515369 MHz

F2 - Processing parameters  
SI 32768  
SF 100.6177980 MHz  
WDW EM  
SSB 0  
LB 1.00 Hz  
GB 0  
PC 1.40

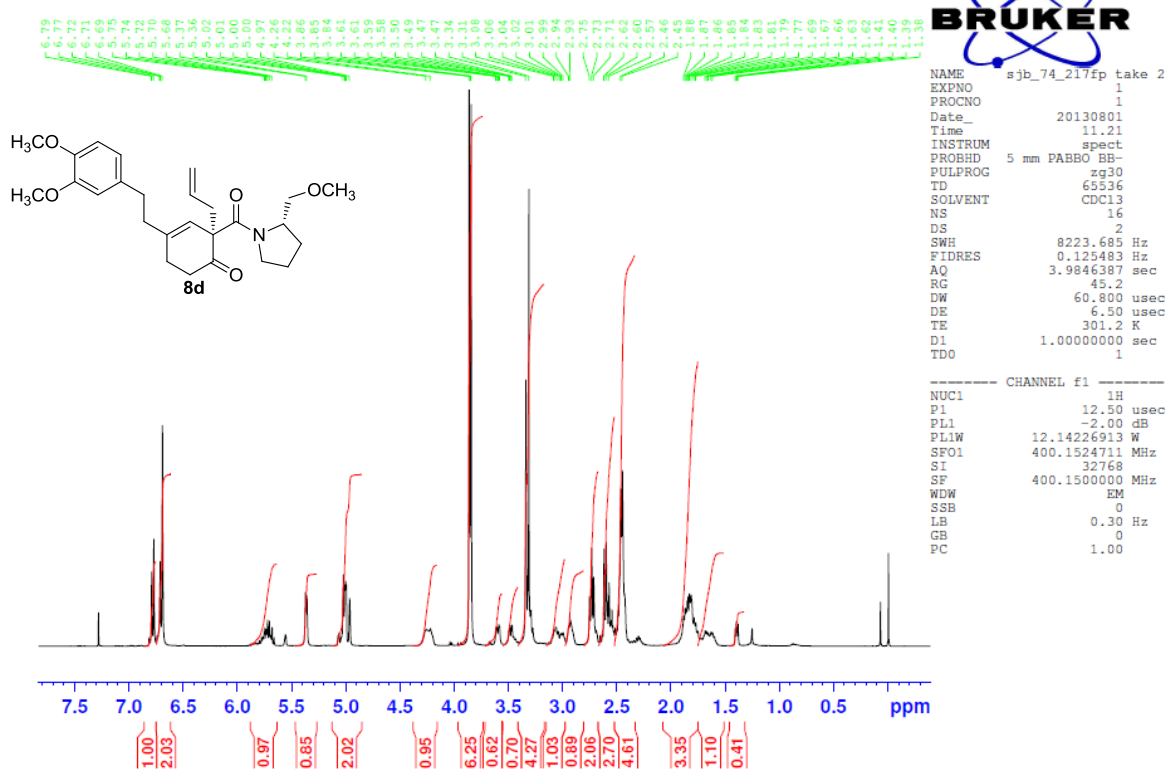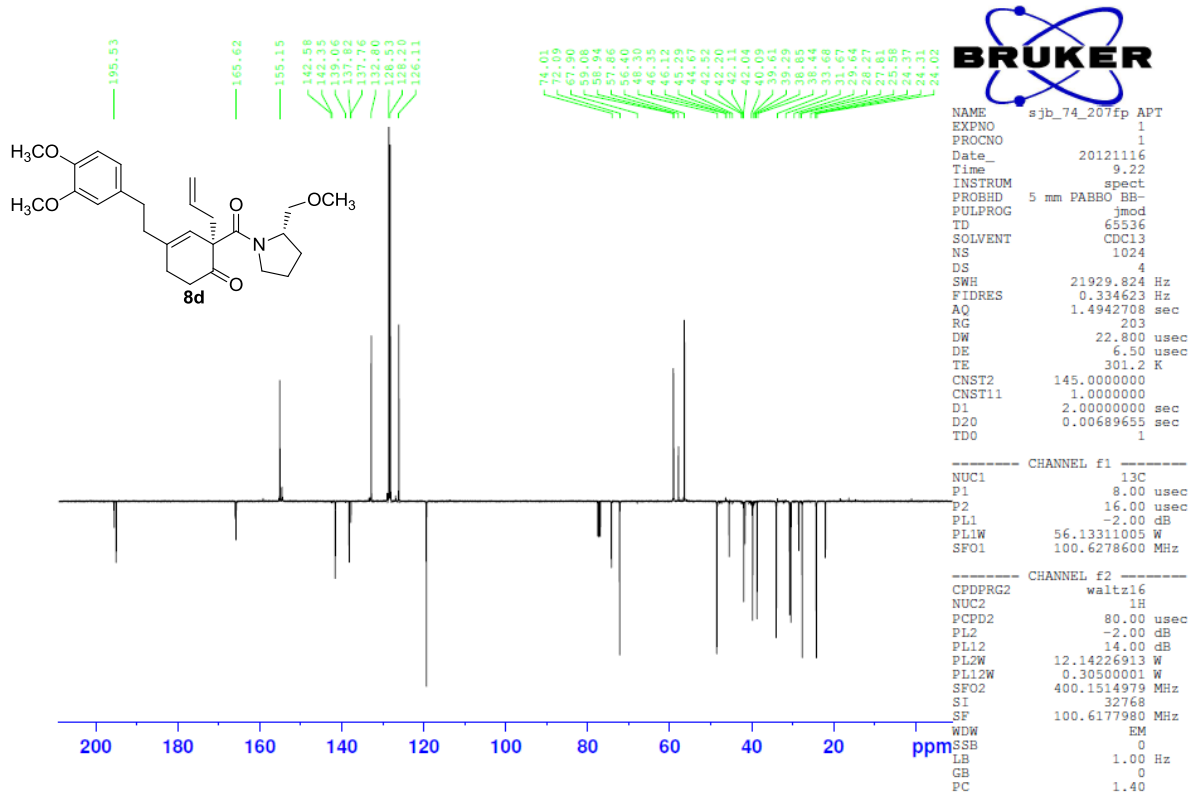

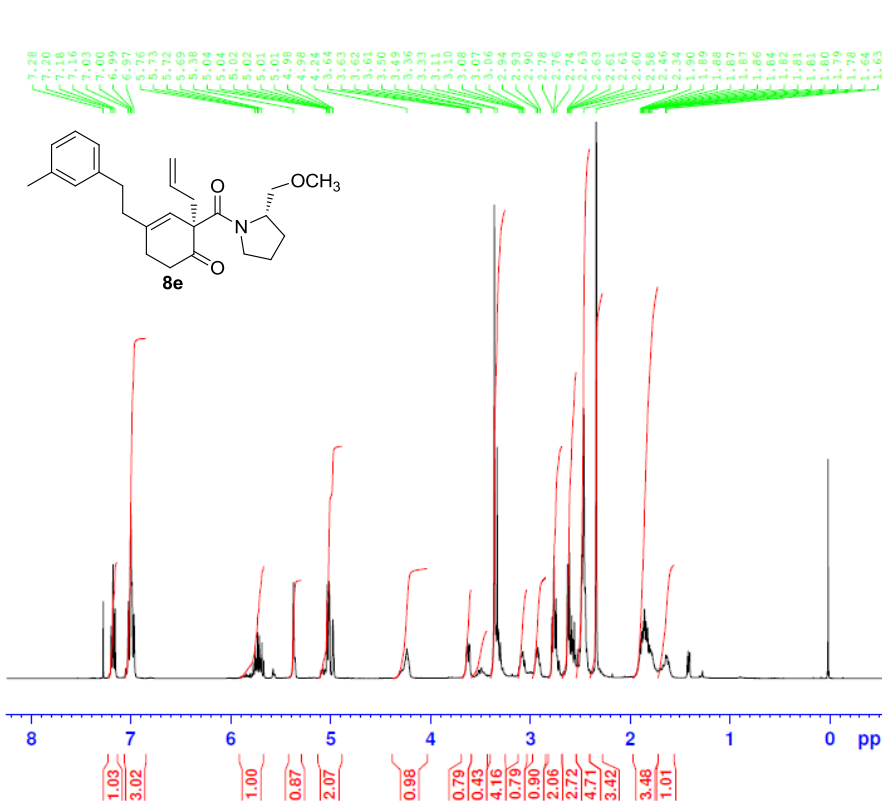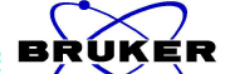

```

NAME      sjb_77_023fp take 2
EXPNO    1
PROCNO   1
Date_    20130801
Time     11.02
INSTRUM  spect
PROBHD   5 mm PABBO BB-
PULPROG  zg30
TD        65536
SOLVENT  CDC13
NS        16
DS        2
SWH       8223.685 Hz
FIDRES   0.125483 Hz
AQ        3.9846387 sec
RG        90.5
DW        60.800 usec
DE        6.50 usec
TE        301.2 K
D1        1.00000000 sec
TD0       1

----- CHANNEL f1 -----
NUC1      1H
P1        12.50 usec
PL1       -2.00 dB
PL1W      12.14226913 W
SFO1      400.1524711 MHz
SI        32768
SF        400.1500000 MHz
WDW       EM
SSB       0
LB        0.30 Hz
GB        0
PC        1.00

```

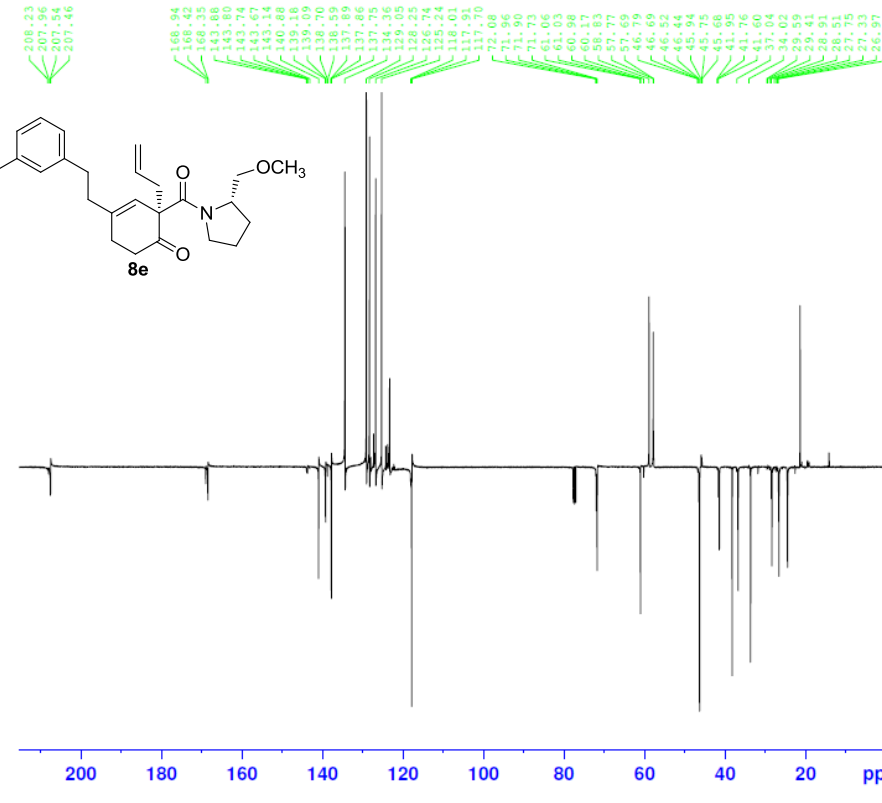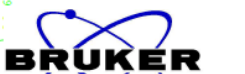

```

NAME      sjb_77_023fp 13CAPT
EXPNO    1
PROCNO   1
Date_    20130104
Time     16.42
INSTRUM  spect
PROBHD   5 mm PABBO BB-
PULPROG  jmod
TD        65536
SOLVENT  CDC13
NS        1024
DS        4
SWH       22058.824 Hz
FIDRES   0.336591 Hz
AQ        1.4855326 sec
RG        203
DW        22.667 usec
DE        6.50 usec
TE        301.2 K
CNST2    145.0000000
CNST11   1.0000000
D1        2.00000000 sec
D20       0.00689655 sec
TD0       1

----- CHANNEL f1 -----
NUC1      13C
P1        8.00 usec
P2        16.00 usec
PL1       -2.00 dB
PL1W      56.13311005 W
SFO1      100.6284193 MHz

----- CHANNEL f2 -----
CPDPRG2  waltz16
NUC2      1H
PCPD2     80.00 usec
PL2       -2.00 dB
PL12      14.00 dB
PL2W      12.14226913 W
PL12W     0.30500001 W
SFO2      400.1514794 MHz
SI        32768
SF        100.6177980 MHz
WDW       EM
SSB       0
LB        1.00 Hz
GB        0
PC        1.40

```

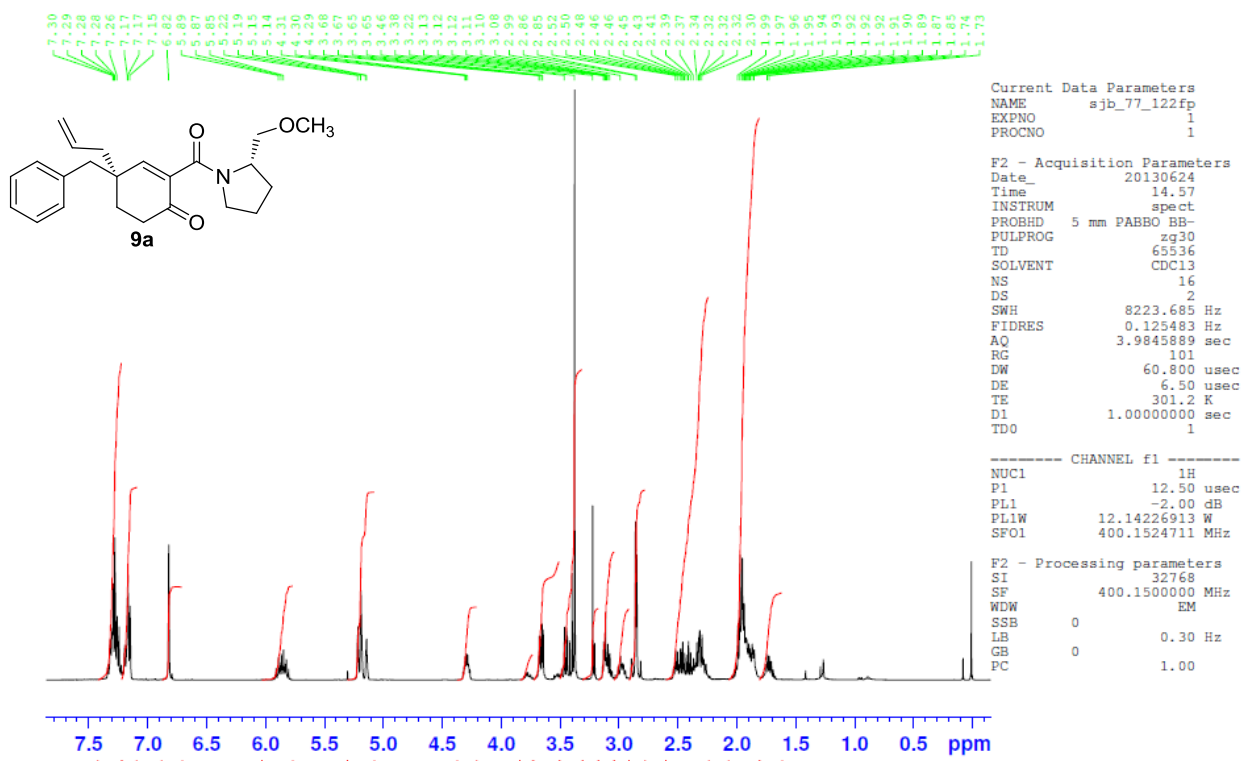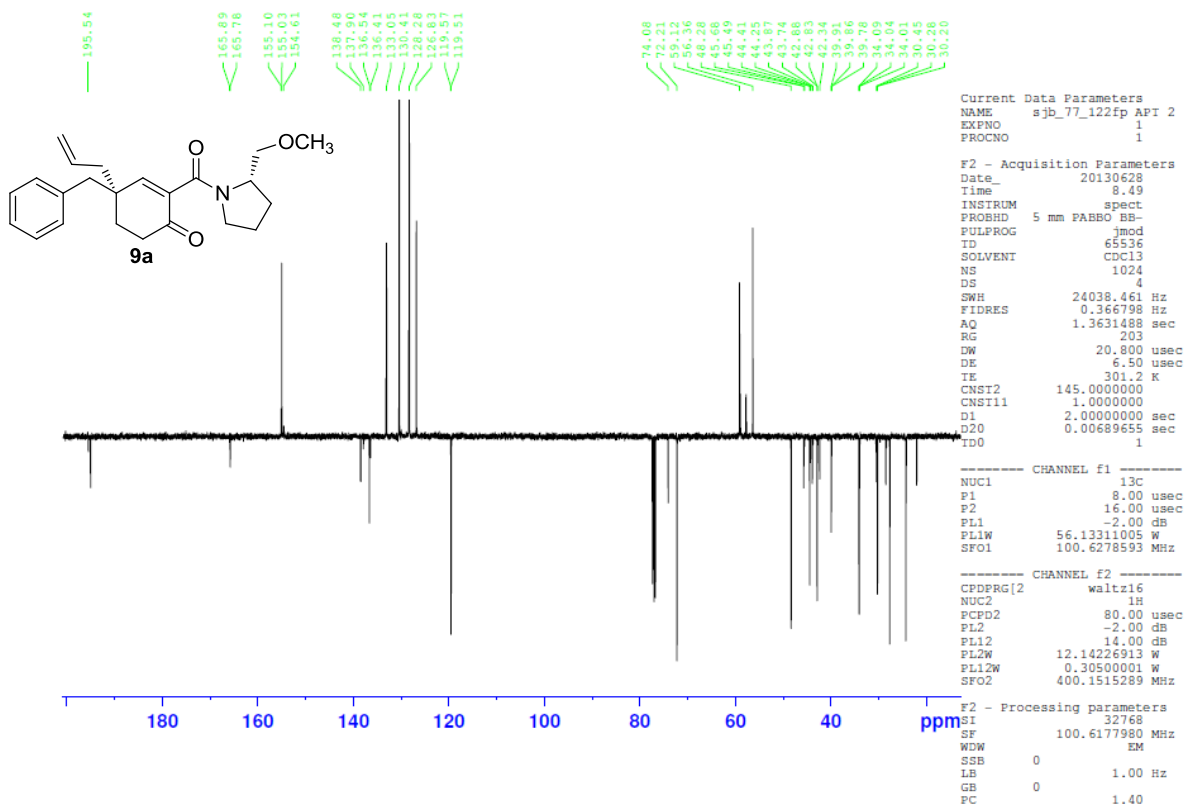

Area Percent Report

Data Path : C:\msdchem\1\DATA\  
 Data File : sjb\_77\_122fp.D  
 Acq On : 24 Jun 2013 12:57  
 Operator : JMB  
 Sample : sjb\_77\_122fp  
 Misc :  
 ALS Vial : 85 Sample Multiplier: 1

Integration Parameters: autoint1.e  
 Integrator: ChemStation

Method : C:\msdchem\1\5973N\PRECISION.M  
 Title :

Signal : TIC: sjb\_77\_122fp.D\data.ms

| peak # | R.T. min | first scan | max scan | last scan | PK TY | peak height | corr. area | corr. % max. | % of total |
|--------|----------|------------|----------|-----------|-------|-------------|------------|--------------|------------|
| 1      | 11.771   | 1250       | 1257     | 1267      | PV 5  | 23815       | 610660     | 0.06%        | 0.054%     |
| 2      | 12.360   | 1356       | 1360     | 1361      | VV 3  | 14161       | 144431     | 0.01%        | 0.013%     |
| 3      | 12.492   | 1361       | 1383     | 1384      | VV 3  | 45976       | 1701208    | 0.16%        | 0.152%     |
| 4      | 12.629   | 1384       | 1407     | 1408      | VV 3  | 140358      | 7593364    | 0.70%        | 0.677%     |
| 5      | 13.152   | 1408       | 1498     | 1538      | VV    | 19156629    | 1087462192 | 100.00%      | 96.982%    |
| 6      | 13.432   | 1538       | 1547     | 1577      | VV 5  | 422396      | 23796626   | 2.19%        | 2.122%     |

Sum of corrected areas: 1121308482



Abundance

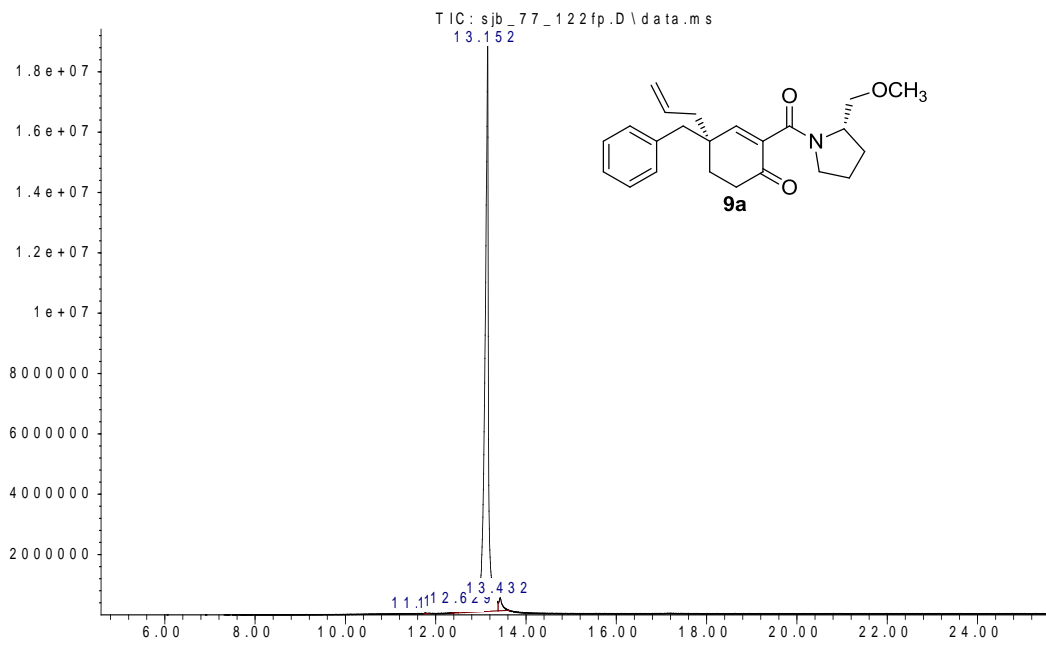

Time-->  
Abundance

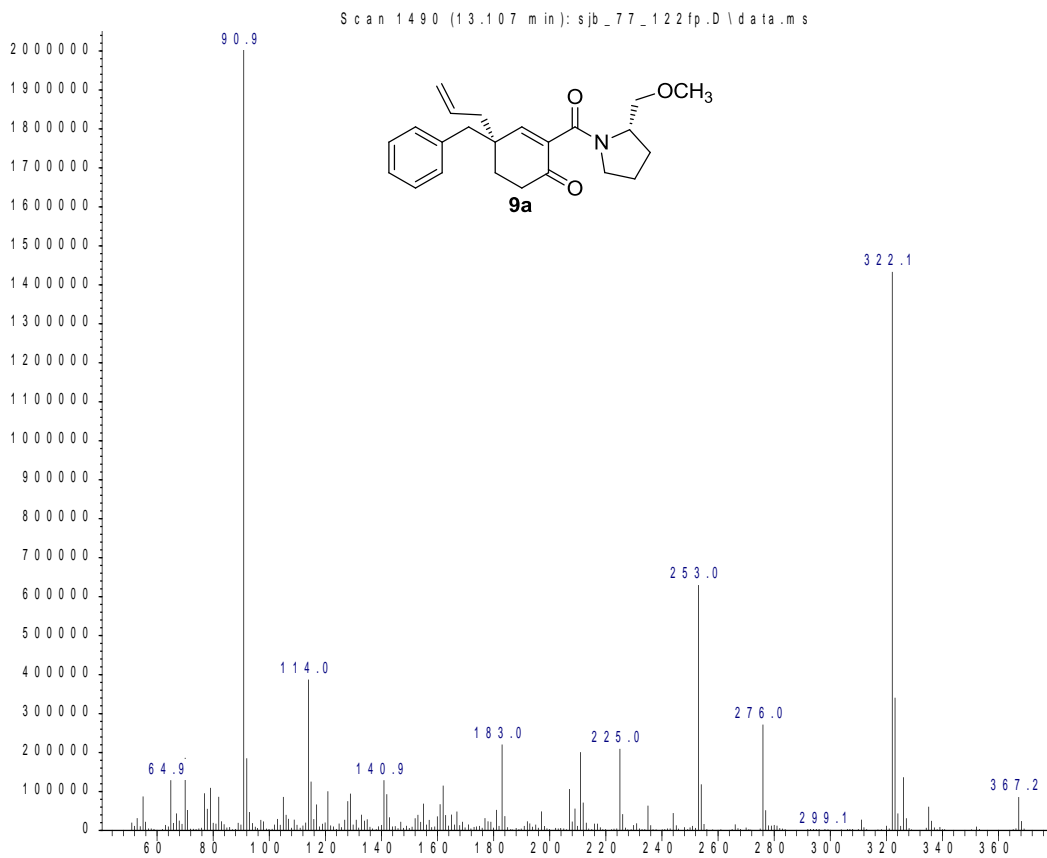

m/z-->

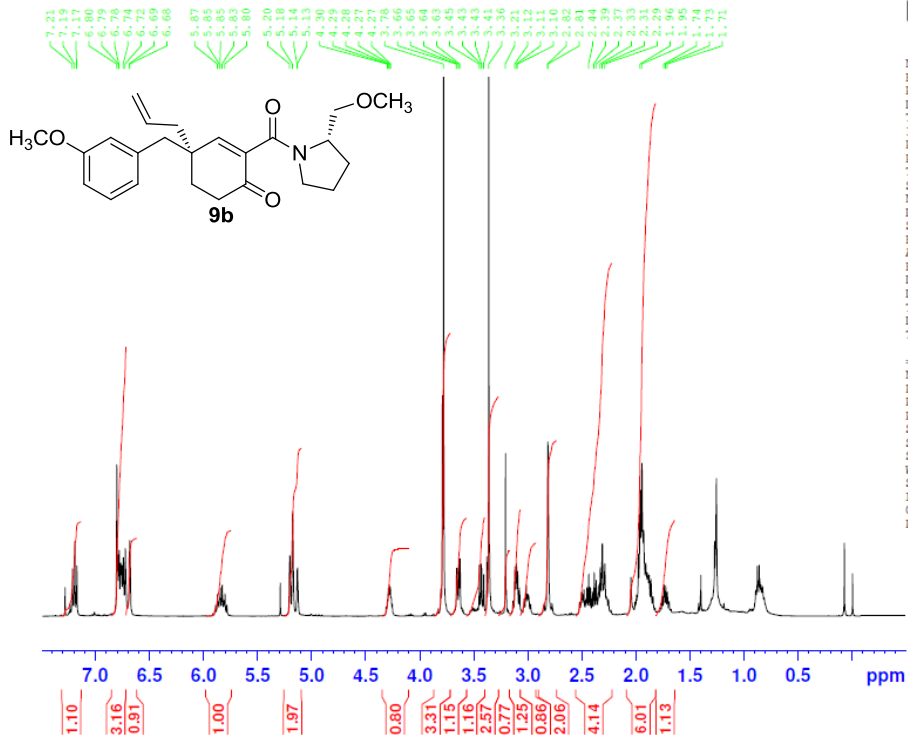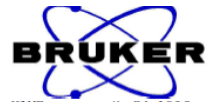

```

NAME      sjb_74_158fp
EXPNO     1
PROCNO    1
Date_     20121005
Time      17.11
INSTRUM   spect
PROBHD    5 mm DUL 13C-1
PULPROG   zg30
TD         65536
SOLVENT   CDCl3
NS         16
DS         2
SWH       8223.685 Hz
FIDRES    0.125483 Hz
AQ         3.9846387 sec
RG         40.3
DW         60.800 usec
DE         6.50 usec
TE         301.2 K
D1         1.00000000 sec
TD0        1
  
```

```

===== CHANNEL f1 =====
NUC1      1H
P1        9.80 usec
PL1       -4.00 dB
PL1W      19.24419975 W
SFO1      400.1524711 MHz
SI         32768
SF         400.1500000 MHz
WDW        EM
SSB        0
LB         0.30 Hz
GB         0
PC         1.00
  
```

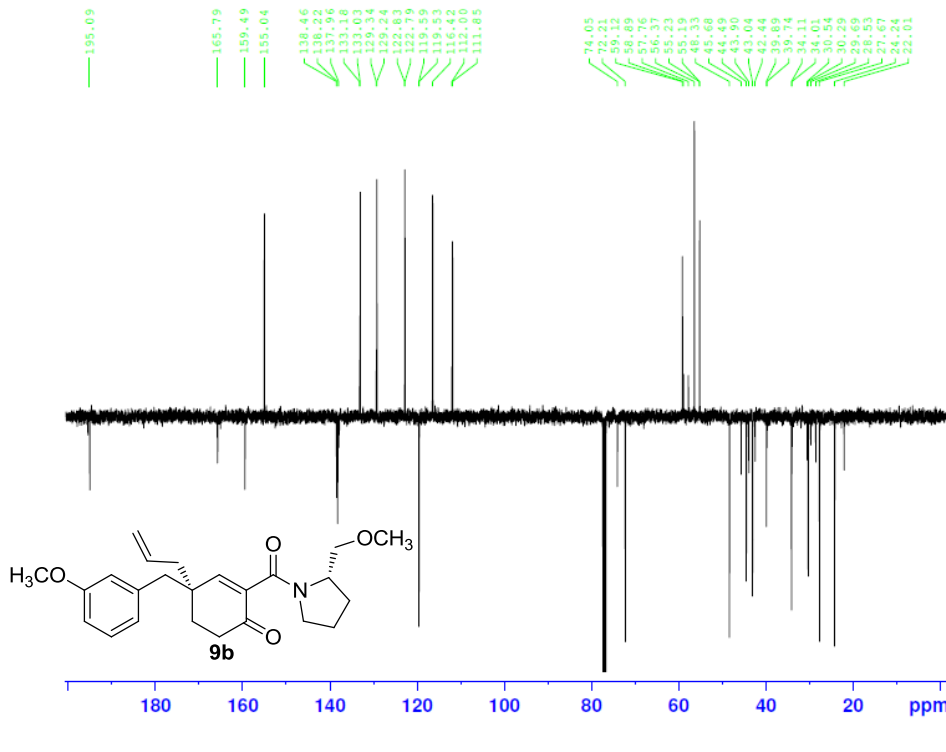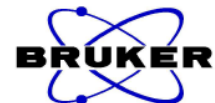

```

NAME      sjb_74_158fp APT
EXPNO     1
PROCNO    1
Date_     20121026
Time      9.14
INSTRUM   spect
PROBHD    5 mm DUL 13C-1
PULPROG   jmod
TD         65536
SOLVENT   CDCl3
NS         1024
DS         4
SWH       20380.436 Hz
FIDRES    0.310981 Hz
AQ         1.6078665 sec
RG         203
DW         24.533 usec
DE         6.50 usec
TE         301.2 K
CNST2     145.0000000
CNST11    1.0000000
D1         2.00000000 sec
D20        0.00689655 sec
TD0        1
  
```

```

----- CHANNEL f1 -----
NUC1      13C
P1         9.00 usec
P2         18.00 usec
PL1        0.00 dB
PL1W       35.41759872 W
SFO1      100.6277865 MHz
  
```

```

----- CHANNEL f2 -----
CPDPRG2   waltz16
NUC2       1H
PCPD2     80.00 usec
PL2       -3.80 dB
PL12      13.80 dB
PL2W      18.37806102 W
PL12W     0.31937420 W
SFO2      400.1514268 MHz
SI         32768
SF         100.6177980 MHz
WDW        EM
SSB        0
LB         1.00 Hz
GB         0
PC         1.40
  
```

Area Percent Report

Data Path : C:\msdchem\1\DATA\  
Data File : sjb\_74\_158fp.D  
Acq On : 5 Oct 2012 16:36  
Operator : sjb  
Sample : sjb\_74\_158fp  
Misc :  
ALS Vial : 100 Sample Multiplier: 1

Integration Parameters: autoint1.e  
Integrator: ChemStation

Method : C:\msdchem\1\METHODS\JMB2.m  
Title :

Signal : TIC: sjb\_74\_158fp.D\data.ms

| peak # | R.T. min | first scan | max scan | last scan | PK TY | peak height | corr. area | corr. % max. | % of total |
|--------|----------|------------|----------|-----------|-------|-------------|------------|--------------|------------|
| 1      | 9.261    | 812        | 818      | 847       | BV 3  | 35666       | 858934     | 0.33%        | 0.319%     |
| 2      | 11.374   | 1180       | 1187     | 1198      | BV 2  | 45443       | 646248     | 0.25%        | 0.240%     |
| 3      | 15.307   | 1810       | 1875     | 1896      | VV 2  | 3303222     | 262174800  | 100.00%      | 97.492%    |
| 4      | 15.933   | 1969       | 1984     | 2012      | VV 7  | 115524      | 5238394    | 2.00%        | 1.948%     |

Sum of corrected areas: 268918376

JMB2.m Mon Nov 12 09:53:58 2012

Abundance

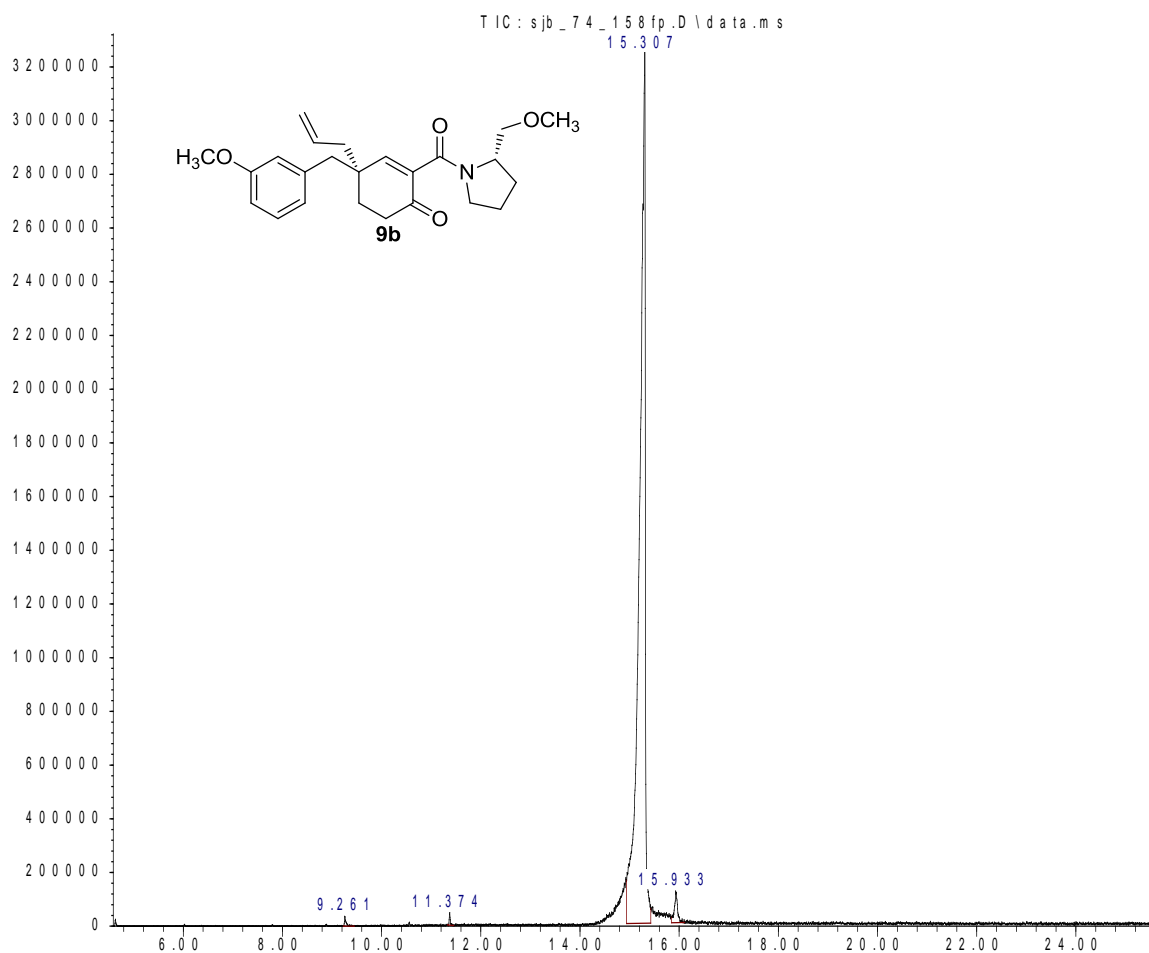

Time-->

Abundance

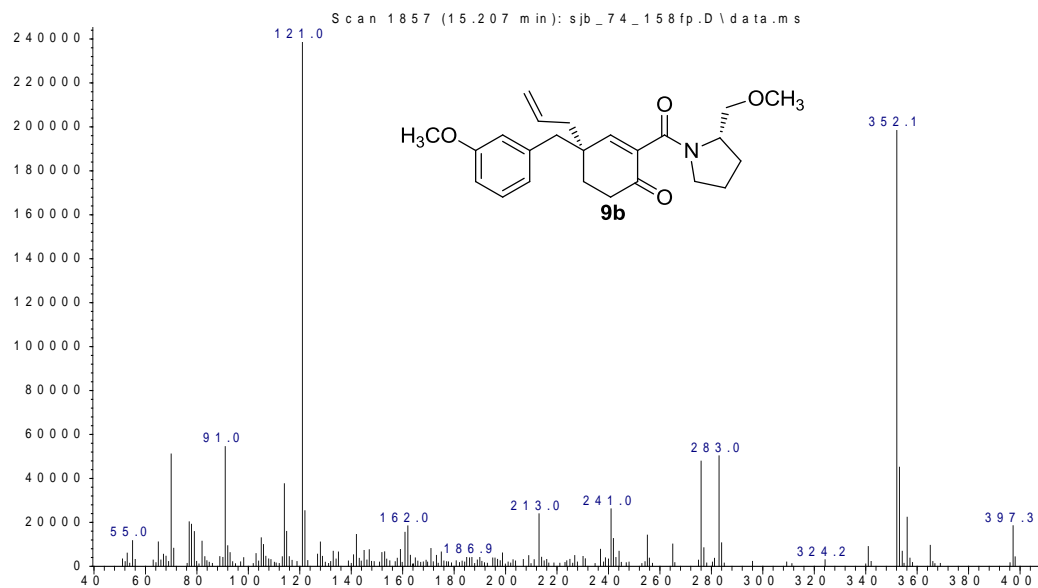

m/z-->

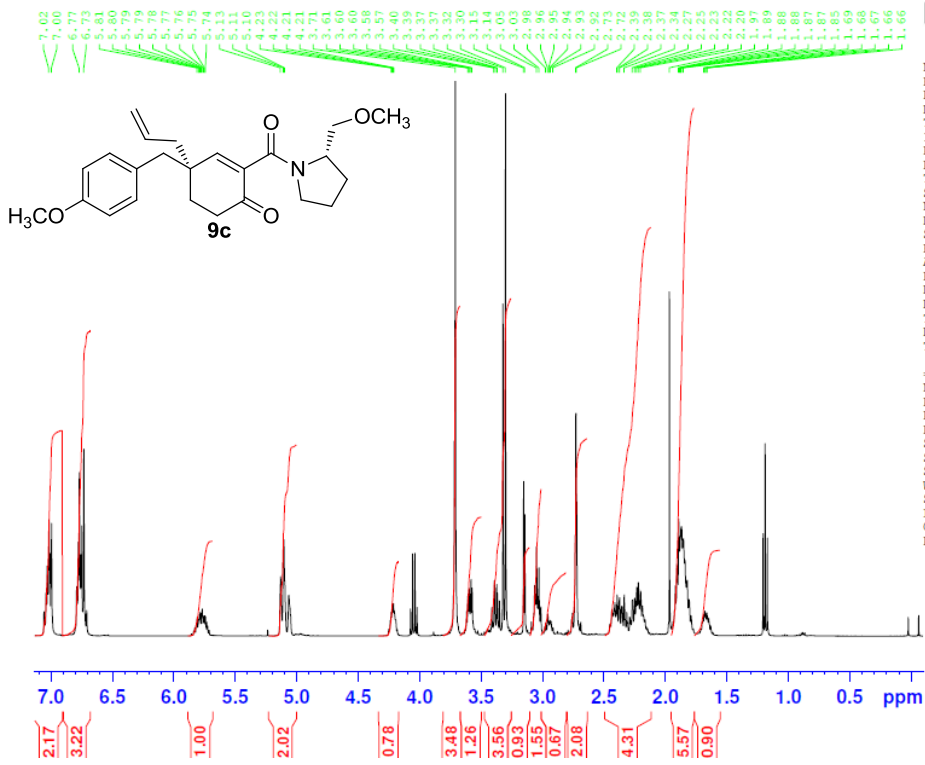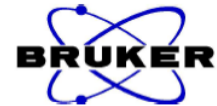

```

NAME      sjb_74_015fp
EXPNO    1
PROCNO   1
Date_    20120605
Time     14.50
INSTRUM  spect
PROBHD   5 mm PABBO BB-
PULPROG  zg30
TD        65536
SOLVENT  CDCl3
NS        16
DS        2
SWH       8223.685 Hz
FIDRES   0.125483 Hz
AQ        3.9846387 sec
RG        20.2
DW        60.800 usec
DE        6.50 usec
TE        301.2 K
D1        1.00000000 sec
TD0       1

===== CHANNEL f1 =====
NUC1      1H
P1        12.50 usec
PL1       -2.00 dB
PL1W      12.14226913 W
SFO1      400.1524711 MHz
SI        32768
SF        400.1500000 MHz
WDW       EM
SSB       0
LB        0.30 Hz
GB        0
PC        1.00
  
```

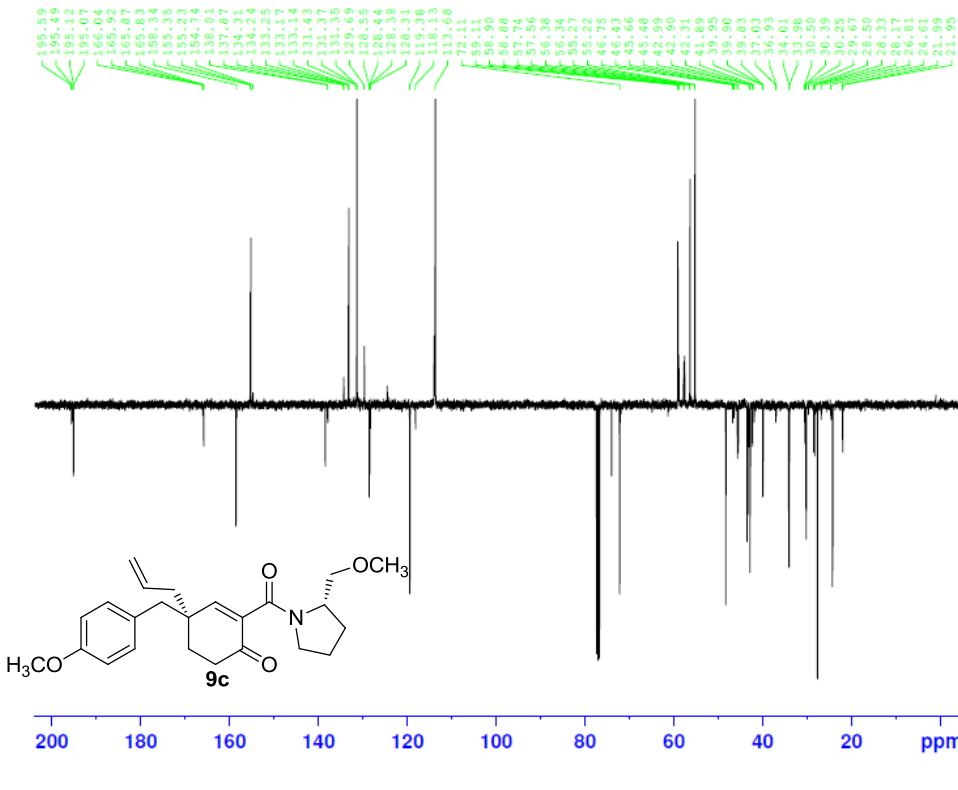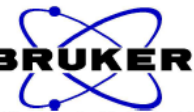

```

NAME      sjb_77_004fp 13CAPT
EXPNO    1
PROCNO   1
Date_    20121210
Time     11.56
INSTRUM  spect
PROBHD   5 mm PABBO BB-
PULPROG  jmod
TD        65536
SOLVENT  CDCl3
NS        1024
DS        4
SWH       21008.404 Hz
FIDRES   0.320563 Hz
AQ        1.5598068 sec
RG        203
DW        23.800 usec
DE        6.50 usec
TE        301.2 K
CNST2    145.0000000
CNST11   1.0000000
D1        2.00000000 sec
D20       0.00689655 sec
TD0       1

===== CHANNEL f1 =====
NUC1      13C
P1        8.00 usec
P2        16.00 usec
PL1       -2.00 dB
PL1W      56.13311005 W
SFO1      100.6277976 MHz

===== CHANNEL f2 =====
CPDPRG2  waltz16
NUC2      1H
PCPD2    80.00 usec
PL2       -2.00 dB
PL12     14.00 dB
PL2W     12.14226913 W
PL12W    0.305000001 W
SFO2     400.1514930 MHz
SI        32768
SF        100.6177980 MHz
WDW       EM
SSB       0
LB        1.00 Hz
GB        0
PC        1.40
  
```

Area Percent Report

Data Path : C:\msdchem\1\DATA\  
Data File : sjb\_74\_015fp.D  
Acq On : 5 Jun 2012 12:00  
Operator : sjb  
Sample : sjb\_74\_015fp  
Misc :  
ALS Vial : 30 Sample Multiplier: 1

Integration Parameters: autoint1.e  
Integrator: ChemStation

Method : C:\msdchem\1\METHODS\JMB2.m  
Title :

Signal : TIC: sjb\_74\_015fp.D\data.ms

| peak # | R.T. min | first scan | max scan | last scan | PK TY | peak height | corr. area | corr. % max. | % of total |
|--------|----------|------------|----------|-----------|-------|-------------|------------|--------------|------------|
| 1      | 16.008   | 1774       | 1997     | 2062      | BV    | 3280944     | 386191361  | 100.00%      | 96.065%    |
| 2      | 16.422   | 2062       | 2069     | 2081      | VV 8  | 101564      | 5645103    | 1.46%        | 1.404%     |
| 3      | 16.565   | 2081       | 2094     | 2159      | VB 7  | 146121      | 10172724   | 2.63%        | 2.530%     |

Abundance

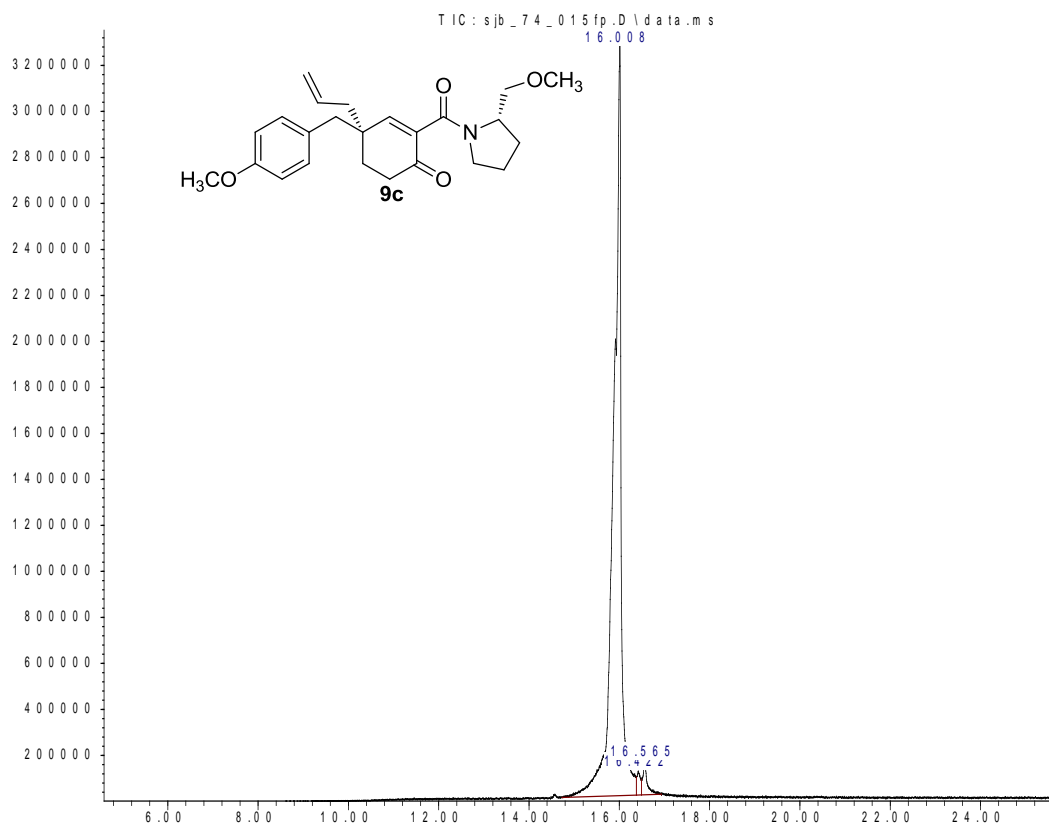

Time-->

Abundance

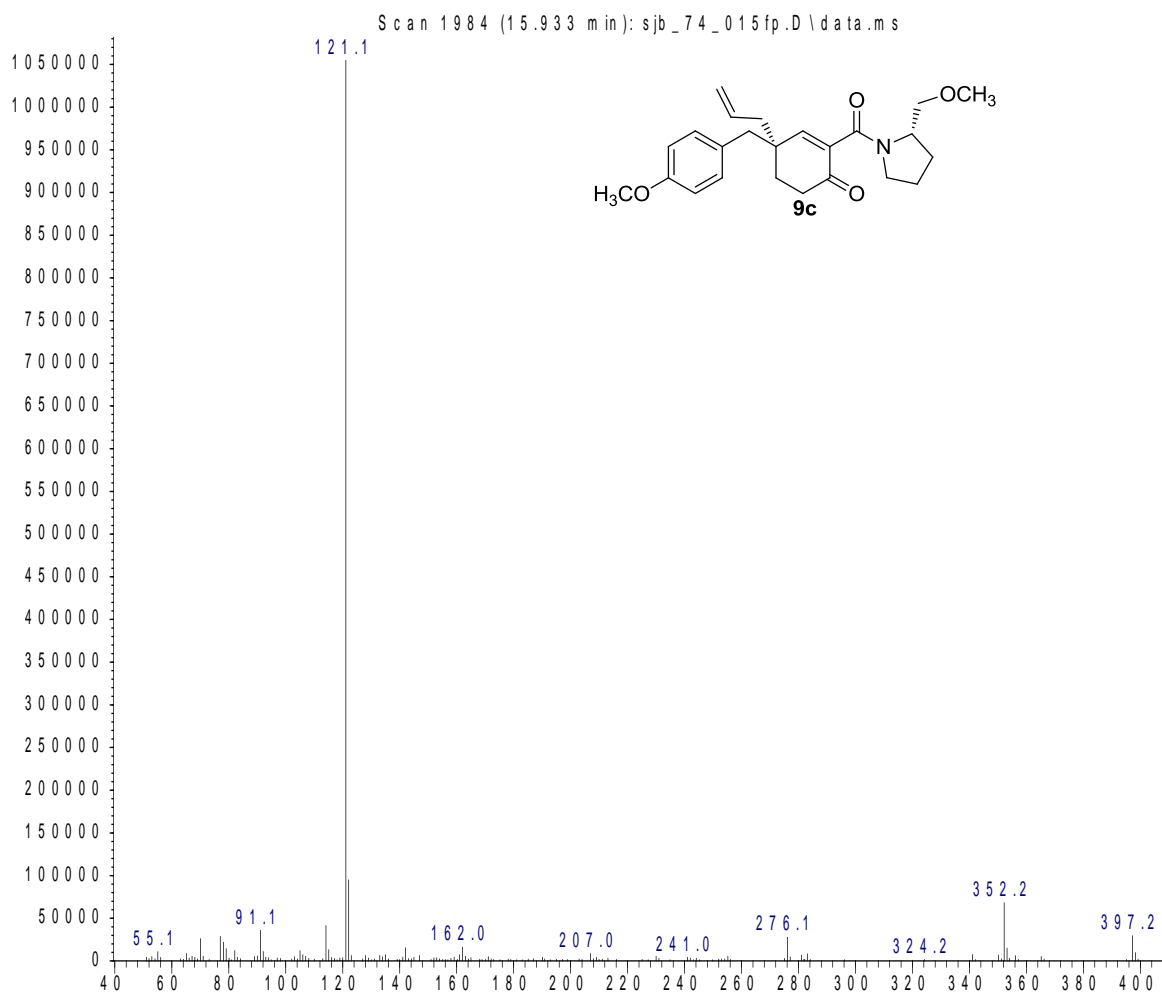



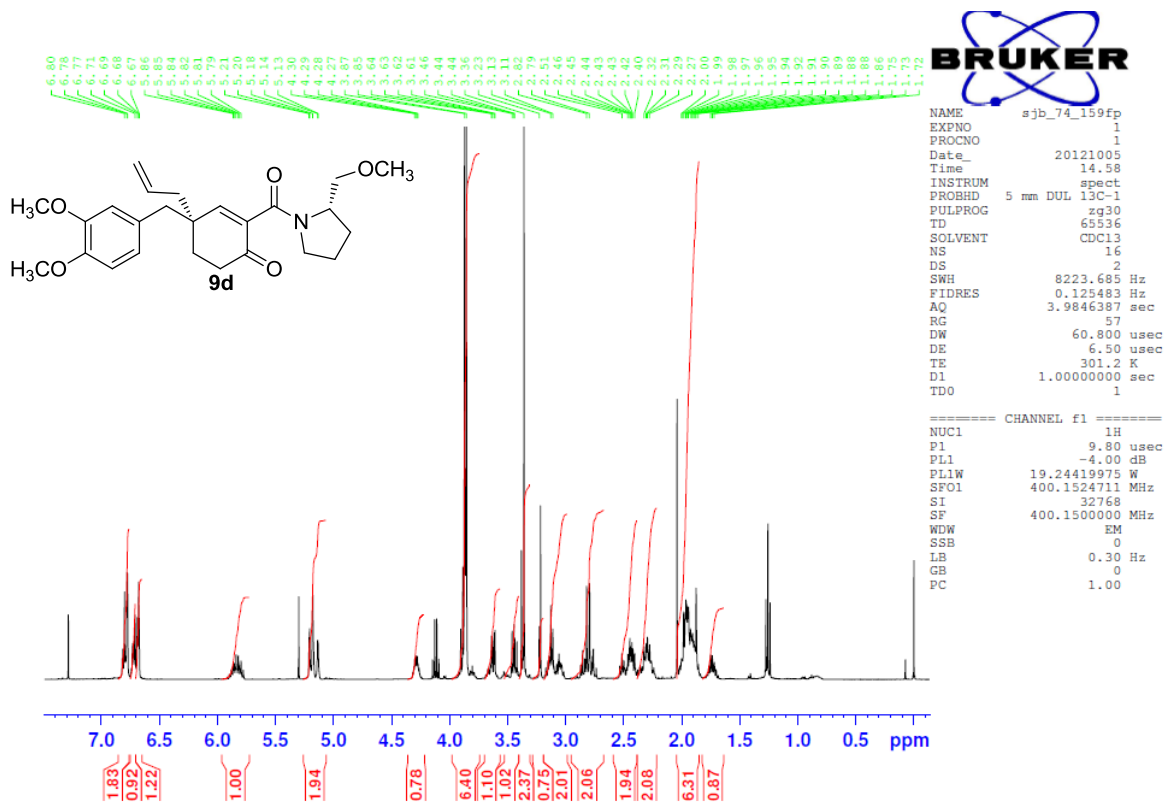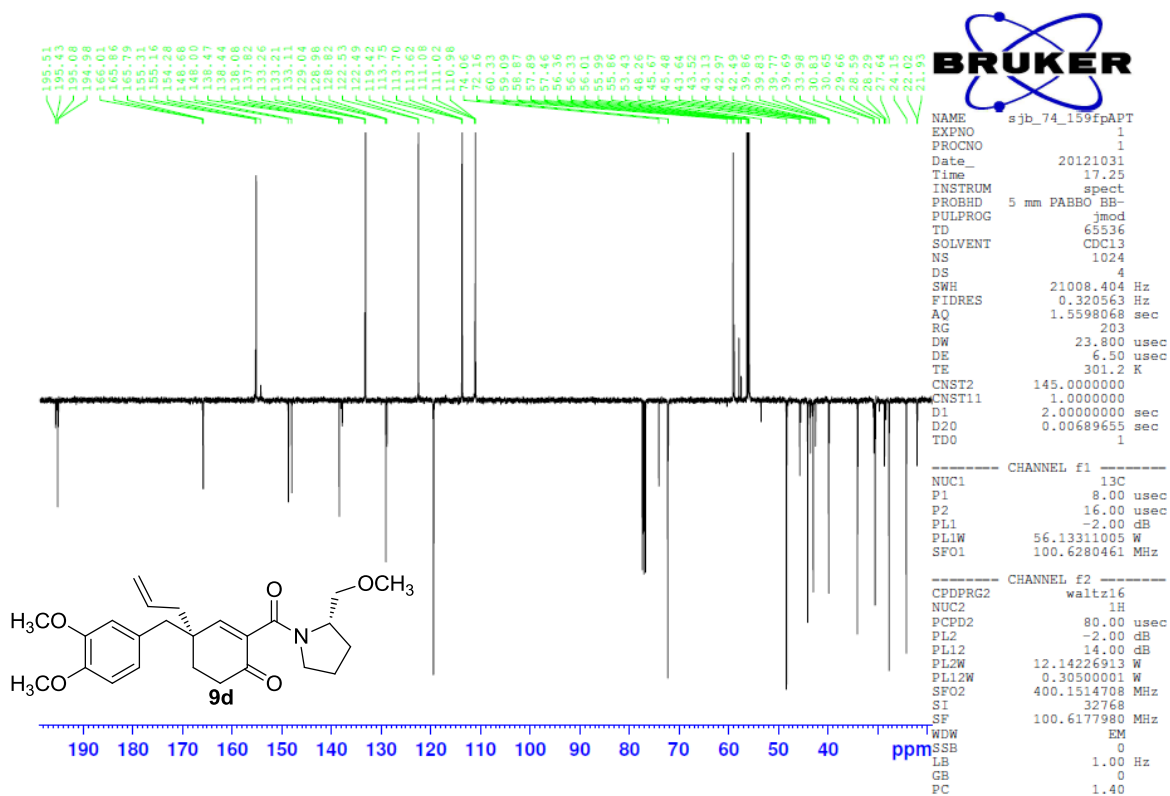

Area Percent Report

Data Path : C:\msdchem\1\DATA\  
Data File : sjb\_74\_159fp.D  
Acq On : 5 Oct 2012 11:58  
Operator : th  
Sample : sjb\_74\_159fp  
Misc :  
ALS Vial : 15 Sample Multiplier: 1

Integration Parameters: autoint1.e  
Integrator: ChemStation

Method : C:\msdchem\1\METHODS\JMB2.m  
Title :

Signal : TIC: sjb\_74\_159fp.D\data.ms

| peak # | R.T. min | first scan | max scan | last scan | PK TY | peak height | corr. area | corr. % max. | % of total |
|--------|----------|------------|----------|-----------|-------|-------------|------------|--------------|------------|
| 1      | 17.904   | 2102       | 2328     | 2412      | VV    | 3198330     | 432129853  | 100.00%      | 96.605%    |
| 2      | 18.426   | 2412       | 2419     | 2438      | VV    | 47849       | 3098396    | 0.72%        | 0.693%     |
| 3      | 18.584   | 2438       | 2447     | 2477      | VV    | 50012       | 4349060    | 1.01%        | 0.972%     |
| 4      | 18.911   | 2477       | 2504     | 2546      | VV    | 88199       | 7737920    | 1.79%        | 1.730%     |

Sum of corrected areas: 447315230

JMB2.m Mon Nov 12 09:56:25 2012

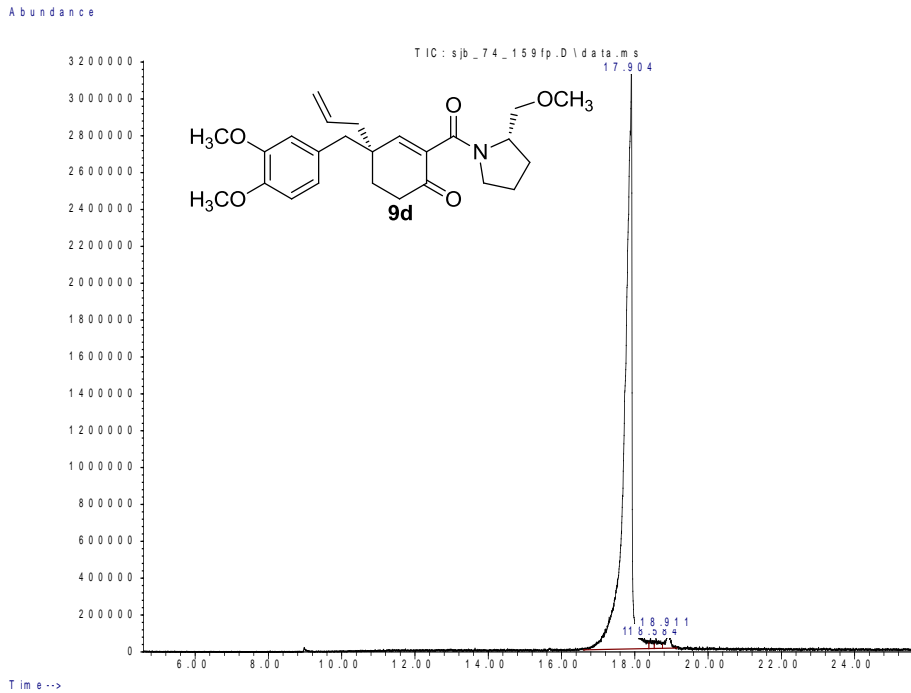

Abundance

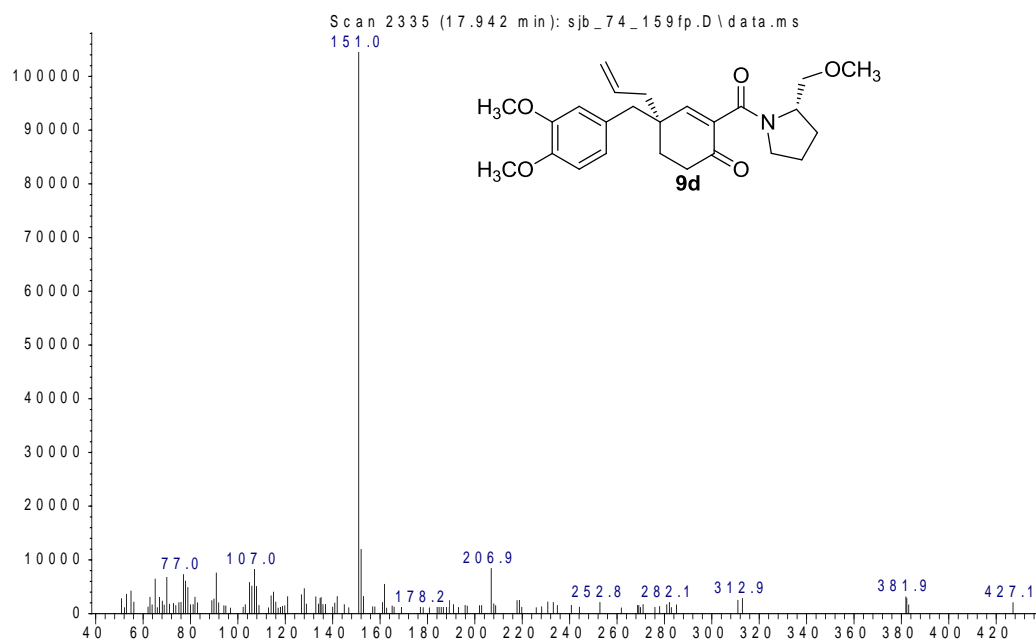

m/z-->

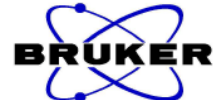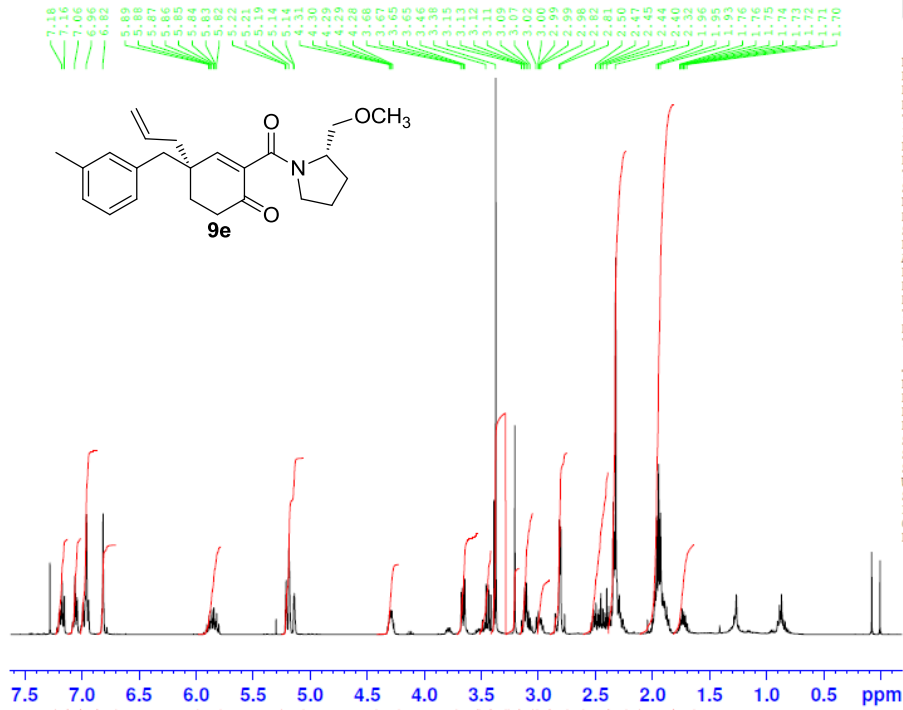

```

NAME      sjb_77_146fp
EXPNO     1
PROCNO    1
Date_     20130711
Time      12.06
INSTRUM   spect
PROBHD    5 mm PABBO BB-
PULPROG   zg30
TD         65536
SOLVENT   CDCl3
NS         16
DS         2
SWH        8223.685 Hz
FIDRES     0.125483 Hz
AQ         3.9846387 sec
RG         45.2
DW         60.800 usec
DE         6.50 usec
TE         301.2 K
D1         1.0000000 sec
TD0        1

----- CHANNEL f1 -----
NUC1      1H
P1        12.50 usec
PL1       -2.00 dB
PL1W      12.14226913 W
SFO1      400.1524711 MHz
SI         32768
SF         400.1500000 MHz
WDW        EM
SSB        0
LB         0.30 Hz
GB         0
PC         1.00
  
```

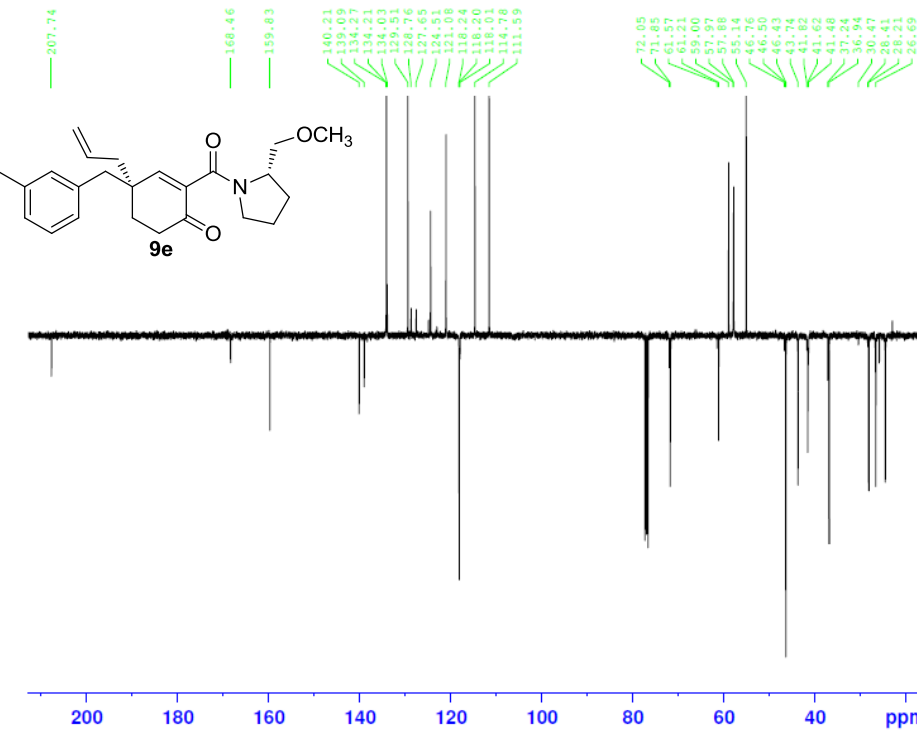

```

Current Data Parameters
NAME      sjb_77_145fp APT
EXPNO     1
PROCNO    1

F2 - Acquisition Parameters
Date_     20130717
Time      8.49
INSTRUM   spect
PROBHD    5 mm PABBO BB-
PULPROG   jmod
TD         65536
SOLVENT   CDCl3
NS         1024
DS         4
SWH        24038.461 Hz
FIDRES     0.366798 Hz
AQ         1.3631488 sec
RG         203
DW         20.800 usec
DE         6.50 usec
TE         301.2 K
CNST2     145.0000000
CNST11    1.0000000
D1         2.0000000 sec
D20        0.00689655 sec
TD0        1

----- CHANNEL f1 -----
NUC1      13C
P1         8.00 usec
P2        16.00 usec
PL1       -2.00 dB
PL1W      56.13311005 W
SFO1      100.6278593 MHz

----- CHANNEL F2 -----
CPDPRG[2] waltz16
NUC2       1H
PCPD2     80.00 usec
PL2       -2.00 dB
PL12      14.00 dB
PL2W      12.14226913 W
PL12W     0.30500001 W
SFO2      400.1515122 MHz

F2 - Processing parameters
SI         32768
SF         100.6177980 MHz
WDW        EM
SSB        0
LB         1.00 Hz
GB         0
PC         1.40
  
```

Data Path : C:\msdchem\1\DATA\  
 Data File : sjb\_77\_146fp.D  
 Acq On : 11 Jul 2013 12:27  
 Operator : sjb  
 Sample : sjb\_77\_146fp  
 Misc :  
 ALS Vial : 90 Sample Multiplier: 1

Integration Parameters: autoint1.e  
 Integrator: ChemStation

Method : C:\msdchem\1\METHODS\ckr3.m  
 Title :

Signal : TIC: sjb\_77\_146fp.D\data.ms

| peak # | R.T. min | first scan | max scan | last scan | PK TY | peak height | corr. area | corr. % max. | % of total |
|--------|----------|------------|----------|-----------|-------|-------------|------------|--------------|------------|
| 1      | 12.936   | 1458       | 1460     | 1472      | VV 7  | 10298       | 425396     | 0.53%        | 0.517%     |
| 2      | 13.053   | 1472       | 1481     | 1482      | VV 7  | 13961       | 373159     | 0.47%        | 0.453%     |
| 3      | 13.076   | 1482       | 1485     | 1487      | VV 4  | 15082       | 220310     | 0.28%        | 0.268%     |
| 4      | 13.506   | 1487       | 1560     | 1603      | VV 2  | 1898200     | 79627101   | 100.00%      | 96.706%    |
| 5      | 13.762   | 1603       | 1604     | 1613      | VV 8  | 19689       | 462440     | 0.58%        | 0.562%     |
| 6      | 13.823   | 1613       | 1615     | 1623      | VV 4  | 16918       | 402255     | 0.51%        | 0.489%     |
| 7      | 13.991   | 1635       | 1645     | 1661      | VV 10 | 21265       | 829057     | 1.04%        | 1.007%     |

Sum of corrected areas: 82339717 ckr3.m Wed Mar 19 14:38:32 2014

Abundance

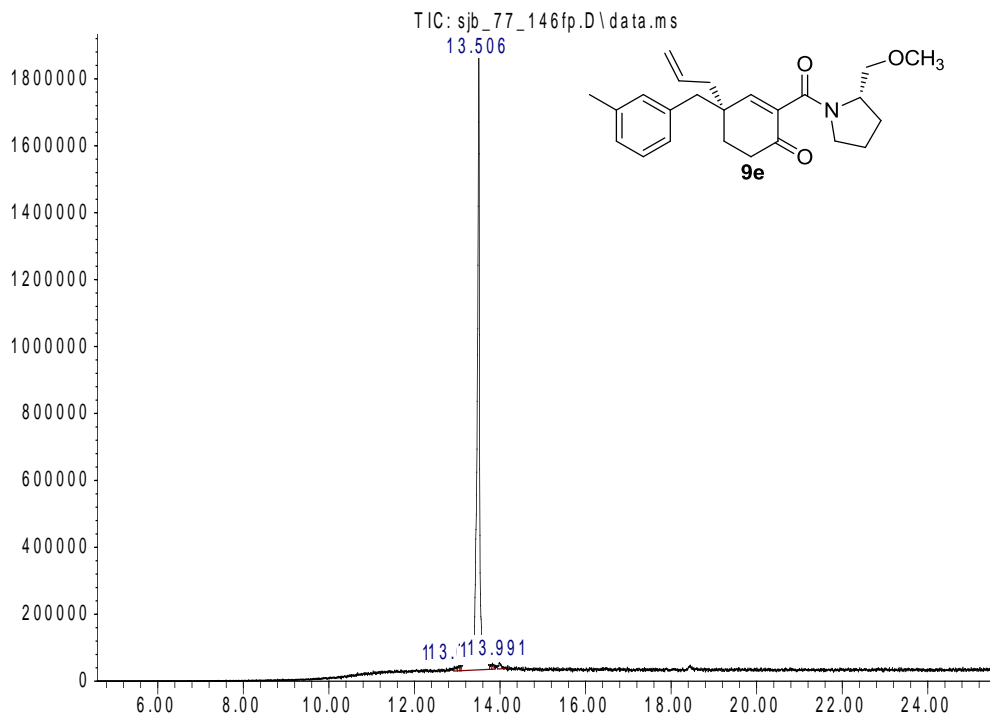

Time-->

Abundance

Scan 1552 (13.462 min): sjb\_77\_146fp.D\data.ms

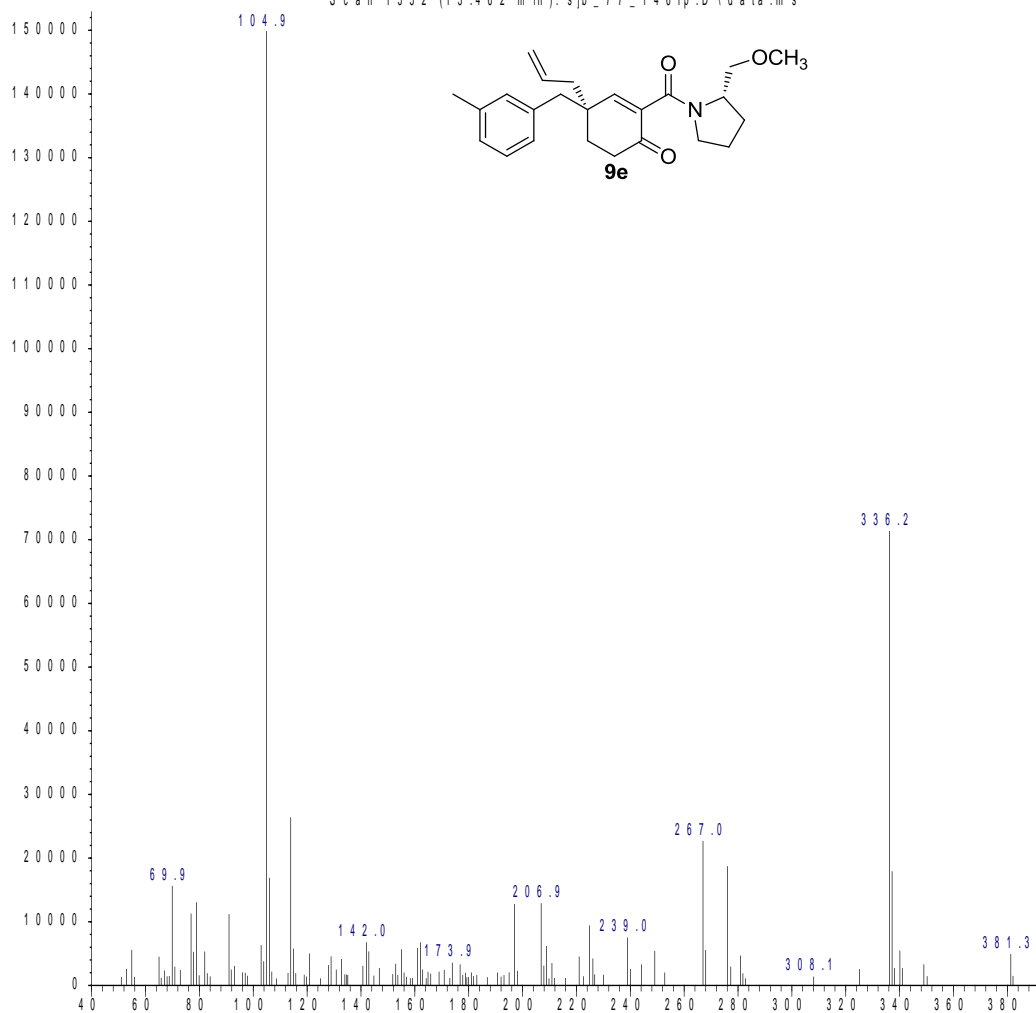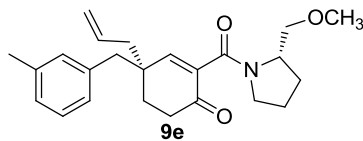

m/z-->

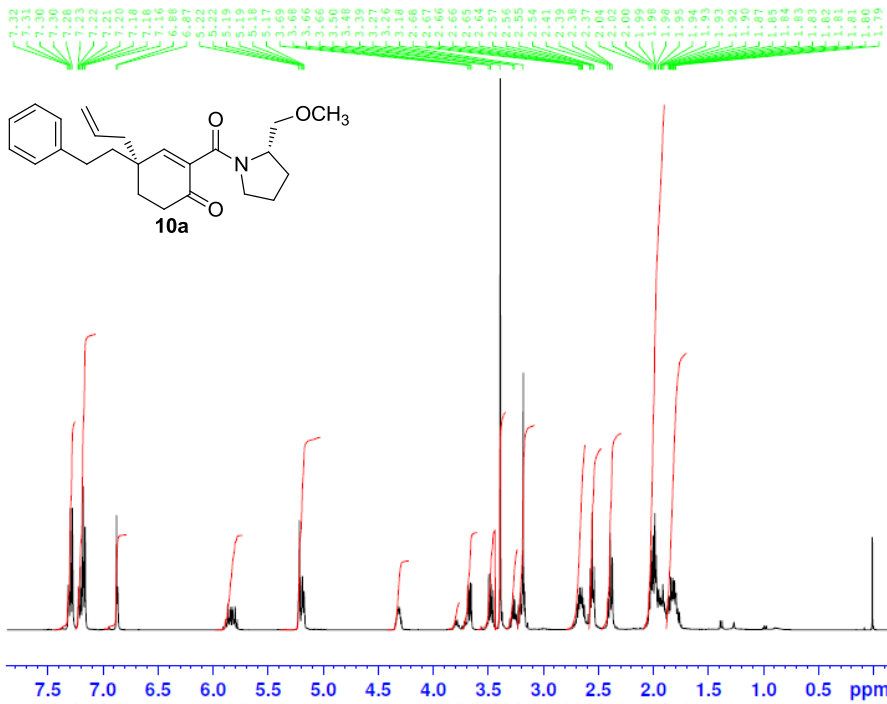

**BRUKER**

```

NAME      sjb_72_132fp take 2
EXPNO    1
PROCNO   1
Date_    20130801
Time     11.14
INSTRUM  spect
PROBHD   5 mm PABBO BB-
PULPROG  zg30
TD        65536
SOLVENT  CDCl3
NS        16
DS        2
SWH      8223.685 Hz
FIDRES   0.125483 Hz
AQ        3.9846387 sec
RG        50.8
DW        60.800 usec
DE        6.50 usec
TE        301.2 K
D1        1.00000000 sec
TDO       1

----- CHANNEL f1 -----
NUC1     1H
P1       12.50 usec
PL1      -2.00 dB
PL1W     12.14226913 W
SFO1     400.1524711 MHz
SI       32768
SF       400.1500000 MHz
WDW      EM
SSB      0
LB       0.30 Hz
GB       0
PC       1.00

```

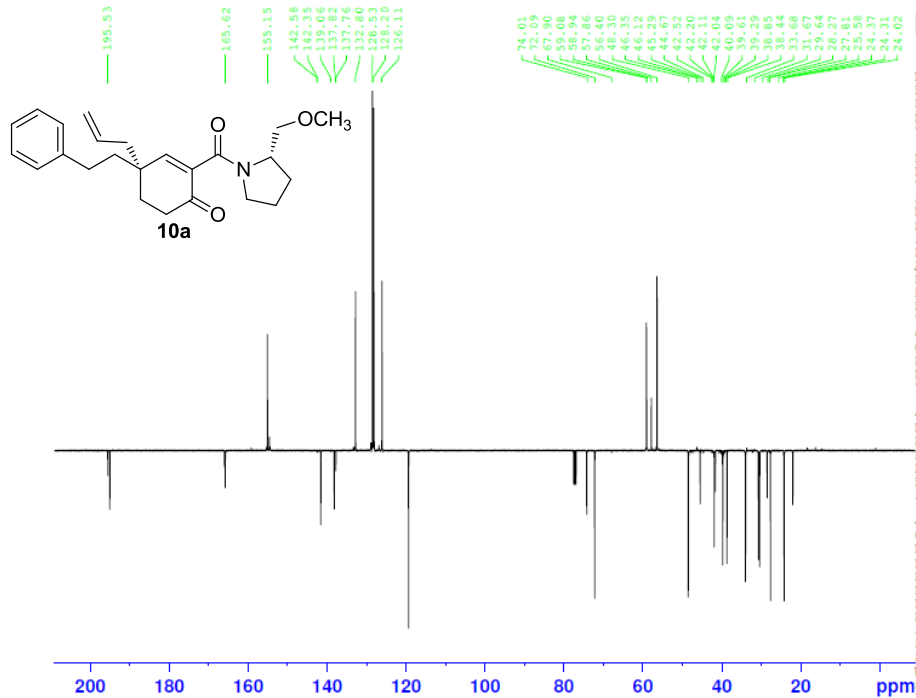

**BRUKER**

```

NAME      sjb_74_207fp APT
EXPNO    1
PROCNO   1
Date_    20121116
Time     9.22
INSTRUM  spect
PROBHD   5 mm PABBO BB-
PULPROG  jmod
TD        65536
SOLVENT  CDCl3
NS        1024
DS        4
SWH      21929.824 Hz
FIDRES   0.334523 Hz
AQ        1.4942708 sec
RG        203
DW        22.800 usec
DE        6.50 usec
TE        301.2 K
CNST2    145.0000000
CNST11   1.0000000
D1        2.00000000 sec
D20       0.00689655 sec
TDO       1

----- CHANNEL f1 -----
NUC1     13C
P1       8.00 usec
P2       16.00 usec
PL1      -2.00 dB
PL1W     56.13311005 W
SFO1     100.6278600 MHz

----- CHANNEL f2 -----
CPDPRG2  waltz16
NUC2     1H
PCPD2    80.00 usec
PL2      -2.00 dB
PL12     14.00 dB
PL1W     12.14226913 W
PL12W    0.30500001 W
SFO2     400.1514979 MHz
SI       32768
SF       100.6177980 MHz
WDW      EM
SSB      0
LB       1.00 Hz
GB       0
PC       1.40

```

Area Percent Report

Data Path : C:\msdchem\1\DATA\  
Data File : sjb\_74\_207fp.D  
Acq On : 15 Nov 2012 17:02  
Operator : sjb  
Sample : sjb\_74\_207fp  
Misc :  
ALS Vial : 5 Sample Multiplier: 1

Integration Parameters: autoint1.e  
Integrator: ChemStation

Method : C:\msdchem\1\METHODS\JMB2.m  
Title :

Signal : TIC: sjb\_74\_207fp.D\data.ms

| peak # | R.T. min | first scan | max scan | last scan | PK TY | peak height | corr. area | corr. % max. | % of total |
|--------|----------|------------|----------|-----------|-------|-------------|------------|--------------|------------|
| 1      | 9.840    | 911        | 919      | 950       | BB 3  | 122085      | 3829247    | 0.28%        | 0.261%     |
| 2      | 14.981   | 1623       | 1817     | 1838      | VV 4  | 9115287     | 1373275457 | 100.00%      | 93.615%    |
| 3      | 15.180   | 1838       | 1852     | 1921      | VV 2  | 1569203     | 89832411   | 6.54%        | 6.124%     |

Sum of corrected areas: 1466937115

JMB2.m Fri Nov 16 09:07:41 2012

Abundance

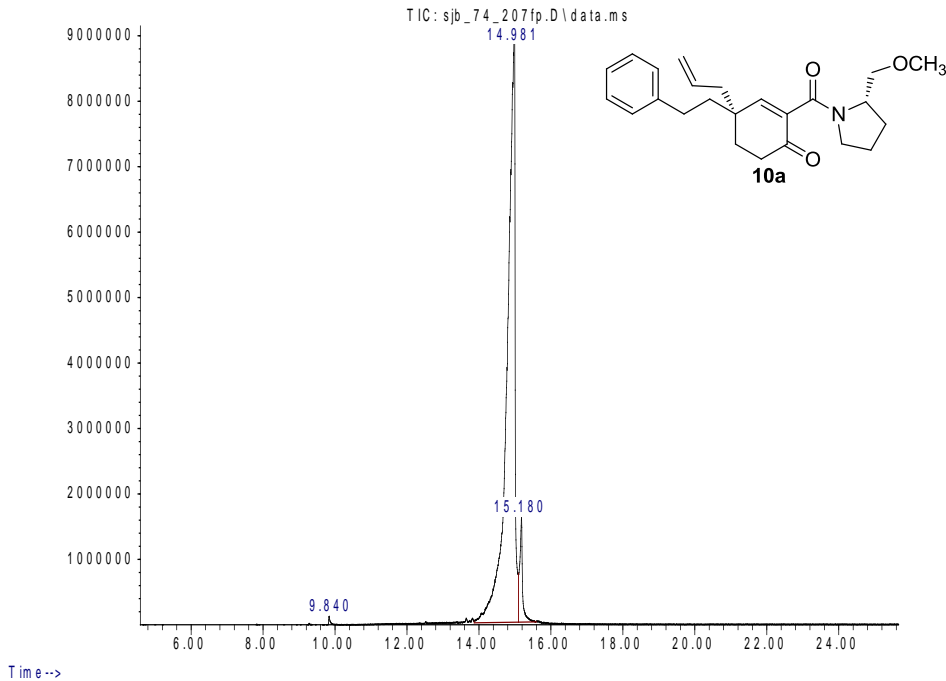



Abundance

Scan 1791 (14.829 min): sjb\_74\_207fp.D\data.ms

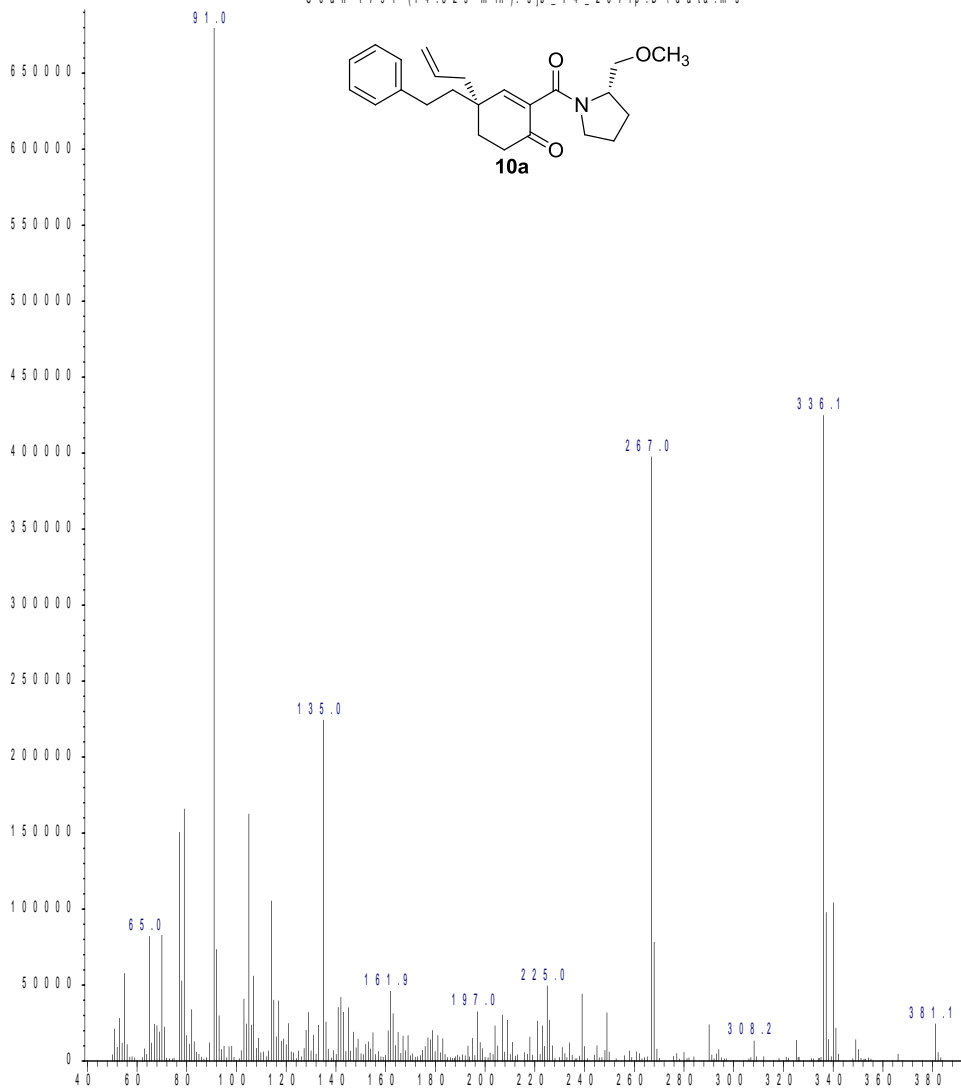

m/z-->

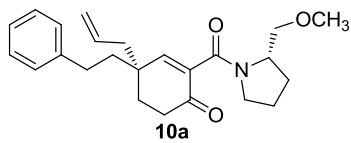

Abundance

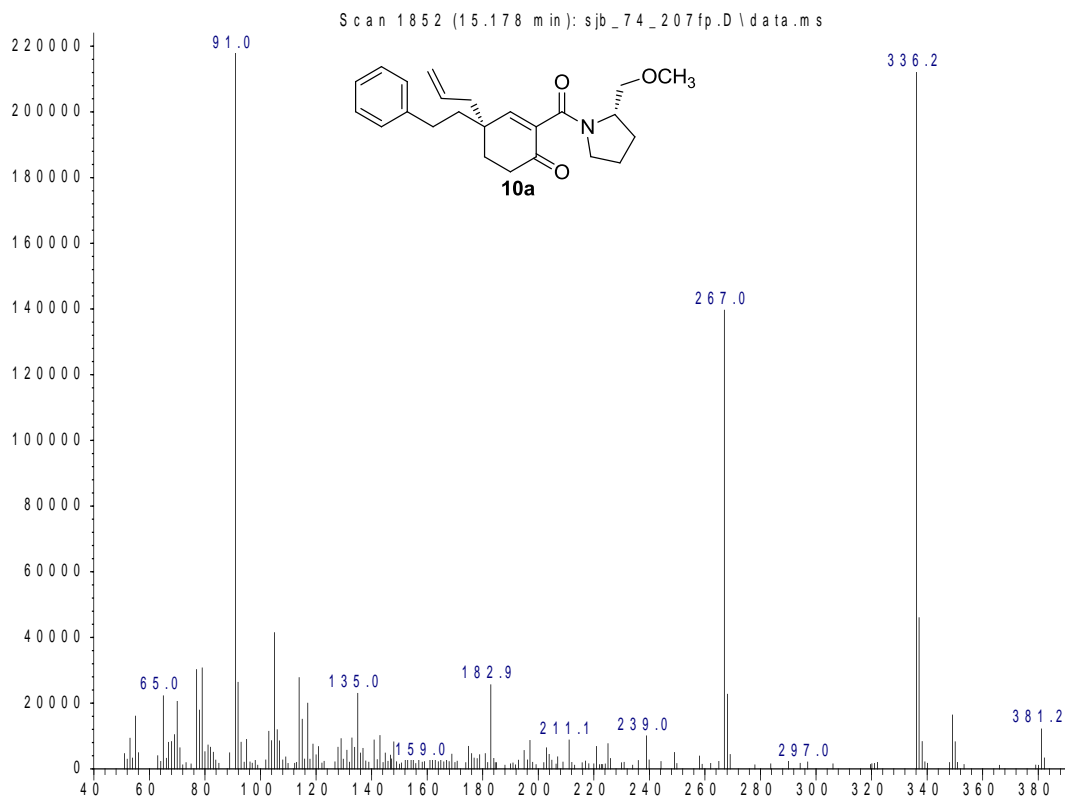

m/z-->

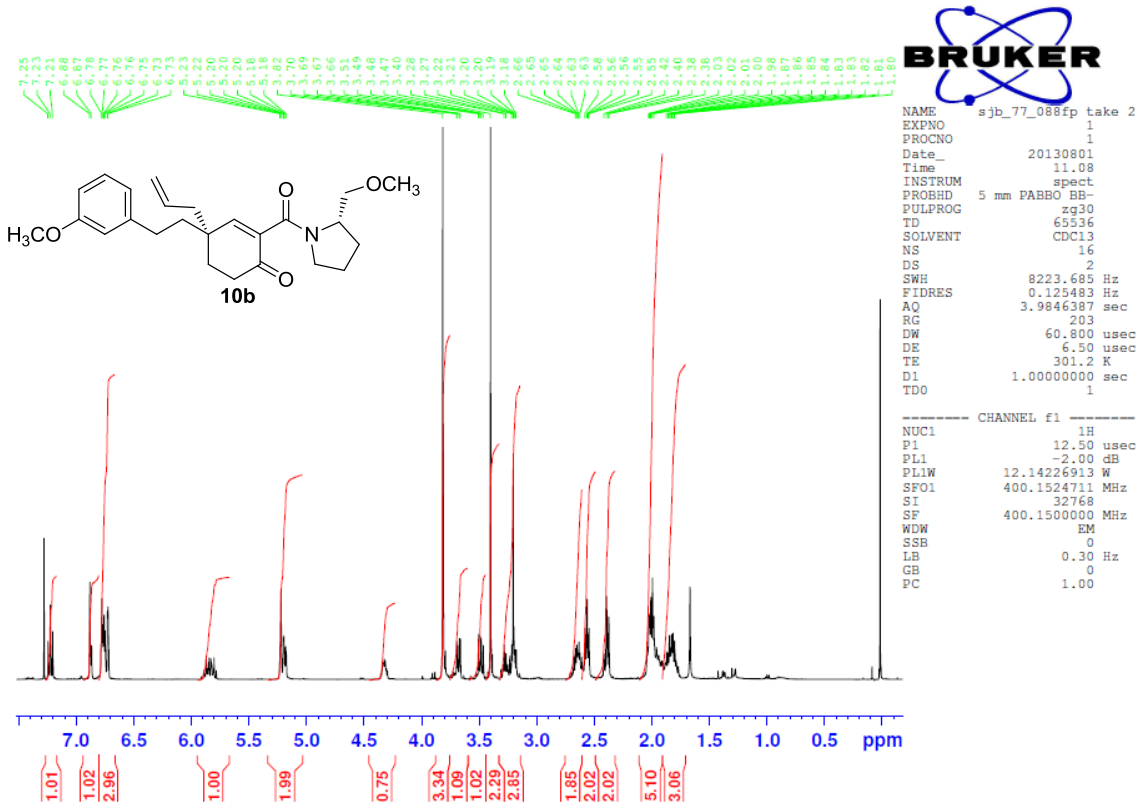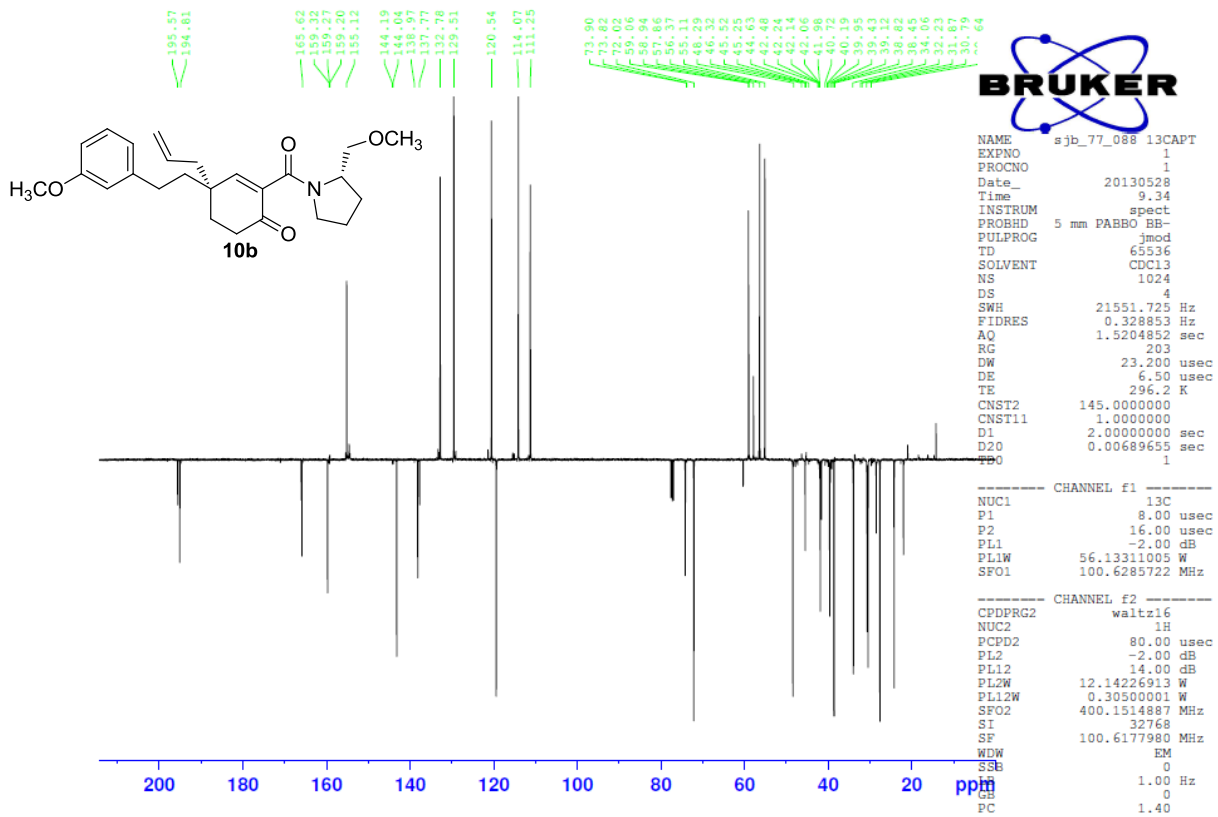

Area Percent Report

Data Path : C:\msdchem\1\DATA\  
Data File : sjb\_77\_088fp.D  
Acq On : 24 May 2013 15:37  
Operator : sjb  
Sample : sjb\_77\_088fp  
Misc :  
ALS Vial : 90 Sample Multiplier: 1

Integration Parameters: autoint1.e  
Integrator: ChemStation

Method : C:\msdchem\1\5973N\PRECISION.M  
Title :

Signal : TIC: sjb\_77\_088fp.D\data.ms

| peak # | R.T. min | first scan | max scan | last scan | PK TY | peak height | corr. area | corr. % max. | % of total |
|--------|----------|------------|----------|-----------|-------|-------------|------------|--------------|------------|
| 1      | 16.585   | 2091       | 2098     | 2102      | VV 10 | 48273       | 1551911    | 0.12%        | 0.068%     |
| 2      | 16.631   | 2102       | 2106     | 2108      | VV 5  | 53733       | 828375     | 0.06%        | 0.036%     |
| 3      | 16.680   | 2108       | 2114     | 2116      | VV 7  | 59458       | 1463538    | 0.11%        | 0.064%     |
| 4      | 16.701   | 2116       | 2118     | 2121      | VV 4  | 69019       | 1154890    | 0.09%        | 0.051%     |
| 5      | 16.748   | 2121       | 2126     | 2128      | VV 6  | 78916       | 1822704    | 0.14%        | 0.080%     |
| 6      | 16.843   | 2128       | 2143     | 2144      | VV 6  | 121092      | 5451740    | 0.42%        | 0.239%     |
| 7      | 17.949   | 2144       | 2336     | 2337      | VV 4  | 7155601     | 1309161021 | 100.00%      | 57.386%    |
| 8      | 18.023   | 2337       | 2349     | 2413      | VV 4  | 8170841     | 805405891  | 61.52%       | 35.304%    |
| 9      | 18.508   | 2413       | 2434     | 2507      | VV 4  | 1622052     | 154484566  | 11.80%       | 6.772%     |

Sum of corrected areas: 2281324637

Abundance

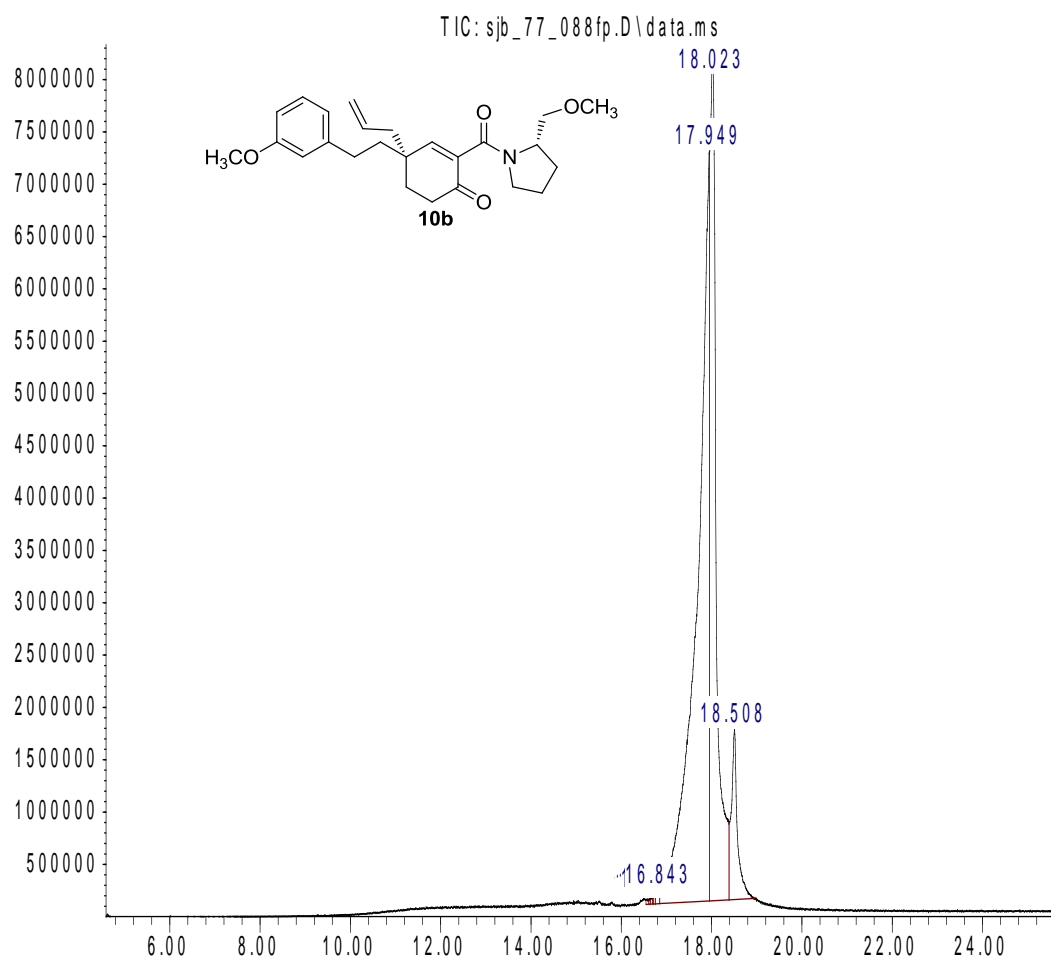

Time-->

Abundance

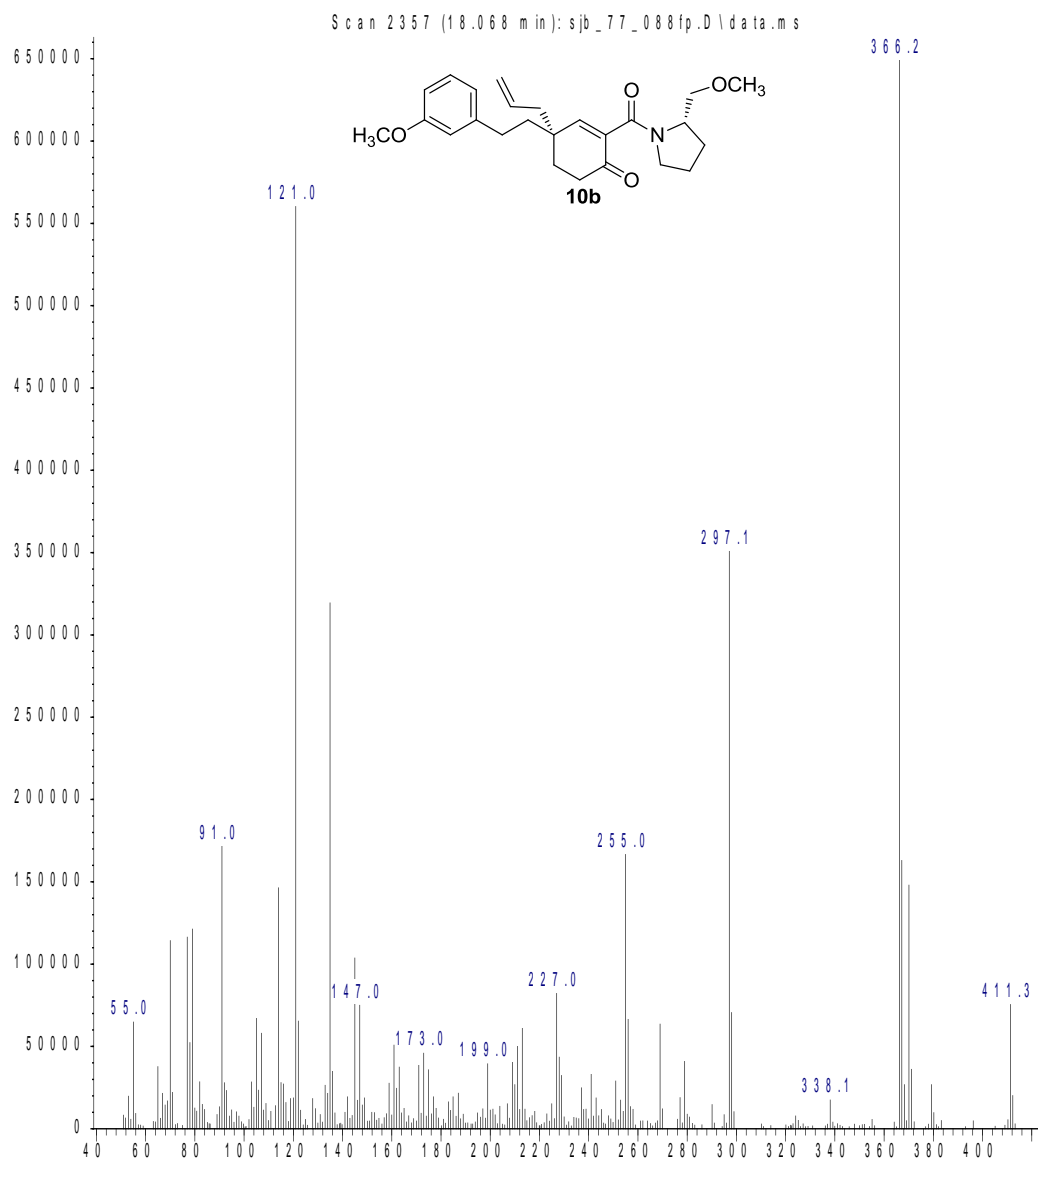

Abundance

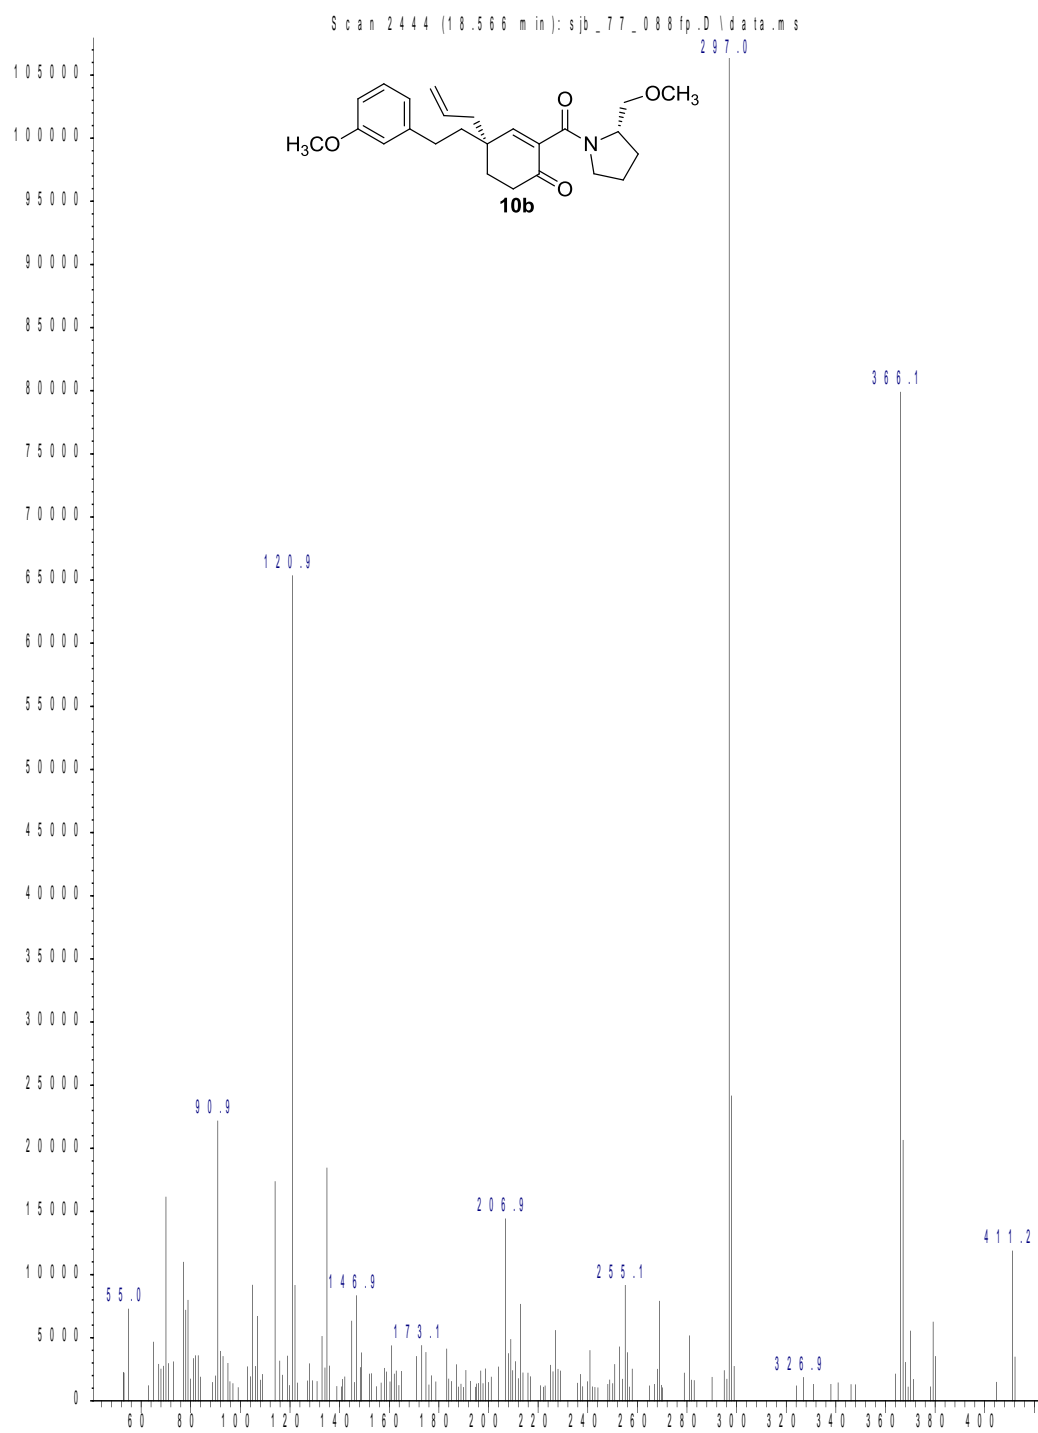

m/z-->

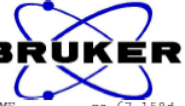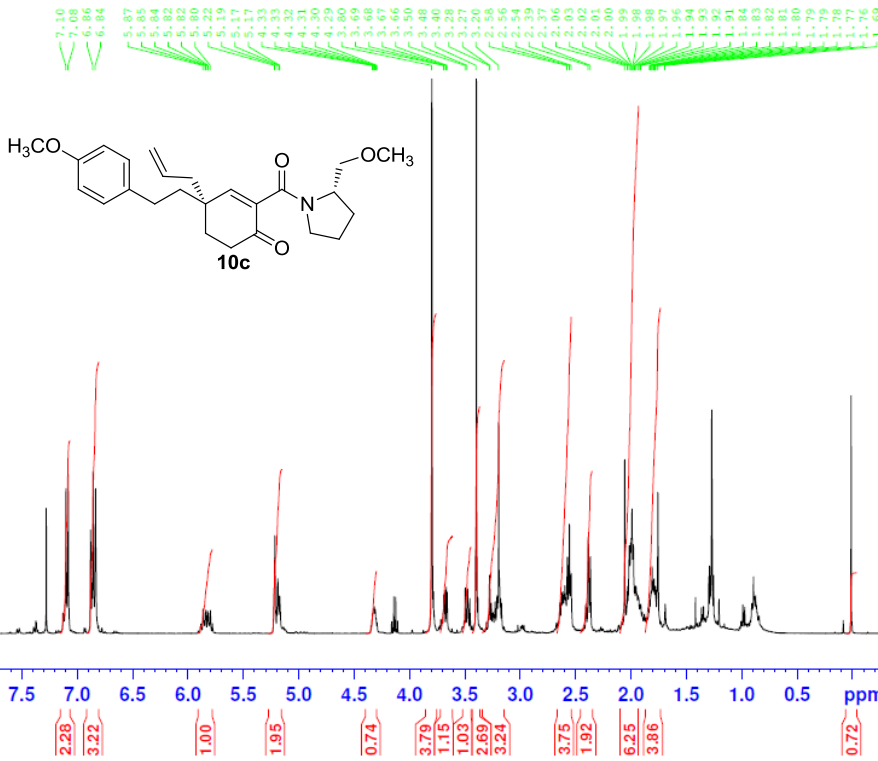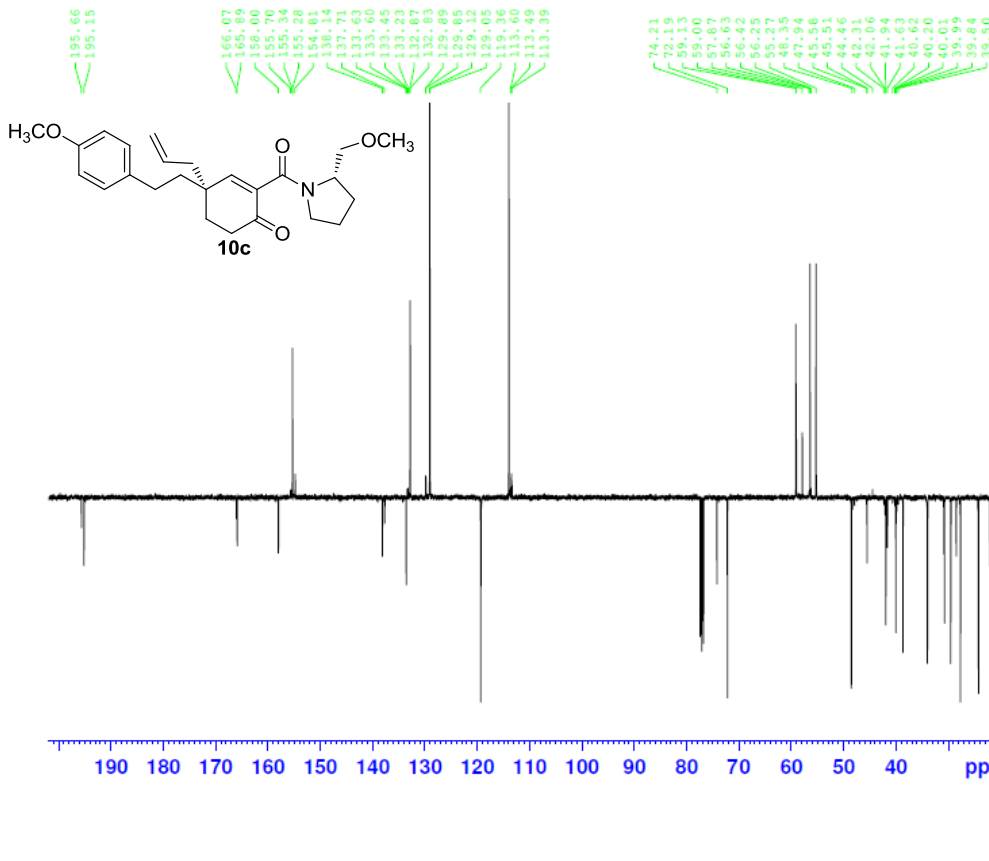



Area Percent Report

Data Path : C:\msdchem\1\DATA\  
Data File : sjb\_77\_224fp2.D  
Acq On : 24 Sep 2013 11:10  
Operator : sjb  
Sample : sjb\_77\_224fp2  
Misc :  
ALS Vial : 90 Sample Multiplier: 1

Integration Parameters: autoint1.e  
Integrator: ChemStation

Method : C:\msdchem\1\METHODS\ckr3.m  
Title :

Signal : TIC: sjb\_77\_224fp2.D\data.ms

| peak # | R.T. min | first scan | max scan | last scan | PK TY | peak height | corr. area | corr. % max. | % of total |
|--------|----------|------------|----------|-----------|-------|-------------|------------|--------------|------------|
| 1      | 17.080   | 2166       | 2184     | 2195      | PV 5  | 5922        | 119715     | 0.06%        | 0.053%     |
| 2      | 18.690   | 2249       | 2466     | 2513      | VV 4  | 1027532     | 212733185  | 100.00%      | 94.455%    |
| 3      | 19.059   | 2513       | 2530     | 2589      | VV 2  | 146573      | 12368129   | 5.81%        | 5.492%     |

Sum of corrected areas: 225221029

ckr3.m Wed Mar 19 12:16:28 2014

Abundance

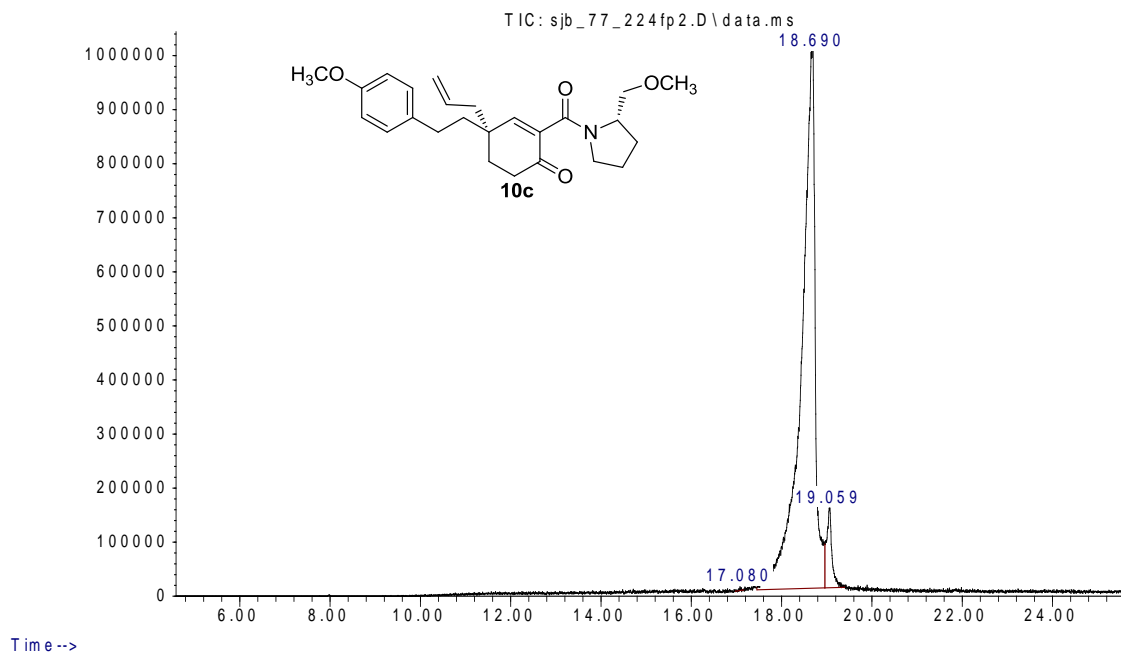

Abundance

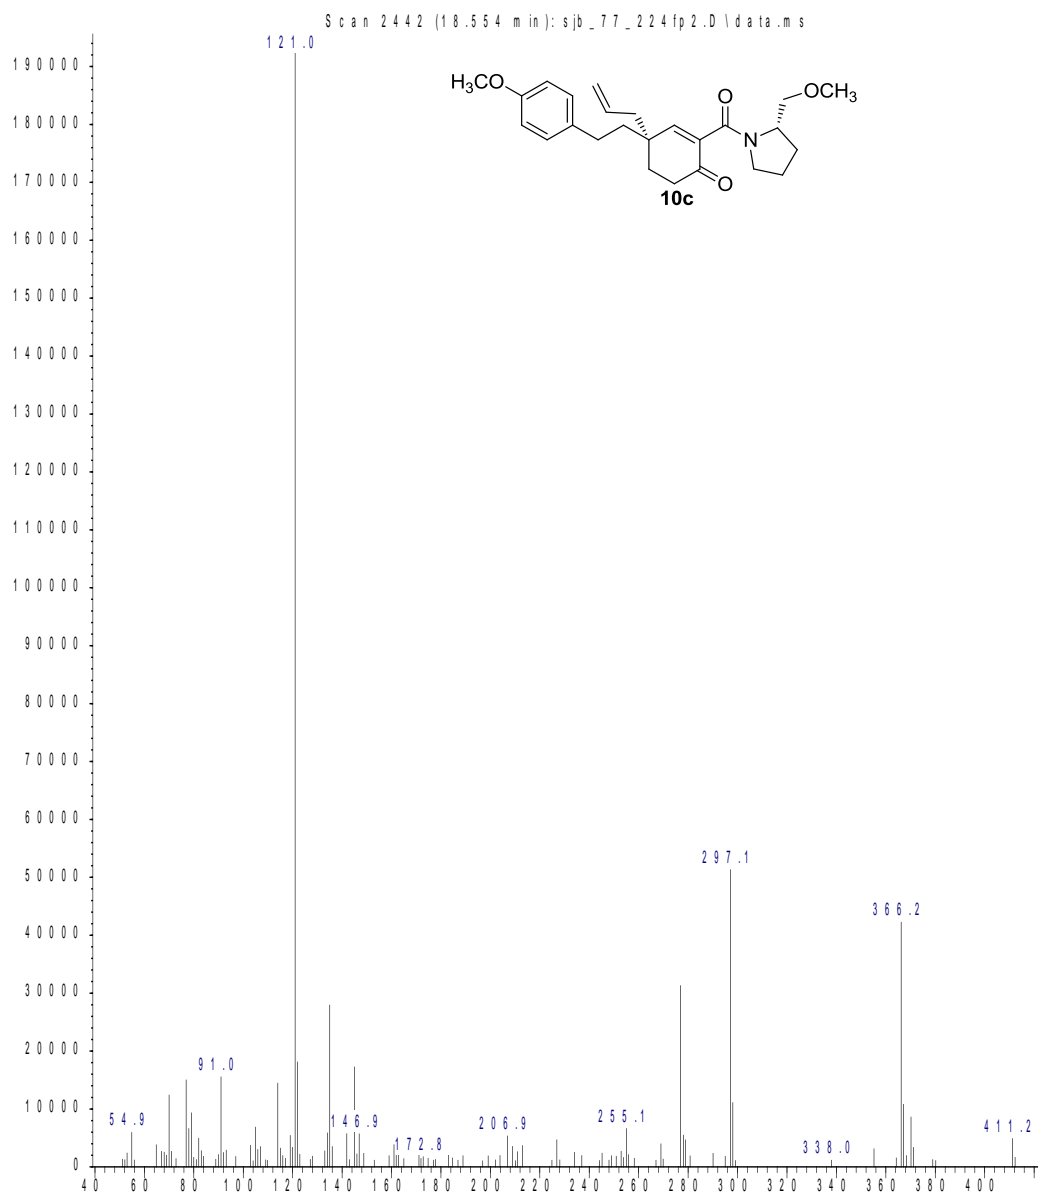

m/z-->

Abundance

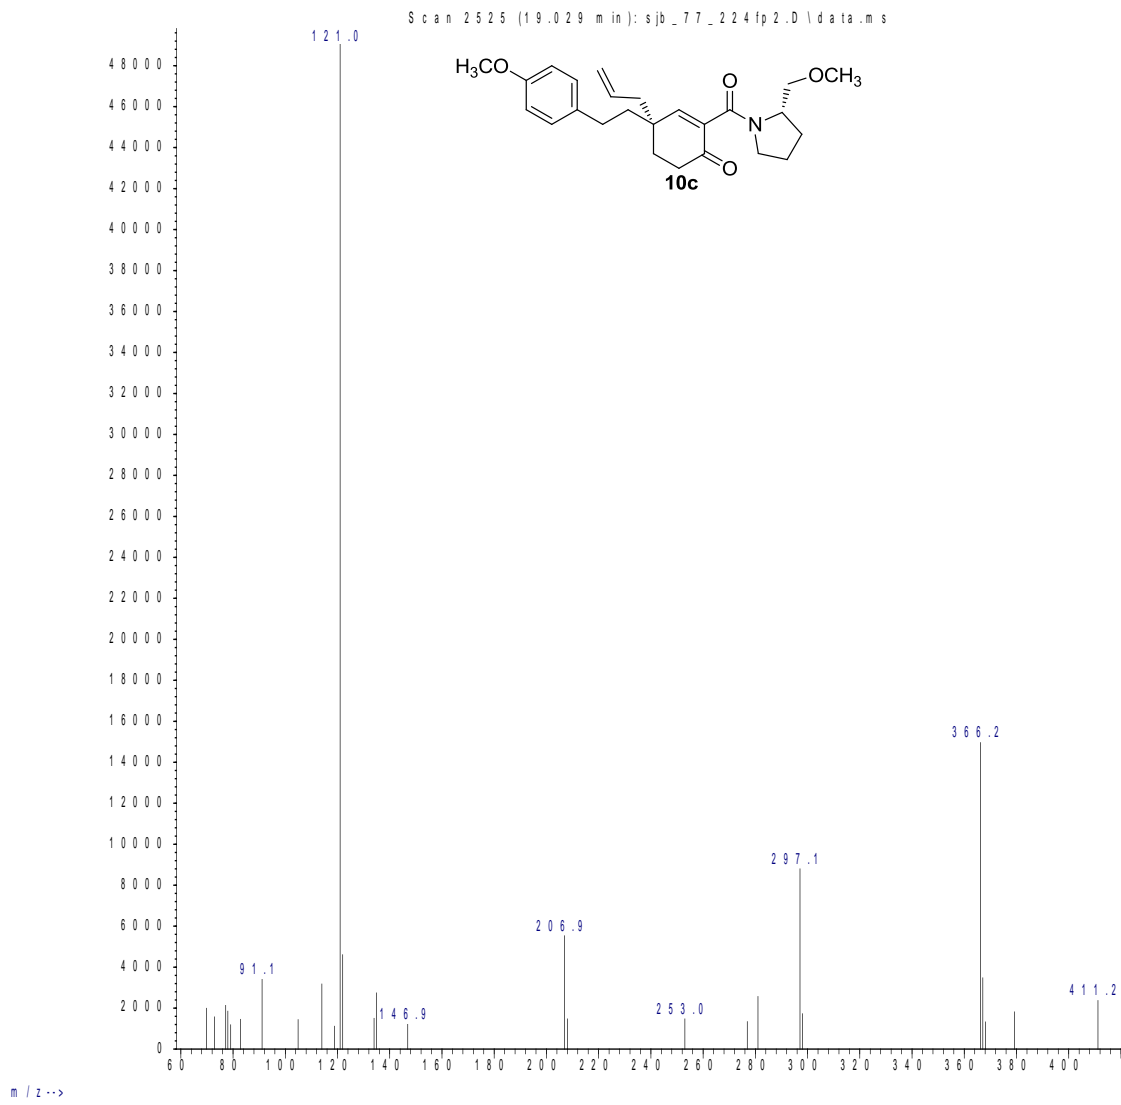

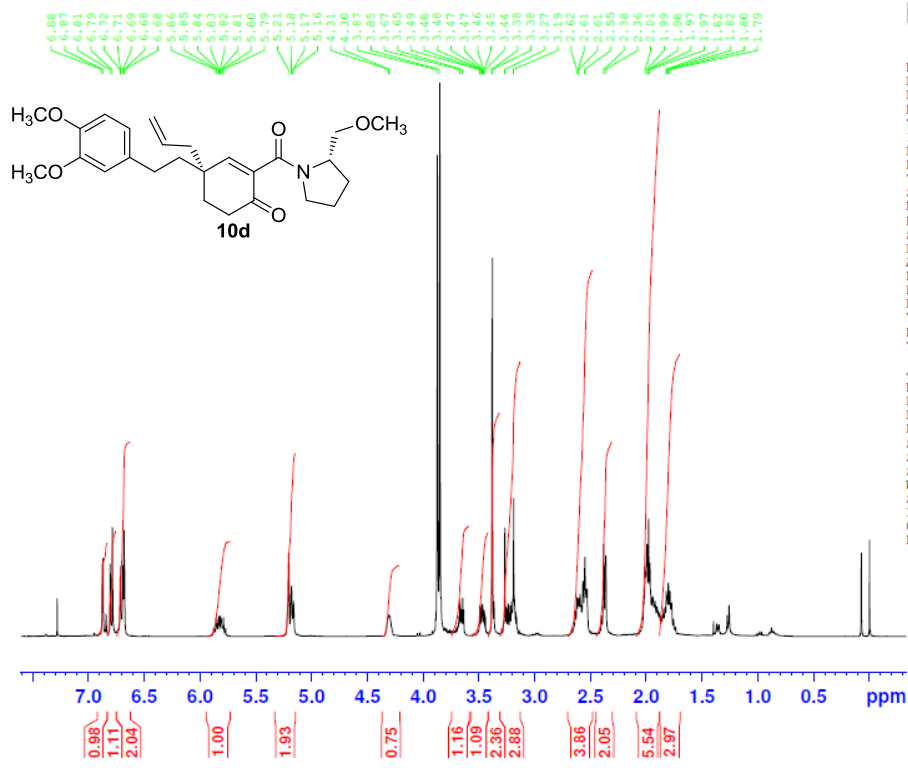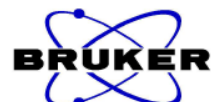

```

NAME      sjb_74_219fp take 2
EXPNO    1
PROCNO   1
Date_    20130801
Time     10.27
INSTRUM  spect
PROBHD   5 mm PABBO BB-
PULPROG  zg30
TD        65536
SOLVENT  CDCl3
NS        16
DS        2
SWH       8223.685 Hz
FIDRES    0.125483 Hz
AQ        3.9846387 sec
RG        50.8
DW        60.800 usec
DE        6.50 usec
TE        301.2 K
D1        1.00000000 sec
TDO       1
  
```

```

----- CHANNEL f1 -----
NUC1      1H
P1        12.50 usec
PL1       -2.00 dB
PL1W      12.14226913 W
SFO1      400.1524711 MHz
SI        32768
SF        400.1500000 MHz
WDW       EM
SSB       0
LB        0.30 Hz
GB        0
PC        1.00
  
```

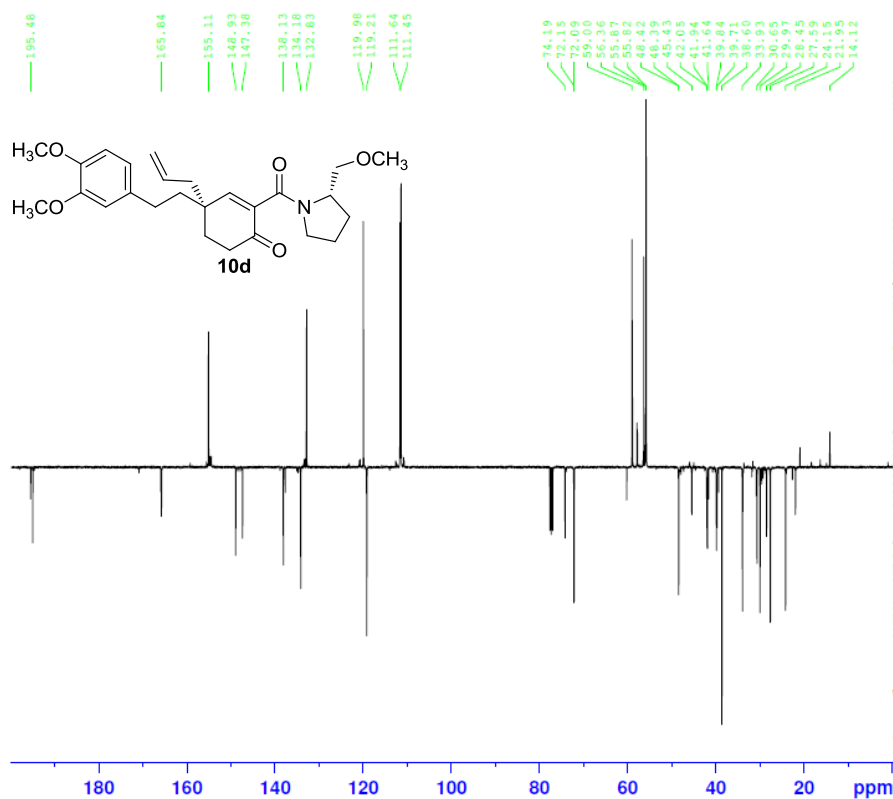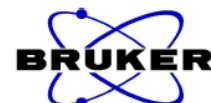

```

NAME      sjb_74_219fp APT
EXPNO    1
PROCNO   1
Date_    20121204
Time     13.18
INSTRUM  spect
PROBHD   5 mm PABBO BB-
PULPROG  jmod
TD        65536
SOLVENT  CDCl3
NS        1024
DS        4
SWH       20380.436 Hz
FIDRES    0.310981 Hz
AQ        1.6078665 sec
RG        203
DW        24.533 usec
DE        6.50 usec
TE        301.2 K
CNST2    145.0000000
CNST11   1.0000000
D1        2.00000000 sec
D20      0.00689655 sec
TDO       1
  
```

```

----- CHANNEL f1 -----
NUC1      13C
P1        8.00 usec
P2        16.00 usec
PL1       -2.00 dB
PL1W      56.13311005 W
SFO1      100.6277079 MHz
  
```

```

----- CHANNEL f2 -----
CPDPRG2  waltz16
NUC2      1H
PCPD2    80.00 usec
PL2       -2.00 dB
PL12     14.00 dB
PL2W     12.14226913 W
PL12W    0.30500001 W
SFO2     400.1514166 MHz
SI        32768
SF        100.6177980 MHz
WDW       EM
SSB       0
LB        1.00 Hz
GB        0
PC        1.40
  
```

Area Percent Report

Data Path : C:\msdchem\1\DATA\  
Data File : sjb\_77\_178fp.D  
Acq On : 13 Aug 2013 14:33  
Operator : sjb  
Sample : sjb\_77\_178fp  
Misc :  
ALS Vial : 100 Sample Multiplier: 1

Integration Parameters: autoint1.e  
Integrator: ChemStation

Method : C:\msdchem\1\METHODS\ckr3.m  
Title :

Signal : TIC: sjb\_77\_178fp.D\data.ms

| peak # | R.T. min | first scan | max scan | last scan | PK TY | peak height | corr. area | corr. % max. | % of total |
|--------|----------|------------|----------|-----------|-------|-------------|------------|--------------|------------|
| 1      | 21.994   | 2744       | 3043     | 3105      | M3    | 637493      | 229798336  | 100.00%      | 92.496%    |
| 2      | 22.587   | 3108       | 3147     | 3225      | M4    | 157004      | 18641866   | 8.11%        | 7.504%     |

Sum of corrected areas: 248440203

ckr3.m Mon May 12 15:41:13 2014

Abundance

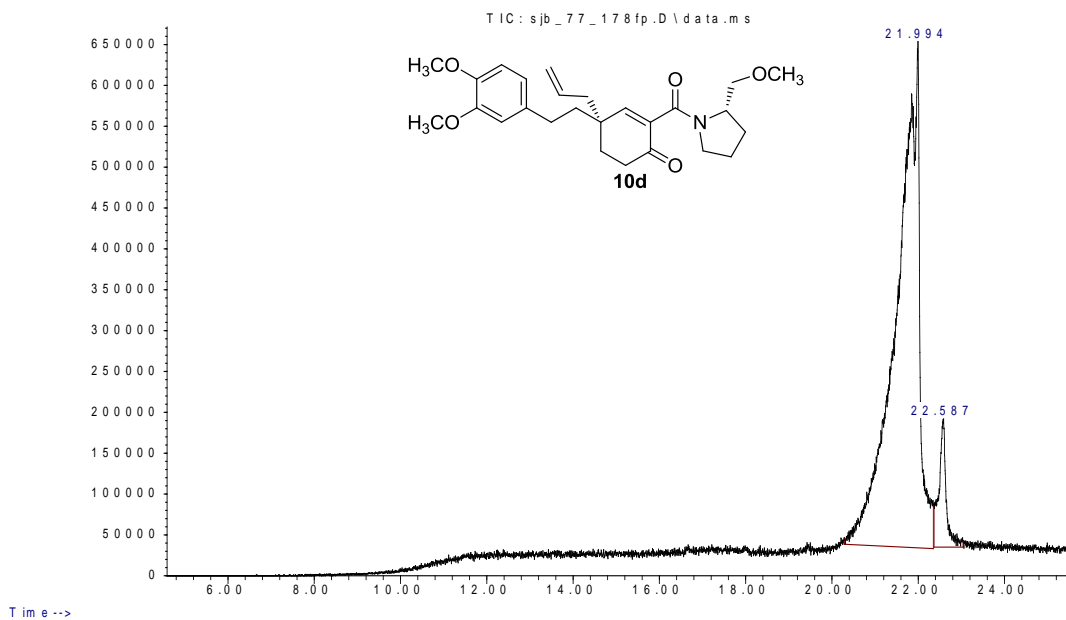

Abundance

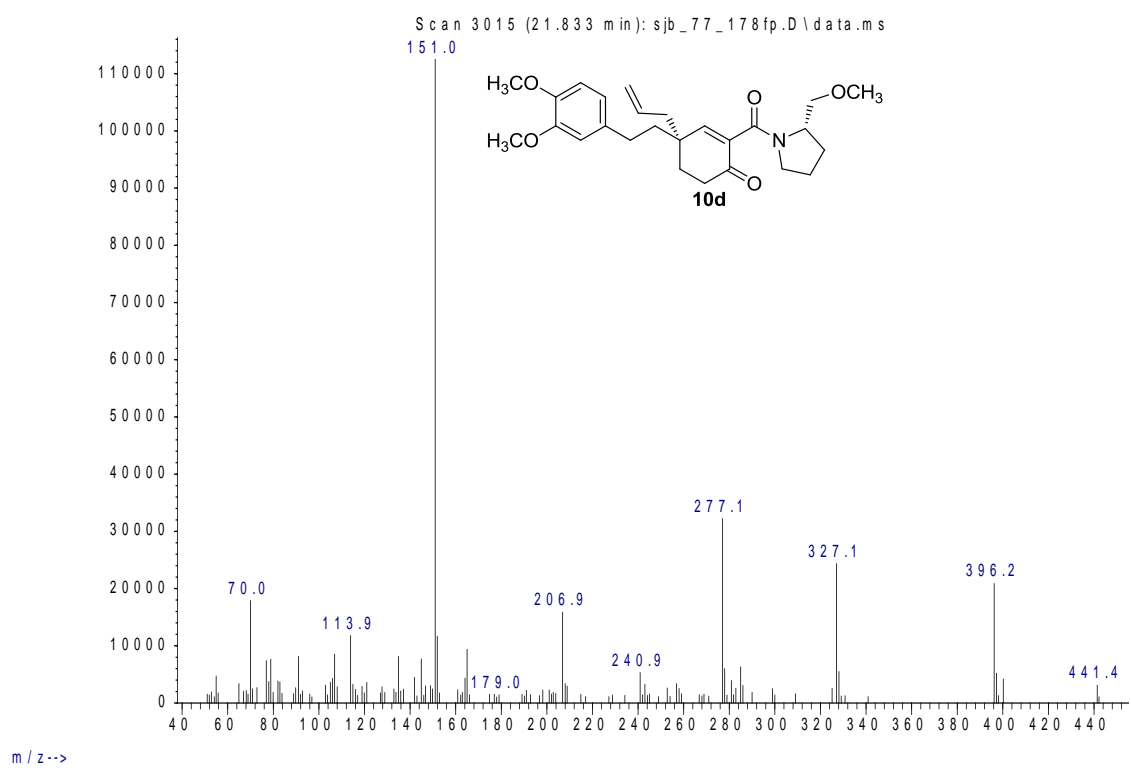

Abundance

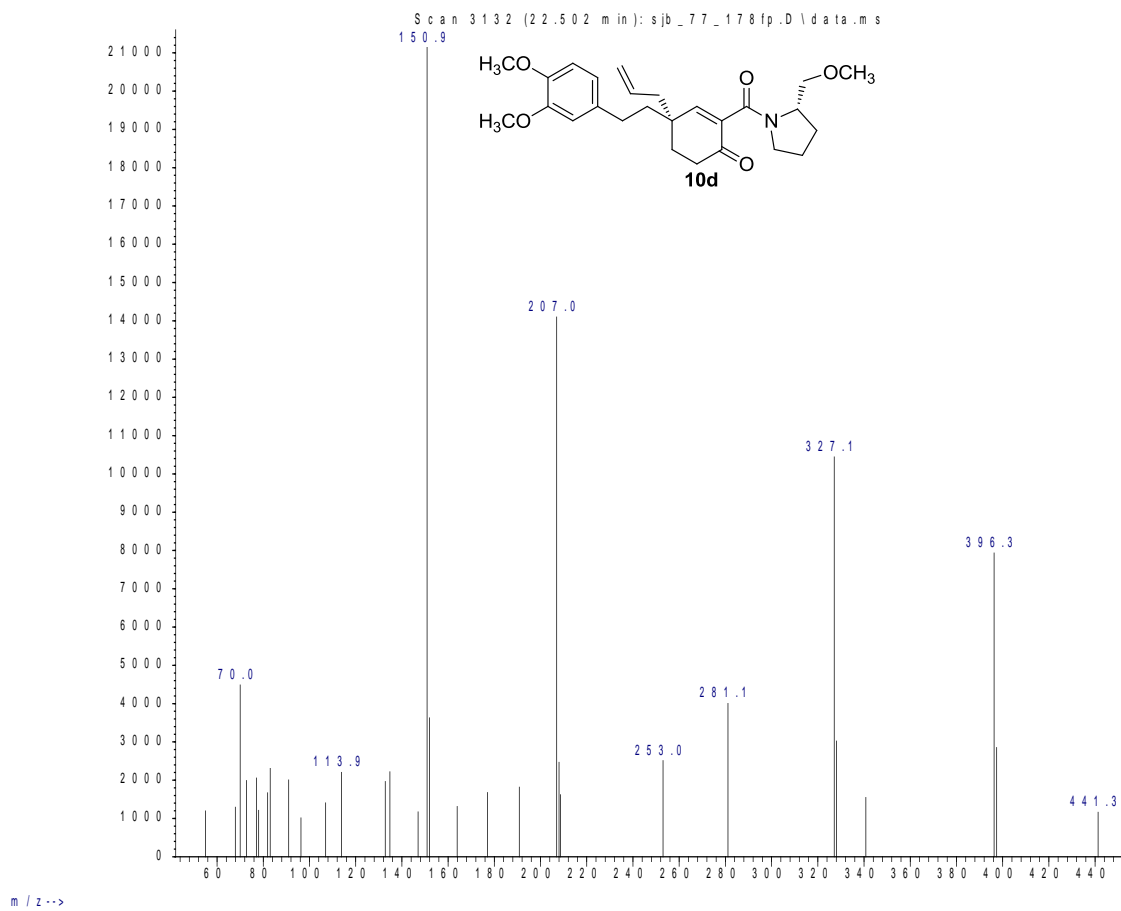

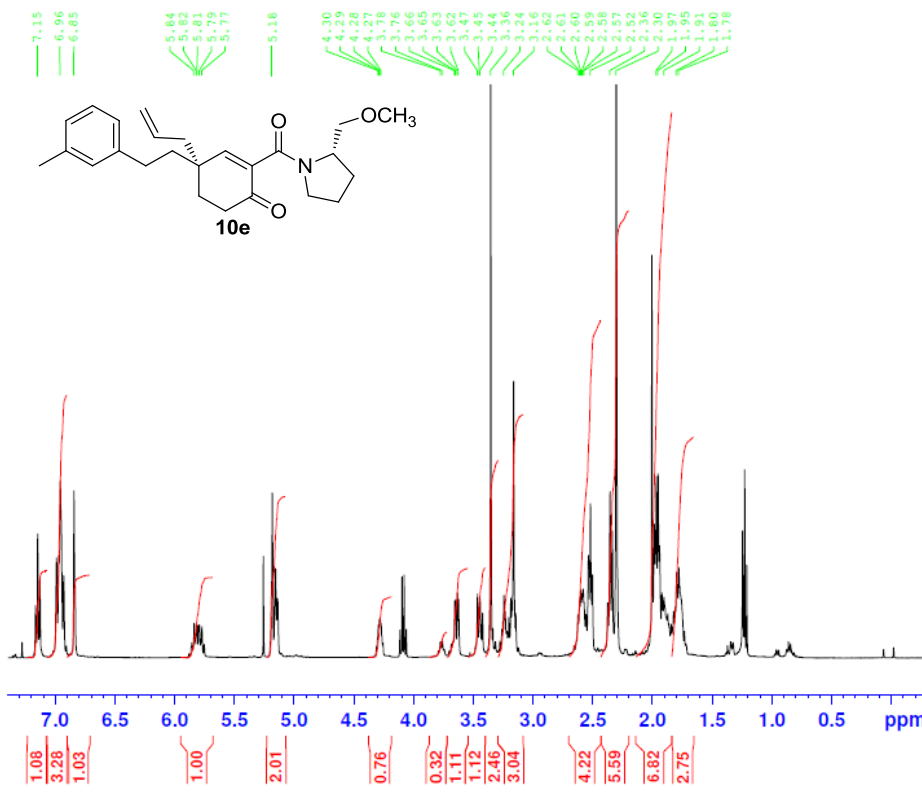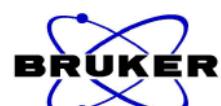

```

NAME      sjb_77_026fp
EXPNO     1
PROCNO    1
Date_     20130108
Time      15.11
INSTRUM   spect
PROBHD    5 mm PABBO BB-
PULPROG   zg30
TD         65536
SOLVENT   CDC13
NS         16
DS         2
SWH        8223.685 Hz
FIDRES     0.125483 Hz
AQ         3.9846387 sec
RG         25.4
DW         60.800 usec
DE         6.50 usec
TE         299.4 K
D1         1.00000000 sec
TDO        1

----- CHANNEL f1 -----
NUC1       1H
P1         12.50 usec
PL1        -2.00 dB
PL1W       12.14226913 W
SF01       400.1524711 MHz
SI         32768
SF         400.1500000 MHz
WDW        EM
SSB        0
LB         0.30 Hz
GB         0
PC         1.00
  
```

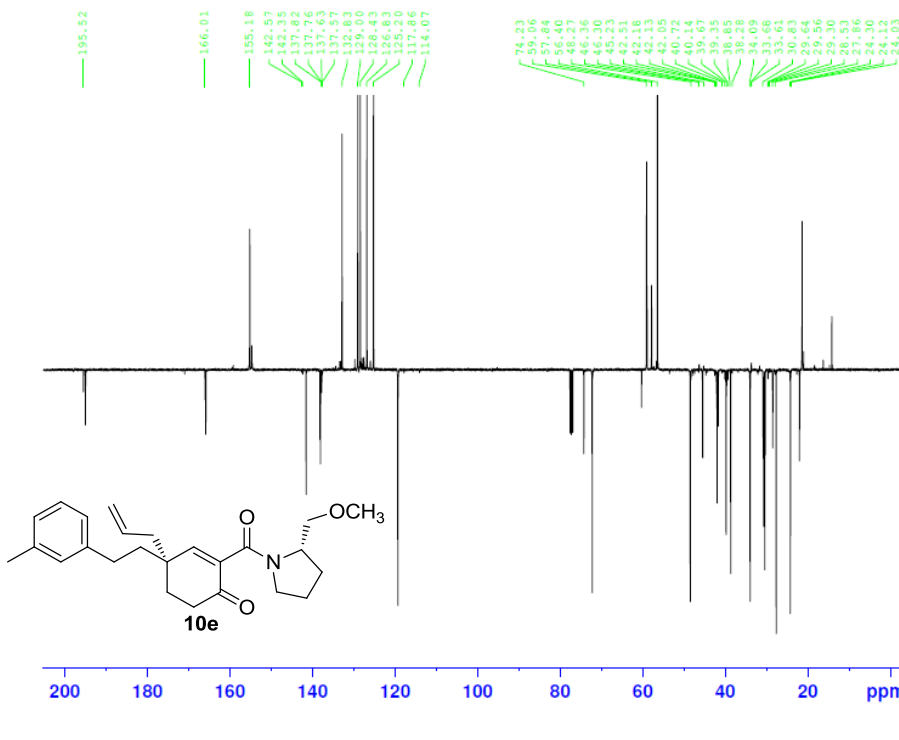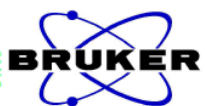

```

NAME      sjb_77_026fp 13CAPT
EXPNO     1
PROCNO    1
Date_     20130108
Time      16.42
INSTRUM   spect
PROBHD    5 mm PABBO BB-
PULPROG   jmod
TD         65536
SOLVENT   CDC13
NS         1024
DS         4
SWH        21008.404 Hz
FIDRES     0.320563 Hz
AQ         1.5598068 sec
RG         203
DW         23.800 usec
DE         6.50 usec
TE         301.6 K
CNST2     145.0000000
CNST11    1.0000000
D1         2.00000000 sec
D20        0.00689655 sec
TDO        1

----- CHANNEL f1 -----
NUC1       13C
P1         8.00 usec
P2         16.00 usec
PL1        -2.00 dB
PL1W       56.13311005 W
SF01       100.6279360 MHz

----- CHANNEL f2 -----
CPDPRG2   waltz16
NUC2       1H
PCPD2     80.00 usec
PL2        -2.00 dB
PL12       14.00 dB
PL2W       12.14226913 W
PL12W     0.30500001 W
SF02       400.1514213 MHz
SI         32768
SF         100.6177980 MHz
WDW        EM
SSB        0
LB         1.00 Hz
GB         0
PC         1.40
  
```



Area Percent Report

Data Path : C:\msdchem\1\DATA\  
Data File : sjb\_77\_026fp.D  
Acq On : 8 Jan 2013 15:19  
Operator : sjb  
Sample : sjb\_77\_026fp  
Misc :  
ALS Vial : 5 Sample Multiplier: 1

Integration Parameters: autoint1.e  
Integrator: ChemStation

Method : C:\msdchem\1\METHODS\ckr3.m  
Title :

Signal : TIC: sjb\_77\_026fp.D\data.ms

| peak # | R.T. min | first scan | max scan | last scan | PK TY | peak height | corr. area | corr. % max. | % of total |
|--------|----------|------------|----------|-----------|-------|-------------|------------|--------------|------------|
| 1      | 15.665   | 1783       | 1937     | 1969      | VV 4  | 2054550     | 248861067  | 100.00%      | 93.344%    |
| 2      | 15.855   | 1969       | 1970     | 1981      | VV 8  | 91613       | 3553786    | 1.43%        | 1.333%     |
| 3      | 15.997   | 1981       | 1995     | 2017      | VV 6  | 301860      | 13684775   | 5.50%        | 5.133%     |
| 4      | 16.137   | 2017       | 2020     | 2030      | VV 4  | 19764       | 505636     | 0.20%        | 0.190%     |

Sum of corrected areas: 266605263

ckr3.m Wed Mar 19 12:22:46 2014

Abundance

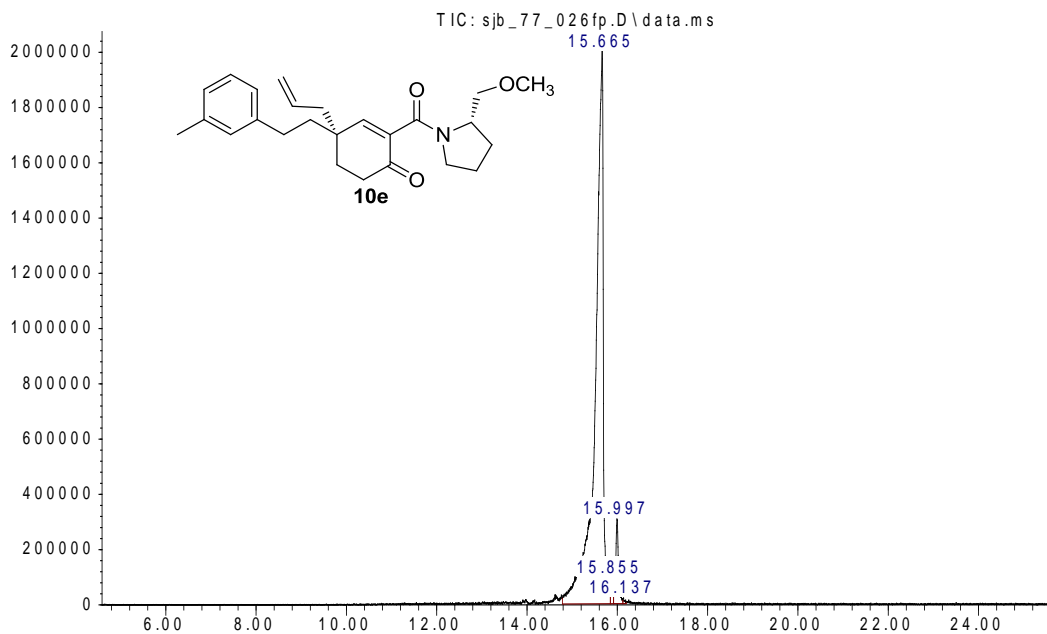

Time-->

Abundance

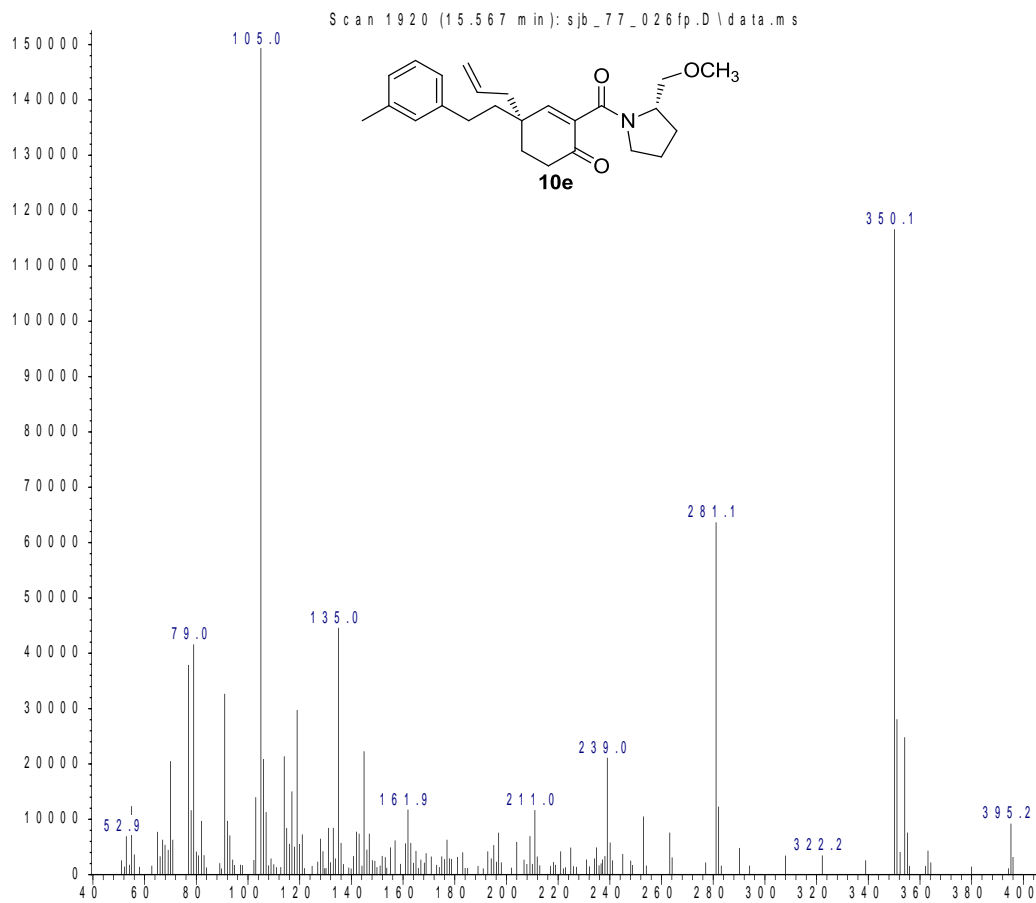

m/z-->

Abundance

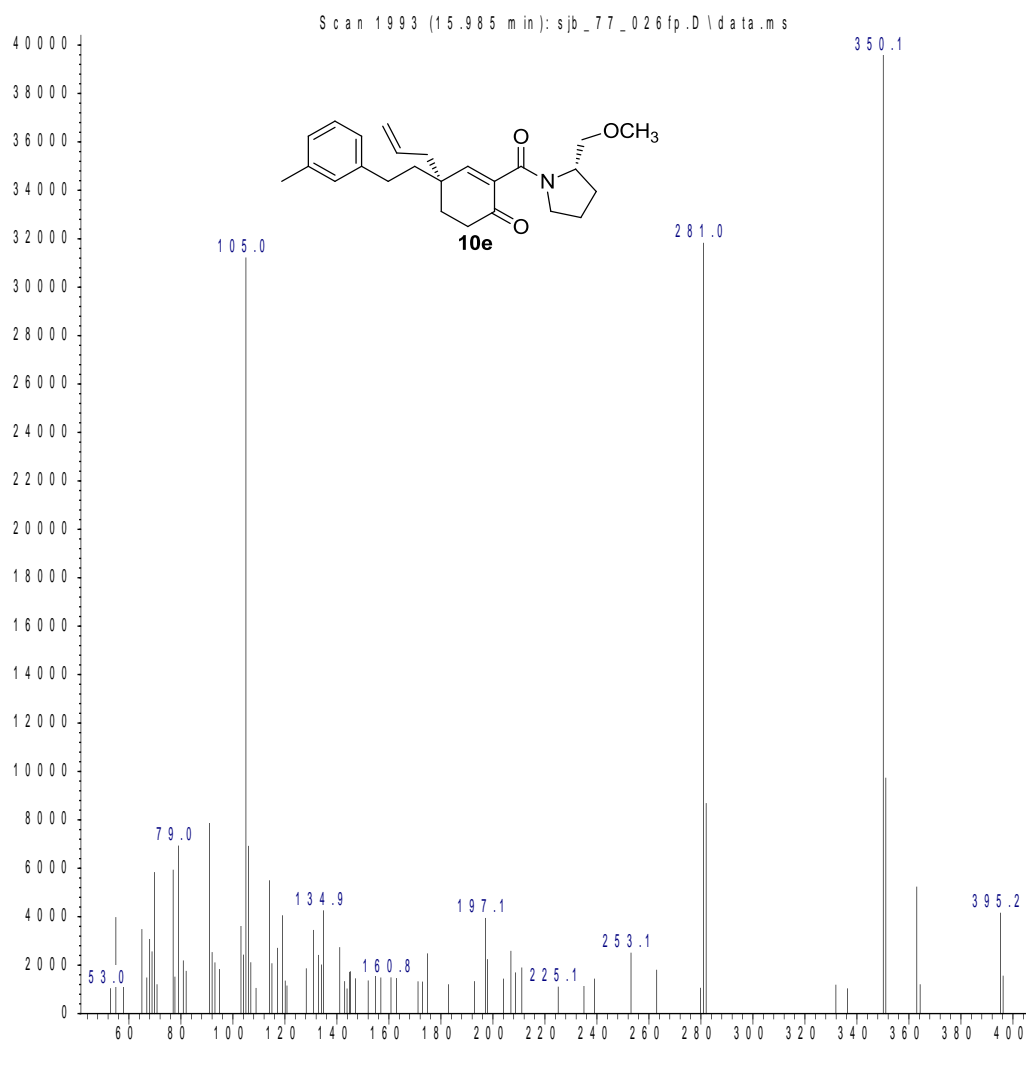

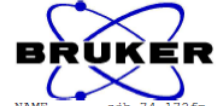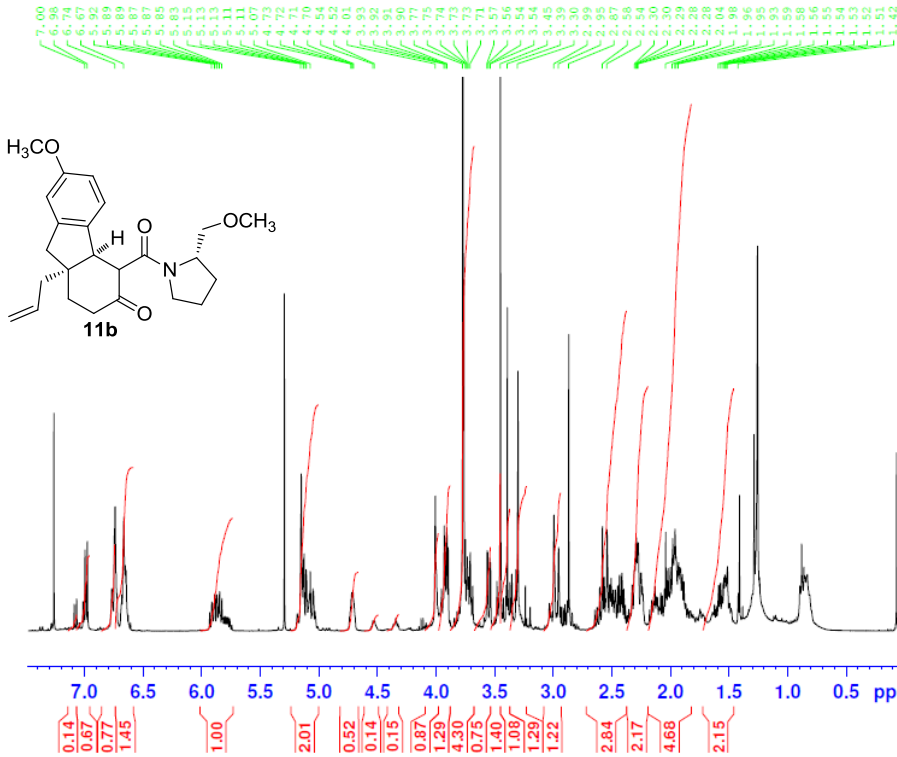

```
NAME      sjb_74_172fp
EXPNO     1
PROCNO    1
Date_     20121011
Time      15.16
INSTRUM   spect
PROBHD    5 mm DUL 13C-1
PULPROG   zg30
TD        65536
SOLVENT   CDC13
NS        16
DS        2
SWH       8223.685 Hz
FIDRES    0.125483 Hz
AQ        3.9846387 sec
RG        114
DW        60.800 usec
DE        6.50 usec
TE        301.0 K
D1        1.00000000 sec
TD0       1

===== CHANNEL f1 =====
NUC1      1H
P1        9.80 usec
PL1       -4.00 dB
PL1W     19.24419975 W
SFO1     400.1524711 MHz
SI        32768
SF        400.1500077 MHz
WDW       EM
SSB       0
LB        0.30 Hz
GB        0
PC        1.00
```

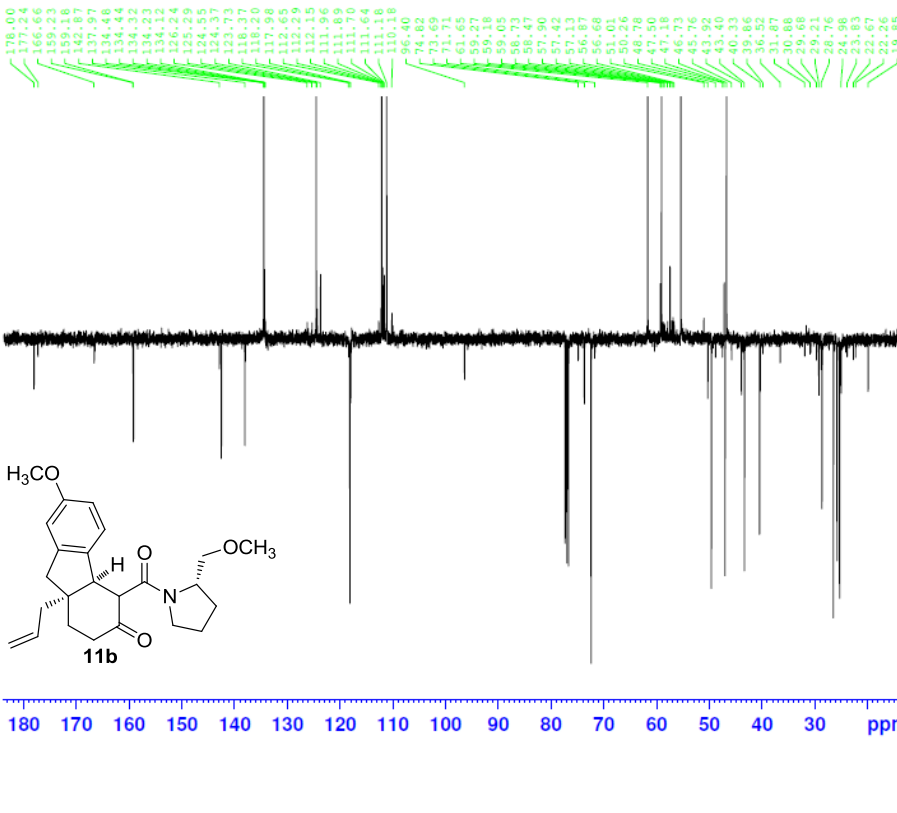

```
Current Data Parameters
NAME      sjb_74_185 APT
EXPNO     1
PROCNO    1

F2 - Acquisition Parameters
Date_     20121024
Time      9.09
INSTRUM   spect
PROBHD    5 mm DUL 13C-1
PULPROG   jmod
TD        65536
SOLVENT   CDC13
NS        1024
DS        4
SWH       19230.770 Hz
FIDRES    0.293438 Hz
AQ        1.7039360 sec
RG        203
DW        26.000 usec
DE        6.50 usec
TE        301.2 K
CNS12    145.0000000
CNS11    1.0000000
D1        2.00000000 sec
D20      0.00689655 sec
TD0       1

===== CHANNEL f1 =====
NUC1      13C
P1        9.00 usec
P2        18.00 usec
PL1       0 dB
PL1W     35.41759872 W
SFO1     100.6269591 MHz

===== CHANNEL f2 =====
CPDPRG[2] waltz16
NUC2      1H
PCPD2    80.00 usec
PL2       -3.80 dB
PL12     13.80 dB
PL2W     18.37806702 W
PL12W    0.31937420 W
SFO2     400.1514663 MHz

F2 - Processing parameters
SI        32768
SF        100.6177980 MHz
WDW       EM
SSB       0
LB        1.00 Hz
GB        0
PC        1.40
```

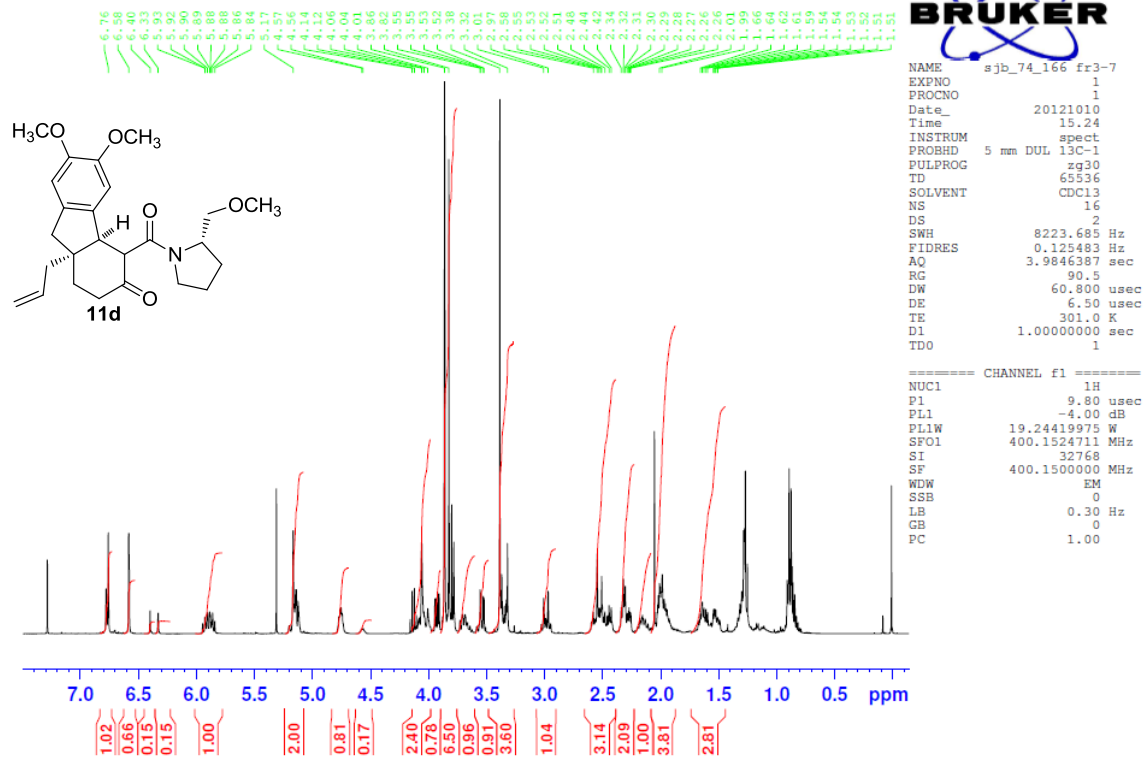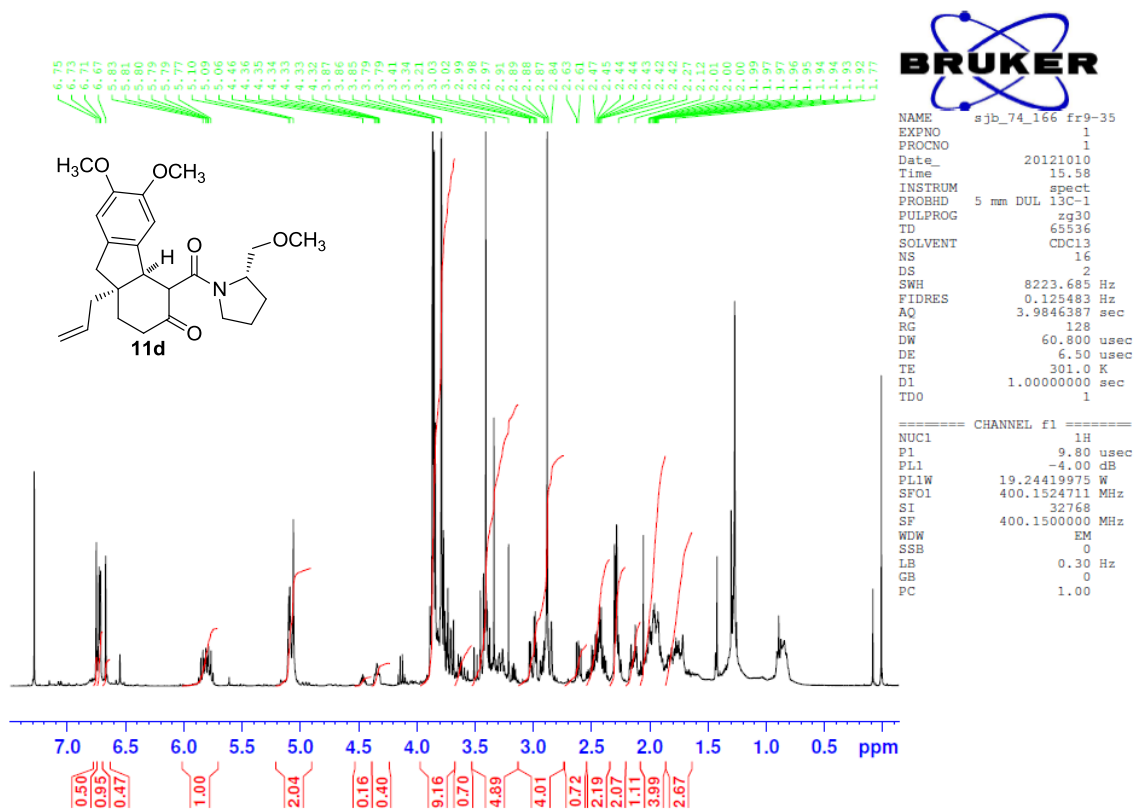



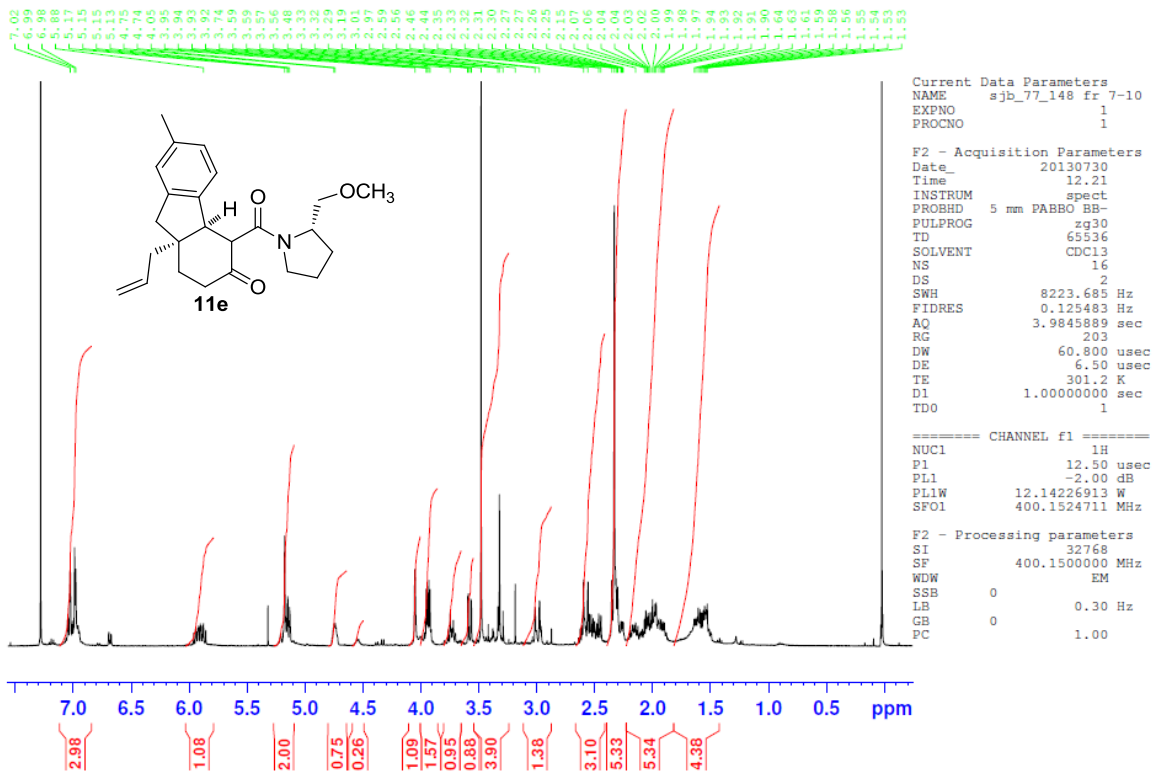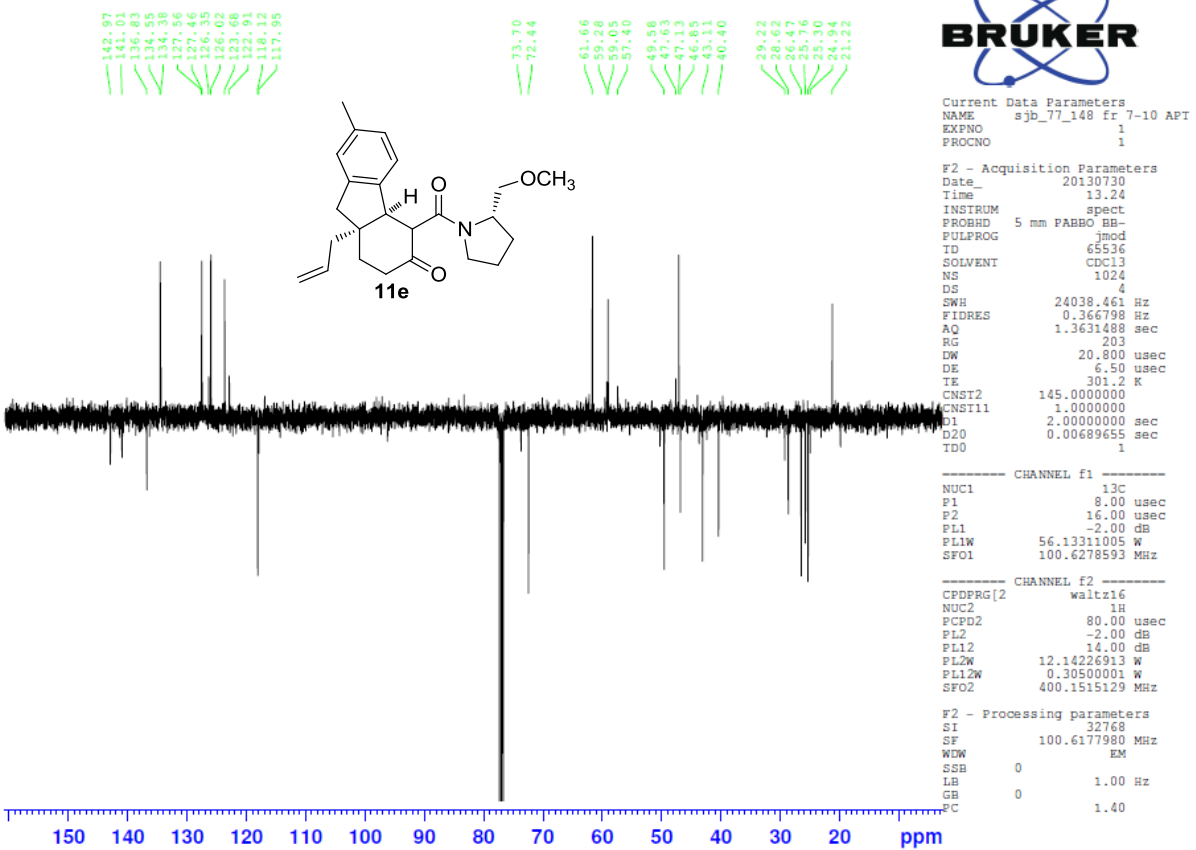

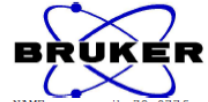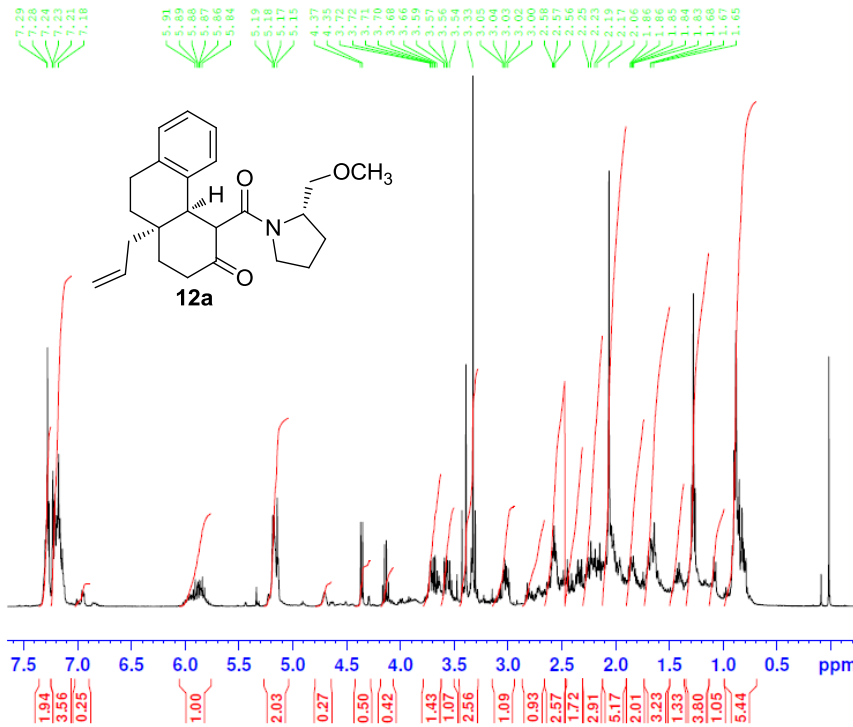

NAME sjb\_72\_077fp  
EXPNO 1  
PROCNO 1  
Date\_ 20120118  
Time 16.54  
INSTRUM spect  
PROBHD 5 mm PABBO BB-  
PULPROG zg30  
TD 65536  
SOLVENT CDCl3  
NS 16  
DS 2  
SWH 8223.685 Hz  
FIDRES 0.125483 Hz  
AQ 3.9846387 sec  
RG 101  
DW 60.800 usec  
DE 6.50 usec  
TE 297.1 K  
D1 1.00000000 sec  
TDO 1

===== CHANNEL f1 =====  
NUC1 1H  
P1 12.50 usec  
PL1 -2.00 dB  
PL1W 12.14226913 W  
SFO1 400.1524711 MHz  
SI 32768  
SF 400.1500000 MHz  
WDW EM  
SSB 0  
LB 0.30 Hz  
GB 0  
PC 1.00

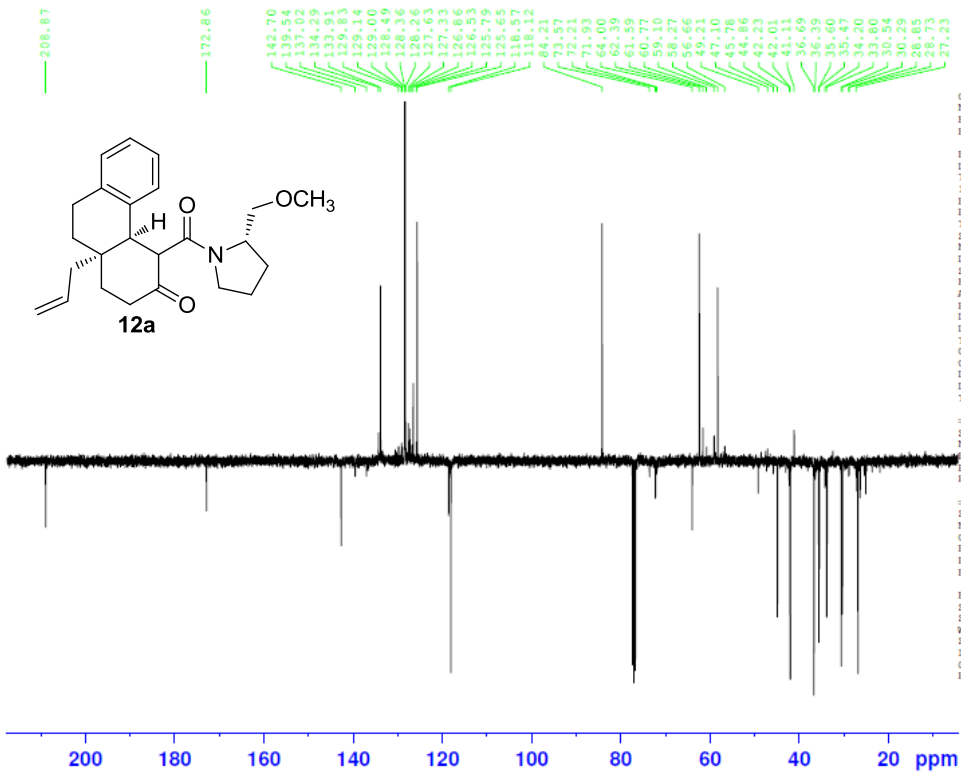

Current Data Parameters  
NAME sjb\_210 FC 666 phenyl APT 2  
EXPNO 1  
PROCNO 1

F2 - Acquisition Parameters  
Date\_ 20140325  
Time 19.35  
INSTRUM spect  
PROBHD 5 mm PABBO BB-  
PULPROG jmod  
TD 65536  
SOLVENT CDCl3  
NS 512  
DS 4  
SWH 24038.461 Hz  
FIDRES 0.366798 Hz  
AQ 1.3631488 sec  
RG 203  
DW 20.800 usec  
DE 6.50 usec  
TE 301.2 K  
CNST2 145.0000000  
CNST11 1.0000000  
D1 2.0000000 sec  
D20 0.00689655 sec  
TDO 1

===== CHANNEL f1 =====  
SFO1 100.6278593 MHz  
NUC1 13C  
P1 8.00 usec  
PL1 16.00 usec  
PLW1 56.13299942 W

===== CHANNEL f2 =====  
SFO2 400.1516006 MHz  
NUC2 1H  
CPOFC[2] wait16  
PCFO2 90.00 usec  
PLW2 12.14200020 W  
PLW12 0.24369000 W

F2 - Processing parameters  
SI 32768  
SF 100.6177980 MHz  
WDW EM  
SSB 0  
LB 1.00 Hz  
GB 0  
PC 1.40



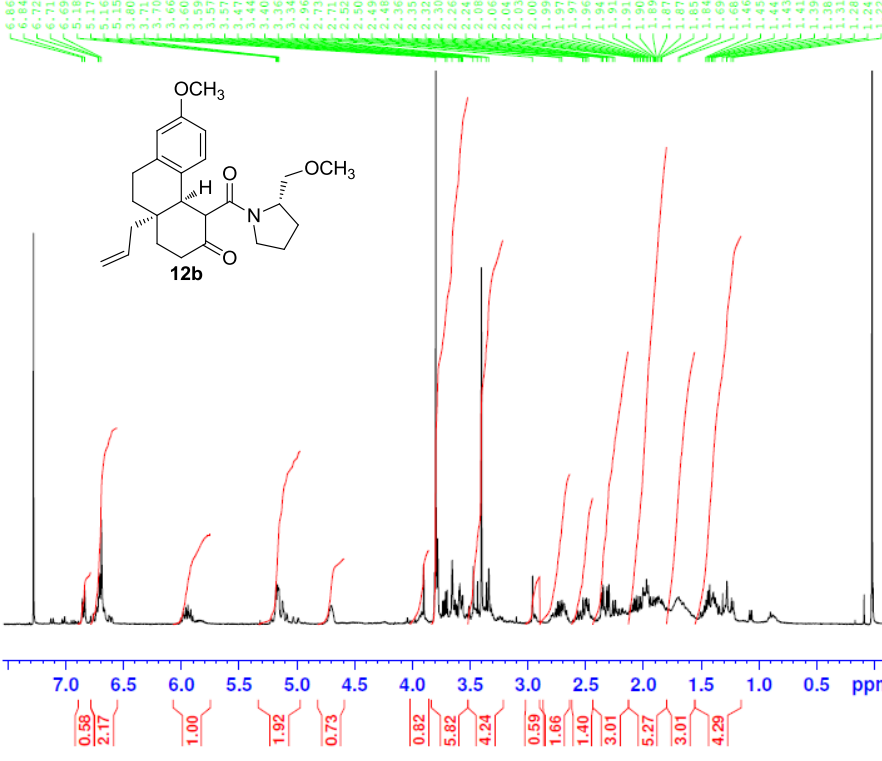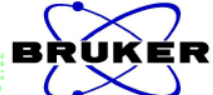

```

NAME      njb_77_090 fr3-6 fp take2
EXPNO     1
PROCNO    1
Date_     20130802
Time      14.17
INSTRUM   spect
PROBHD    5 mm PABBO BB-
PULPROG   zg30
TD         65536
FIDRES    0.125483 Hz
AQ         3.9846387 sec
RG         203
DS         2
SWH       8223.685 Hz
FIDRES    0.125483 Hz
AQ         3.9846387 sec
RG         203
DW         60.800 usec
DE         6.50 usec
TE         301.2 K
D1         1.00000000 sec
TDO       1
===== CHANNEL f1 =====
NUC1      1H
P1         12.50 usec
PL1       -2.00 dB
PL1W      12.14226913 W
SFO1      400.1524711 MHz
SI         32768
SF         400.1500000 MHz
WDW       EM
SSB       0
LB        0.30 Hz
GB         0
PC         1.00
  
```

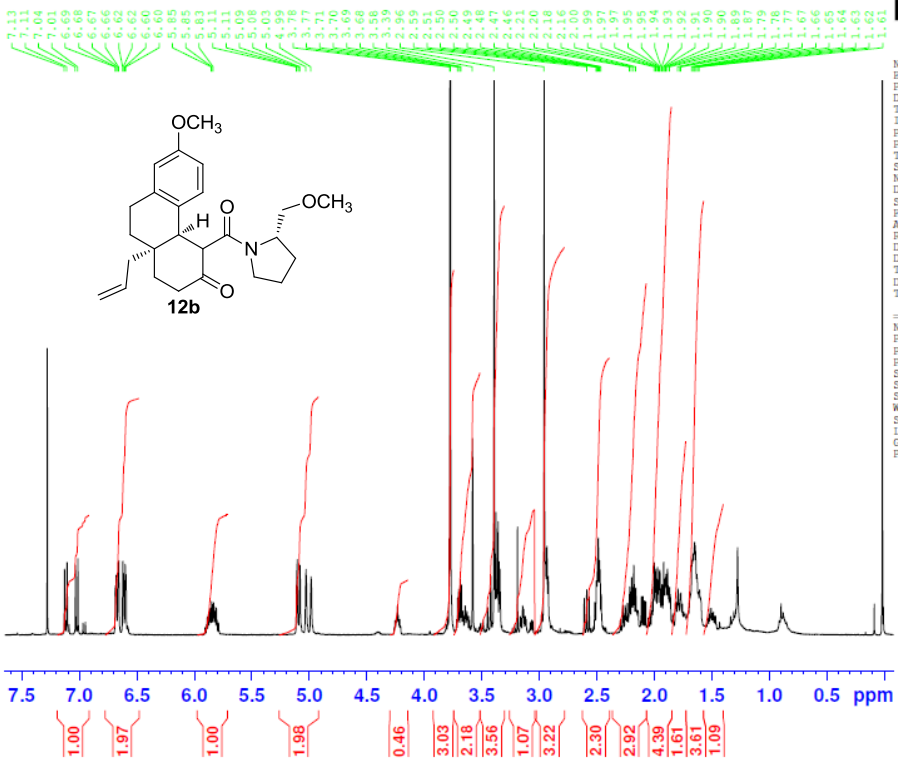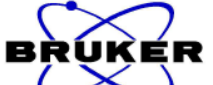

```

NAME      njb_77_090 fr10-33 take 2
EXPNO     1
PROCNO    1
Date_     20130805
Time      11.21
INSTRUM   spect
PROBHD    5 mm PABBO BB-
PULPROG   zg30
TD         65536
FIDRES    0.125483 Hz
AQ         3.9846387 sec
RG         203
DS         2
SWH       8223.685 Hz
FIDRES    0.125483 Hz
AQ         3.9846387 sec
RG         203
DW         60.800 usec
DE         6.50 usec
TE         301.2 K
D1         1.00000000 sec
TDO       1
===== CHANNEL f1 =====
NUC1      1H
P1         12.50 usec
PL1       -2.00 dB
PL1W      12.14226913 W
SFO1      400.1524711 MHz
SI         32768
SF         400.1500000 MHz
WDW       EM
SSB       0
LB        0.30 Hz
GB         0
PC         1.00
  
```

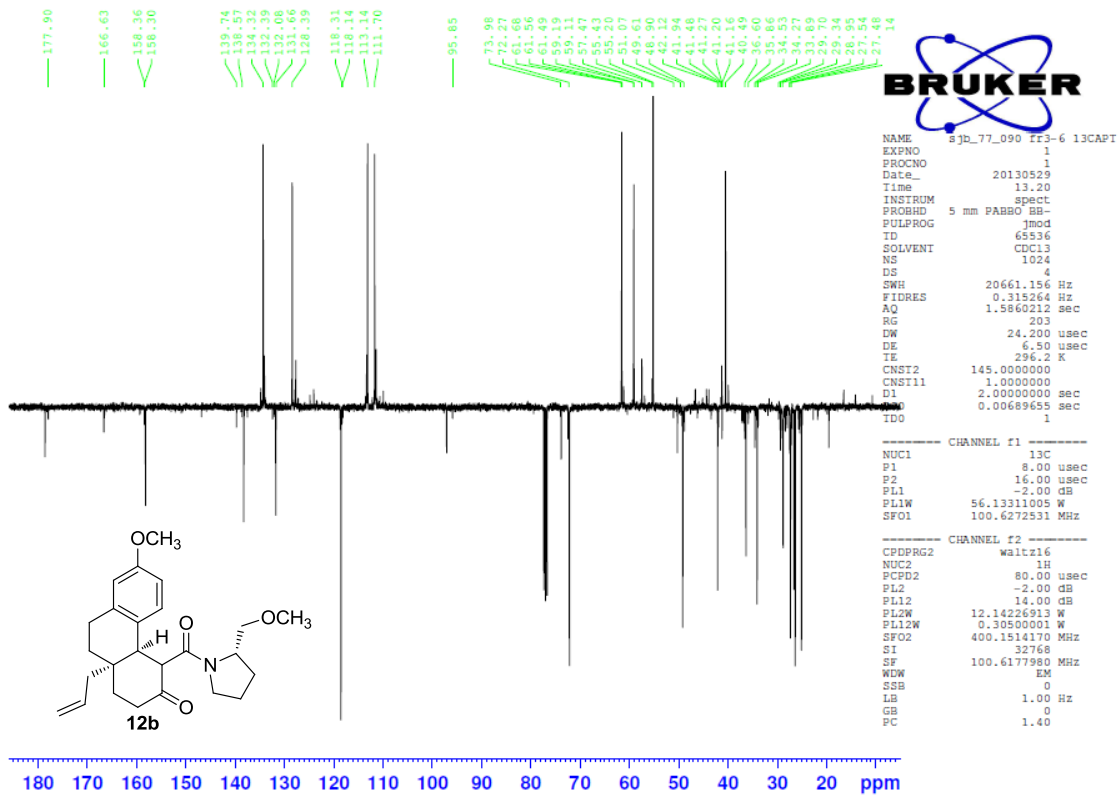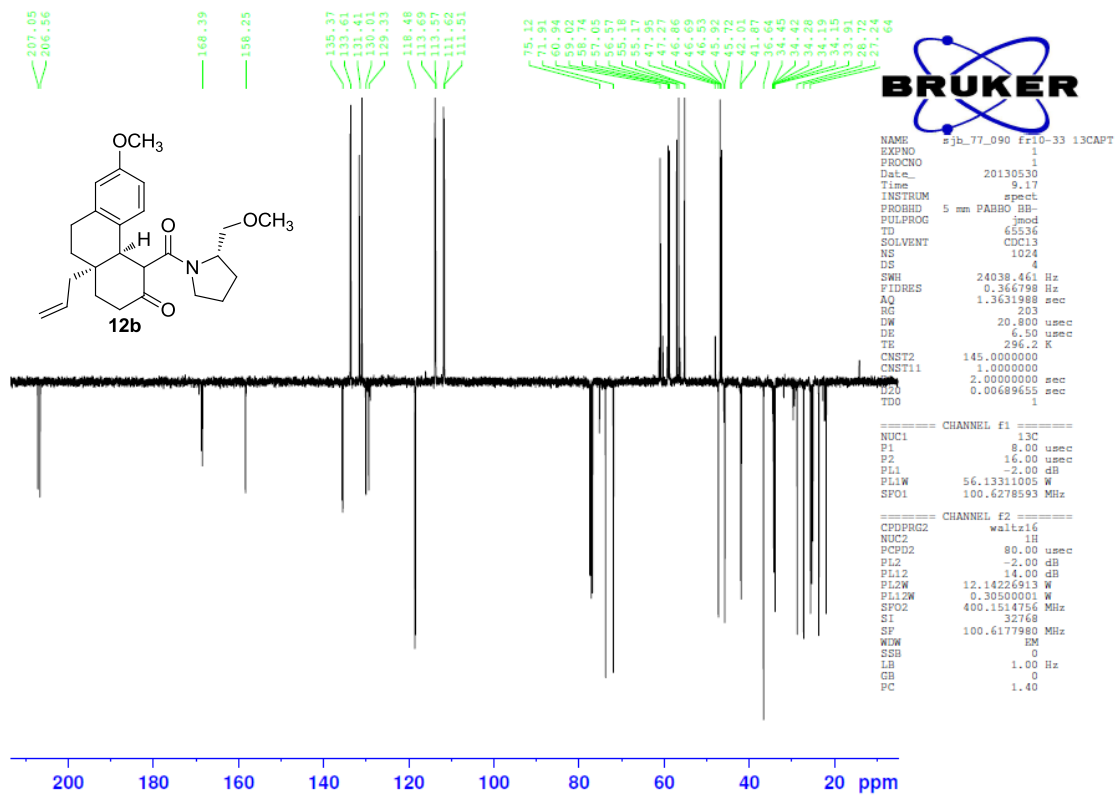

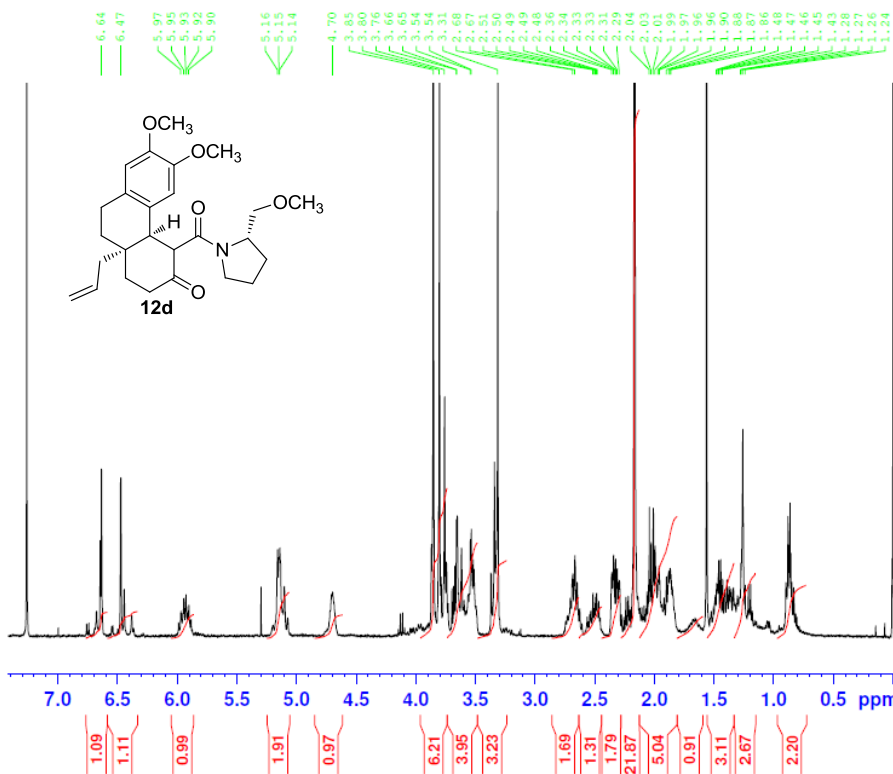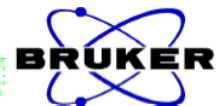

```

NAME      sjb_72_147 fr5-10
EXPNO     1
PROCNO    1
Date_     20120302
Time      12.08
INSTRUM   spect
PROBHD    5 mm PABBO BB-
PULPROG   zg30
TD         65536
SOLVENT   CDCl3
NS         16
DS         2
SWH        8223.685 Hz
FIDRES     0.125483 Hz
AQ         3.9846387 sec
RG         203
DW         60.800 usec
DE         6.50 usec
TE         301.2 K
D1         1.00000000 sec
TDO        1
  
```

```

===== CHANNEL f1 =====
NUC1      1H
P1        12.50 usec
PL1       -2.00 dB
PL1W      12.14226913 W
SF01      400.1524711 MHz
SI        32768
SF        400.1500075 MHz
WDW       EM
SSB       0
LB        0.30 Hz
GB        0
PC        1.00
  
```

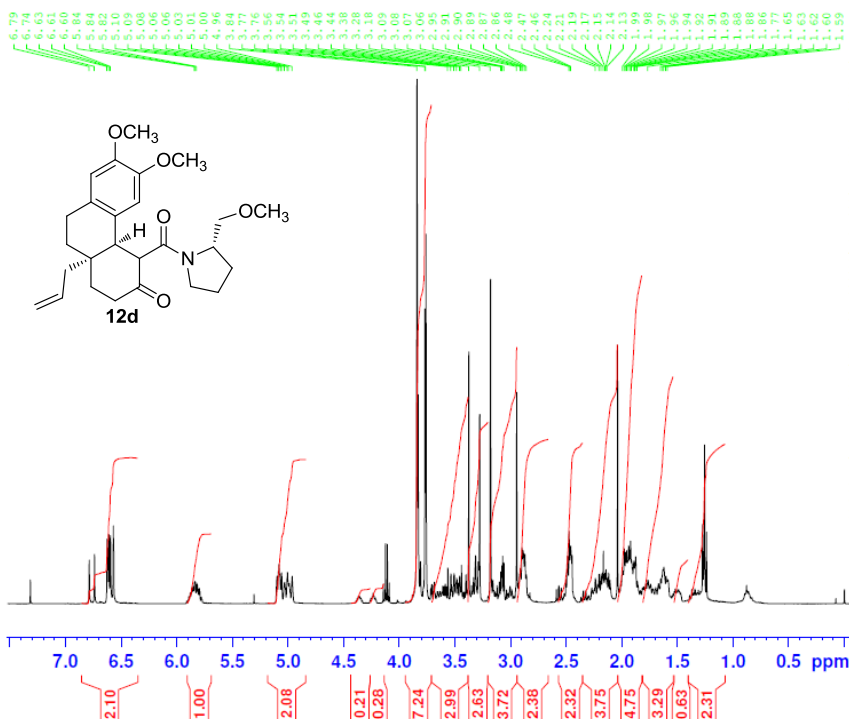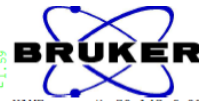

```

NAME      sjb_72_147 fr22-40
EXPNO     1
PROCNO    1
Date_     20120302
Time      12.14
INSTRUM   spect
PROBHD    5 mm PABBO BB-
PULPROG   zg30
TD         65536
SOLVENT   CDCl3
NS         16
DS         2
SWH        8223.685 Hz
FIDRES     0.125483 Hz
AQ         3.9846387 sec
RG         28.5
DW         60.800 usec
DE         6.50 usec
TE         301.2 K
D1         1.00000000 sec
TDO        1
  
```

```

===== CHANNEL f1 =====
NUC1      1H
P1        12.50 usec
PL1       -2.00 dB
PL1W      12.14226913 W
SF01      400.1524711 MHz
SI        32768
SF        400.1499850 MHz
WDW       EM
SSB       0
LB        0.30 Hz
GB        0
PC        1.00
  
```

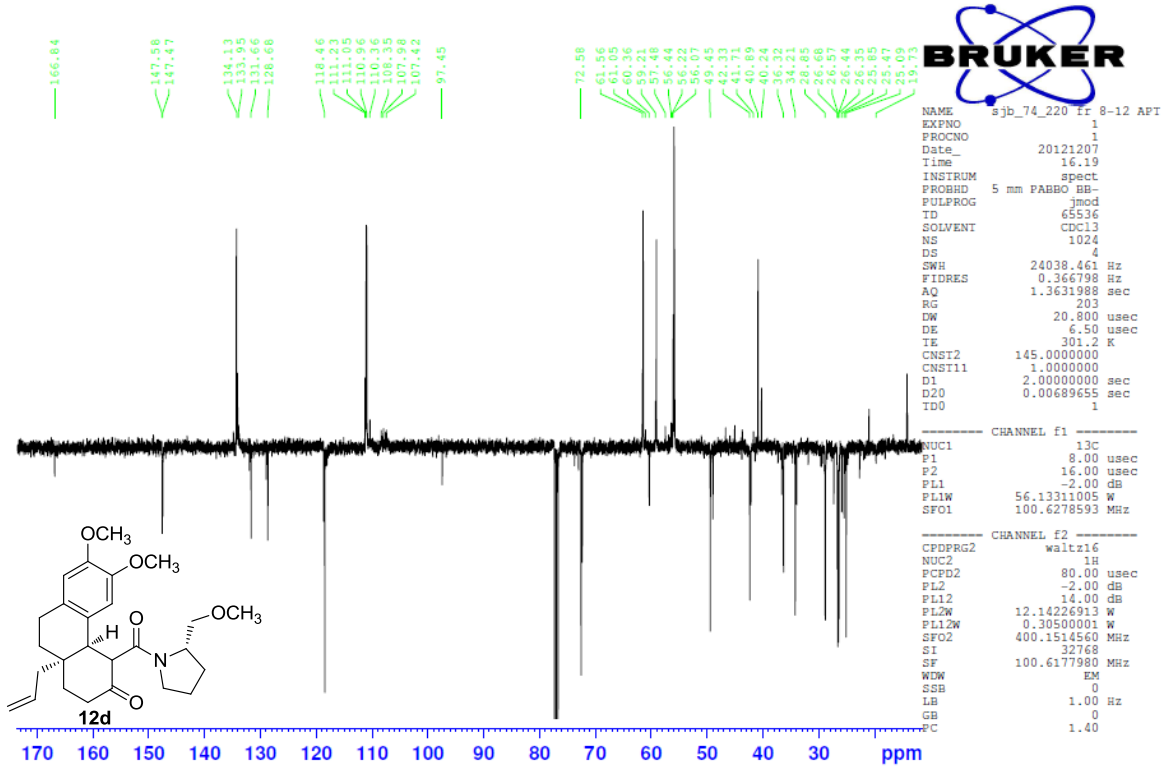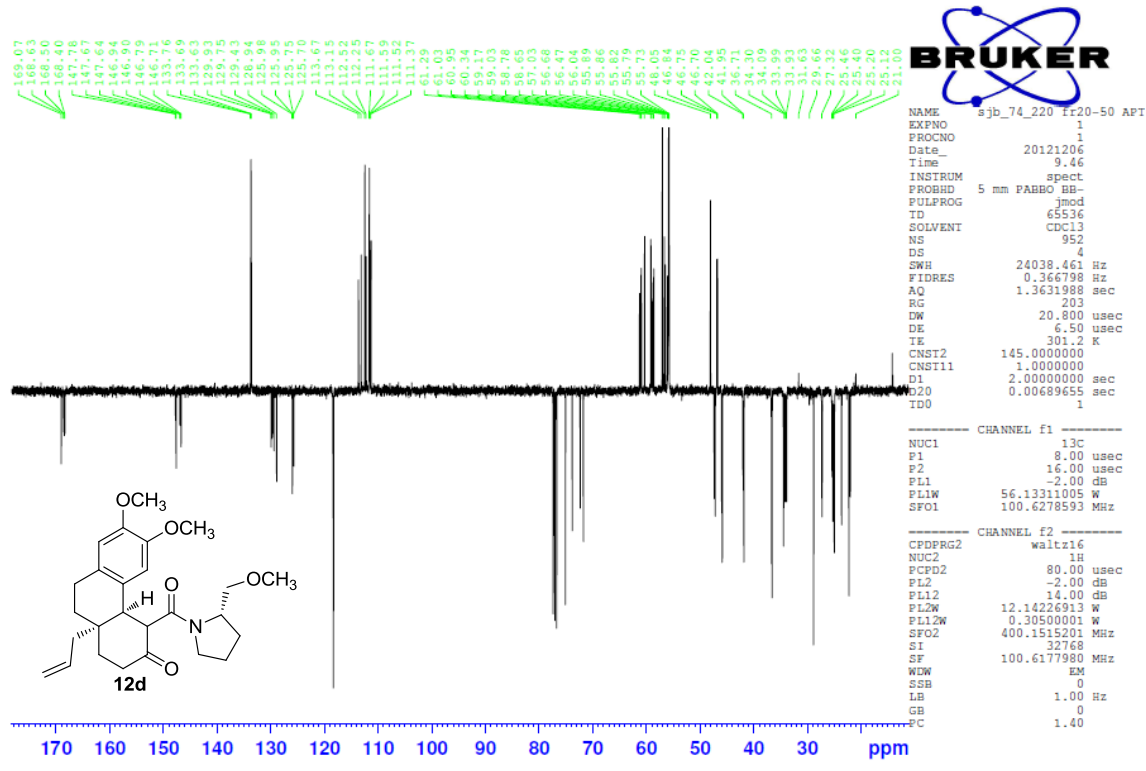

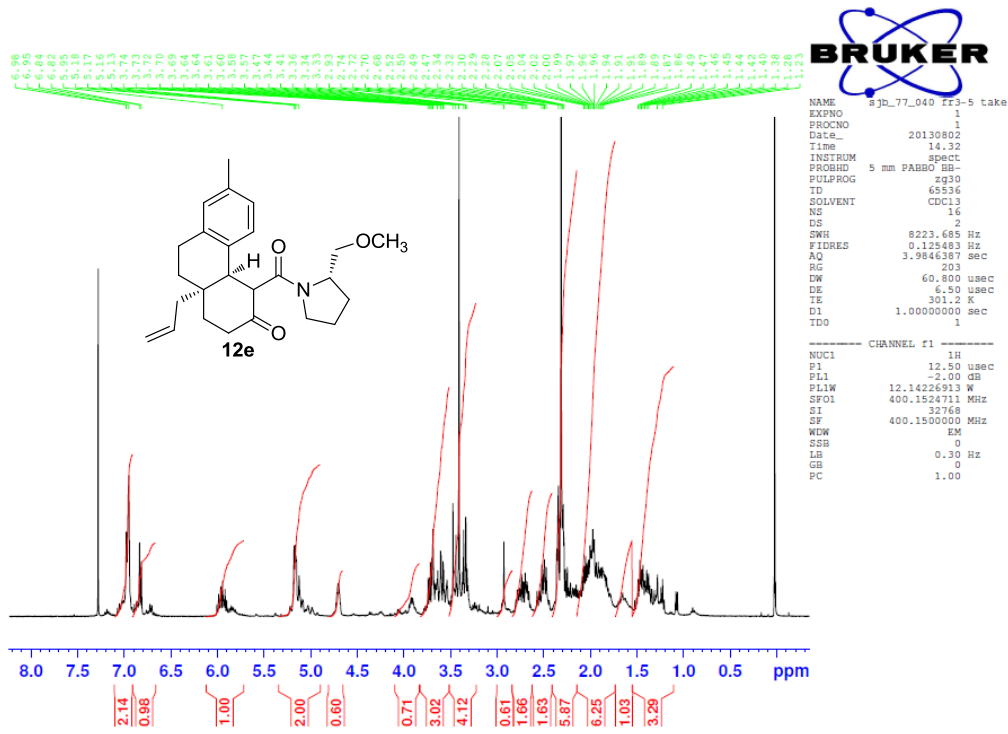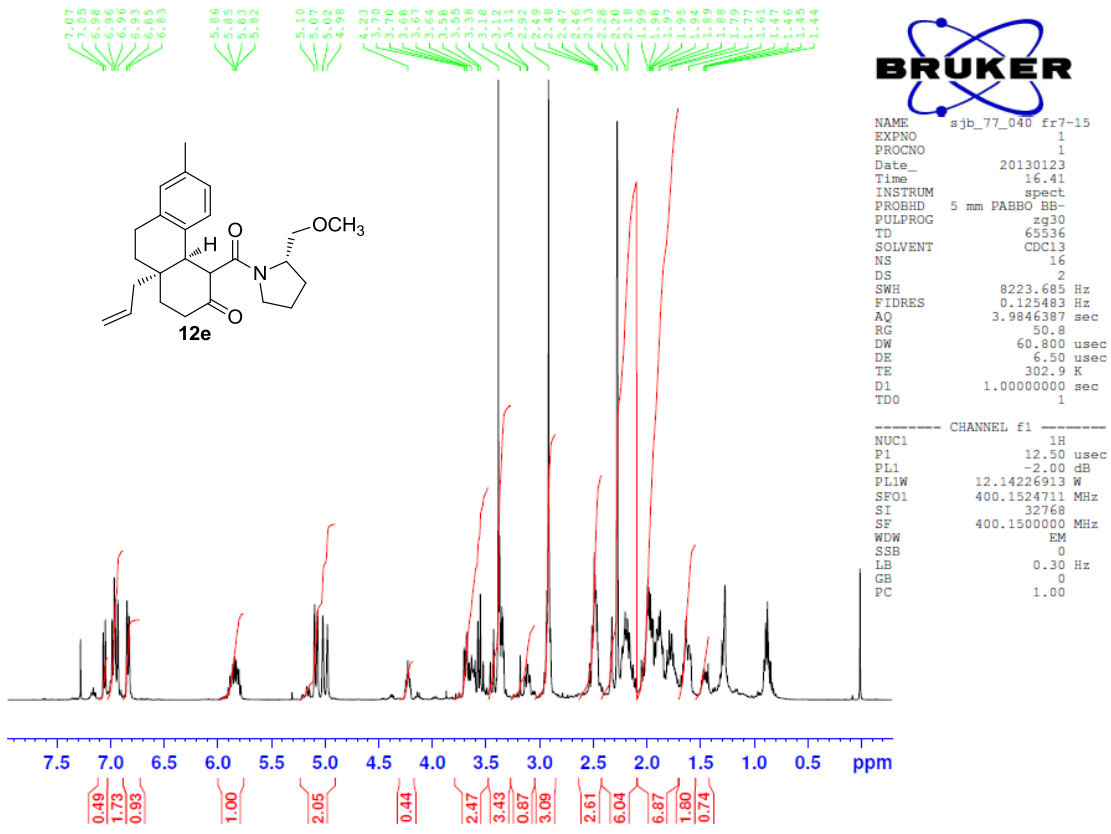

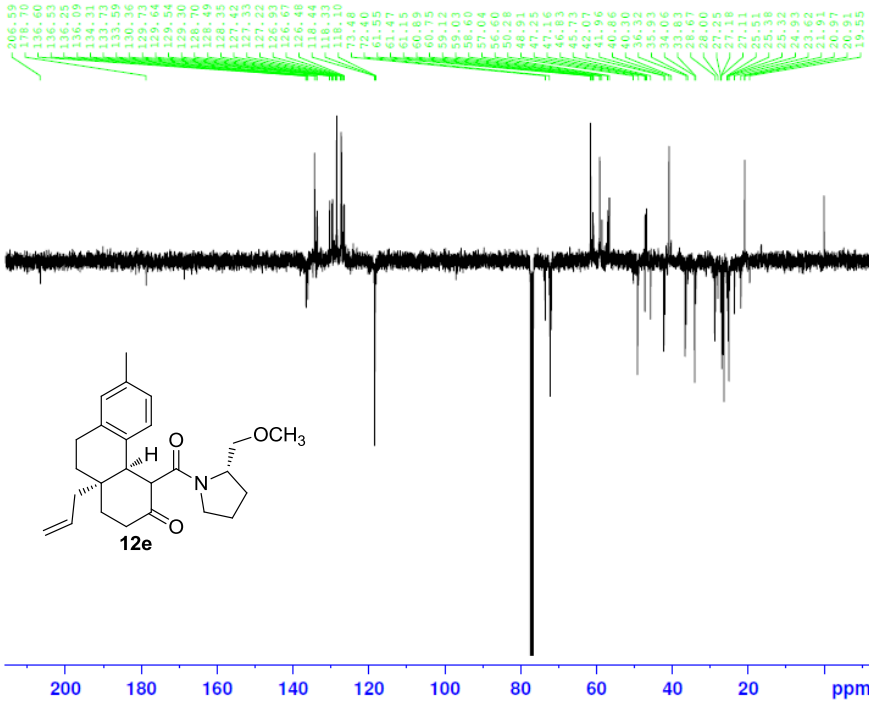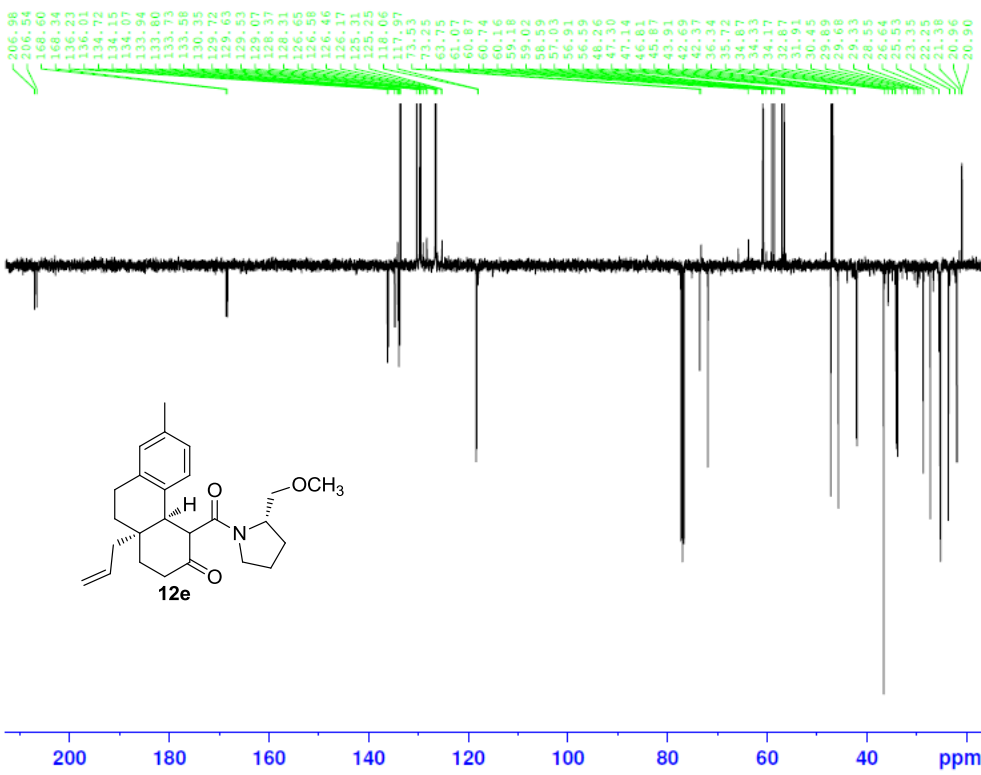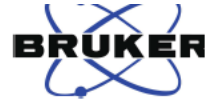

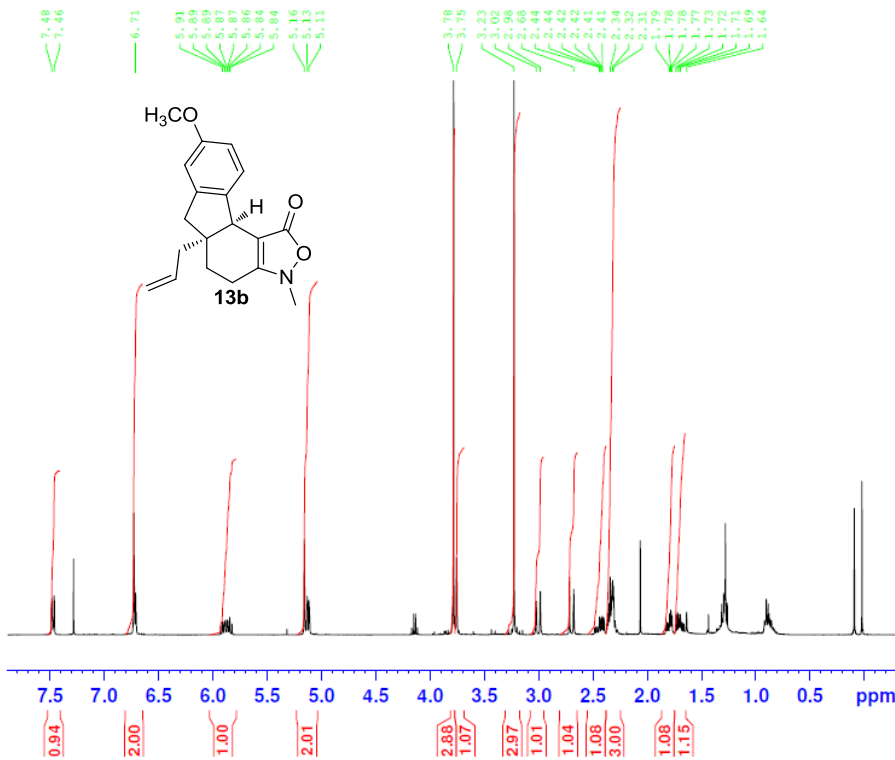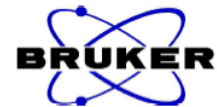

```

NAME      sjb_74_174fp
EXPNO     1
PROCNO    1
Date_     20121012
Time      15.37
INSTRUM   spect
PROBHD    5 mm DUL 13C-1
PULPROG   zg30
TD         65536
SOLVENT   CDCl3
NS         16
DS         2
SWH       8223.685 Hz
FIDRES    0.125483 Hz
AQ         3.9846387 sec
RG         181
DW         60.800 usec
DE         6.50 usec
TE         301.2 K
D1         1.00000000 sec
TDO        1
  
```

```

===== CHANNEL f1 =====
NUC1      1H
P1         9.80 usec
PL1       -4.00 dB
PL1W      19.24419975 W
SFO1      400.1524711 MHz
SI         32768
SF         400.1500000 MHz
WDW        EM
SSB        0
LB         0.30 Hz
GB         0
PC         1.00
  
```

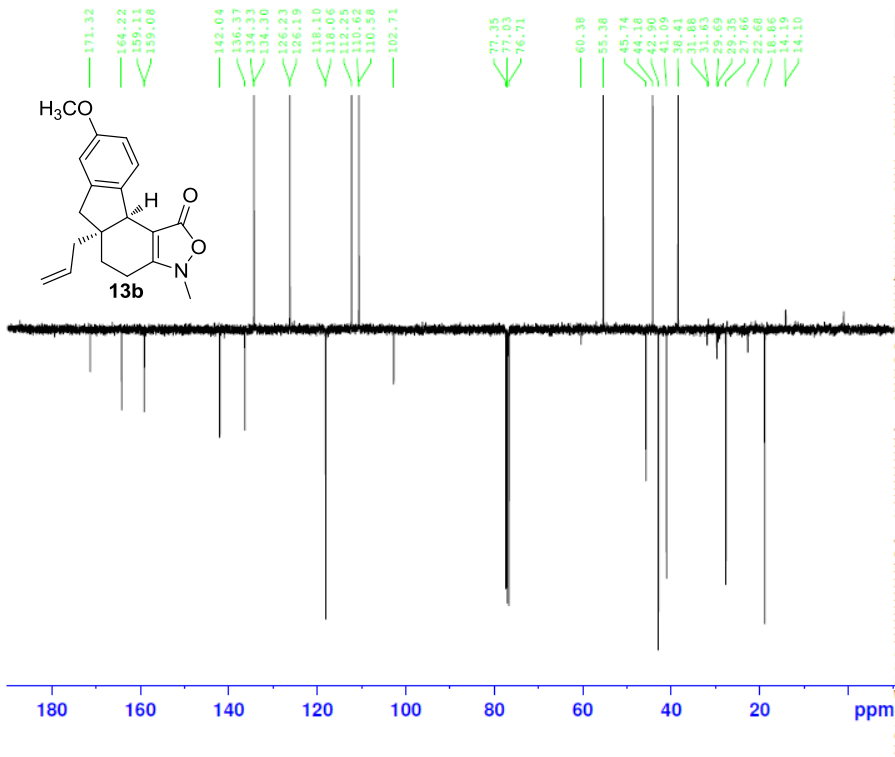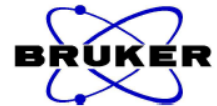

```

NAME      sjb_74_174fp 13CAPT
EXPNO     1
PROCNO    1
Date_     20121017
Time      9.19
INSTRUM   spect
PROBHD    5 mm DUL 13C-1
PULPROG   jmod
TD         65536
SOLVENT   CDCl3
NS         1024
DS         4
SWH       20161.291 Hz
FIDRES    0.307637 Hz
AQ         1.6253428 sec
RG         203
DW         24.800 usec
DE         6.50 usec
TE         301.2 K
CNST2     145.0000000
CNST11    1.0000000
D1         2.00000000 sec
D2         0.00689655 sec
TDO        1
  
```

```

===== CHANNEL f1 =====
NUC1      13C
P1         9.00 usec
P2         18.00 usec
PL1        0.00 dB
PL1W      35.41759872 W
SFO1      100.6268310 MHz

===== CHANNEL f2 =====
CPDPRG2   waltz16
NUC2      1H
PCPD2     80.00 usec
PL2       -3.80 dB
PL12     13.80 dB
PL2W     18.37806702 W
SFO2     400.1514525 MHz
SI         32768
SF        100.6177980 MHz
WDW        EM
SSB        0
LB         1.00 Hz
GB         0
PC         1.40
  
```

Area Percent Report

Data Path : C:\msdchem\1\DATA\  
Data File : sjb\_74\_174fp.D  
Acq On : 12 Oct 2012 15:09  
Operator : sjb  
Sample : sjb\_74\_174fp  
Misc :  
ALS Vial : 85 Sample Multiplier: 1

Integration Parameters: autoint1.e  
Integrator: ChemStation

Method : C:\msdchem\1\METHODS\JMB2.m  
Title :

Signal : TIC: sjb\_74\_174fp.D\data.ms

| peak # | R.T. min | first scan | max scan | last scan | PK TY | peak height | corr. area | corr. % max. | % of total |
|--------|----------|------------|----------|-----------|-------|-------------|------------|--------------|------------|
| 1      | 12.202   | 1316       | 1332     | 1344      | BV 5  | 600471      | 23119397   | 3.01%        | 2.924%     |
| 2      | 12.436   | 1344       | 1373     | 1479      | VB    | 17087691    | 767689587  | 100.00%      | 97.076%    |

Abundance

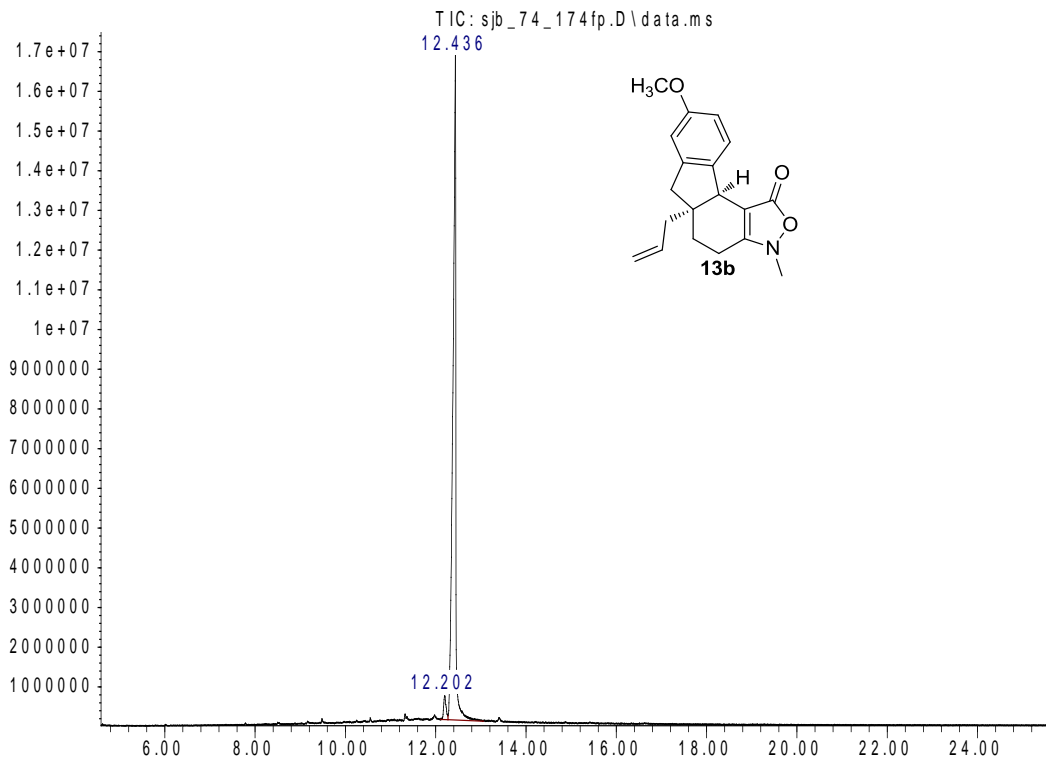



Abundance

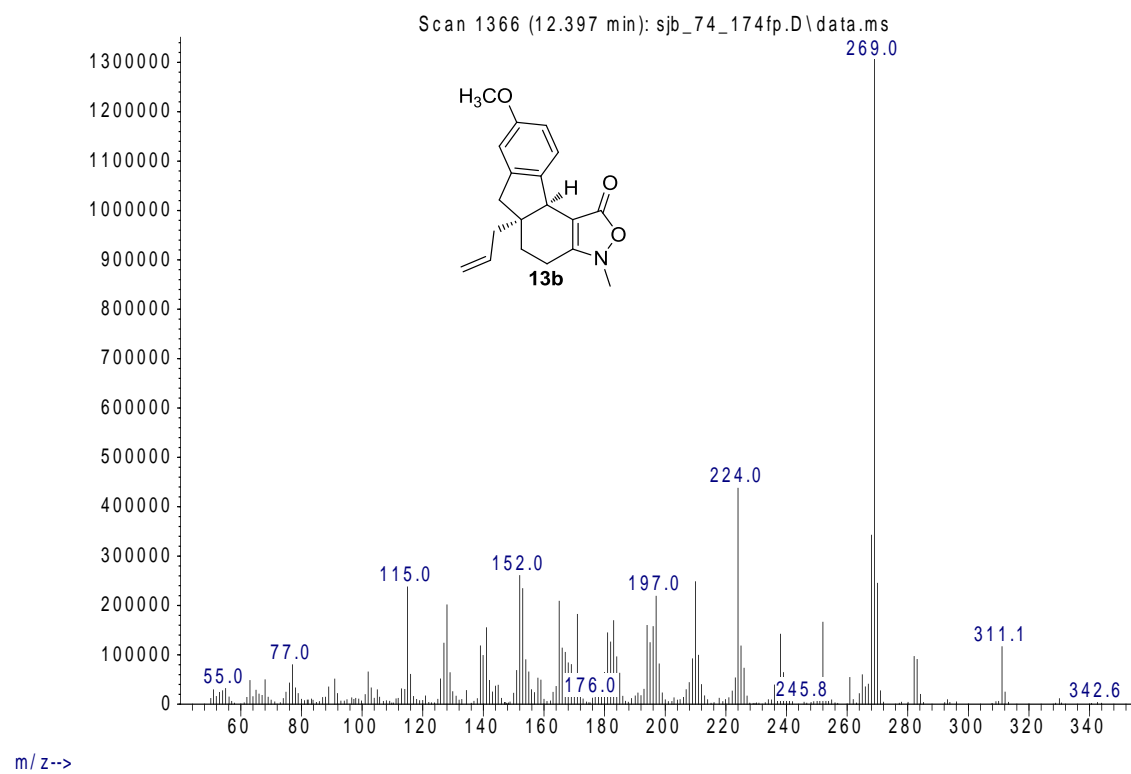

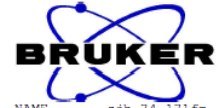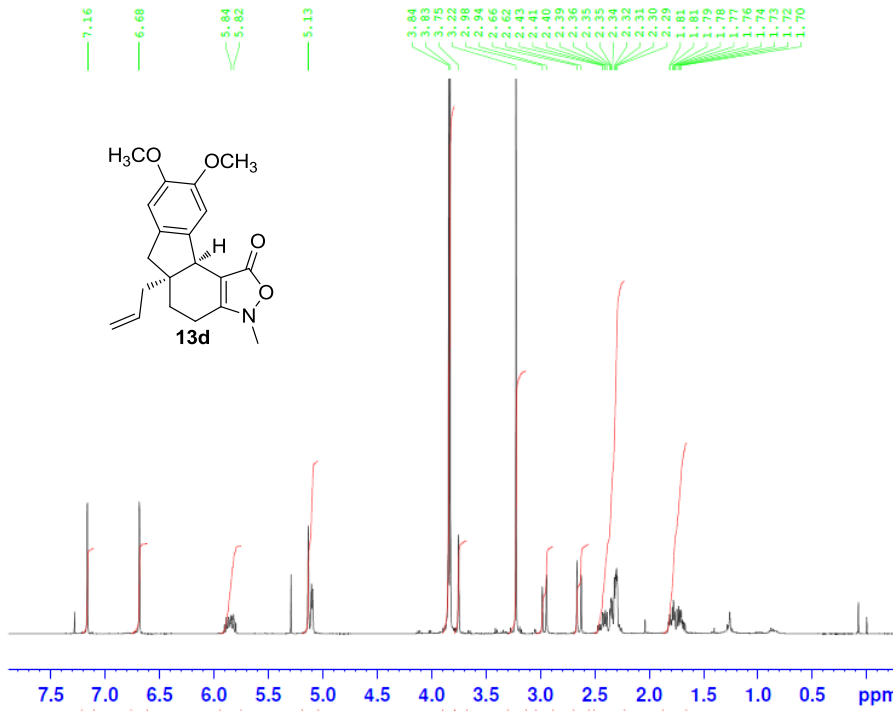

```

NAME      sjb_74_171fp
EXPNO     1
PROCNO    1
Date_     20121011
Time      15.10
INSTRUM   spect
PROBHD    5 mm DUL 13C-1
PULPROG   zg30
TD         65536
SOLVENT   CDC13
NS         16
DS         2
SWH       8223.685 Hz
FIDRES    0.125483 Hz
AQ        3.9846387 sec
RG         50.8
DW         60.800 usec
DE         6.50 usec
TE         301.1 K
D1         1.0000000 sec
D11        1
D12        1
D13        1
D14        1
D15        1
D16        1
D17        1
D18        1
D19        1
D20        1
TD0        1
  
```

```

===== CHANNEL f1 =====
NUC1      1H
P1        9.80 usec
PL1       -4.00 dB
PL1W      19.24419975 W
SF01      400.1524711 MHz
SI        32768
SF        400.1500000 MHz
WDW       EM
SSB       0
LB        0.30 Hz
GB        0
PC        1.00
  
```

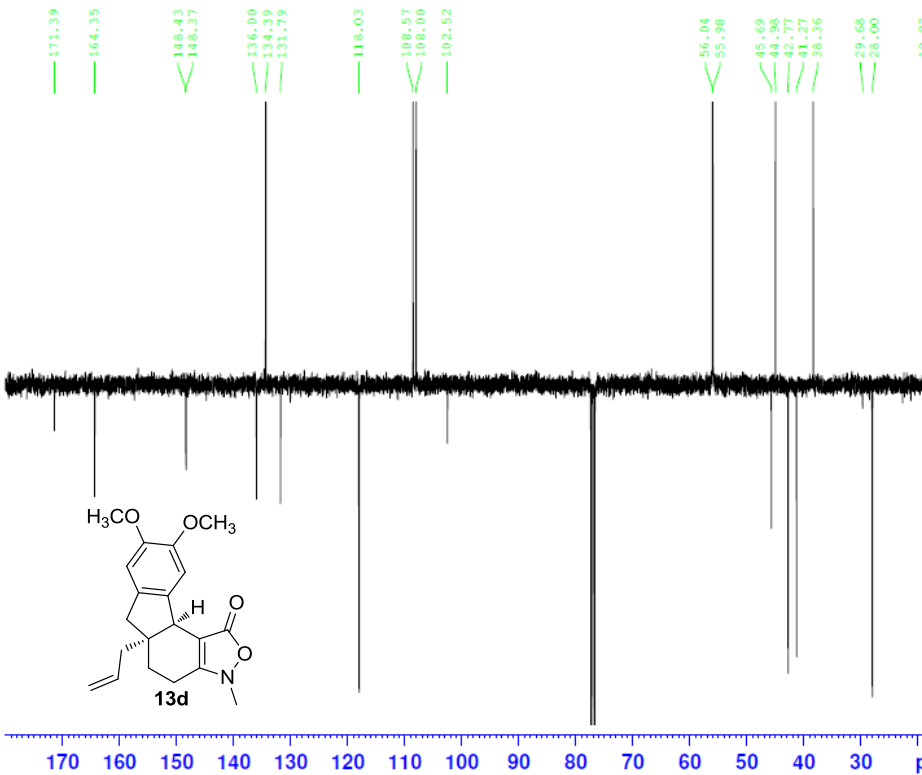

```

Current Data Parameters
NAME      sjb_81_128fp
EXPNO     1
PROCNO    1

F2 - Acquisition Parameters
Date_     20140325
Time      20.07
INSTRUM   spect
PROBHD    5 mm PABBO BB-
PULPROG   jmod
TD         65536
SOLVENT   CDC13
NS         474
DS         4
SWH       24038.461 Hz
FIDRES    0.366798 Hz
AQ        1.3631488 sec
RG         203
DW         20.800 usec
DE         6.50 usec
TE         301.2 K
CNST2     145.0000000
CNST11    1.0000000
D1         2.0000000 sec
D20       0.00689655 sec
D11        1
D12        1
D13        1
D14        1
D15        1
D16        1
D17        1
D18        1
D19        1
D20        1
TD0        1
  
```

```

===== CHANNEL f1 =====
SF01      100.6278593 MHz
NUC1      13C
P1         8.00 usec
P2         16.00 usec
PLW1      56.13299942 W

===== CHANNEL f2 =====
SF02      400.1516006 MHz
NUC2      1H
CPDPRG[2] waltz16
PCPD2     90.00 usec
PLW2     12.14200020 W
PLW12     0.24369000 W
  
```

```

F2 - Processing parameters
SI        32768
SF        100.6177980 MHz
WDW       EM
SSB       0
LB        1.00 Hz
GB        0
PC        1.40
  
```

Area Percent Report

Data Path : C:\msdchem\1\DATA\  
 Data File : sjb\_74\_171fp.D  
 Acq On : 11 Oct 2012 12:24  
 Operator : sjb  
 Sample : sjb\_74\_171fp  
 Misc :  
 ALS Vial : 85 Sample Multiplier: 1  
 Integration Parameters: autoint1.e  
 Integrator: ChemStation  
 Method : C:\msdchem\1\METHODS\JMB2.m  
 Title :  
 Signal : TIC: sjb\_74\_171fp.D\data.ms

| peak # | R.T. min | first scan | max scan | last scan | PK TY | peak height | corr. area | corr. % max. | % of total |
|--------|----------|------------|----------|-----------|-------|-------------|------------|--------------|------------|
| 1      | 8.918    | 753        | 758      | 764       | BV 2  | 35877       | 546275     | 0.14%        | 0.136%     |
| 2      | 10.051   | 949        | 956      | 964       | PV 6  | 33672       | 718804     | 0.18%        | 0.179%     |
| 3      | 13.207   | 1502       | 1507     | 1516      | PV 6  | 42452       | 1193281    | 0.30%        | 0.298%     |
| 4      | 13.489   | 1522       | 1557     | 1582      | PV 2  | 8446940     | 397073139  | 100.00%      | 99.067%    |
| 5      | 13.642   | 1582       | 1584     | 1587      | VV 4  | 63804       | 727438     | 0.18%        | 0.181%     |
| 6      | 13.673   | 1587       | 1589     | 1595      | VV 6  | 37292       | 555213     | 0.14%        | 0.139%     |

Sum of corrected areas: 400814149

JMB2.m Wed Oct 17 15:09:01 2012

Abundance

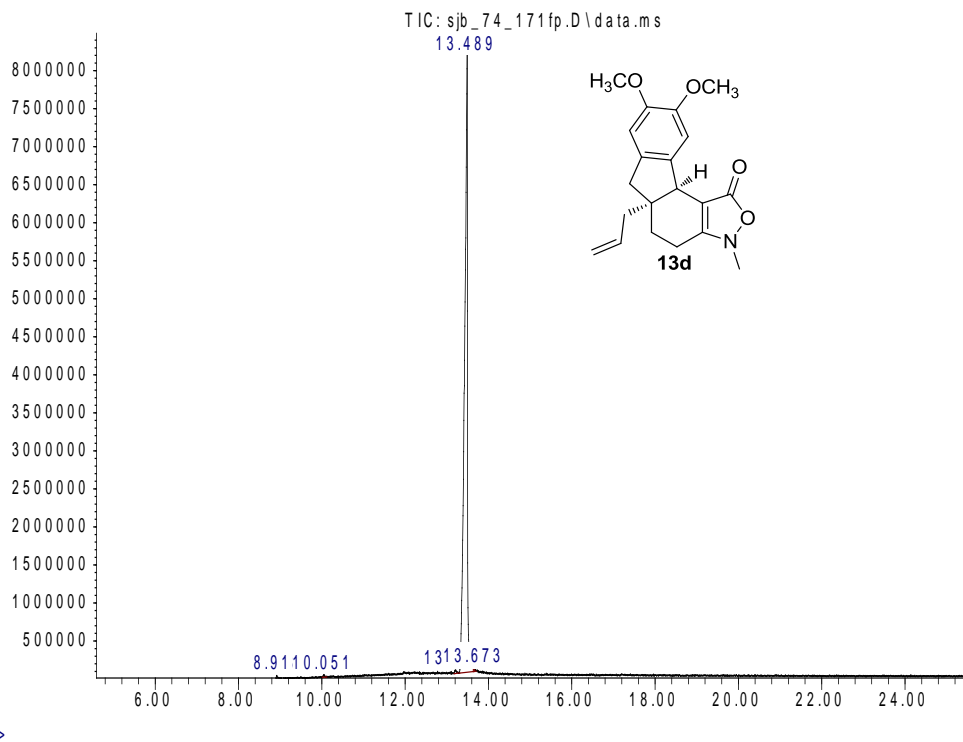

Abundance

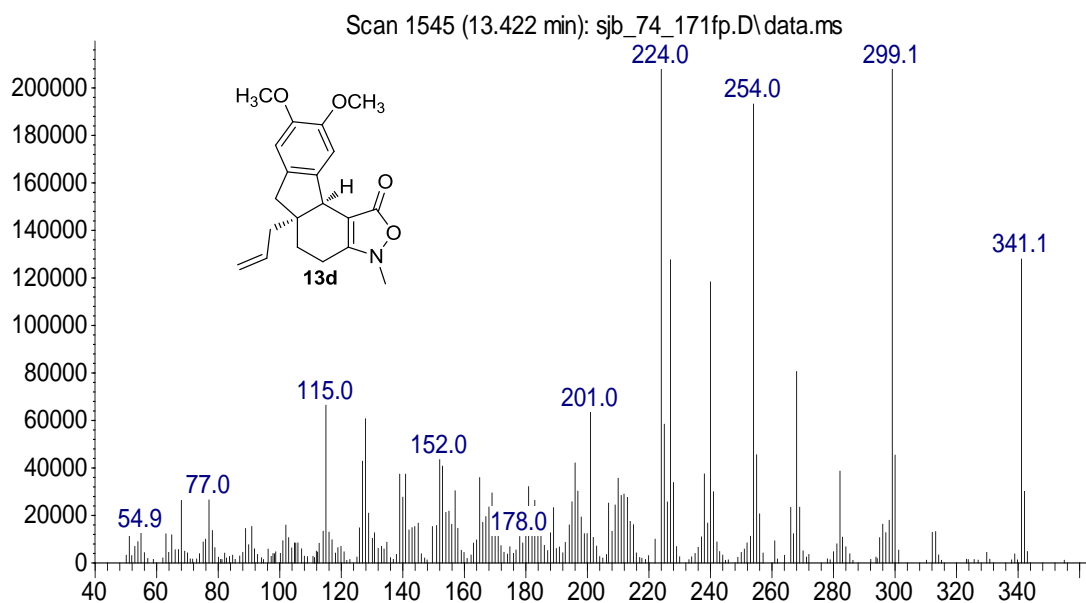

m/z-->

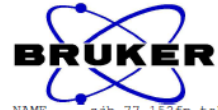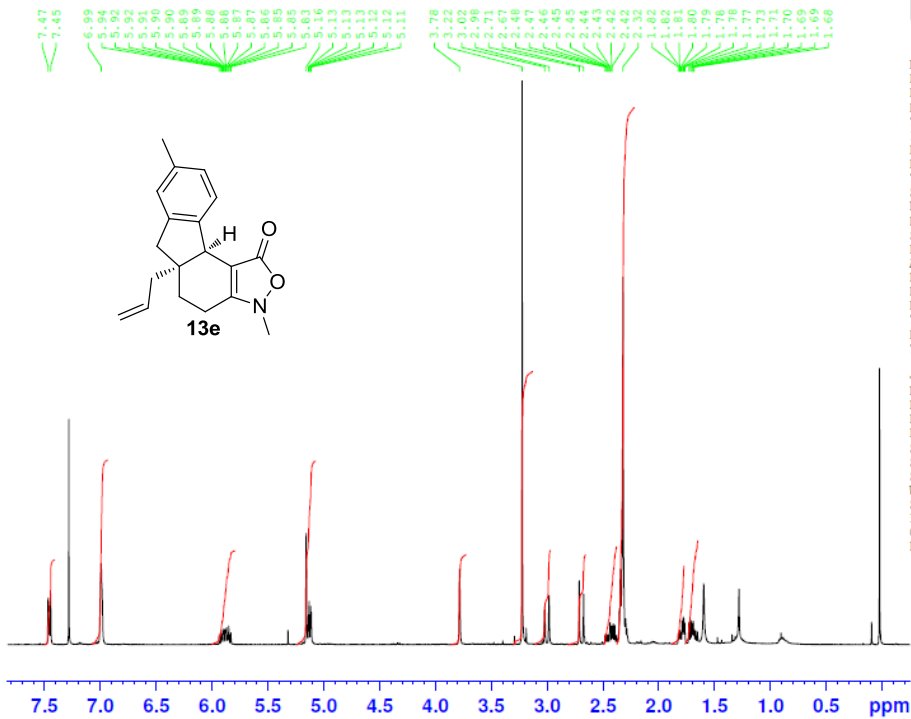

NAME sjb\_77\_152fp take 2  
EXPNO 1  
PROCNO 1  
Date\_ 20130726  
Time 8.01  
INSTRUM spect  
PROBHD 5 mm PABBO BB-  
PULPROG zg30  
TD 65536  
SOLVENT CDC13  
NS 16  
DS 2  
SWH 8223.685 Hz  
FIDRES 0.125483 Hz  
AQ 3.9846387 sec  
RG 203  
DW 60.800 usec  
DE 6.50 usec  
TE 301.2 K  
D1 1.00000000 sec  
TDO 1

----- CHANNEL f1 -----  
NUC1 1H  
P1 12.50 usec  
PL1 -2.00 dB  
PL1W 12.14226913 W  
SFO1 400.1524711 MHz  
SI 32768  
SF 400.1500000 MHz  
WDW EM  
SSB 0  
LB 0.30 Hz  
GB 0  
PC 1.00

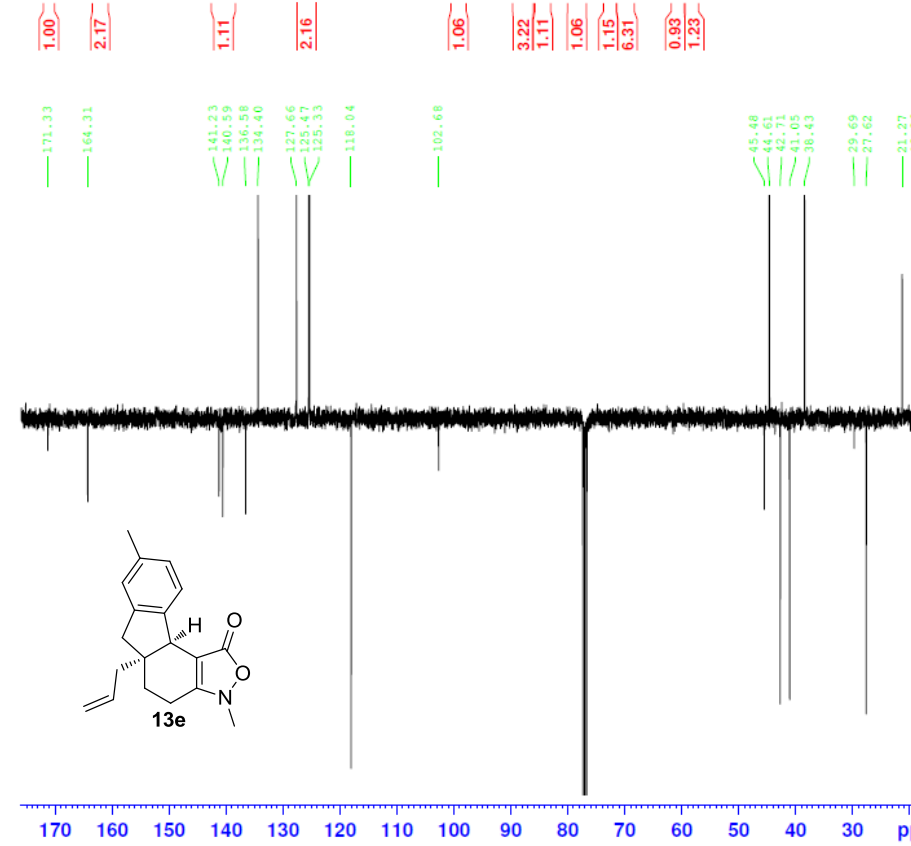

Current Data Parameters  
NAME sjb\_77\_152fp APT  
EXPNO 1  
PROCNO 1

F2 - Acquisition Parameters  
Date\_ 20130726  
Time 9.01  
INSTRUM spect  
PROBHD 5 mm PABBO BB-  
PULPROG jmod  
TD 65536  
SOLVENT CDC13  
NS 991  
DS 4  
SWH 24038.461 Hz  
FIDRES 0.366798 Hz  
AQ 1.3631488 sec  
RG 203  
DW 20.800 usec  
DE 6.50 usec  
TE 301.2 K  
CNS12 145.0000000  
CNS11 1.0000000  
D1 2.00000000 sec  
D20 0.00689655 sec  
TDO 1

----- CHANNEL f1 -----  
NUC1 13C  
P1 8.00 usec  
F2 16.00 usec  
PL1 -2.00 dB  
PL1W 56.13311005 W  
SFO1 100.6278593 MHz

----- CHANNEL f2 -----  
CPDPRG[2] waltz16  
NUC2 1H  
PCPD2 80.00 usec  
PL2 -2.00 dB  
PL12 14.00 dB  
PL2W 12.14226913 W  
PL12W 0.30500001 W  
SFO2 400.1515990 MHz

F2 - Processing parameters  
SI 32768  
SF 100.6177980 MHz  
WDW EM  
SSB 0  
LB 1.00 Hz  
GB 0  
PC 1.40

Area Percent Report

Data Path : C:\msdchem\1\DATA\  
Data File : sjb\_77\_152fp.D  
Acq On : 16 Jul 2013 17:41  
Operator : sjb  
Sample : sjb\_77\_152fp  
Misc :  
ALS Vial : 85 Sample Multiplier: 1  
Integration Parameters: autoint1.e  
Integrator: ChemStation  
Method : C:\msdchem\1\METHODS\ckr3.m  
Title :

Signal : TIC: sjb\_77\_152fp.D\data.ms

| peak # | R.T. min | first scan | max scan | last scan | PK TY | peak height | corr. area | corr. % max. | % of total |
|--------|----------|------------|----------|-----------|-------|-------------|------------|--------------|------------|
| 1      | 11.207   | 1139       | 1158     | 1202      | BV    | 11463397    | 276482325  | 100.00%      | 95.401%    |
| 2      | 17.559   | 2229       | 2268     | 2297      | M5    | 248076      | 13329377   | 4.82%        | 4.599%     |

Sum of corrected areas: 289811703

ckr3.m Mon May 12 16:00:02 2014

Abundance

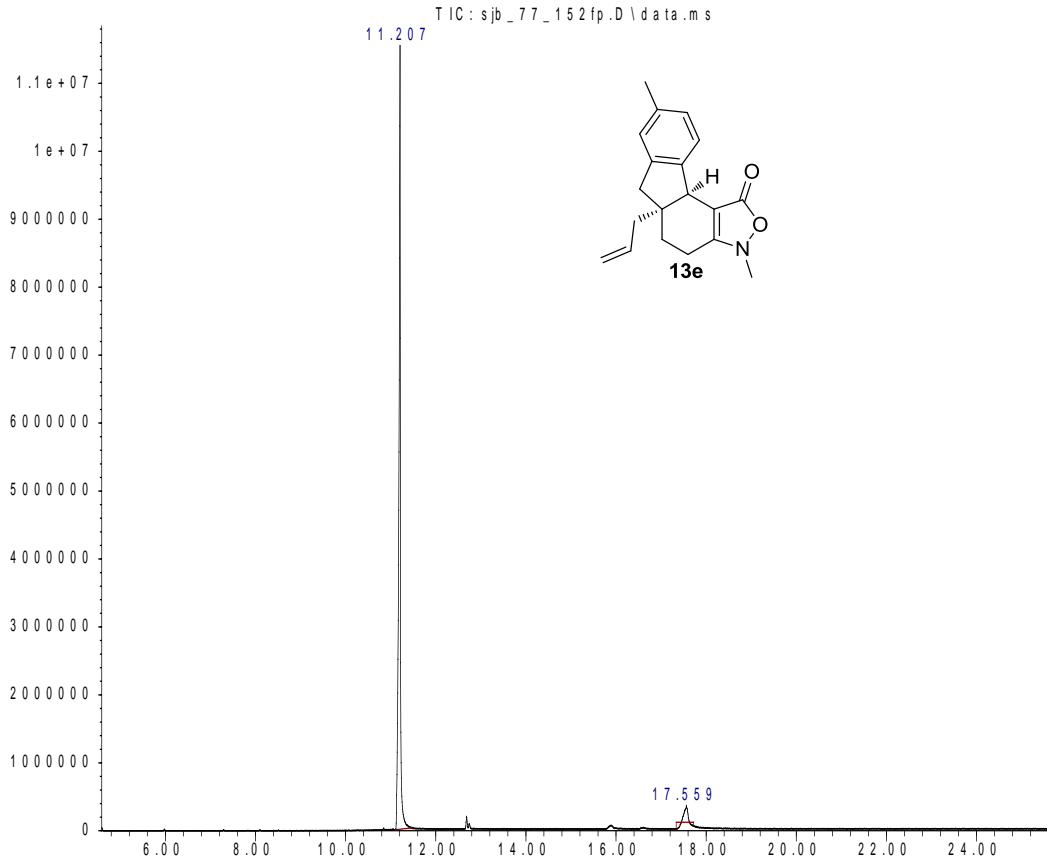

Time-->

Abundance

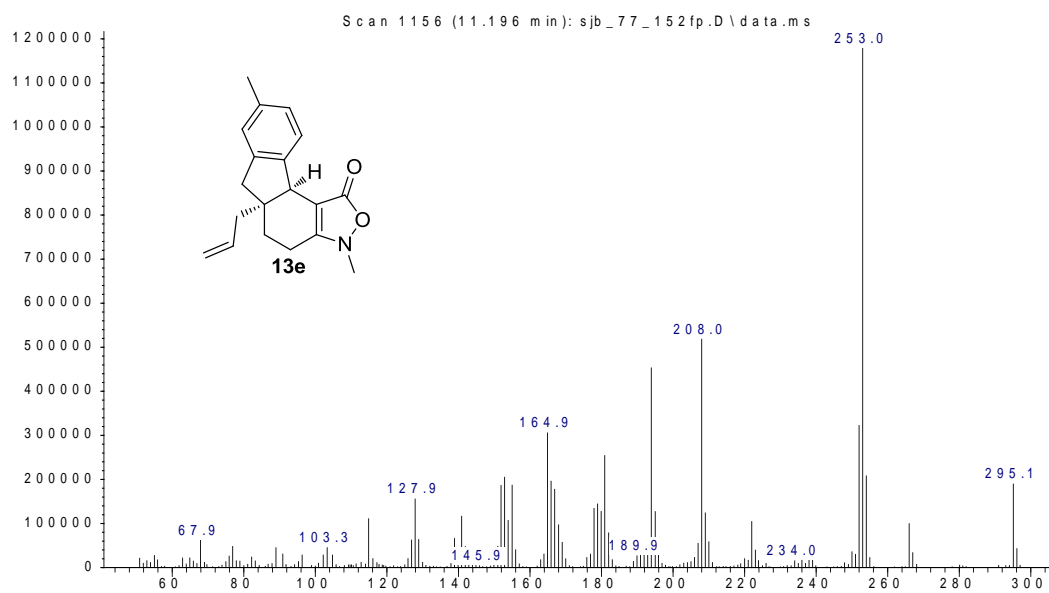

m/z-->

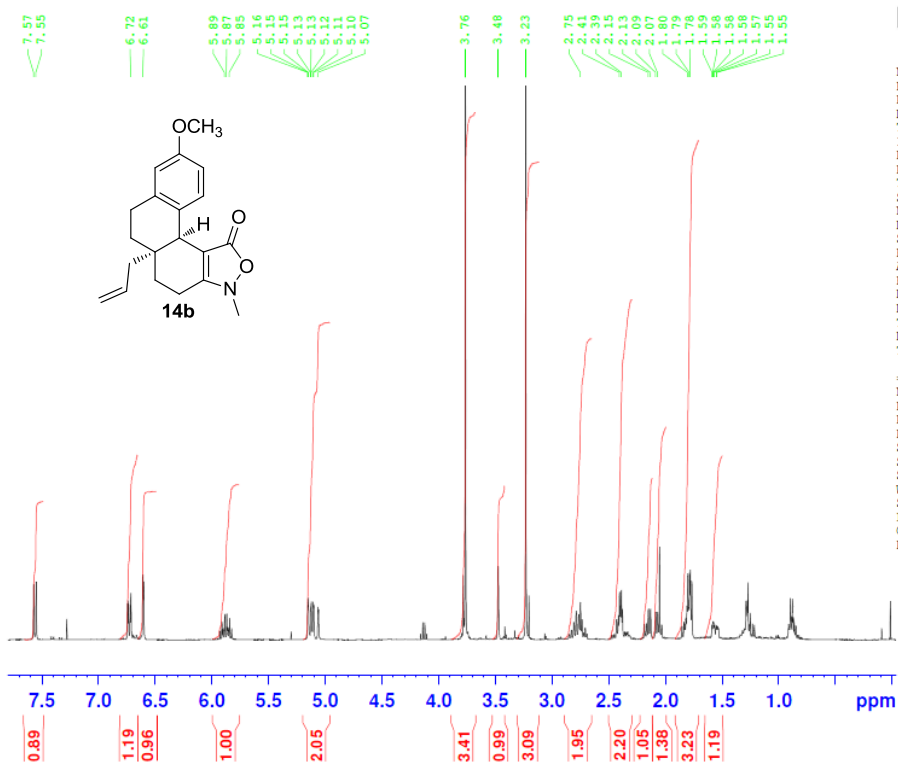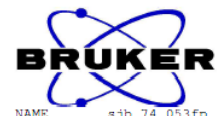

```

NAME      sjb_74_053fp
EXPNO     1
PROCNO    1
Date_     20120703
Time      13.50
INSTRUM   spect
PROBHD    5 mm PABBO BB-
PULPROG   zg30
TD         65536
SOLVENT   CDCl3
NS         16
DS         2
SWH       8223.685 Hz
FIDRES    0.125483 Hz
AQ         3.9846387 sec
RG         40.3
DW         60.800 usec
DE         6.50 usec
TE         301.3 K
D1         1.00000000 sec
TDO        1

===== CHANNEL f1 =====
NUC1       1H
P1         12.50 usec
PL1        -2.00 dB
PL1W       12.14226913 W
SFO1       400.1524711 MHz
SI         32768
SF         400.1500000 MHz
WDW        EM
SSB        0
LB         0.30 Hz
GB         0
PC         1.00
  
```

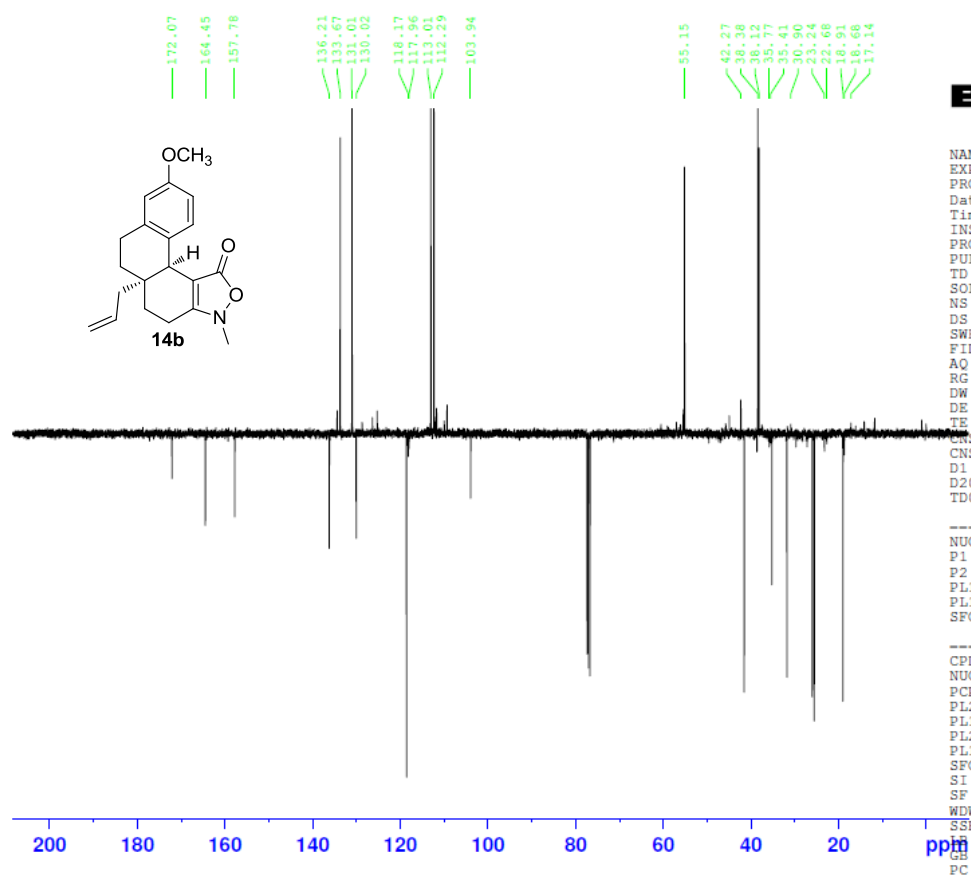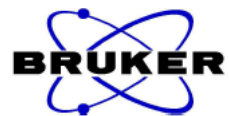

```

NAME      sjb_77_094fp 13CAPT
EXPNO     1
PROCNO    1
Date_     20130531
Time      9.22
INSTRUM   spect
PROBHD    5 mm PABBO BB-
PULPROG   jmod
TD         65536
SOLVENT   CDCl3
NS         1024
DS         4
SWH       21929.824 Hz
FIDRES    0.334623 Hz
AQ         1.4942708 sec
RG         203
DW         22.800 usec
DE         6.50 usec
TE         301.2 K
CNST2     145.0000000
CNST11    1.0000000
D1         2.00000000 sec
D20        0.00689655 sec
TDO        1

----- CHANNEL f1 -----
NUC1       13C
P1         8.00 usec
P2         16.00 usec
PL1        -2.00 dB
PL1W       56.13311005 W
SFO1       100.6277931 MHz

----- CHANNEL f2 -----
CPDPRG2   waltz16
NUC2       1H
PCPD2     80.00 usec
PL2        -2.00 dB
PL12       14.00 dB
PL2W       12.14226913 W
PL12W     0.30500001 W
SFO2       400.1515655 MHz
SI         32768
SF         100.6177980 MHz
WDW        EM
SSB        0
LB         1.00 Hz
GB         0
PC         1.40
  
```



Area Percent Report

Data Path : C:\msdchem\1\DATA\  
 Data File : sjb\_74\_053fp.D  
 Acq On : 3 Jul 2012 12:50  
 Operator : sjb  
 Sample : sjb\_74\_053fp  
 Misc :  
 ALS Vial : 100 Sample Multiplier: 1  
 Integration Parameters: autoint1.e  
 Integrator: ChemStation  
 Method : C:\msdchem\1\METHODS\JMB2.m  
 Title :  
 Signal : TIC: sjb\_74\_053fp.D\data.ms

| peak #                  | R.T. min | first scan | max scan | last scan | PK TY | peak height | corr. area | corr. % max. | % of total |
|-------------------------|----------|------------|----------|-----------|-------|-------------|------------|--------------|------------|
| 1                       | 9.694    | 882        | 894      | 912       | BB    | 34783       | 1341908    | 2.20%        | 2.098%     |
| 2                       | 12.674   | 1367       | 1414     | 1420      | BV    | 87897       | 861272     | 1.42%        | 1.346%     |
| 3                       | 13.087   | 1474       | 1487     | 1498      | BV 4  | 45615       | 902735     | 1.48%        | 1.411%     |
| 4                       | 13.877   | 1595       | 1625     | 1647      | PV 2  | 1452537     | 60865753   | 100.00%      | 95.145%    |
| Sum of corrected areas: |          |            |          |           |       |             |            | 63971668     |            |

JMB2.m Wed Oct 17 15:30:37 2012

Abundance

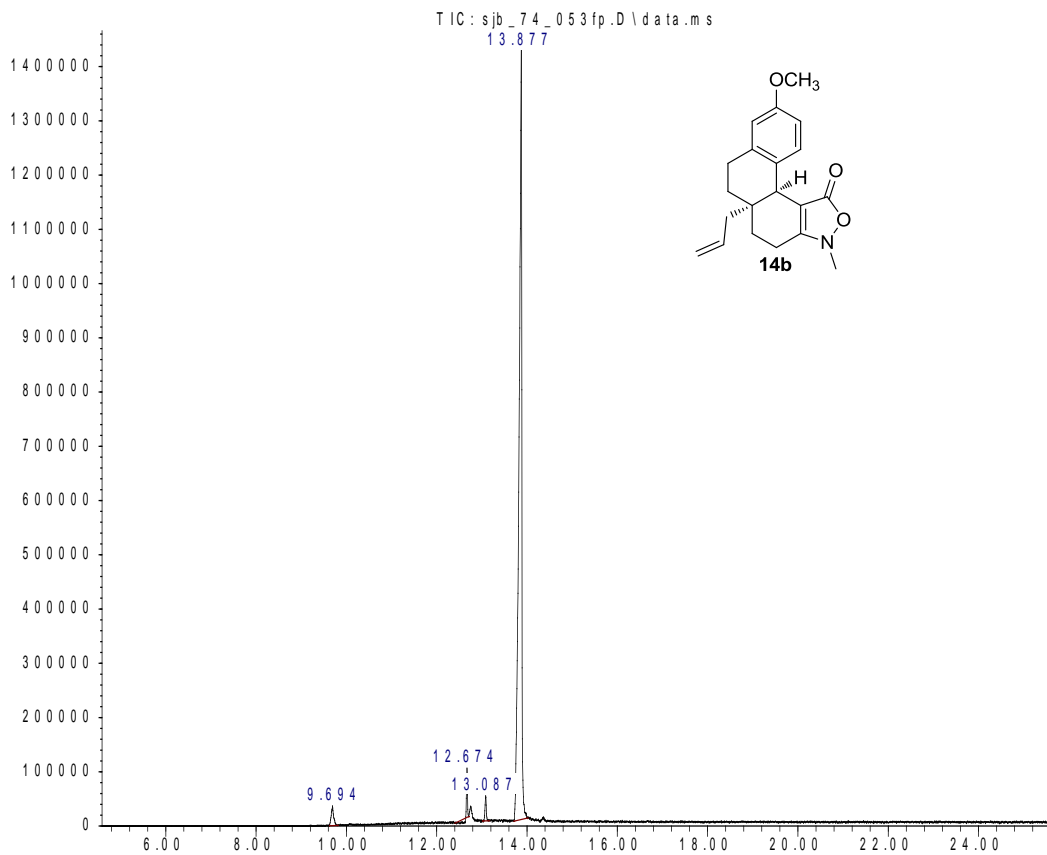

Abundance

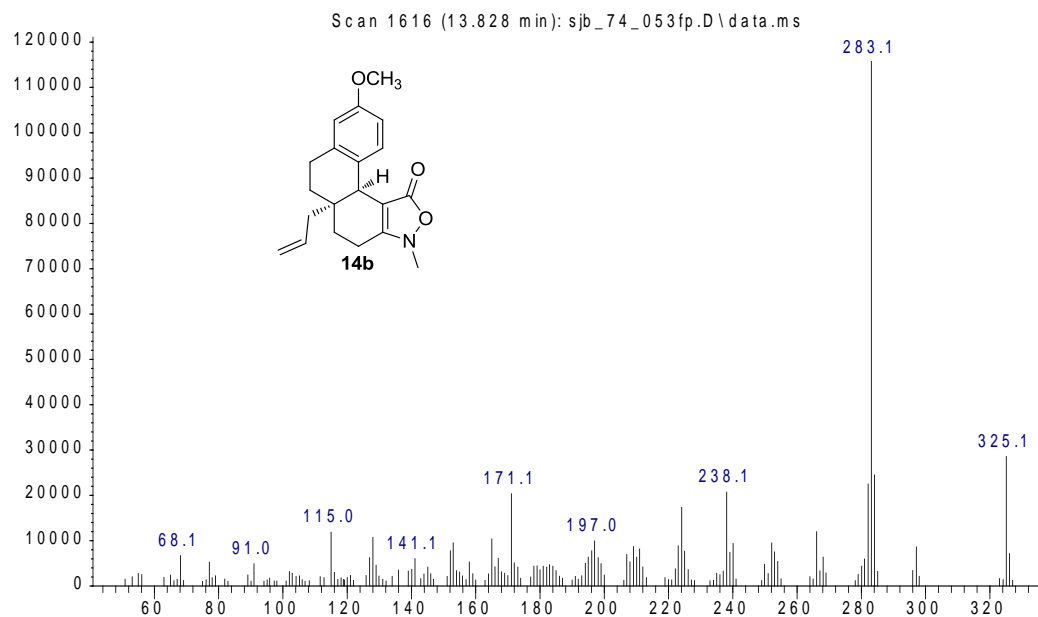

m/z-->

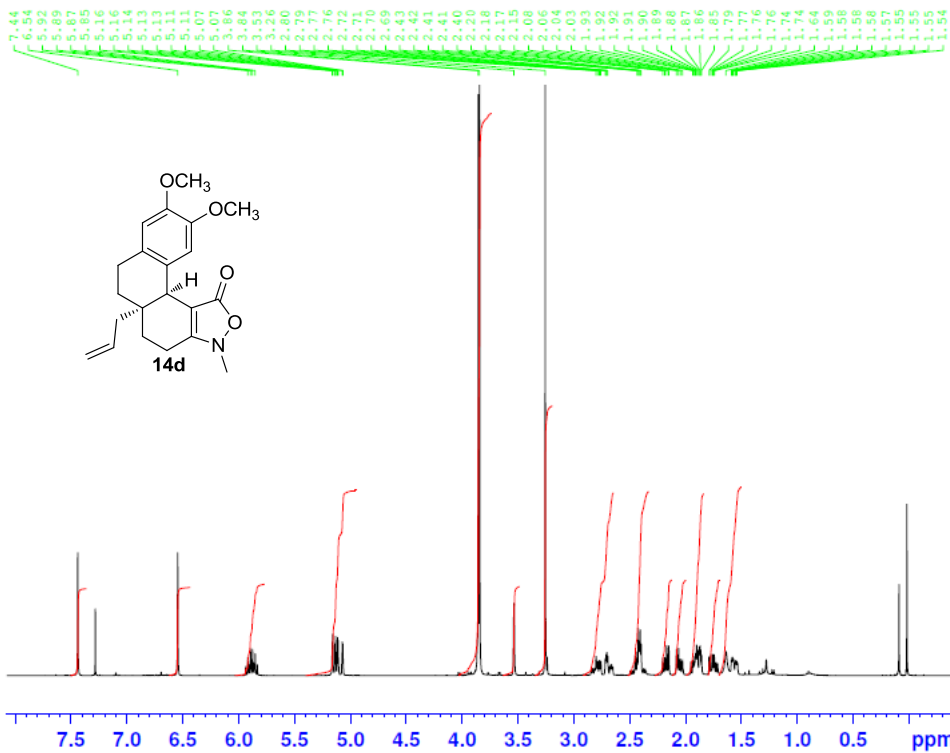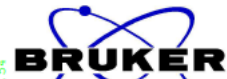

NAME sjb\_77\_002fp take 2  
 EXPNO 1  
 PROCNO 1  
 Date\_ 20130805  
 Time 11.14  
 INSTRUM spect  
 PROBHD 5 mm PABBO BB-  
 PULPROG zg30  
 TD 65536  
 SOLVENT CDC13  
 NS 16  
 DS 2  
 SWH 8223.685 Hz  
 FIDRES 0.125483 Hz  
 AQ 3.9846387 sec  
 RG 181  
 DW 60.800 usec  
 DE 6.50 usec  
 TE 301.2 K  
 D1 1.00000000 sec  
 TD0 1

----- CHANNEL f1 -----  
 NUC1 1H  
 P1 12.50 usec  
 PL1 -2.00 dB  
 PL1W 12.14226913 W  
 SFO1 400.1524711 MHz  
 SI 32768  
 SF 400.1500000 MHz  
 WDW EM  
 SSB 0  
 LB 0.30 Hz  
 GB 0  
 PC 1.00

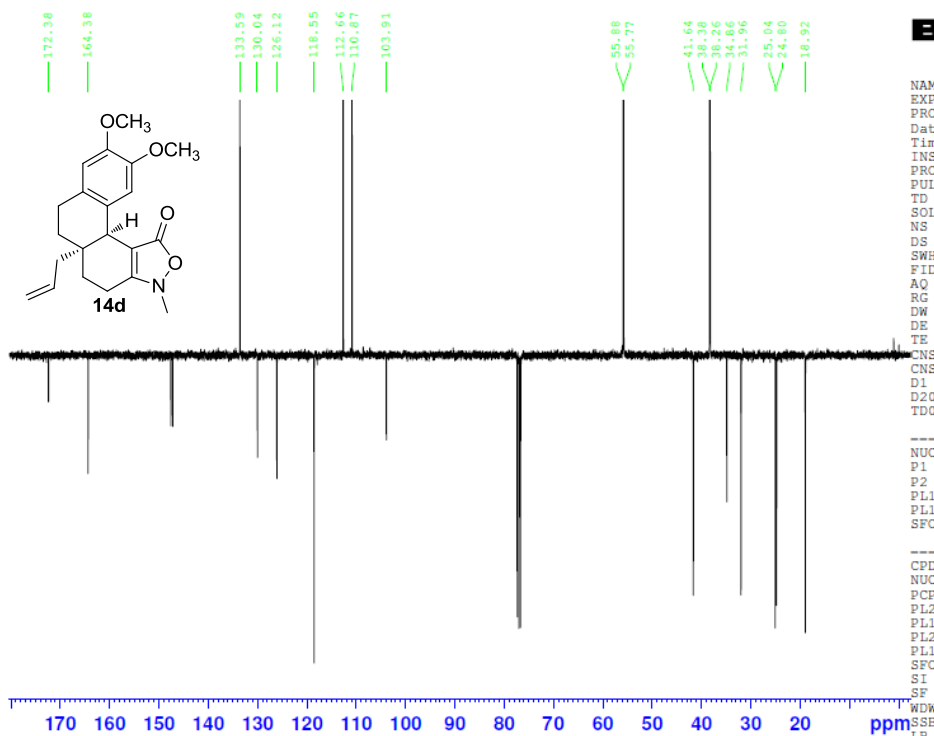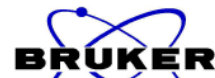

NAME sjb\_77\_002 13CAPT  
 EXPNO 1  
 PROCNO 1  
 Date\_ 20121207  
 Time 9.37  
 INSTRUM spect  
 PROBHD 5 mm PABBO BB-  
 PULPROG jmod  
 TD 65536  
 SOLVENT CDC13  
 NS 1024  
 DS 4  
 SWH 18382.354 Hz  
 FIDRES 0.280492 Hz  
 AQ 1.7826293 sec  
 RG 203  
 DW 27.200 usec  
 DE 6.50 usec  
 TE 301.2 K  
 CNST2 145.0000000  
 CNST11 1.0000000  
 D1 2.00000000 sec  
 D20 0.00689655 sec  
 TD0 1

----- CHANNEL f1 -----  
 NUC1 13C  
 P1 8.00 usec  
 P2 16.00 usec  
 PL1 -2.00 dB  
 PL1W 56.13311005 W  
 SFO1 100.6267469 MHz

----- CHANNEL f2 -----  
 CPDPRG2 waltz16  
 NUC2 1H  
 PCPD2 80.00 usec  
 PL2 -2.00 dB  
 PL12 14.00 dB  
 PL2W 12.14226913 W  
 PL12W 0.30500001 W  
 SFO2 400.1514987 MHz  
 SI 32768  
 SF 100.6177980 MHz  
 WDW EM  
 SSB 0  
 LB 1.00 Hz  
 GB 0  
 PC 1.40

Area Percent Report

Data Path : C:\msdchem\1\DATA\  
 Data File : sjb\_72\_195fp.D  
 Acq On : 1 May 2012 17:23  
 Operator : sjb  
 Sample : sjb\_72\_195fp  
 Misc :  
 ALS Vial : 45 Sample Multiplier: 1

Integration Parameters: autoint1.e  
 Integrator: ChemStation

Method : C:\msdchem\1\METHODS\JMB2.m  
 Title :

Signal : TIC: sjb\_72\_195fp.D\data.ms

| peak # | R.T. min | first scan | max scan | last scan | PK TY | peak height | corr. area | corr. % max. | % of total |
|--------|----------|------------|----------|-----------|-------|-------------|------------|--------------|------------|
| 1      | 13.743   | 1587       | 1601     | 1616      | PV 9  | 232062      | 6716431    | 2.01%        | 1.928%     |
| 2      | 13.839   | 1616       | 1618     | 1624      | VV 6  | 23517       | 354612     | 0.11%        | 0.102%     |
| 3      | 14.267   | 1683       | 1693     | 1708      | PV 6  | 188248      | 5335080    | 1.59%        | 1.531%     |
| 4      | 15.234   | 1817       | 1862     | 1912      | PV    | 5381726     | 334739484  | 100.00%      | 96.071%    |
| 5      | 15.673   | 1921       | 1938     | 1951      | PV 10 | 40476       | 1284013    | 0.38%        | 0.369%     |

Sum of corrected areas: 348429620

Abundance

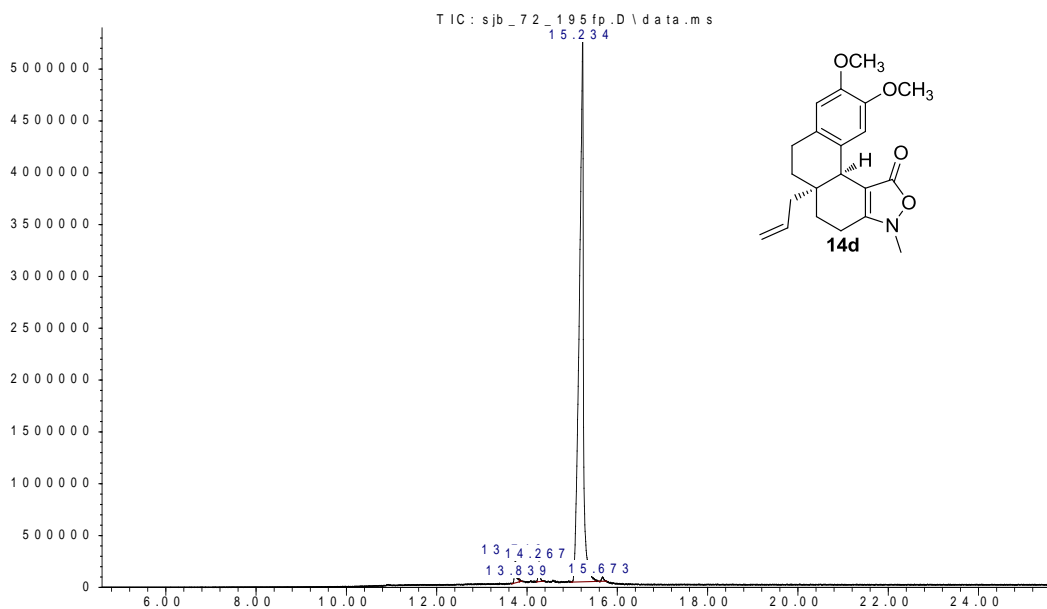

Time-->

Abundance

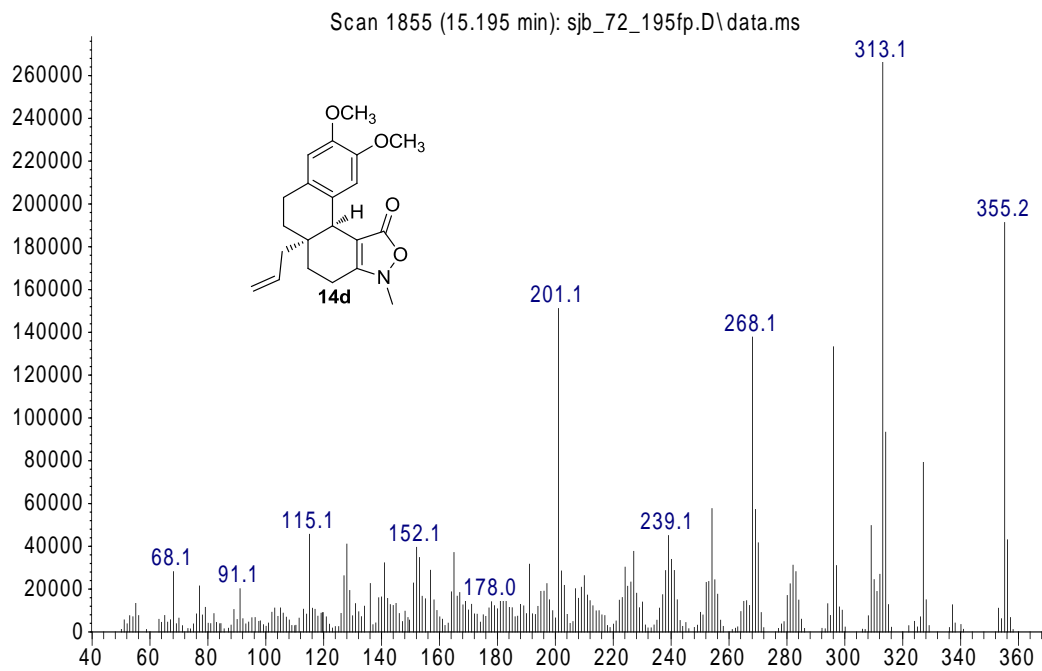

m/z-->

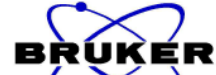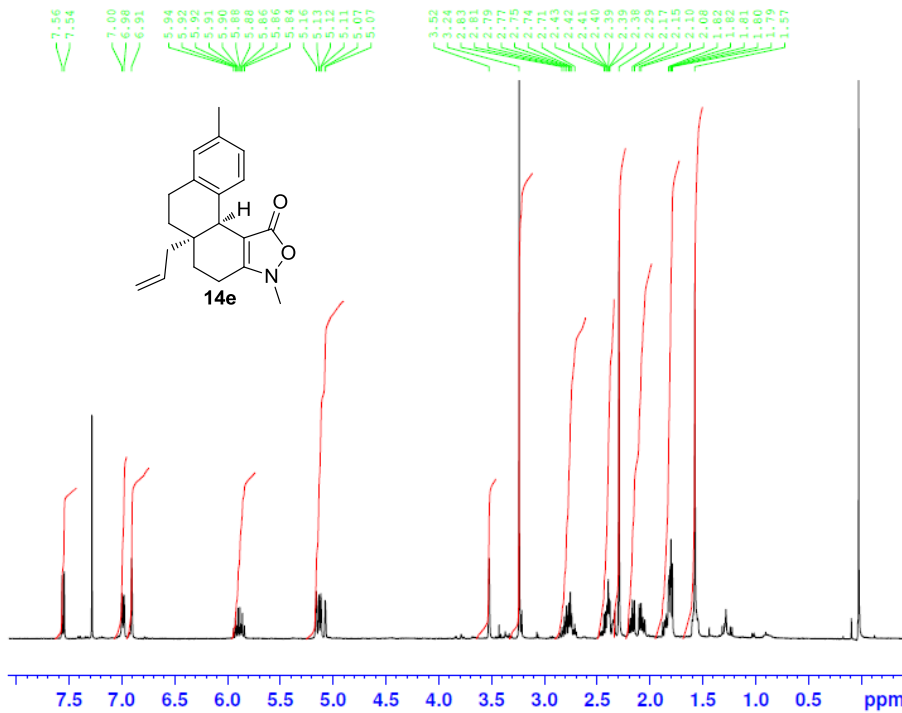

NAME sjb\_77\_041fp take 2  
EXPNO 1  
PROCNO 1  
Date\_ 20130802  
Time 14.24  
INSTRUM spect  
PROBHD 5 mm PABBO BB-  
PULPROG zg30  
TD 65536  
SOLVENT CDCl3  
NS 16  
DS 2  
SWH 8223.685 Hz  
FIDRES 0.125483 Hz  
AQ 3.9846387 sec  
RG 203  
DW 60.800 usec  
DE 6.50 usec  
TE 301.2 K  
D1 1.00000000 sec  
TD0 1

----- CHANNEL f1 -----  
NUC1 1H  
P1 12.50 usec  
PL1 -2.00 dB  
PL1W 12.14226913 W  
SFO1 400.1524711 MHz  
SI 32768  
SF 400.1500000 MHz  
WDW EM  
SSB 0  
LB 0.30 Hz  
GB 0  
PC 1.00

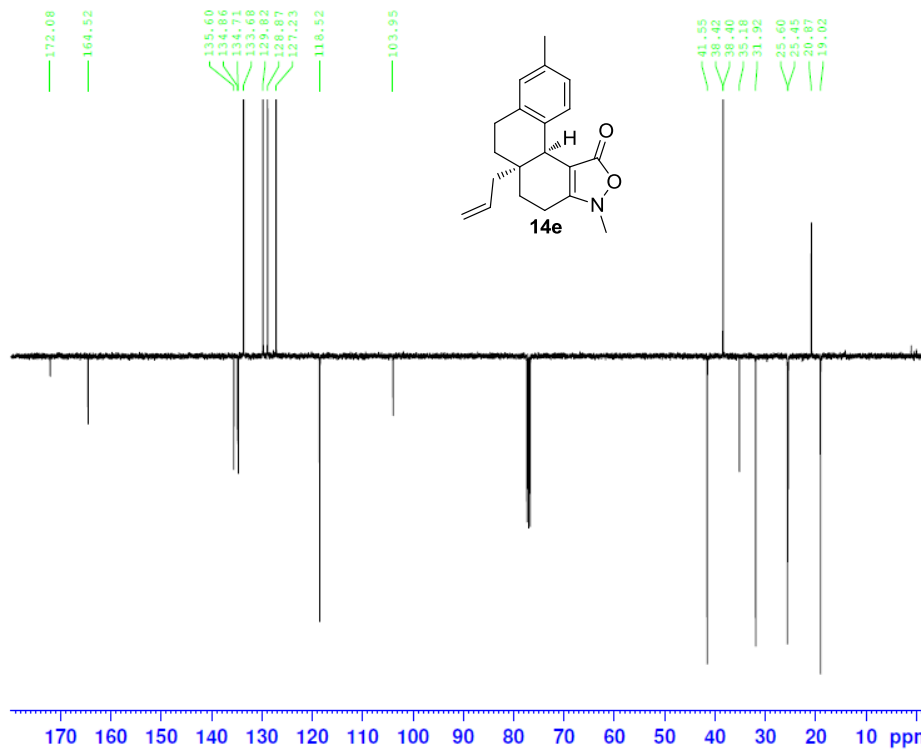

Current Data Parameters  
NAME sjb\_77\_032fp APT  
EXPNO 1  
PROCNO 1

F2 - Acquisition Parameters  
Date\_ 20130115  
Time 13.42  
INSTRUM spect  
PROBHD 5 mm PABBO BB-  
PULPROG jmod  
TD 65536  
SOLVENT CDCl3  
NS 1024  
DS 4  
SWH 18382.354 Hz  
FIDRES 0.280492 Hz  
AQ 1.7825792 sec  
RG 203  
DW 27.200 usec  
DE 6.50 usec  
TE 299.5 K  
CNST2 145.0000000  
CNST11 1.0000000  
D1 2.00000000 sec  
D20 0.00689655 sec  
TD0 1

----- CHANNEL f1 -----  
NUC1 13C  
P1 8.00 usec  
P2 16.00 usec  
PL1 -2.00 dB  
PL1W 56.13311005 W  
SFO1 100.6266983 MHz

----- CHANNEL f2 -----  
CPDPRG[2] waltz16  
NUC2 1H  
PCPD2 80.00 usec  
PL2 -2.00 dB  
PL12 14.00 dB  
PL2W 12.14226913 W  
PL12W 0.30500001 W  
SFO2 400.1515831 MHz

F2 - Processing parameters  
SI 32768  
SF 100.6177980 MHz  
WDW EM  
SSB 0  
LB 1.00 Hz  
GB 0  
PC 1.40

Area Percent Report

Data Path : C:\msdchem\1\DATA\  
Data File : sjb\_77\_041fp.D  
Acq On : 24 Jan 2013 16:52  
Operator : sjb  
Sample : sjb\_77\_041fp  
Misc :  
ALS Vial : 10 Sample Multiplier: 1

Integration Parameters: autoint1.e  
Integrator: ChemStation

Method : C:\msdchem\1\5973N\PRECISION.M  
Title :

Signal : TIC: sjb\_77\_041fp.D\data.ms

| peak # | R.T. min | first scan | max scan | last scan | PK TY | peak height | corr. area | corr. % max. | % of total |
|--------|----------|------------|----------|-----------|-------|-------------|------------|--------------|------------|
| 1      | 11.479   | 1205       | 1205     | 1205      | M     | -467102     | 0          | 0.00%        | 0.000%     |
| 2      | 11.616   | 1227       | 1229     | 1232      | VV 3  | 33842       | 476512     | 0.14%        | 0.141%     |
| 3      | 11.739   | 1249       | 1251     | 1254      | VV 4  | 30352       | 427668     | 0.13%        | 0.127%     |
| 4      | 11.815   | 1264       | 1264     | 1264      | M4    | -204808     | 0          | 0.00%        | 0.000%     |
| 5      | 12.336   | 1336       | 1355     | 1392      | VV    | 11066989    | 336059983  | 100.00%      | 99.591%    |
| 6      | 16.208   | 2026       | 2032     | 2041      | PV 10 | 18378       | 475433     | 0.14%        | 0.141%     |

Sum of corrected areas: 337439597

Abundance

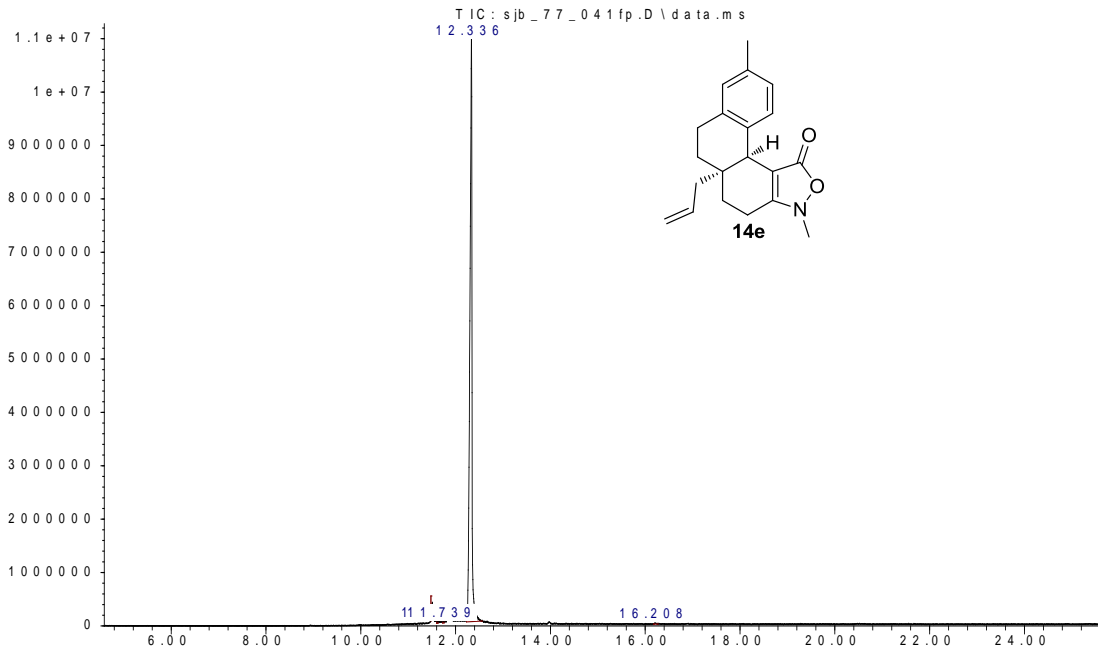

Time-->

Abundance

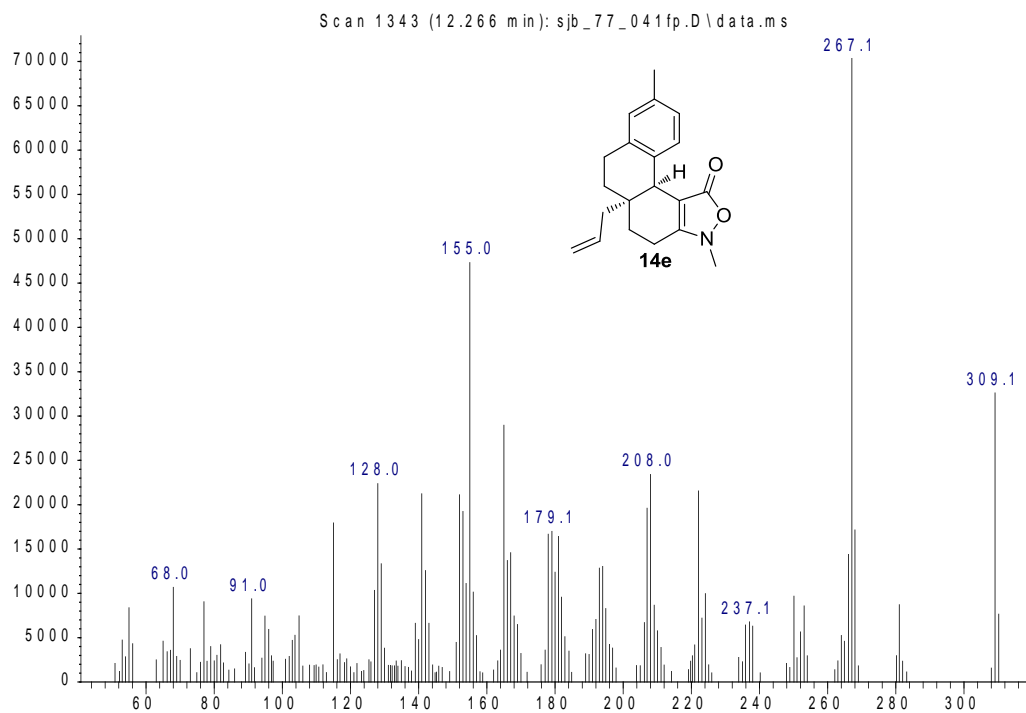

m/z-->



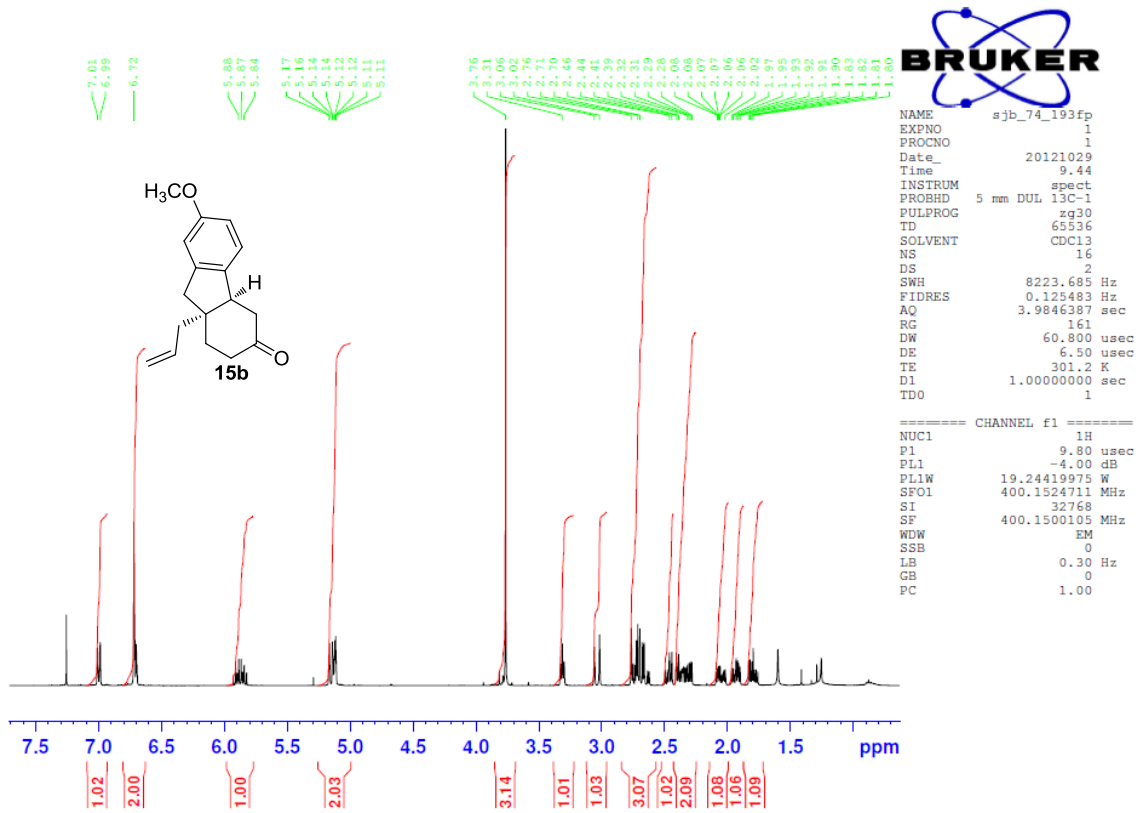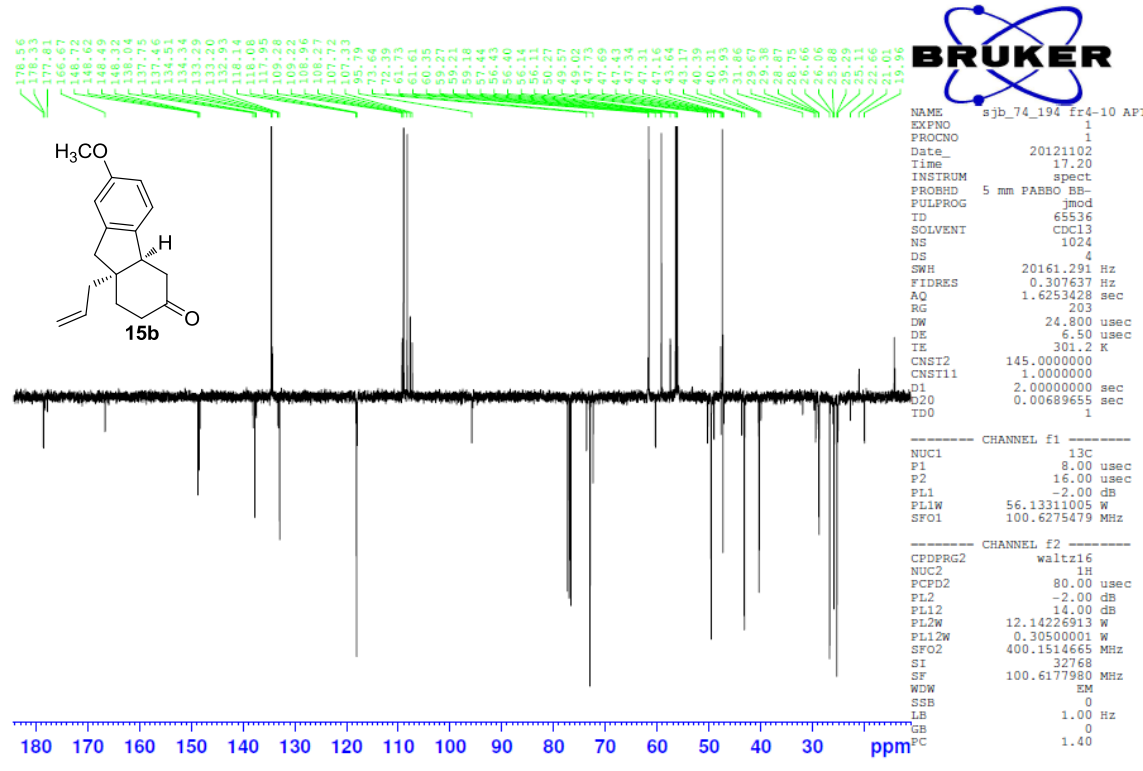

Area Percent Report

Data Path : C:\msdchem\1\DATA\  
Data File : sjb\_74\_193fp.D  
Acq On : 26 Oct 2012 9:51  
Operator : sjb  
Sample : sjb\_74\_193fp  
Misc :  
ALS Vial : 25 Sample Multiplier: 1

Integration Parameters: autoint1.e  
Integrator: ChemStation

Method : C:\msdchem\1\METHODS\JMB2.m  
Title :

Signal : TIC: sjb\_74\_193fp.D\data.ms

| peak # | R.T. min | first scan | max scan | last scan | PK TY | peak height | corr. area | corr. % max. | % of total |
|--------|----------|------------|----------|-----------|-------|-------------|------------|--------------|------------|
| 1      | 8.048    | 601        | 606      | 619       | BB 2  | 136209      | 1898997    | 0.21%        | 0.206%     |
| 2      | 8.547    | 670        | 693      | 720       | BV    | 40169943    | 918832725  | 100.00%      | 99.531%    |
| 3      | 8.720    | 720        | 723      | 739       | VV 7  | 61335       | 1679808    | 0.18%        | 0.182%     |
| 4      | 9.560    | 862        | 870      | 875       | BV 3  | 63401       | 749249     | 0.08%        | 0.081%     |

Sum of corrected areas: 923160778

JMB2.m Thu Nov 08 10:08:59 2012

Abundance

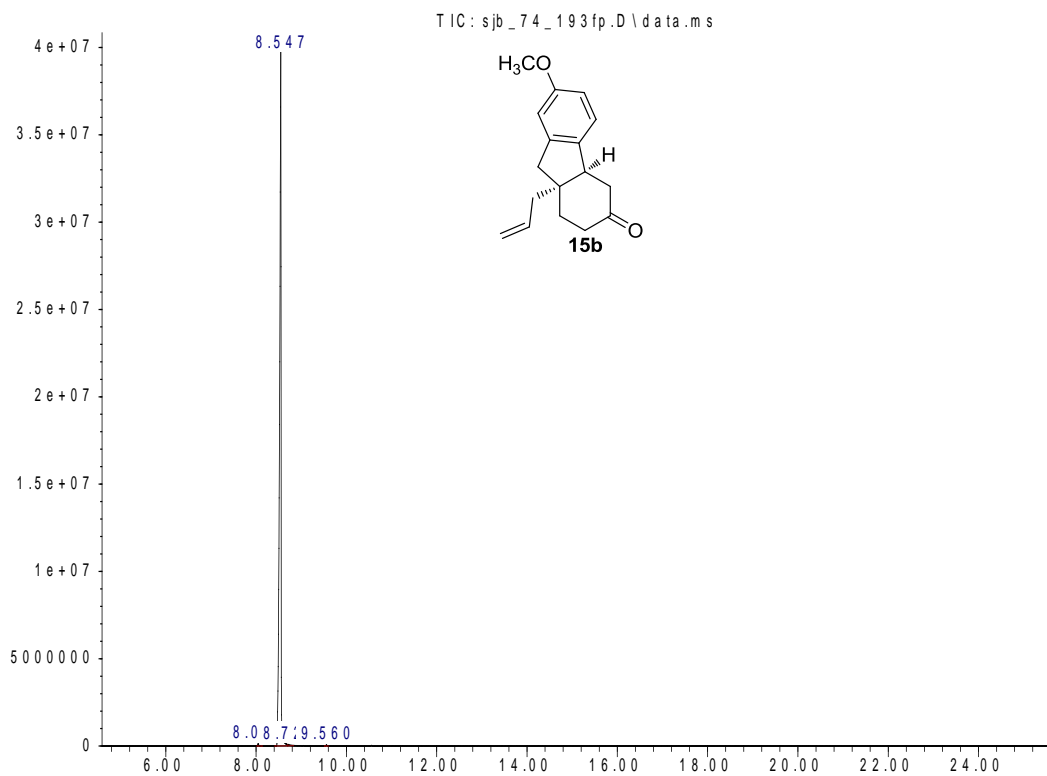

Time-->

Abundance

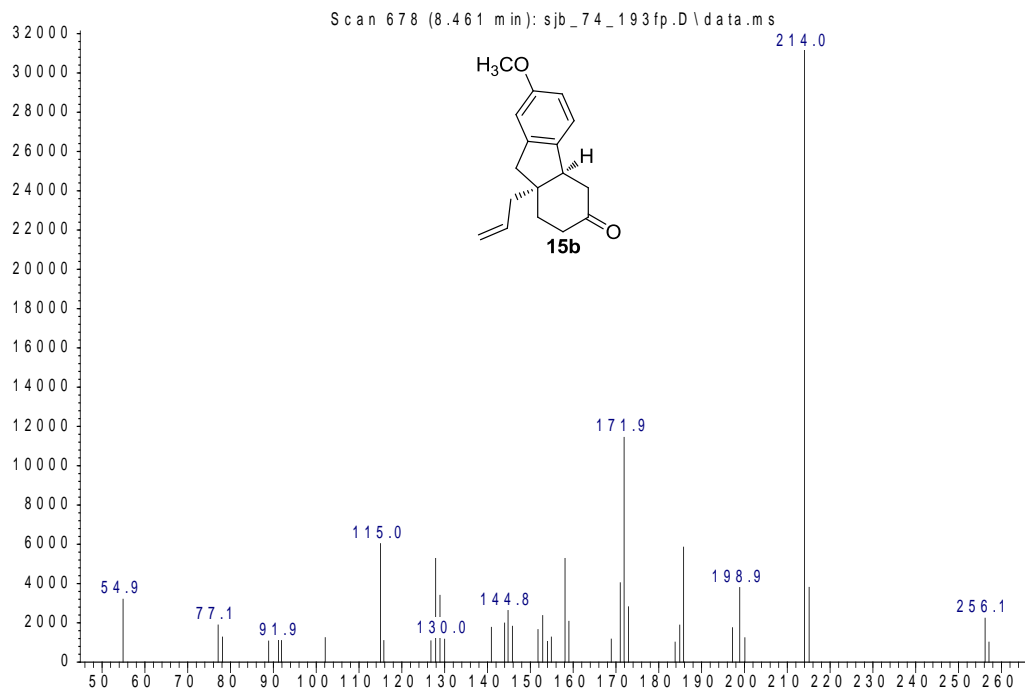

m/z-->

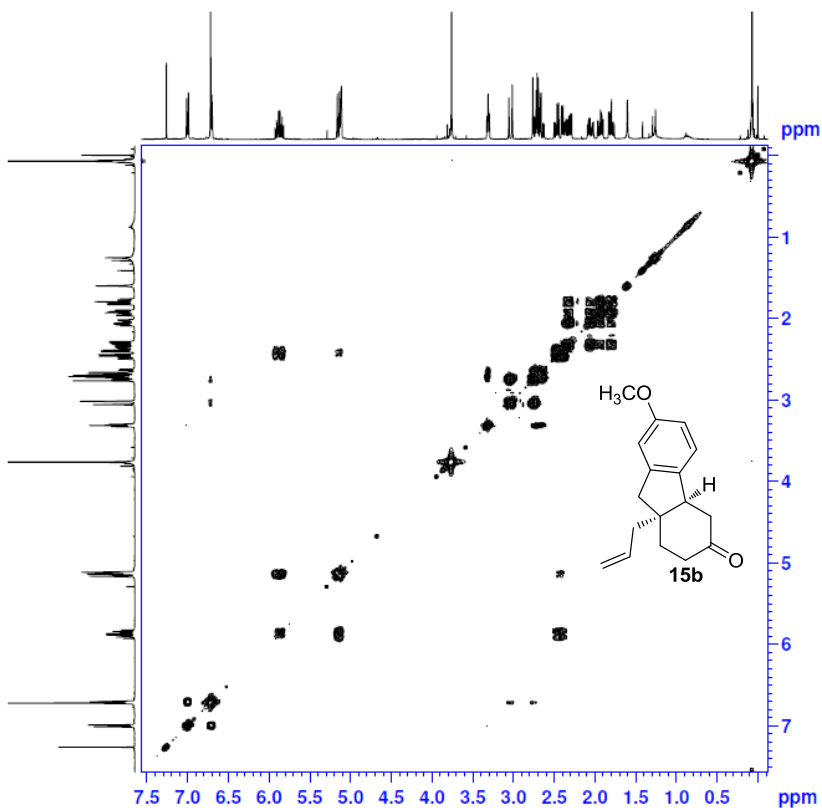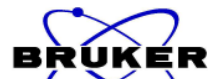

```

NAME      sjb_74_193fp
EXPNO     3
PROCNO    1
Date_     20121031
Time      8.47
INSTRUM   spect
PROBHD    5 mm DUL 13C-1
PULPROG   cosyppgf
TD         2048
SOLVENT   CDCl3
NS         3
DS         8
SWH        3078.818 Hz
FIDRES     1.503329 Hz
AQ         0.3326452 sec
RG         64
DW         162.400 usec
DE         6.50 usec
TE         301.1 K
D0         0.00000300 sec
D1         1.4869198 sec
D13        0.00000400 sec
D16        0.00020000 sec
IN0        0.00032480 sec
  
```

```

----- CHANNEL f1 -----
NUC1      1H
P1         9.80 usec
PL1        -4.00 dB
PL1W      19.24419975 W
SF01      400.1515004 MHz
  
```

```

----- GRADIENT CHANNEL -----
GPNAM1    SINE.100
GP21      10.00 %
P16       1000.00 usec
NDO       1
TD        128
SF01      400.1515 MHz
FIDRES    24.052856 Hz
SW        7.694 ppm
FMODE     GF
SI        1024
SF        400.1500105 MHz
WDW       SINE
SSB       0
LB        0.00 Hz
GB        0
PC        1.00
SI        1024
MC2       GF
SF        400.1500105 MHz
WDW       SINE
SSB       0
LB        0.00 Hz
GB        0
  
```

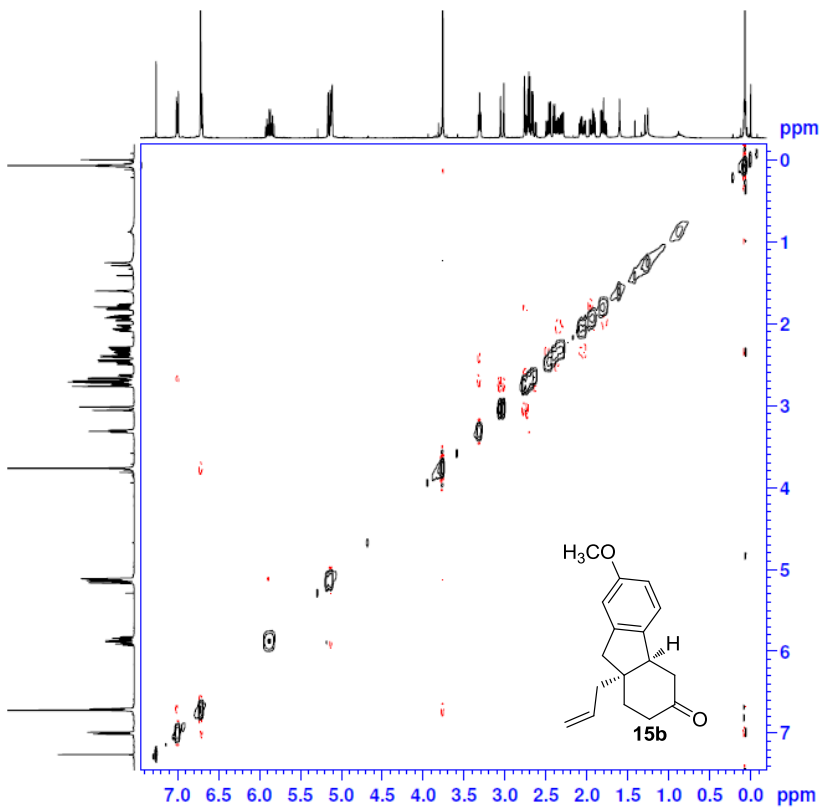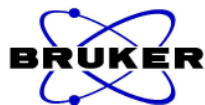

```

NAME      sjb_74_193fp
EXPNO     2
PROCNO    1
Date_     20121029
Time      11.33
INSTRUM   spect
PROBHD    5 mm DUL 13C-1
PULPROG   noesyph
TD         2048
SOLVENT   CDCl3
NS         8
DS         4
SWH        3059.976 Hz
FIDRES     1.494129 Hz
AQ         0.3346932 sec
RG         203
DW         163.400 usec
DE         6.50 usec
TE         301.2 K
D0         0.00015092 sec
D1         2.00000000 sec
D8         0.69999999 sec
IN0        0.00032680 sec
  
```

```

----- CHANNEL f1 -----
NUC1      1H
P1         9.80 usec
PL1        -4.00 dB
PL1W      19.24419975 W
SF01      400.1514624 MHz
NDO       1
TD        128
SF01      400.1515 MHz
FIDRES    23.905924 Hz
SW        7.647 ppm
FMODE     States-TPII
SI        1024
SF        400.1500105 MHz
WDW       QSINE
SSB       2
LB        0.00 Hz
GB        0
PC        1.00
SI        1024
MC2       States-TPII
SF        400.1500105 MHz
WDW       QSINE
SSB       2
LB        0.00 Hz
GB        0
  
```

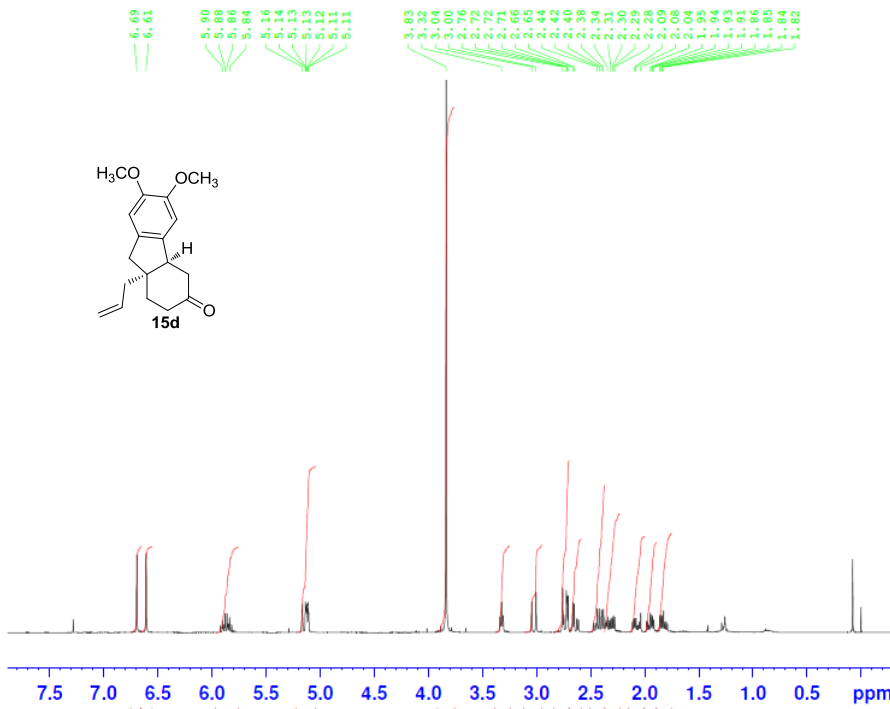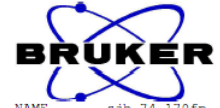

```

NAME      sjb_74_170fp
EXPNO     1
PROCNO    1
Date_     20121012
Time      11.27
INSTRUM   spect
PROBHD    5 mm DUL 13C-1
PULPROG   zg30
TD        65536
SOLVENT   CDCl3
NS        16
DS        2
SWH       8223.685 Hz
FIDRES    0.125483 Hz
AQ        3.9846387 sec
RG        45.2
DW        60.800 usec
DE        6.50 usec
TE        301.2 K
D1        1.00000000 sec
TD0       1
  
```

```

===== CHANNEL f1 =====
NUC1      1H
P1        9.80 usec
PL1       -4.00 dB
PL1W      19.24419975 W
SFO1      400.1524711 MHz
SI        32768
SF        400.1500000 MHz
WDW       EM
SSB       0
LB        0.30 Hz
GB        0
PC        1.00
  
```

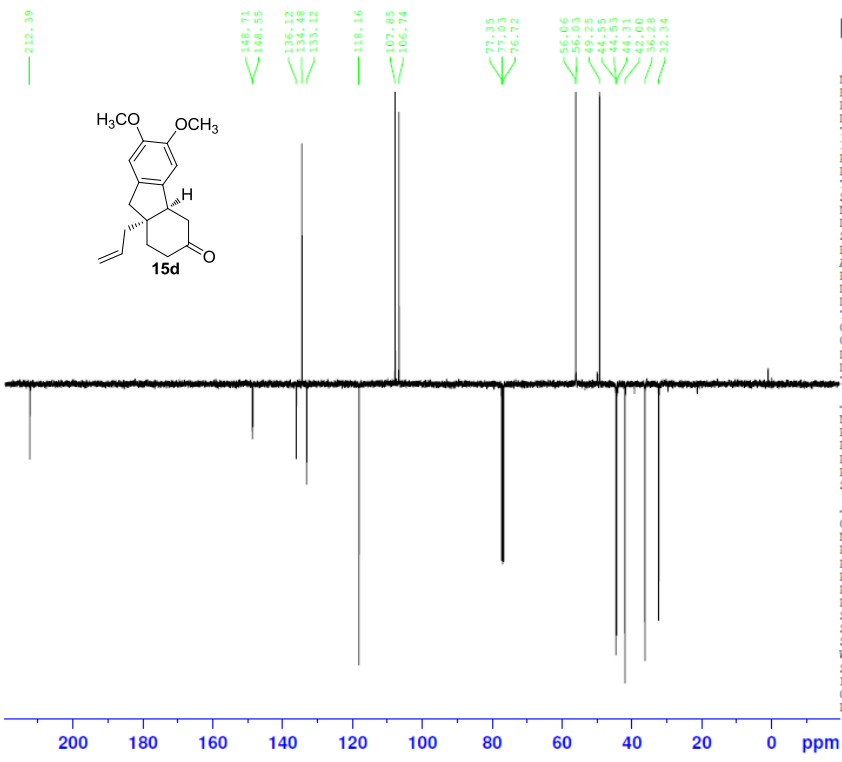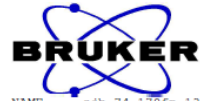

```

NAME      sjb_74_170fp 13CAPT
EXPNO     1
PROCNO    1
Date_     20121017
Time      17.13
INSTRUM   spect
PROBHD    5 mm DUL 13C-1
PULPROG   jmod
TD        65536
SOLVENT   CDCl3
NS        1024
DS        4
SWH       24038.461 Hz
FIDRES    0.366798 Hz
AQ        1.3631988 sec
RG        203
DW        20.800 usec
DE        6.50 usec
TE        301.2 K
CNST2     145.0000000
CNST11    1.0000000
D1        2.00000000 sec
D20       0.00689655 sec
TD0       1
  
```

```

----- CHANNEL f1 -----
NUC1      13C
P1        9.00 usec
P2        18.00 usec
PL1       0.00 dB
PL1W      35.41759872 W
SFO1      100.6278593 MHz

----- CHANNEL f2 -----
CPDPRG2   waltz16
NUC2      1H
PCPD2     80.00 usec
PL2       -3.80 dB
PL12     13.80 dB
PL2W      18.37806702 W
PL12W     0.31937420 W
SFO2      400.1514620 MHz
SI        32768
SF        100.6177980 MHz
WDW       EM
SSB       0
LB        1.00 Hz
GB        0
PC        1.40
  
```

Area Percent Report

Data Path : C:\msdchem\1\DATA\  
Data File : sjb\_74\_170fp.D  
Acq On : 12 Oct 2012 11:58  
Operator : th  
Sample : sjb\_74\_170fp  
Misc :  
ALS Vial : 10 Sample Multiplier: 1

Integration Parameters: autoint1.e  
Integrator: ChemStation

Method : C:\msdchem\1\METHODS\JMB2.m  
Title :

Signal : TIC: sjb\_74\_170fp.D\data.ms

| peak # | R.T. min | first scan | max scan | last scan | PK TY | peak height | corr. area | corr. % max. | % of total |
|--------|----------|------------|----------|-----------|-------|-------------|------------|--------------|------------|
| 1      | 9.520    | 845        | 863      | 903       | BV    | 30303782    | 659142387  | 100.00%      | 97.384%    |
| 2      | 9.769    | 903        | 907      | 921       | VV 6  | 35305       | 957519     | 0.15%        | 0.141%     |
| 3      | 12.858   | 1437       | 1447     | 1475      | VV 3  | 525720      | 16747955   | 2.54%        | 2.474%     |

Sum of corrected areas: 676847861

JMB2.m Wed Oct 17 14:59:13 2012

Abundance

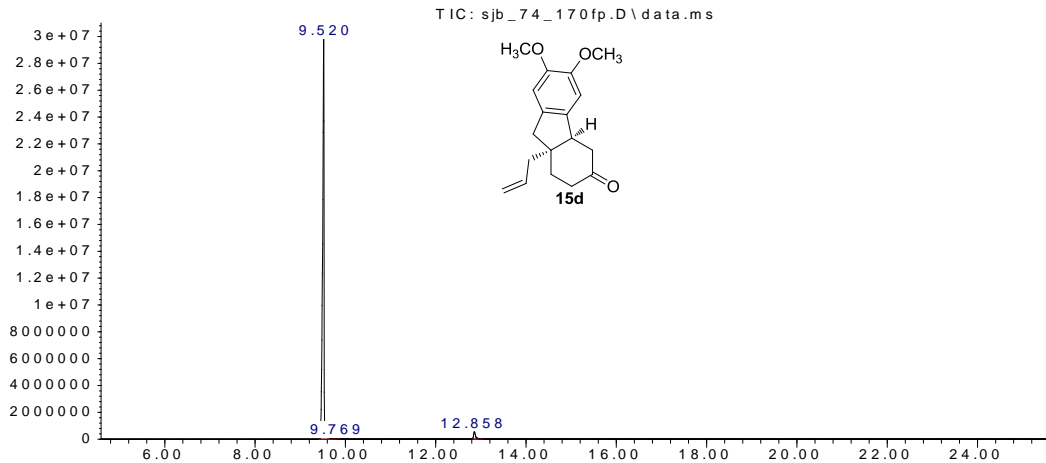

Time-->

Abundance

Scan 858 (9.491 min): sjb\_74\_170fp.D\data.ms

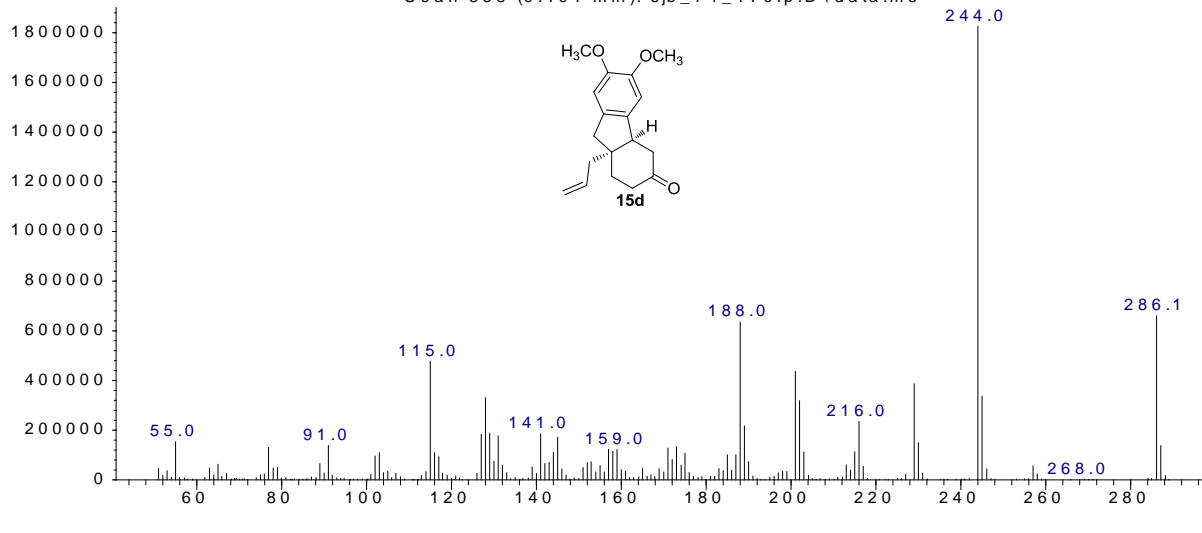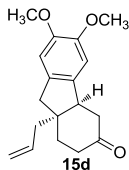

m/z-->

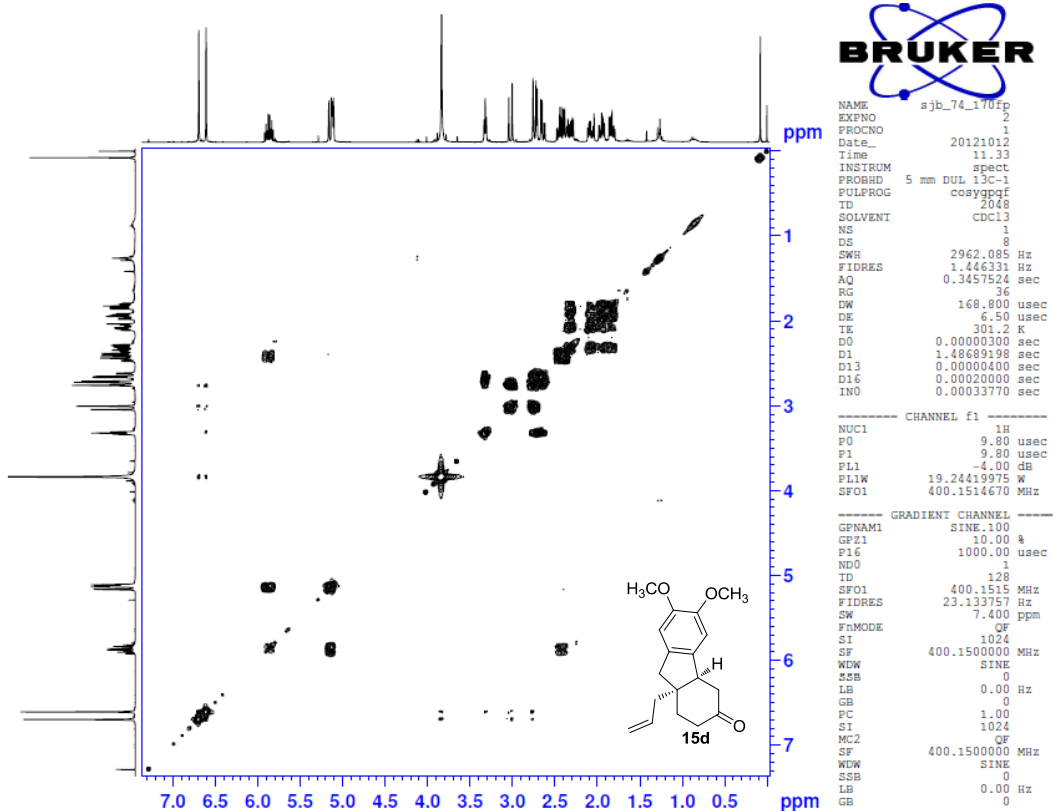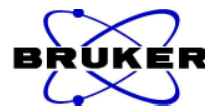

```
NAME sjb_74_170fp
EXPNO 2
PROCNO 1
Date_ 20121012
Time 11.33
INSTRUM spect
PROBHD 5 mm DUL 13C-1
PULPROG cosygpgpf
TD 2048
SOLVENT CDCl3
NS 1
DS 1
SWH 2962.085 Hz
FIDRES 1.446331 Hz
AQ 0.3457524 sec
RG 36
DW 168.800 usec
DE 6.50 usec
TE 301.2 K
D0 0.0000300 sec
D1 1.48689198 sec
D13 0.00000400 sec
D16 0.00020000 sec
IN0 0.00033770 sec

----- CHANNEL f1 -----
NUC1 1H
P0 9.80 usec
P1 9.80 usec
PL1 -4.00 dB
PL1W 19.24419975 W
SFO1 400.1514670 MHz

----- GRADIENT CHANNEL -----
GPNAM1 SINE.100
GPZ1 10.00 %
PlG 1000.00 usec
ND0 1
SFO1 400.1515 MHz
FIDRES 23.133757 Hz
SW 7.400 ppm
FIRMODE QF
SI 1024
SF 400.1500000 MHz
WDW SINE
SSB 0
LB 0.00 Hz
GB 0
PC 1.00
SI 1024
MC2 QF
SF 400.1500000 MHz
WDW SINE
SSB 0
LB 0.00 Hz
GB 0
```

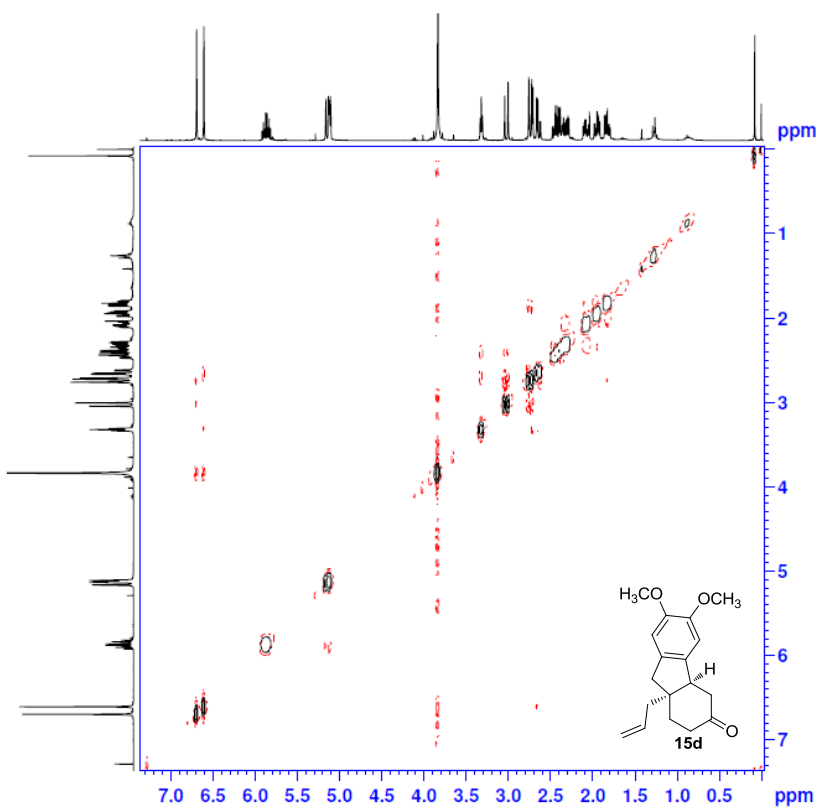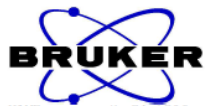

```

NAME      sjb_74_170fp
EXPNO     3
PROCNO    1
Date_     20121012
Time      11.56
INSTRUM   spect
PROBHD    5 mm DUL 13C-1
PULPROG   noesyph
TD         2048
SOLVENT   CDCl3
NS         8
DS         4
SWH        2962.085 Hz
FIDRES     1.446331 Hz
AQ         0.3457524 sec
RG         25.4
DW         168.800 usec
DE         6.50 usec
TE         301.2 K
DO         0.00015638 sec
D1         2.00000000 sec
D8         0.69999999 sec
INO        0.00033770 sec
  
```

```

----- CHANNEL f1 -----
NUC1      1H
P1        9.80 usec
PL1       -4.00 dB
PL1W      19.24419975 W
SFO1      400.1514670 MHz
NDO        1
TD         128
SFO1      400.1515 MHz
FIDRES     23.133757 Hz
SW         7.400 ppm
FnMODE     States-TPPI
SI         1024
SF         400.1500000 MHz
WDW        QSINE
SSB        2
LB         0.00 Hz
GB         0
PC         1.00
SI         1024
MC2        States-TPPI
SF         400.1500000 MHz
WDW        QSINE
SSB        2
LB         0.00 Hz
GB         0
  
```

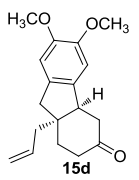



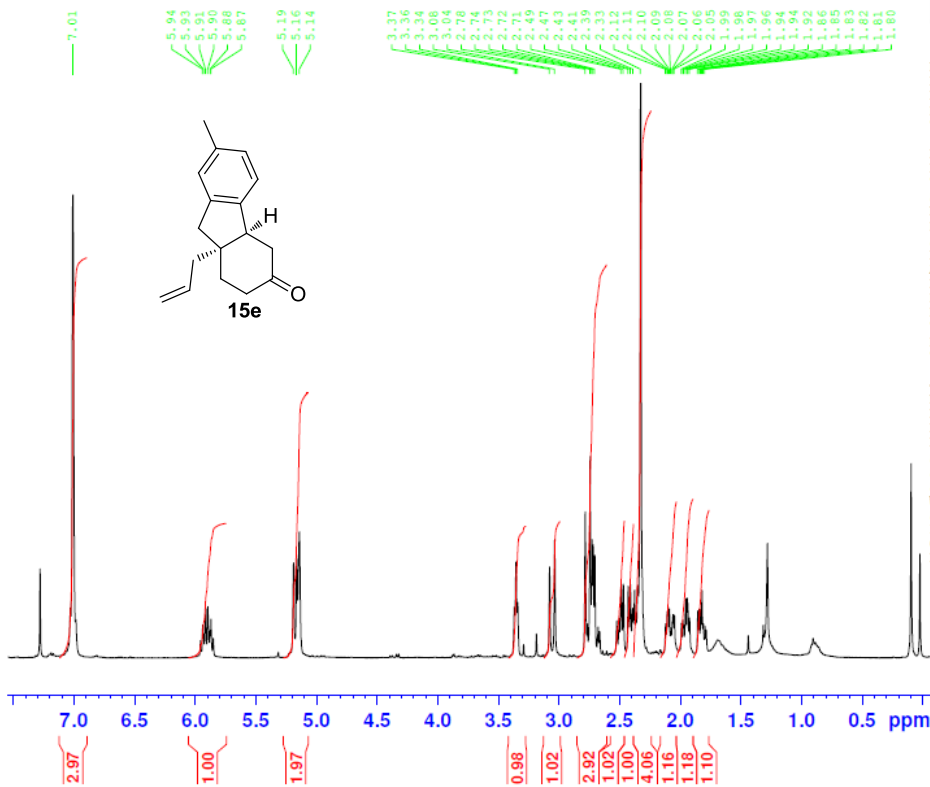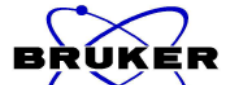

```

NAME      sjb_77_155fp take 2
EXPNO     1
PROCNO    1
Date_     20130730
Time      9.33
INSTRUM   spect
PROBHD    5 mm PABBO BB-
PULPROG   zg30
TD         65536
SOLVENT   CDCl3
NS         16
DS         2
SWH        8223.685 Hz
FIDRES     0.125483 Hz
AQ         3.9846387 sec
RG         144
DW         60.800 usec
DE         6.50 usec
TE         301.2 K
D1         1.0000000 sec
TDO        1
----- CHANNEL f1 -----
NUC1      1H
P1         12.50 usec
PL1        -2.00 dB
PL1W      12.14226913 W
SFO1       400.1524711 MHz
SI         32768
SF         400.1500000 MHz
WDW        EM
SSB         0
LB          0.30 Hz
GB          0
PC          1.00
  
```

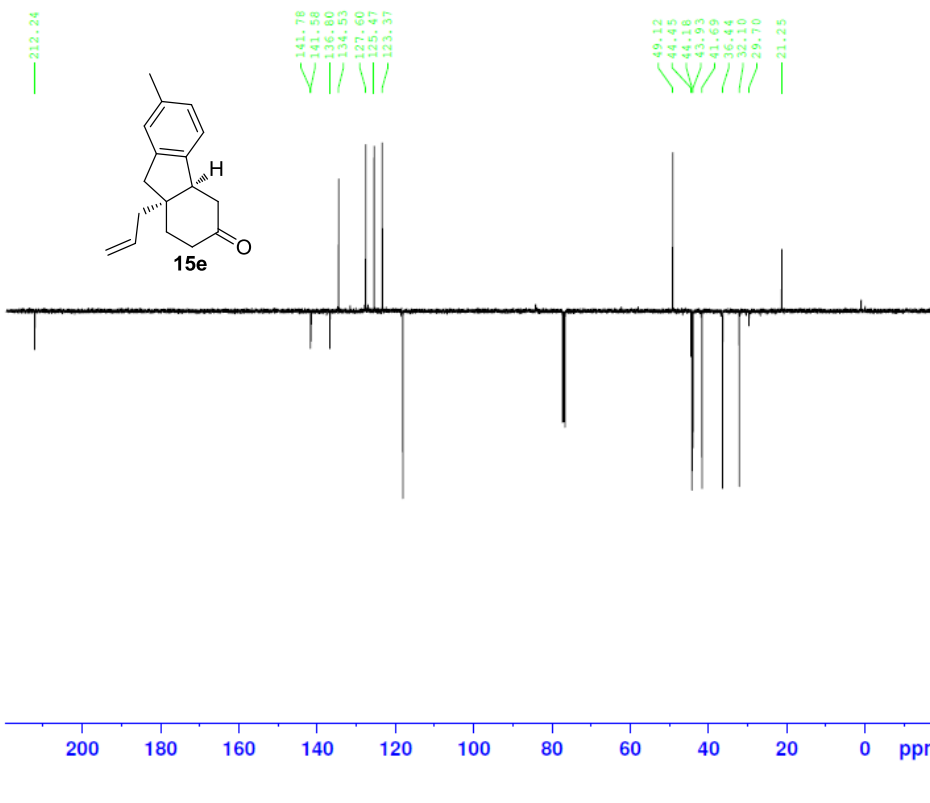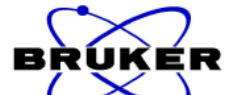

```

NAME      sjb_77_155fp APT
EXPNO     1
PROCNO    1
Date_     20130730
Time      10.38
INSTRUM   spect
PROBHD    5 mm PABBO BB-
PULPROG   jmod
TD         65536
SOLVENT   CDCl3
NS         1024
DS         4
SWH        24038.461 Hz
FIDRES     0.366798 Hz
AQ         1.3631988 sec
RG         203
DW         20.800 usec
DE         6.50 usec
TE         301.2 K
CNST2     145.0000000
CNST11    1.0000000
D1         2.0000000 sec
D20        0.00689655 sec
TDO        1
----- CHANNEL f1 -----
NUC1      13C
P1         8.00 usec
P2         16.00 usec
PL1        -2.00 dB
PL1W      56.13311005 W
SFO1       100.6278593 MHz
----- CHANNEL f2 -----
CPDPRG2   waltz16
NUC2      1H
PCPD2     80.00 usec
PL2        -2.00 dB
PL12      14.00 dB
PL2W      12.14226913 W
PL12W     0.30500001 W
SFO2       400.1514963 MHz
SI         32768
SF         100.6177980 MHz
WDW        EM
SSB         0
LB          1.00 Hz
GB          0
PC          1.40
  
```

Area Percent Report

Data Path : C:\msdchem\1\DATA\  
Data File : sjb\_77\_155fp.D  
Acq On : 17 Jul 2013 19:26  
Operator : JMB  
Sample : sjb\_77\_155fp  
Misc :  
ALS Vial : 70 Sample Multiplier: 1

Integration Parameters: autoint1.e  
Integrator: ChemStation

Method : C:\msdchem\1\5973N\PRECISION.M  
Title :

Signal : TIC: sjb\_77\_155fp.D\data.ms

| peak # | R.T. min | first scan | max scan | last scan | PK TY | peak height | corr. area | corr. % max. | % of total |
|--------|----------|------------|----------|-----------|-------|-------------|------------|--------------|------------|
| 1      | 7.438    | 485        | 499      | 557       | PV    | 17547844    | 273377835  | 100.00%      | 99.173%    |
| 2      | 12.685   | 1406       | 1416     | 1423      | BV 3  | 71876       | 1506033    | 0.55%        | 0.546%     |
| 3      | 12.746   | 1423       | 1427     | 1438      | VV 6  | 38668       | 772660     | 0.28%        | 0.280%     |

Sum of corrected areas: 275656527

Abundance

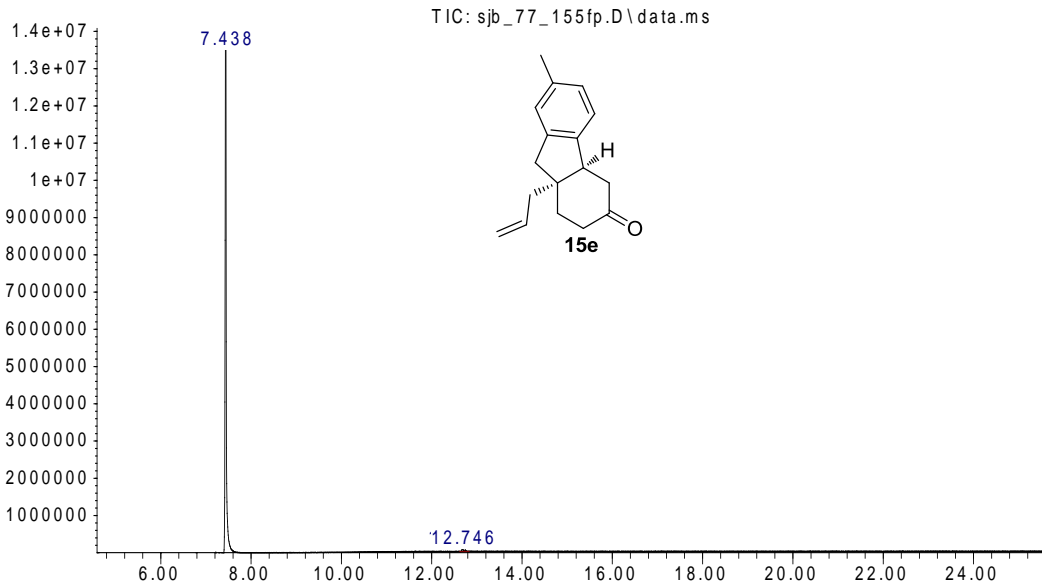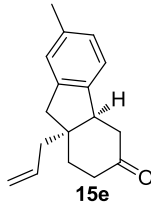

Time-->

Abundance

Scan 504 (7.465 min): sjb\_77\_155fp.D\data.ms

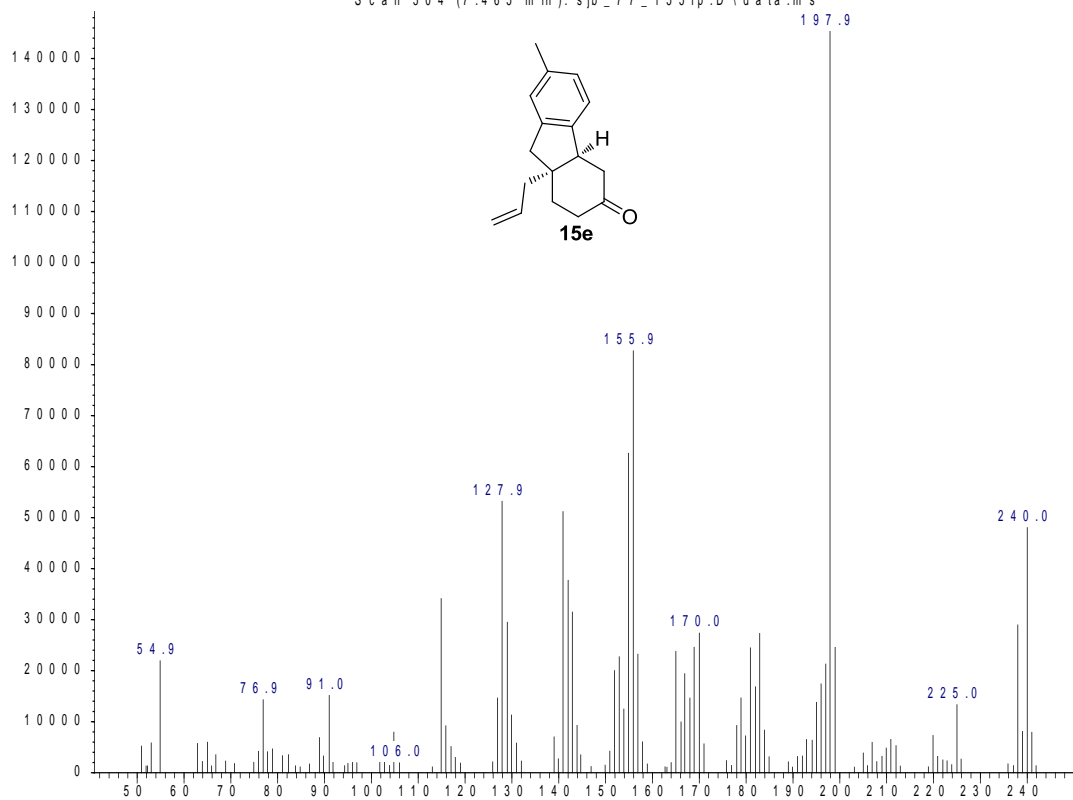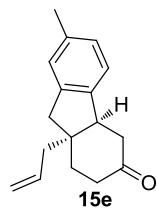

m/z-->

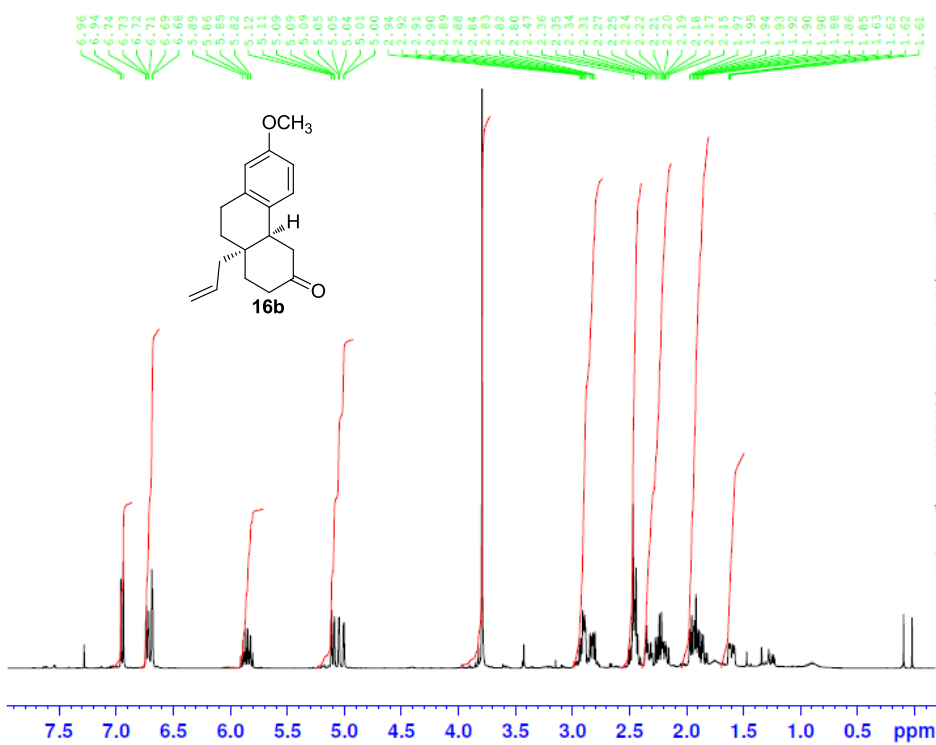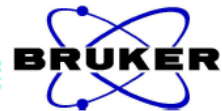

```

NAME      sjb_77_098fp take 2
EXPNO    1
PROCNO   1
Date_    20130805
Time     11.07
INSTRUM  spect
PROBHD   5 mm PABBO BB-
PULPROG  zg30
TD       65536
SOLVENT  CDCl3
NS       16
DS       2
SWH      8223.685 Hz
FIDRES   0.125483 Hz
AQ       3.9846387 sec
RG       50.8
DW       60.800 usec
DE       6.50 usec
TE       301.2 K
D1       1.0000000 sec
TDO      1
  
```

```

----- CHANNEL f1 -----
NUC1     1H
P1       12.50 usec
PL1      -2.00 dB
PL1W    12.14226913 W
SFO1    400.1524711 MHz
SI       32768
SF       400.1500000 MHz
WDW      EM
SSB      0
LB       0.30 Hz
GB       0
PC       1.00
  
```

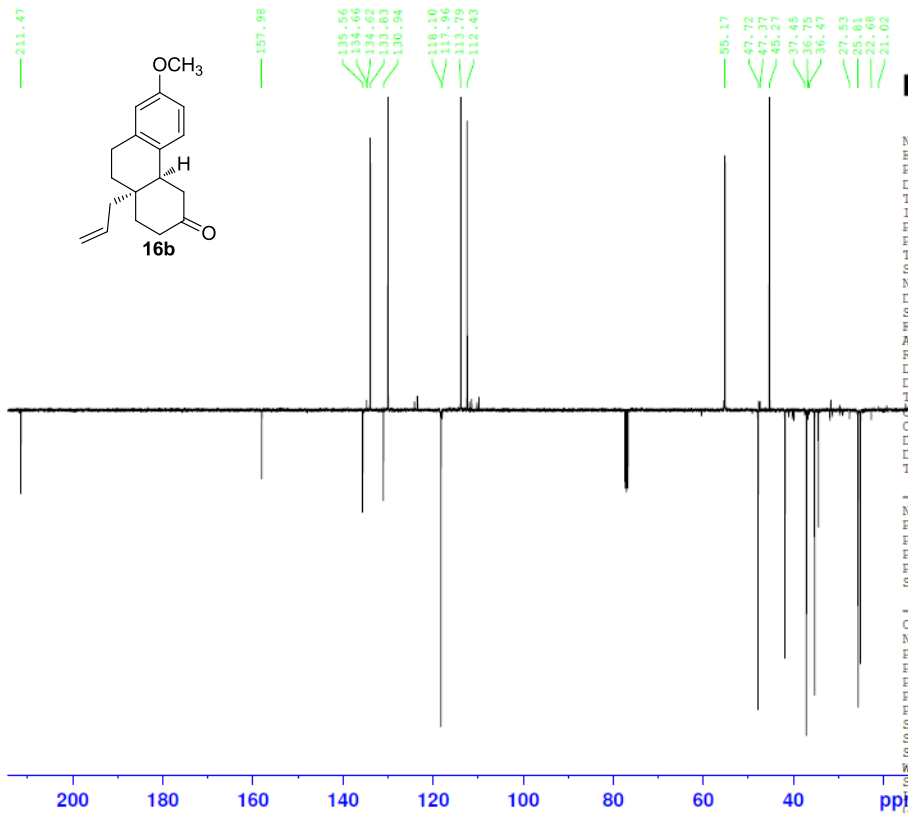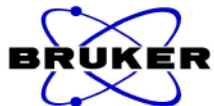

```

NAME      sjb_77_098fp APT
EXPNO    1
PROCNO   1
Date_    20130605
Time     9.21
INSTRUM  spect
PROBHD   5 mm PABBO BB-
PULPROG  jmod
TD       65536
SOLVENT  CDCl3
NS       1024
DS       4
SWH      24038.461 Hz
FIDRES   0.366798 Hz
AQ       1.3631988 sec
RG       203
DW       20.800 usec
DE       6.50 usec
TE       301.2 K
D1       145.0000000 sec
D2       2.0000000 sec
D20      0.00689655 sec
TDO      1
  
```

```

----- CHANNEL f1 -----
NUC1     13C
P1       8.00 usec
P2       16.00 usec
PL1      -2.00 dB
PL1W    56.13311005 W
SFO1    100.6278593 MHz
  
```

```

----- CHANNEL f2 -----
CPDPRG2  waltz16
NUC2     1H
PCPD2    80.00 usec
PL2      -2.00 dB
PL12     14.00 dB
PL2W    12.14226913 W
PL12W   0.30500001 W
SFO2    400.1515253 MHz
SI       32768
SF       100.6177980 MHz
WDW      EM
SSB      0
LB       1.00 Hz
GB       0
PC       1.40
  
```

Area Percent Report

Data Path : C:\msdchem\1\DATA\  
Data File : sjb\_74\_055fp.D  
Acq On : 5 Jul 2012 11:31  
Operator : sjb  
Sample : sjb\_74\_055fp  
Misc :  
ALS Vial : 100 Sample Multiplier: 1

Integration Parameters: autoint1.e  
Integrator: ChemStation

Method : C:\msdchem\1\METHODS\JMB2.m  
Title :

Signal : TIC: sjb\_74\_055fp.D\data.ms

| peak # | R.T. min | first scan | max scan | last scan | PK TY | peak height | corr. area | corr. % max. | % of total |
|--------|----------|------------|----------|-----------|-------|-------------|------------|--------------|------------|
| 1      | 8.844    | 737        | 745      | 759       | BB    | 519105      | 7434595    | 3.19%        | 3.034%     |
| 2      | 9.079    | 779        | 786      | 796       | BV    | 347741      | 4764015    | 2.05%        | 1.944%     |
| 3      | 9.434    | 833        | 848      | 892       | BV    | 11665755    | 232806835  | 100.00%      | 95.021%    |

Sum of corrected areas: 245005445

JMB2.m Mon Nov 12 10:09:42 2012

Abundance

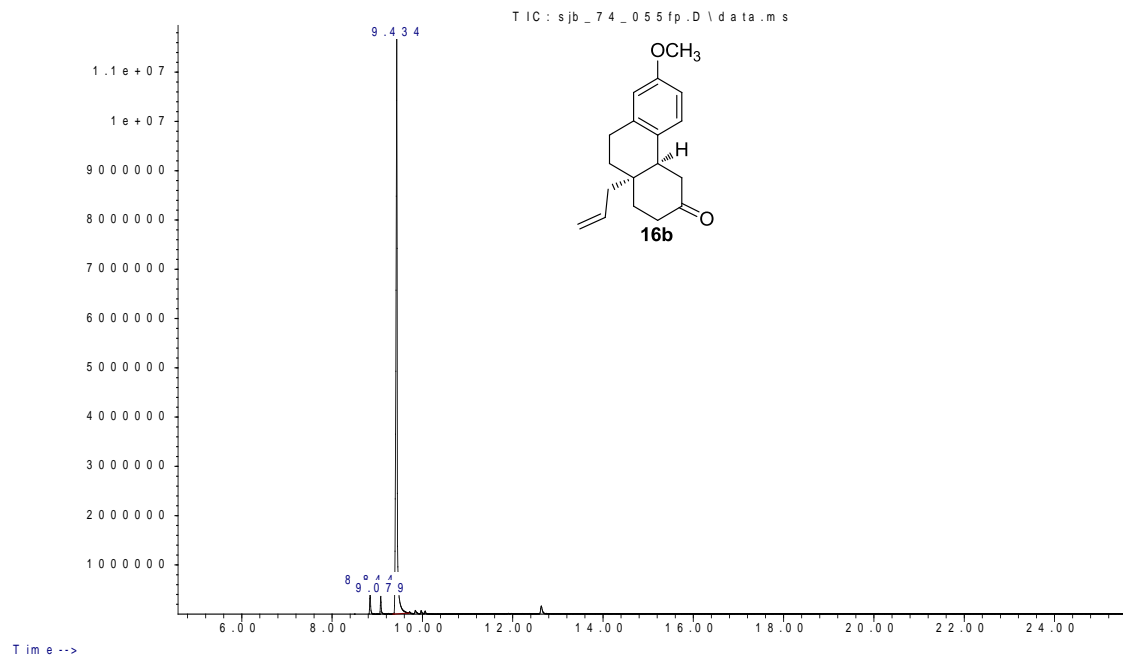

Abundance

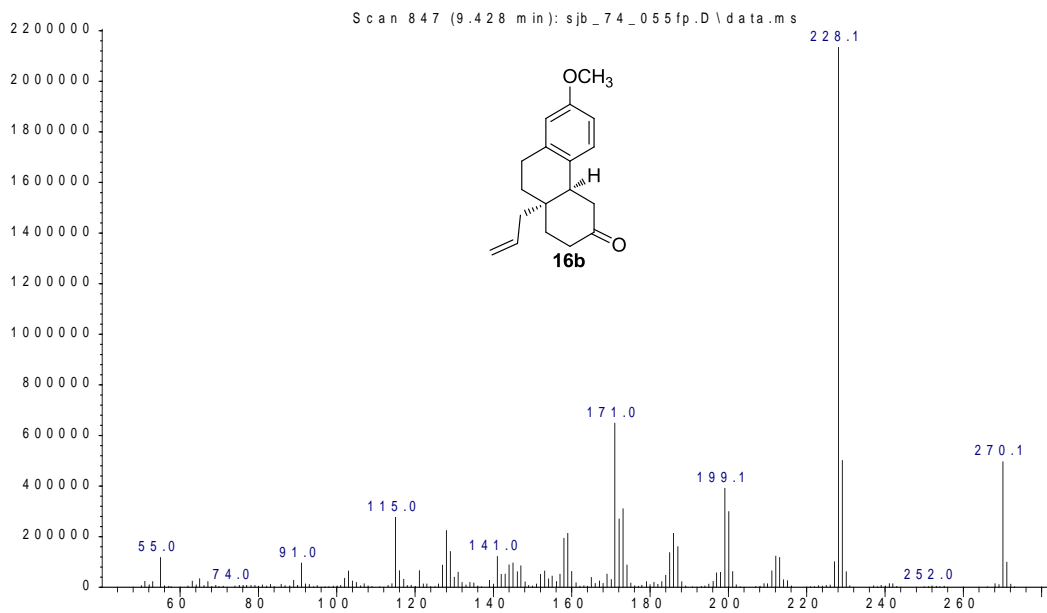

m/z-->

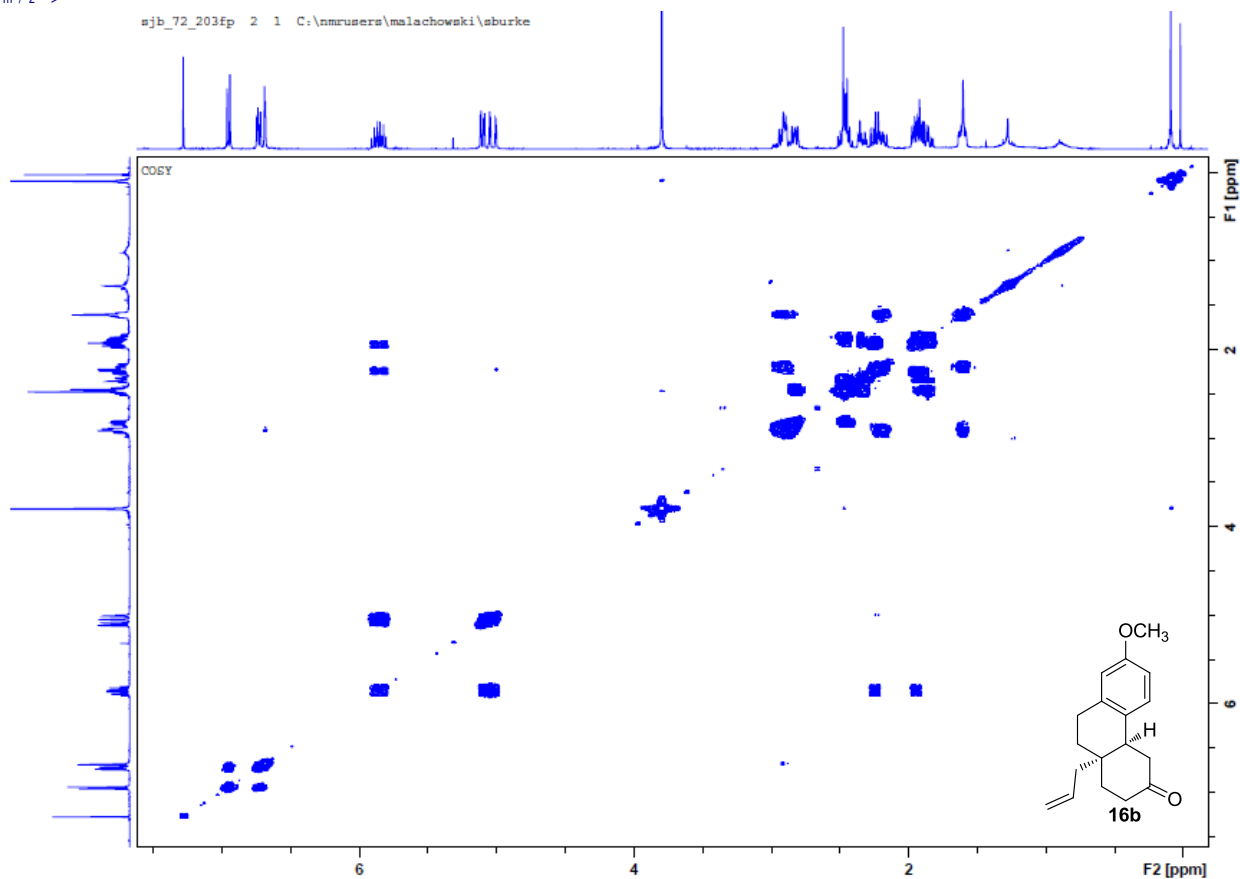

sjb\_72\_203fp 4 1 C:\nmrusers\malachowski\aburke

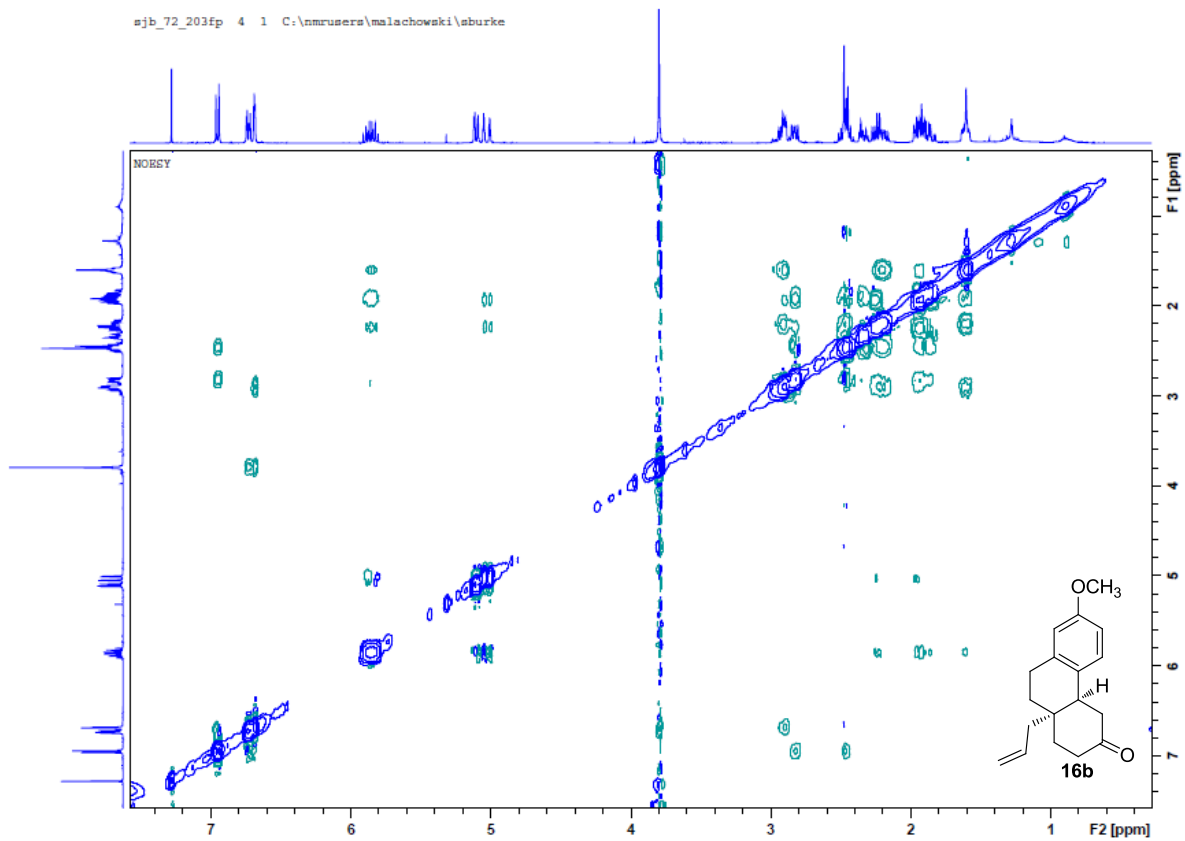

sjb\_72\_203fp 4 1 C:\nmrusers\malachowski\aburke

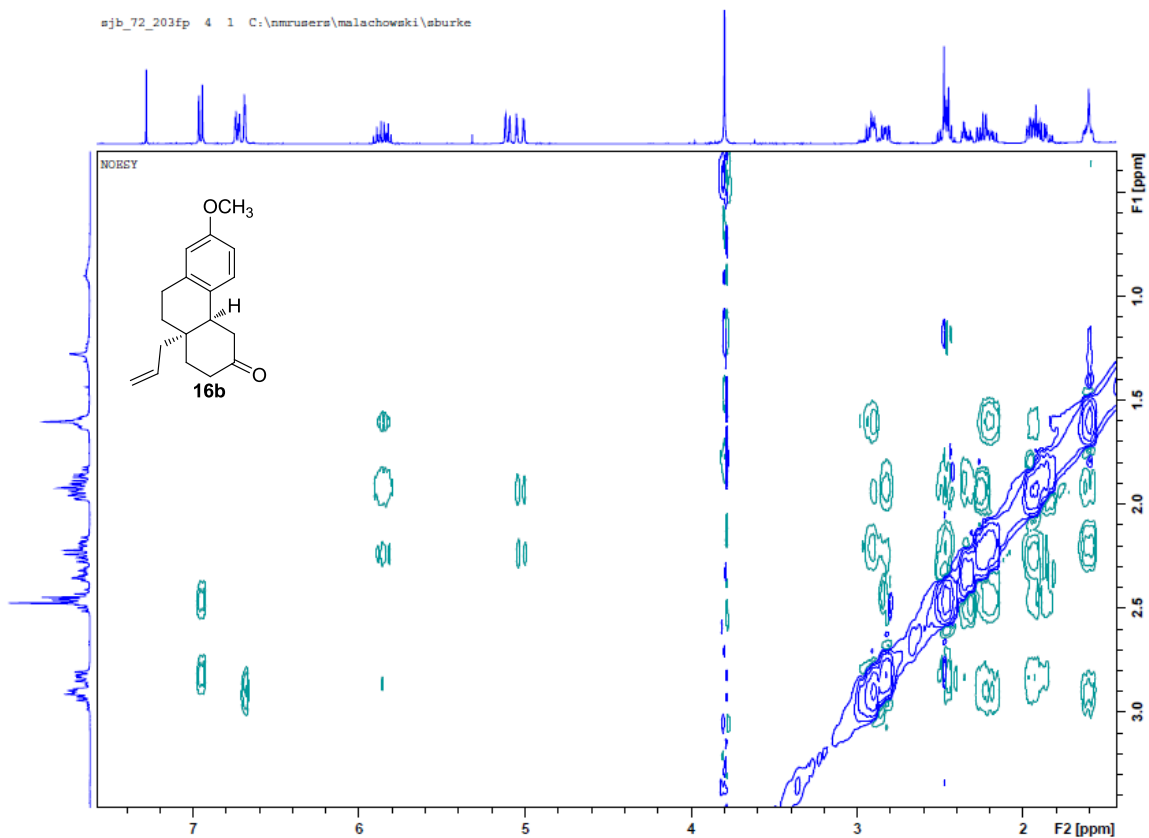

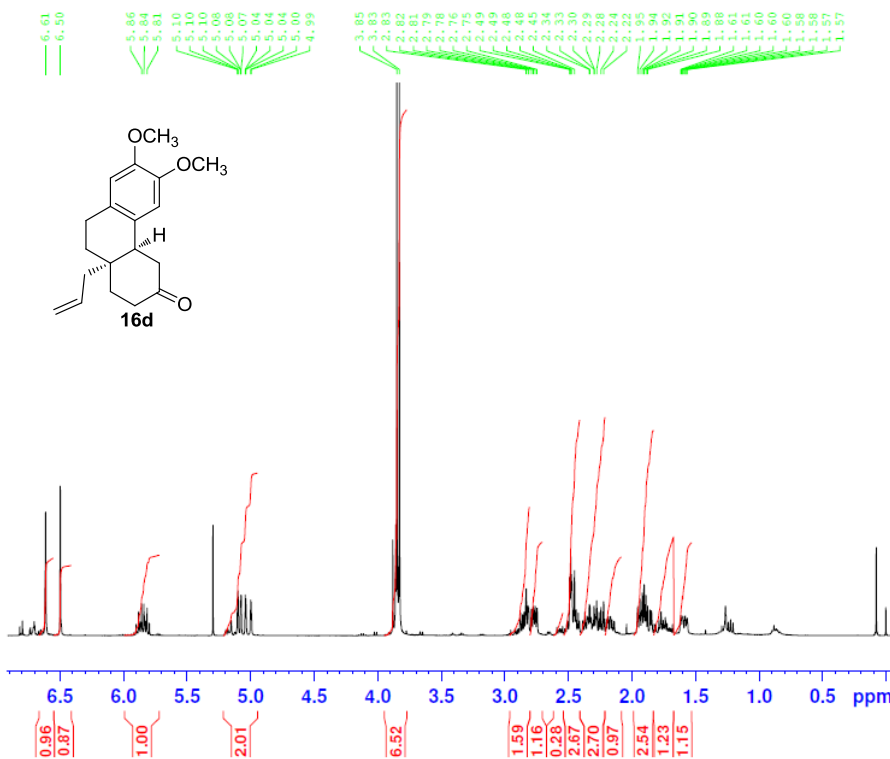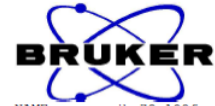

```

NAME      sjb_72_198fp
EXPNO    1
PROCNO   1
Date_    20120503
Time     11.39
INSTRUM  spect
PROBHD   5 mm PABBO BB-
PULPROG  zg30
TD       65536
SOLVENT  CDCl3
NS       16
DS       2
SWH      8223.685 Hz
FIDRES   0.125483 Hz
AQ       3.9846387 sec
RG       40.3
DW       60.800 usec
DE       6.50 usec
TE       301.2 K
D1       1.00000000 sec
TDO     1
  
```

```

===== CHANNEL f1 =====
NUC1     1H
P1       12.50 usec
PL1     -2.00 dB
PL1W    12.14226913 W
SFO1    400.1524711 MHz
SI       32768
SF      400.1500000 MHz
WDW      EM
SSB      0
LB       0.30 Hz
GB       0
PC       1.00
  
```

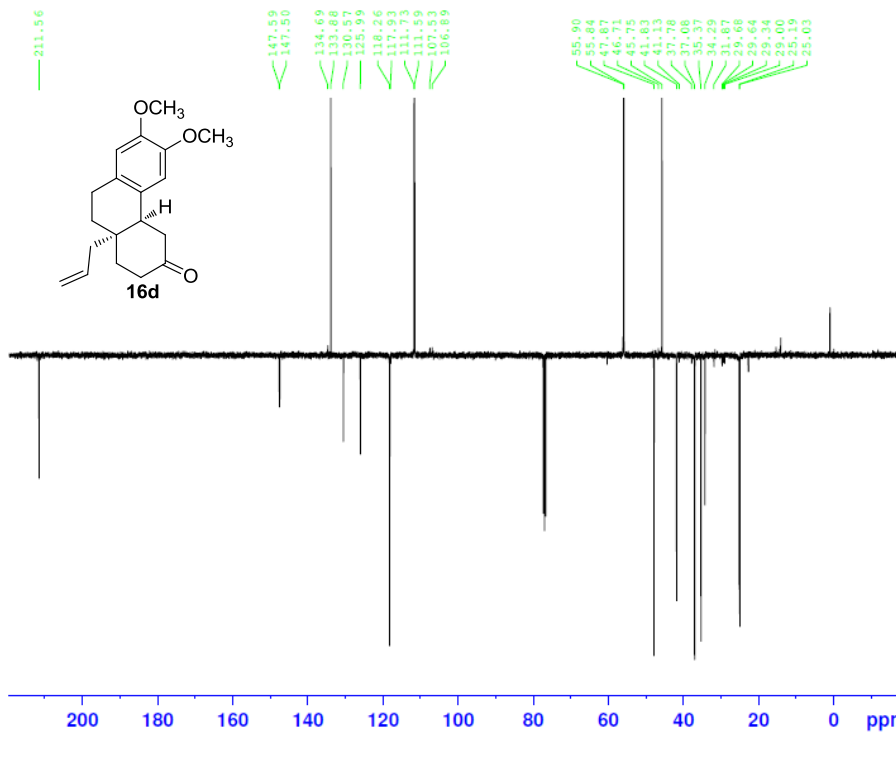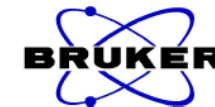

```

NAME      sjb_77_005fp APT
EXPNO    1
PROCNO   1
Date_    20121210
Time     9.30
INSTRUM  spect
PROBHD   5 mm PABBO BB-
PULPROG  jmod
TD       65536
SOLVENT  CDCl3
NS       1024
DS       4
SWH      24038.461 Hz
FIDRES   0.366798 Hz
AQ       1.3631988 sec
RG       203
DW       20.800 usec
DE       6.50 usec
TE       301.2 K
CNST2   145.0000000
CNST11  1.0000000
D1       2.00000000 sec
D20     0.00689655 sec
TDO     1
  
```

```

===== CHANNEL f1 =====
NUC1     13C
P1       8.00 usec
P2       16.00 usec
PL1     -2.00 dB
PL1W    56.13311005 W
SFO1    100.6278593 MHz

===== CHANNEL f2 =====
CPDPRG2  waltz16
NUC2     1H
PCPD2   80.00 usec
PL2     -2.00 dB
PL12    14.00 dB
PL2W    12.14226913 W
PL12W   0.30500001 W
SFO2    400.1514495 MHz
SI       32768
SF      100.6177980 MHz
WDW      EM
SSB      0
LB       1.00 Hz
GB       0
PC       1.40
  
```



Area Percent Report

Data Path : C:\msdchem\1\DATA\  
 Data File : sjb\_72\_198fp.D  
 Acq On : 3 May 2012 11:59  
 Operator : sjb  
 Sample : sjb\_72\_198fp  
 Misc :  
 ALS Vial : 55 Sample Multiplier: 1

Integration Parameters: autoint1.e  
 Integrator: ChemStation

Method : C:\msdchem\1\METHODS\JMB2.m  
 Title :

Signal : TIC: sjb\_72\_198fp.D\data.ms

| peak # | R.T. min | first scan | max scan | last scan | PK TY | peak height | corr. area | corr. % max. | % of total |
|--------|----------|------------|----------|-----------|-------|-------------|------------|--------------|------------|
| 1      | 9.415    | 838        | 845      | 854       | PV 3  | 35843       | 523833     | 0.06%        | 0.060%     |
| 2      | 9.771    | 888        | 907      | 926       | PV    | 639609      | 9434624    | 1.12%        | 1.081%     |
| 3      | 9.958    | 926        | 940      | 964       | VV 3  | 682972      | 12270772   | 1.45%        | 1.406%     |
| 4      | 10.386   | 999        | 1015     | 1076      | PV    | 37735401    | 845131612  | 100.00%      | 96.870%    |
| 5      | 10.748   | 1076       | 1078     | 1083      | VV 5  | 44991       | 946871     | 0.11%        | 0.109%     |
| 6      | 10.788   | 1083       | 1085     | 1090      | VV 5  | 27602       | 321745     | 0.04%        | 0.037%     |
| 7      | 14.044   | 1628       | 1654     | 1680      | VV 5  | 82632       | 3807415    | 0.45%        | 0.436%     |

Sum of corrected areas: 872436873

JMB2.m Thu Nov 08 10:05:52 2012

Abundance

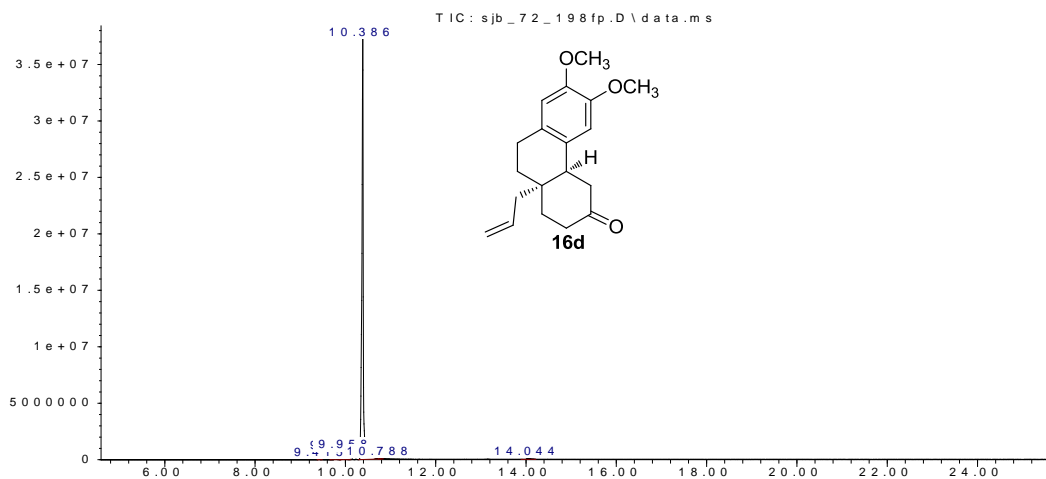

Abundance

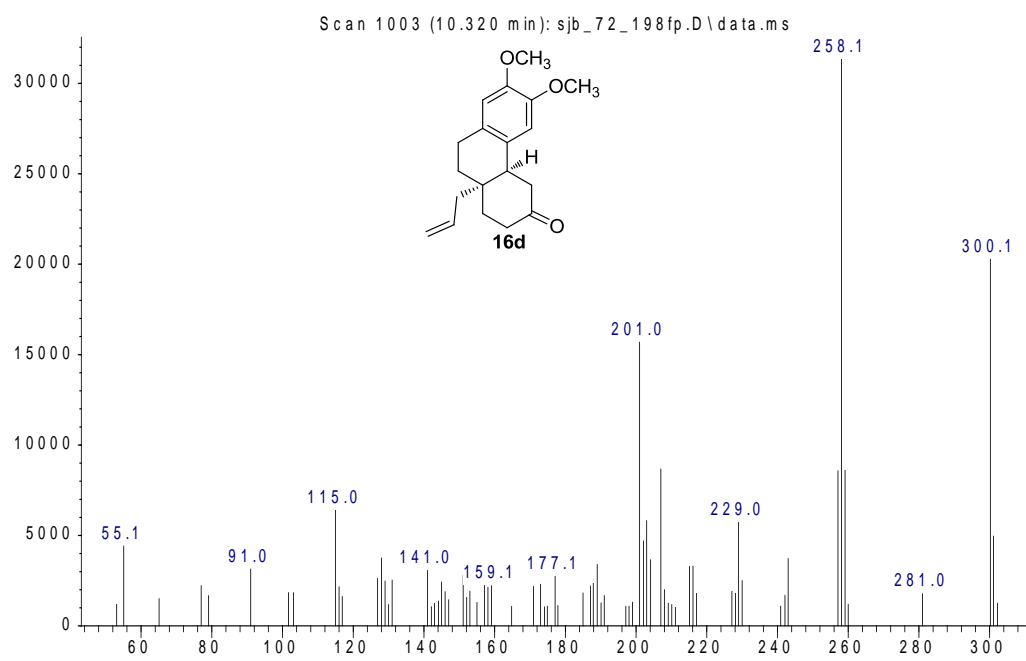

m/z-->

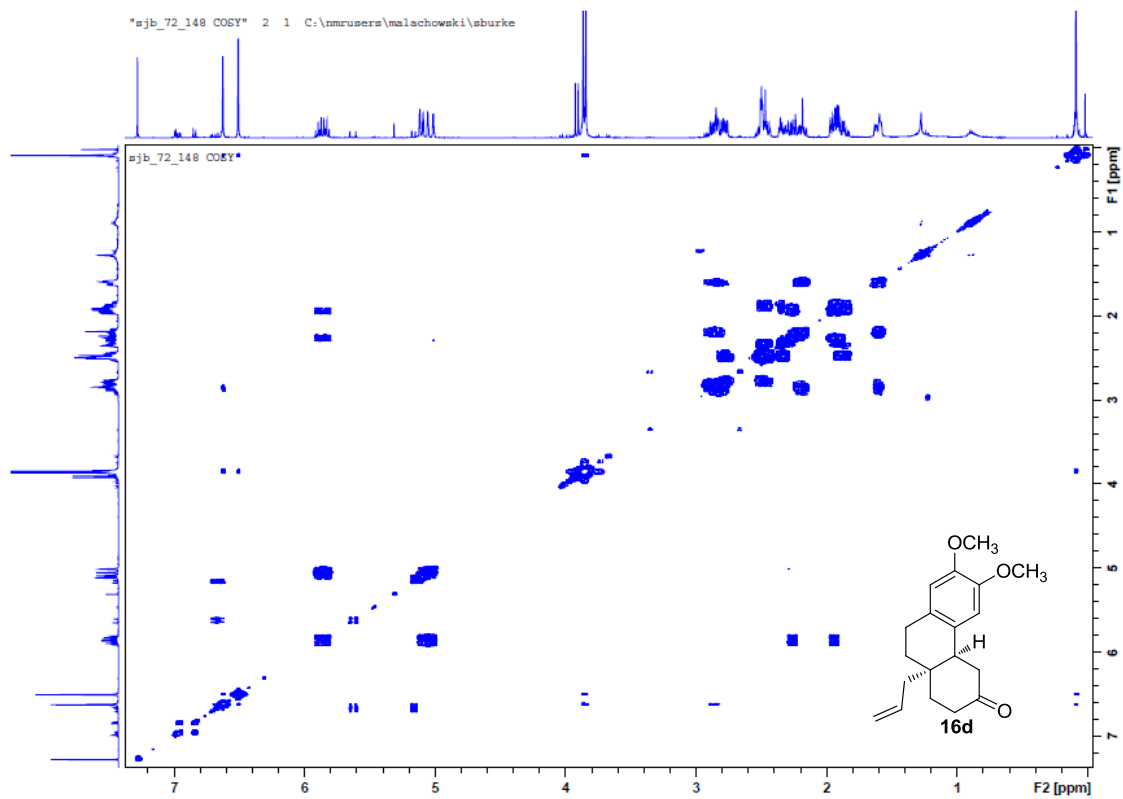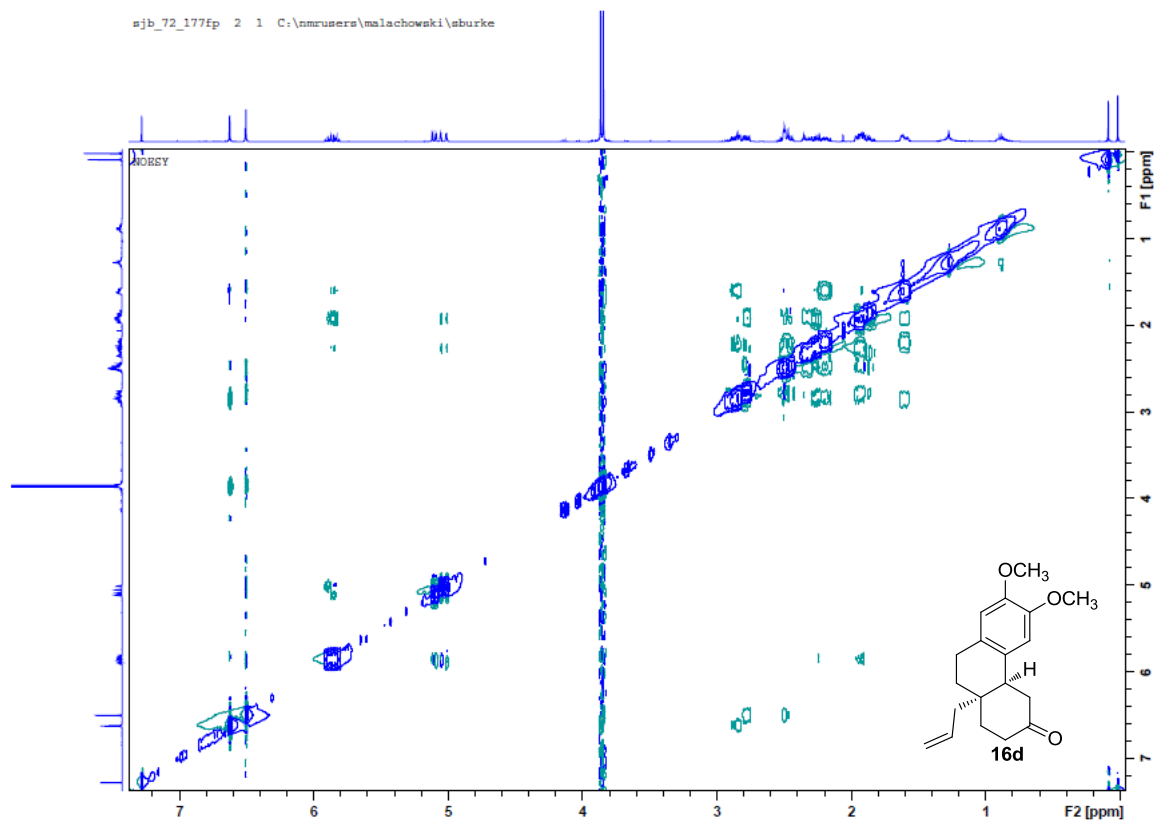

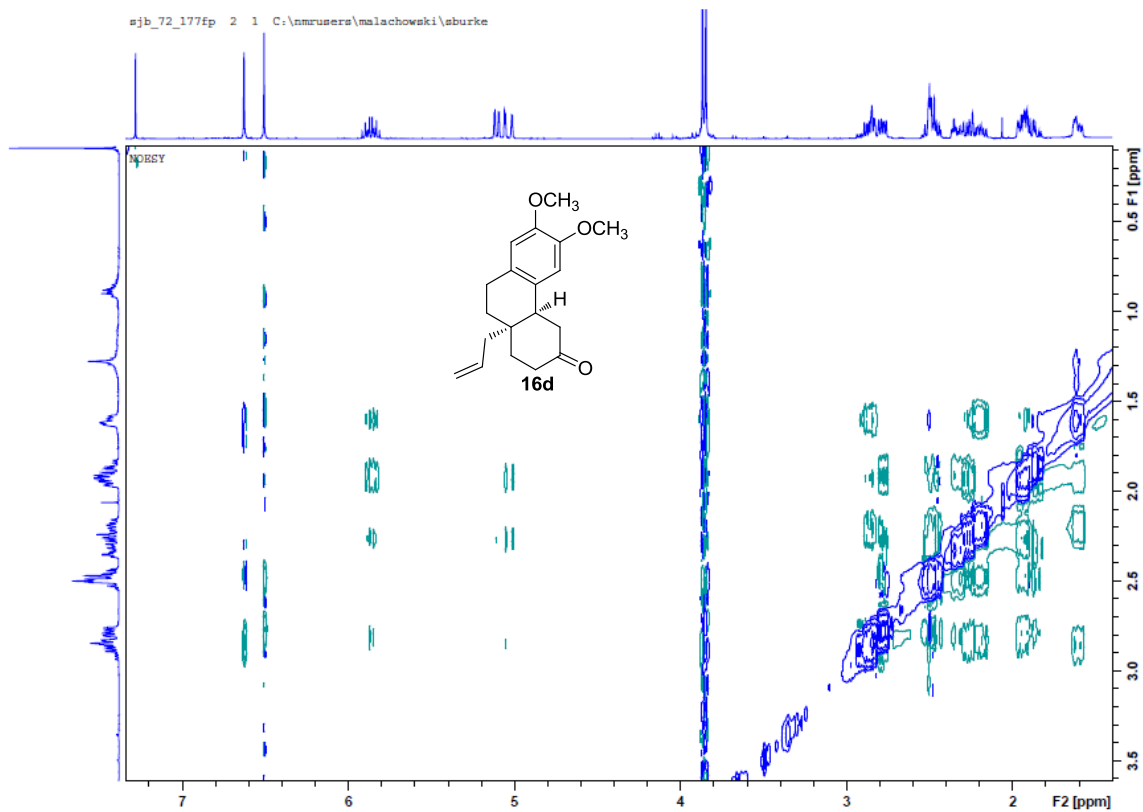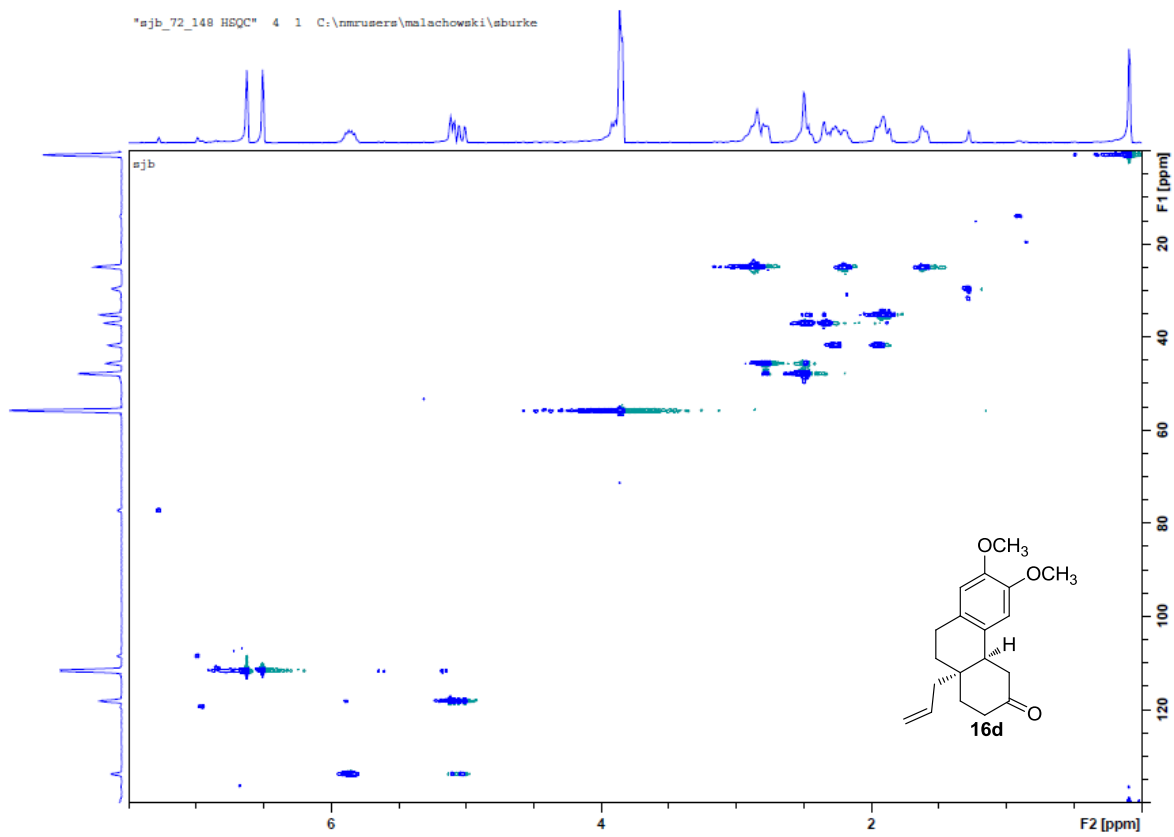

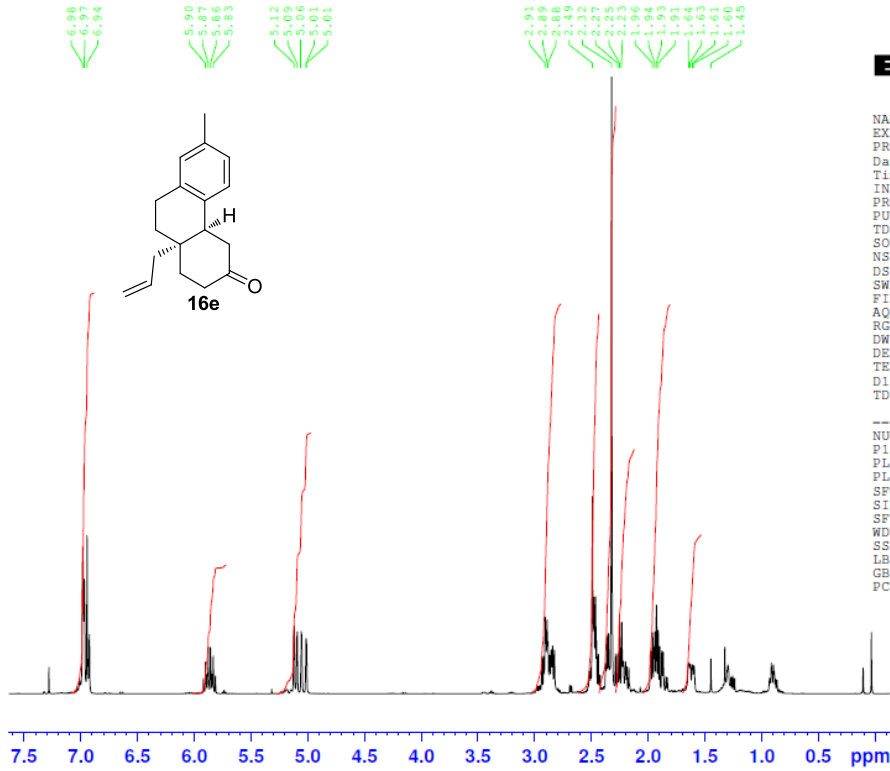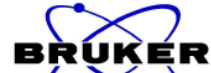

```

NAME      sjb_77_045 fr10
EXPNO     1
PROCNO    1
Date_     20130125
Time      14.10
INSTRUM   spect
PROBHD    5 mm PABBO BB-
PULPROG   zg30
TD         65536
SOLVENT   CDCl3
NS         16
DS         2
SWH        8223.695 Hz
FIDRES     0.125483 Hz
AQ         3.9846387 sec
RG         50.8
DW         60.800 usec
DE         6.50 usec
TE         304.9 K
D1         1.00000000 sec
TDO        1
  
```

```

----- CHANNEL f1 -----
NUC1      1H
P1         12.50 usec
PL1        -2.00 dB
PL1W      12.14226913 W
SFO1      400.1524711 MHz
SI         32768
SF         400.1500000 MHz
WDW        EM
SSB        0
LB         0.30 Hz
GB         0
PC         1.00
  
```

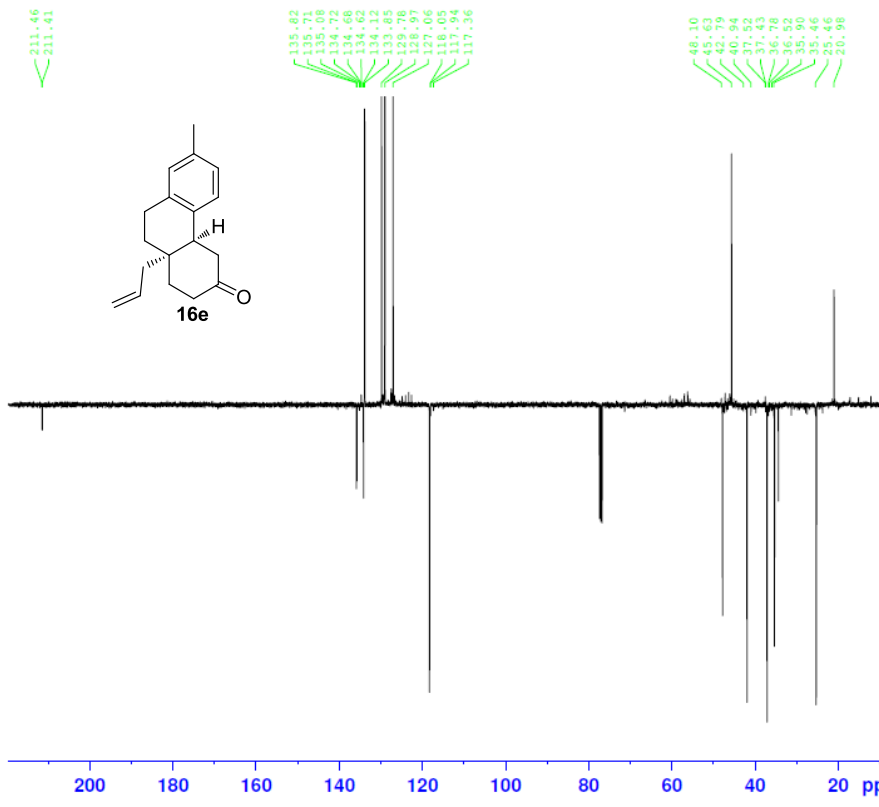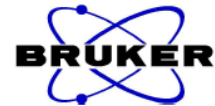

```

NAME      sjb_77_035APT
EXPNO     1
PROCNO    1
Date_     20130118
Time      13.23
INSTRUM   spect
PROBHD    5 mm PABBO BB-
PULPROG   jmod
TD         65536
SOLVENT   CDCl3
NS         1024
DS         4
SWH        24038.461 Hz
FIDRES     0.366798 Hz
AQ         1.3631988 sec
RG         203
DW         20.800 usec
DE         6.50 usec
TE         304.6 K
SFO2      145.0000000 MHz
CNST11    1.0000000
D1         2.00000000 sec
D20        0.00689655 sec
TDO        1
  
```

```

----- CHANNEL f1 -----
NUC1      13C
P1         8.00 usec
P2         16.00 usec
PL1        -2.00 dB
PL1W      56.13311005 W
SFO1      100.6278593 MHz

----- CHANNEL f2 -----
CPDPRG2   waltz16
NUC2      1H
PCPD2     80.00 usec
PL2        -2.00 dB
PL12      14.00 dB
PL2W      12.14226913 W
PL12W     0.30500001 W
SFO2      400.1514921 MHz
SI         32768
SF         100.6177980 MHz
WDW        EM
SSB        0
GB         1.00 Hz
PC         1.40
  
```

Area Percent Report

Data Path : C:\msdchem\1\DATA\  
Data File : sjb\_77\_035fp.D  
Acq On : 17 Jan 2013 9:18  
Operator : sjb  
Sample : sjb\_77\_035fp  
Misc :  
ALS Vial : 15 Sample Multiplier: 1

Integration Parameters: autoint1.e  
Integrator: ChemStation

Method : C:\msdchem\1\5973N\PRECISION.M  
Title :

Signal : TIC: sjb\_77\_035fp.D\data.ms

| peak # | R.T. min | first scan | max scan | last scan | PK TY | peak height | corr. area | corr. % max. | % of total |
|--------|----------|------------|----------|-----------|-------|-------------|------------|--------------|------------|
| 1      | 7.859    | 567        | 573      | 586       | BV    | 921047      | 12330088   | 2.82%        | 2.645%     |
| 2      | 8.115    | 602        | 618      | 630       | BV 2  | 742118      | 9405778    | 2.15%        | 2.017%     |
| 3      | 8.452    | 662        | 677      | 691       | VV    | 22818856    | 436485499  | 100.00%      | 93.619%    |
| 4      | 11.442   | 1191       | 1199     | 1218      | PV 3  | 413116      | 8016772    | 1.84%        | 1.719%     |

Sum of corrected areas: 466238136

Abundance

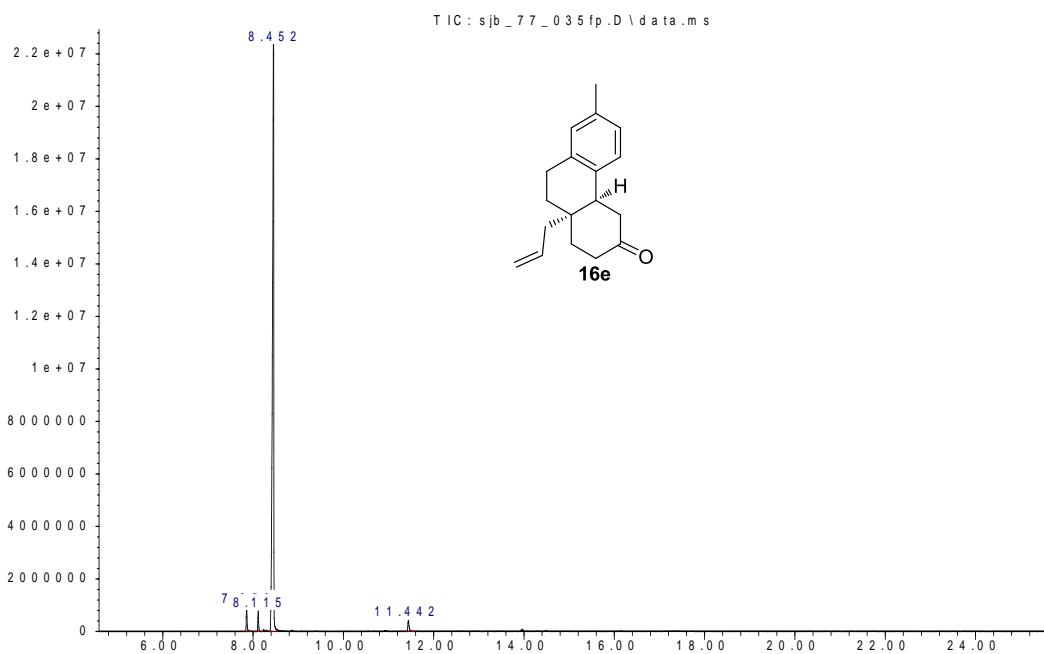

Time -->

Abundance

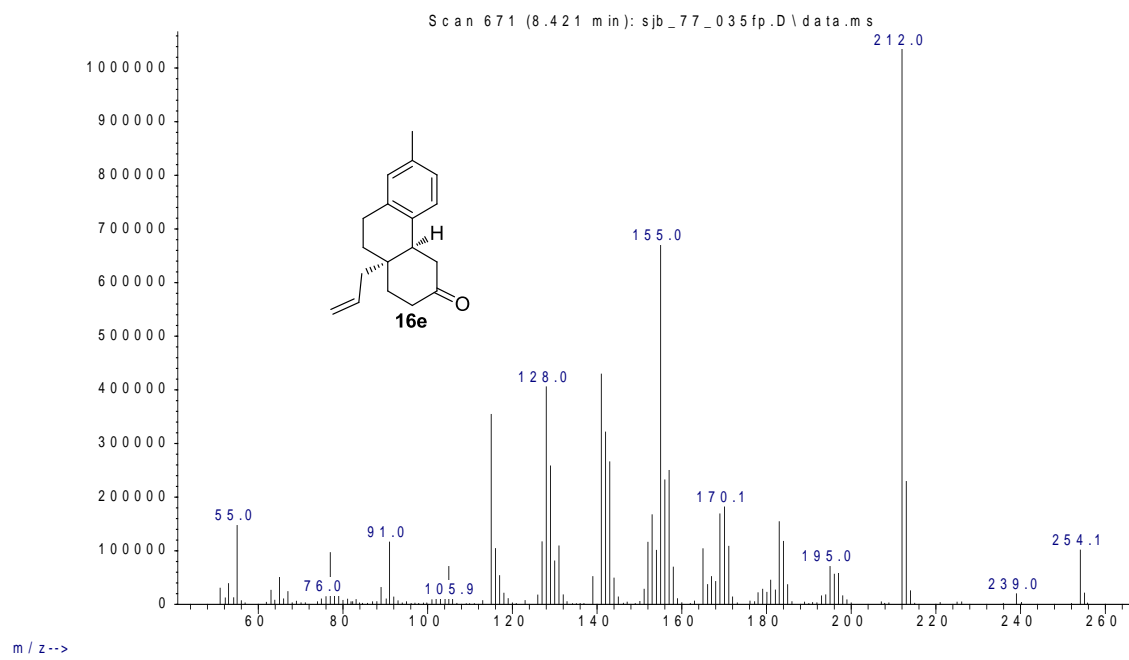

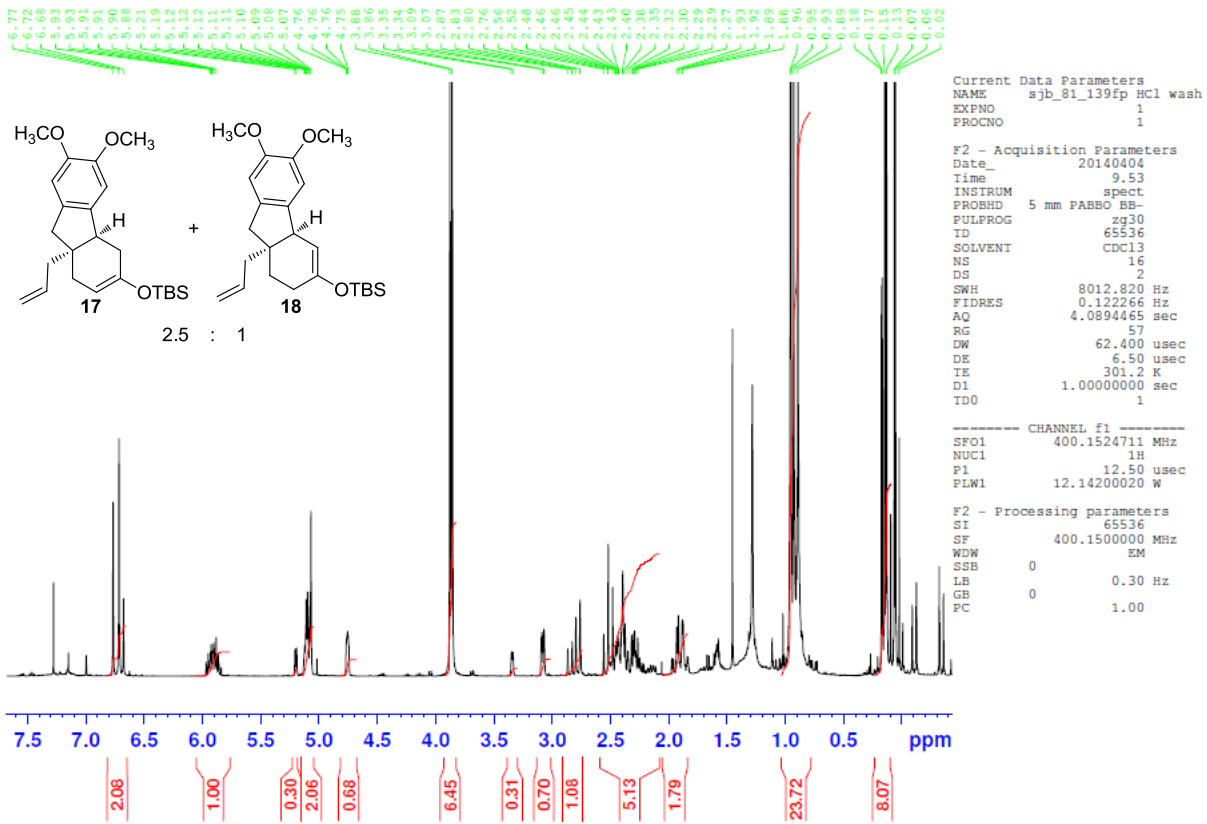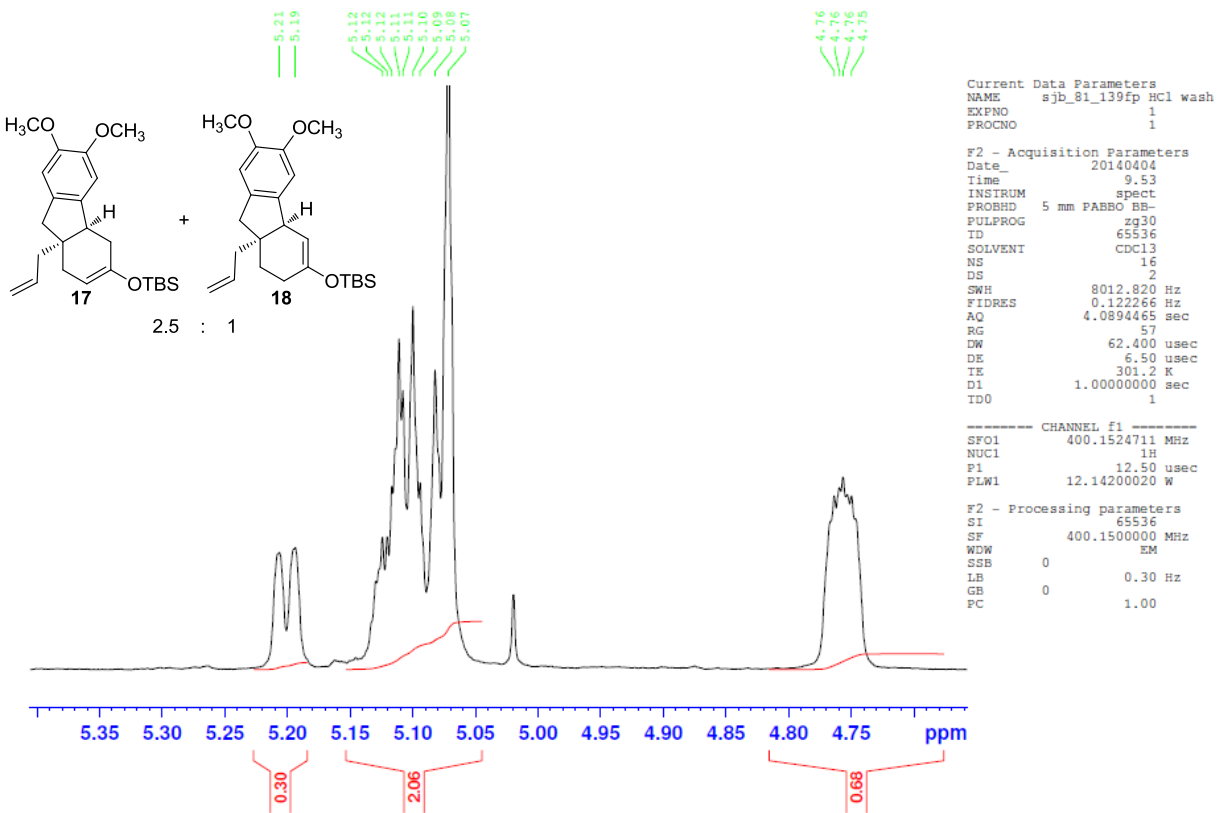



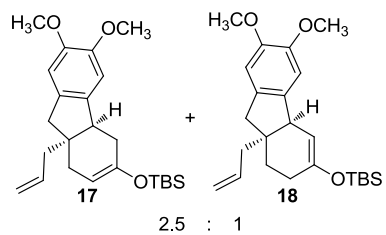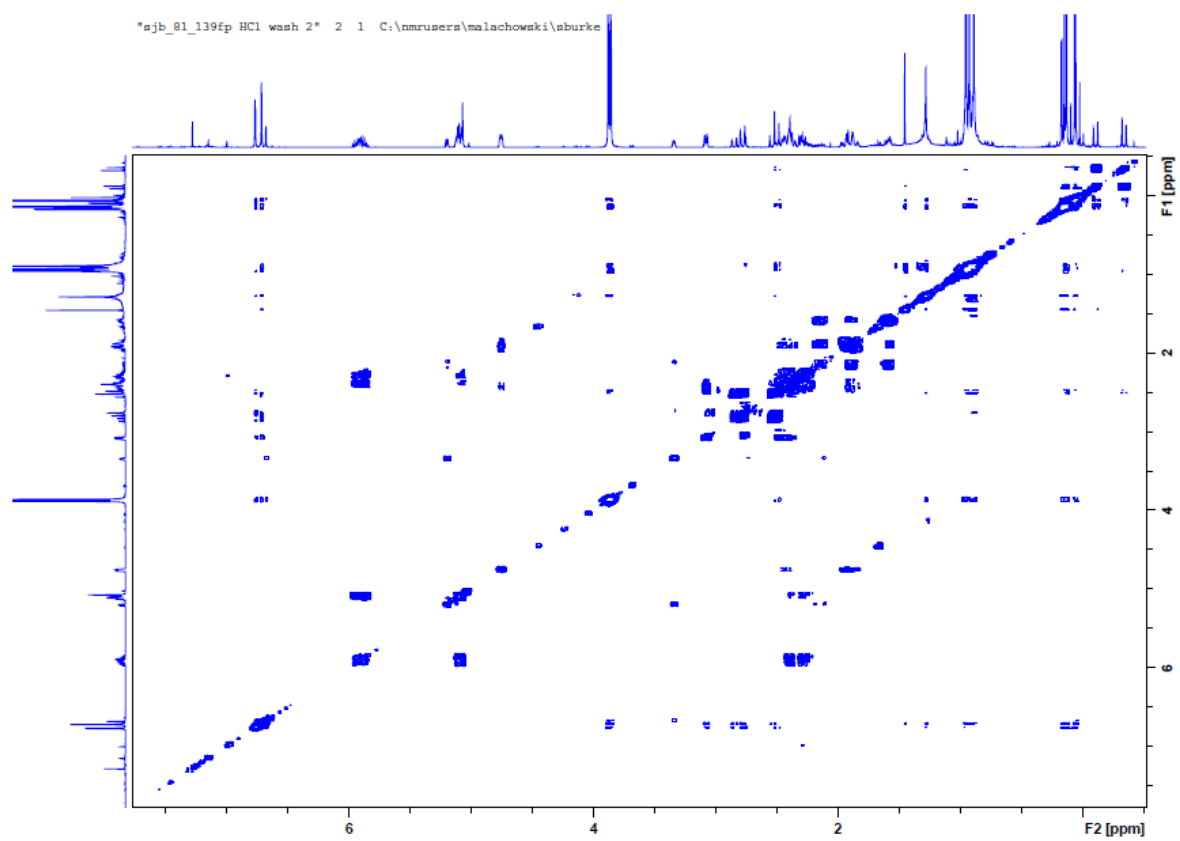

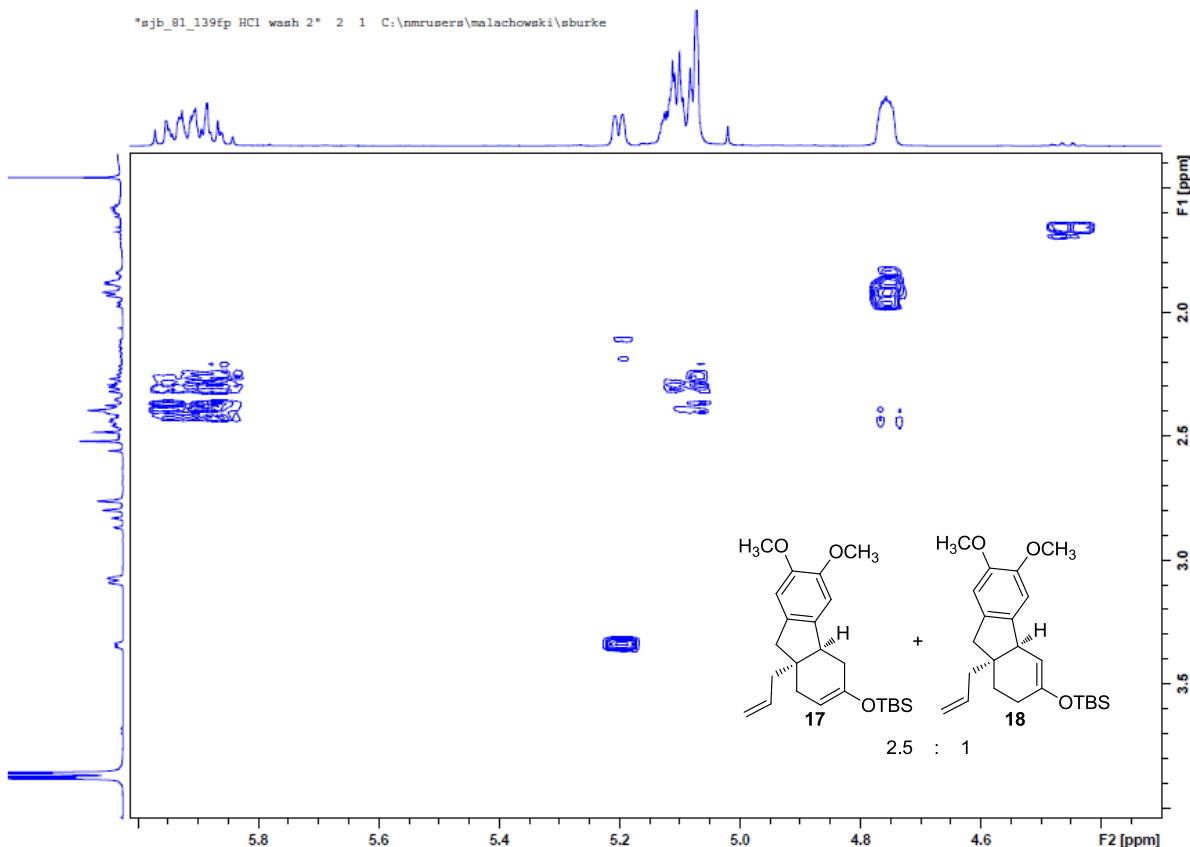

### Area Percent Report

Data Path : C:\msdchem\1\DATA\  
 Data File : sjb\_81\_139fp.D  
 Acq On : 4 Apr 2014 10:33  
 Operator : sjb  
 Sample : sjb\_81\_139fp  
 Misc :  
 ALS Vial : 100 Sample Multiplier: 1

Integration Parameters: autoint1.e  
 Integrator: ChemStation

Method : C:\msdchem\1\METHODS\ckr3.m  
 Title :

Signal : TIC: sjb\_81\_139fp.D\data.ms

| peak # | R.T. min | first scan | max scan | last scan | PK TY | peak height | corr. area | corr. % max. | % of total |
|--------|----------|------------|----------|-----------|-------|-------------|------------|--------------|------------|
| 1      | 8.833    | 737        | 743      | 748       | BV    | 449693      | 5482203    | 1.36%        | 0.899%     |
| 2      | 10.539   | 1028       | 1041     | 1044      | BV    | 22326971    | 404324493  | 100.00%      | 66.320%    |
| 3      | 10.570   | 1044       | 1047     | 1076      | VB    | 15532325    | 199850556  | 49.43%       | 32.781%    |

Abundance

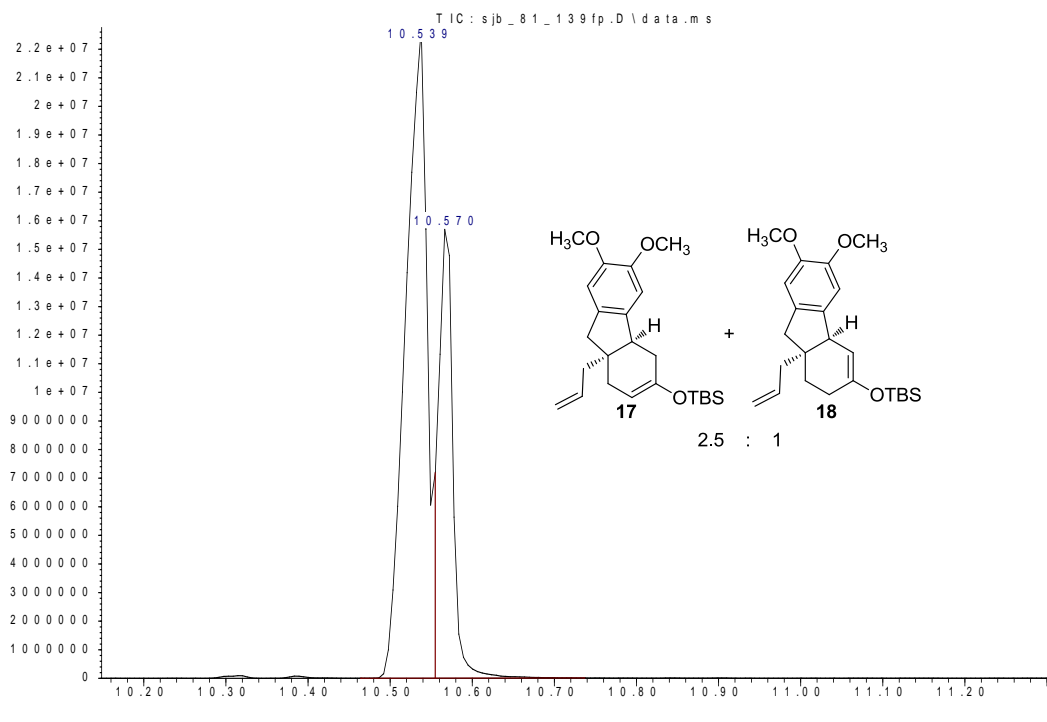

Abundance

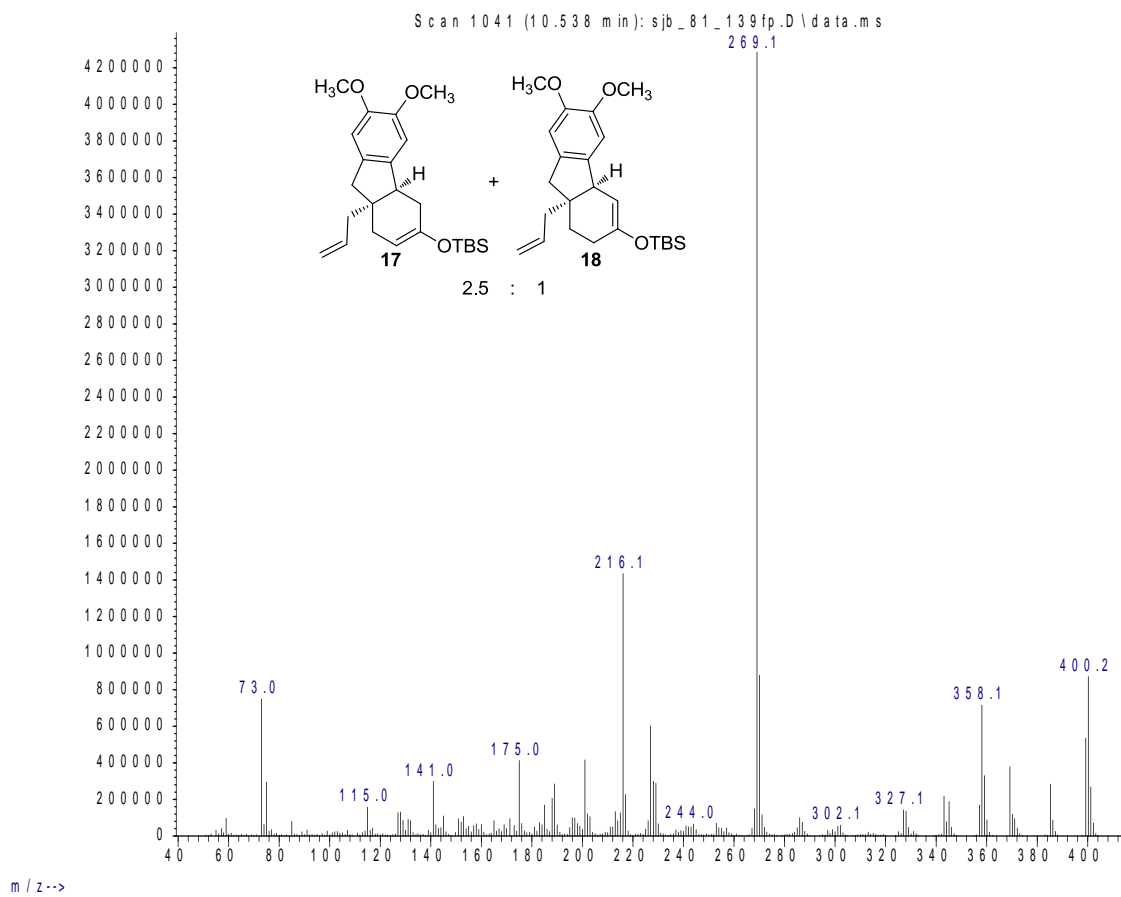

Abundance

Scan 1046 (10.566 min): sjb\_81\_139fp.D\data.ms

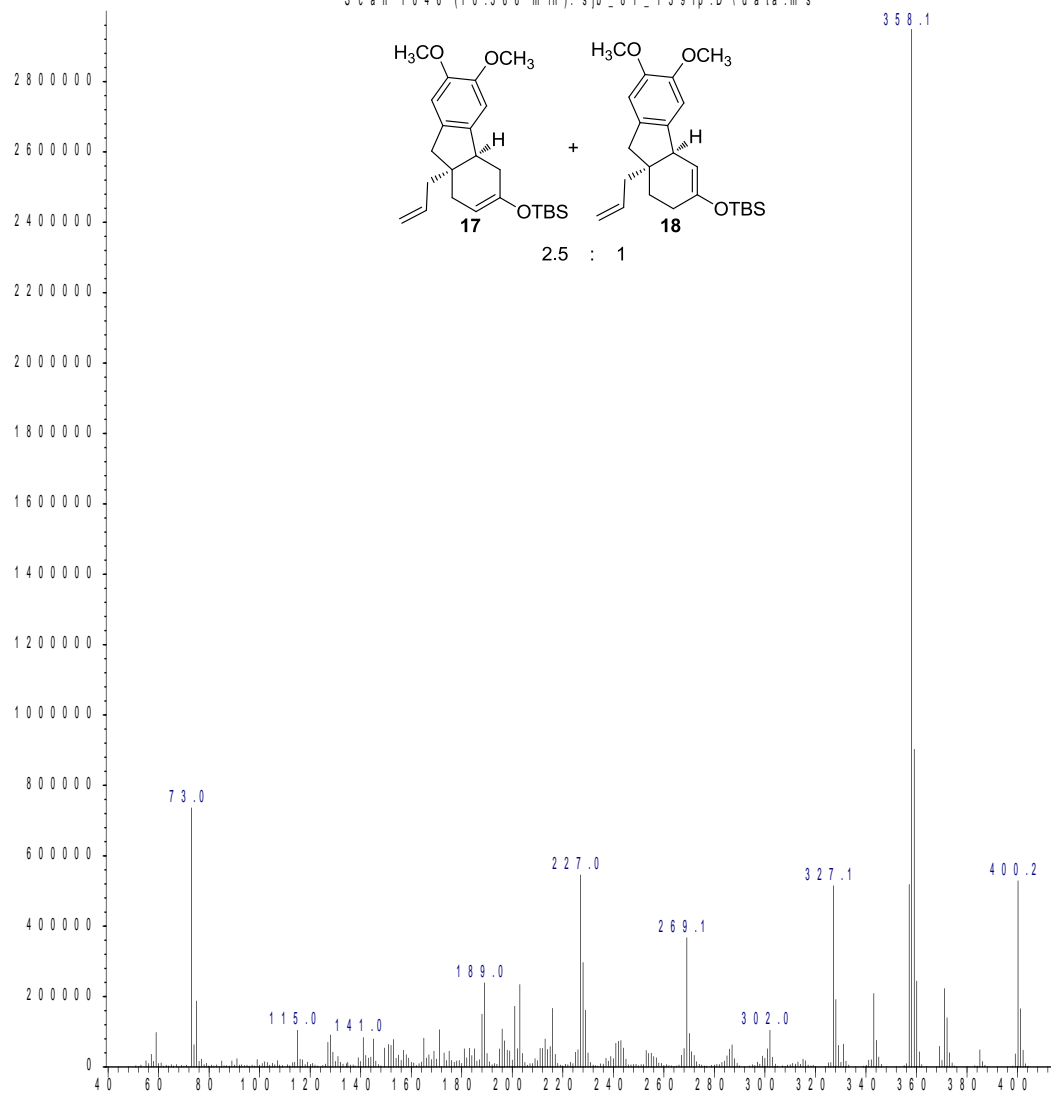

m/z-->

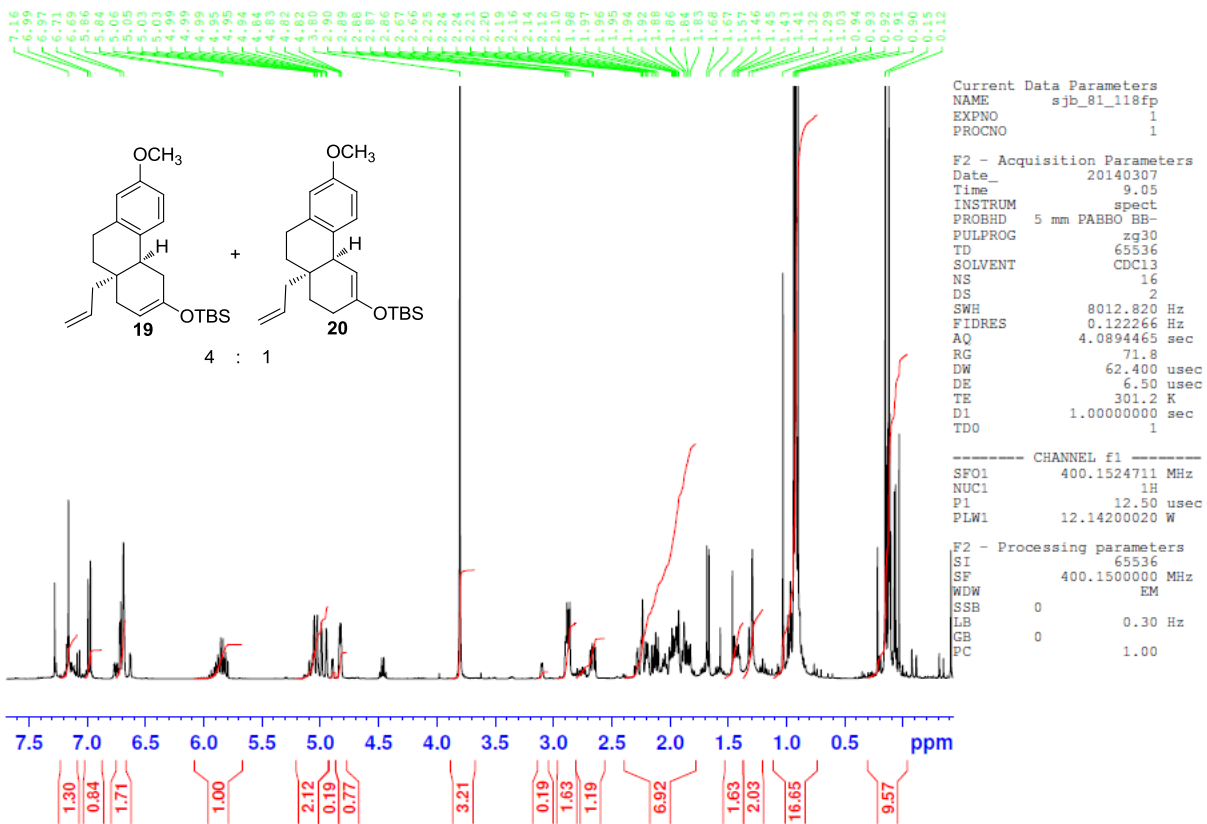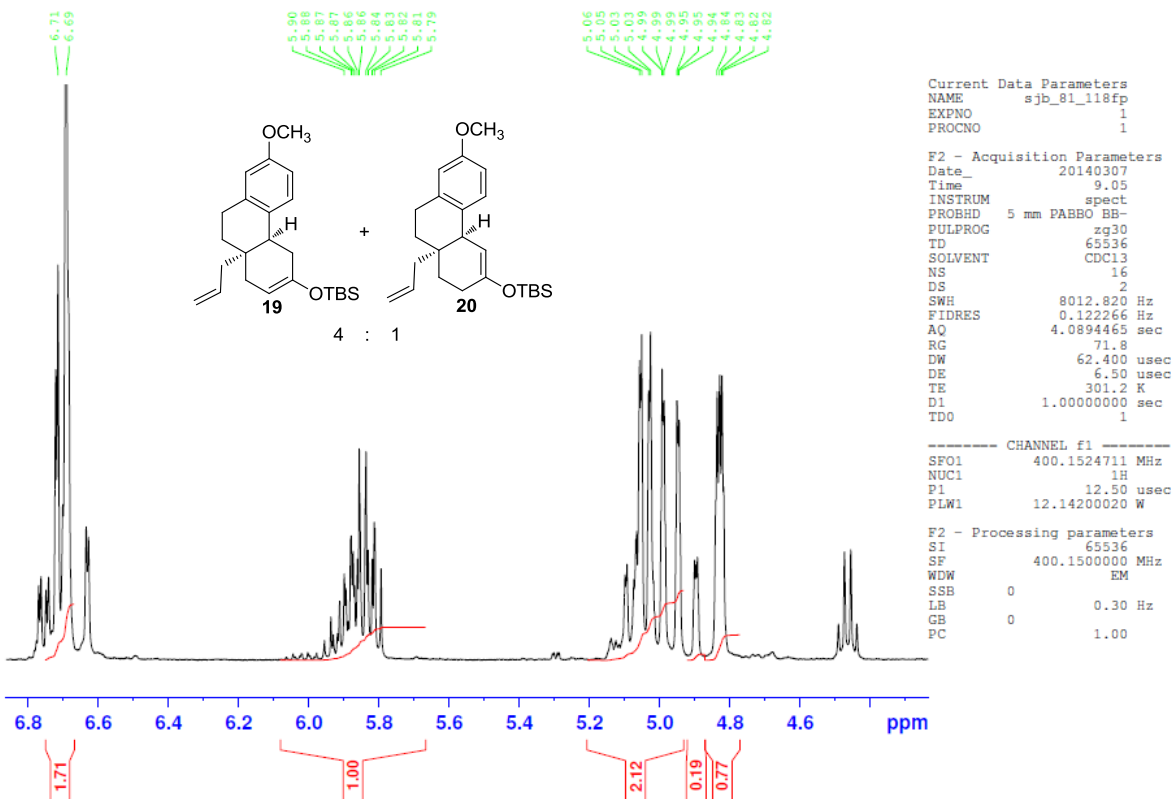

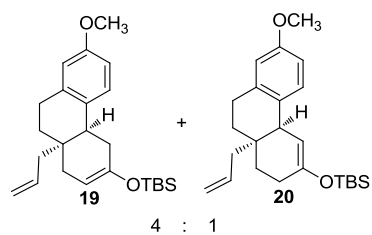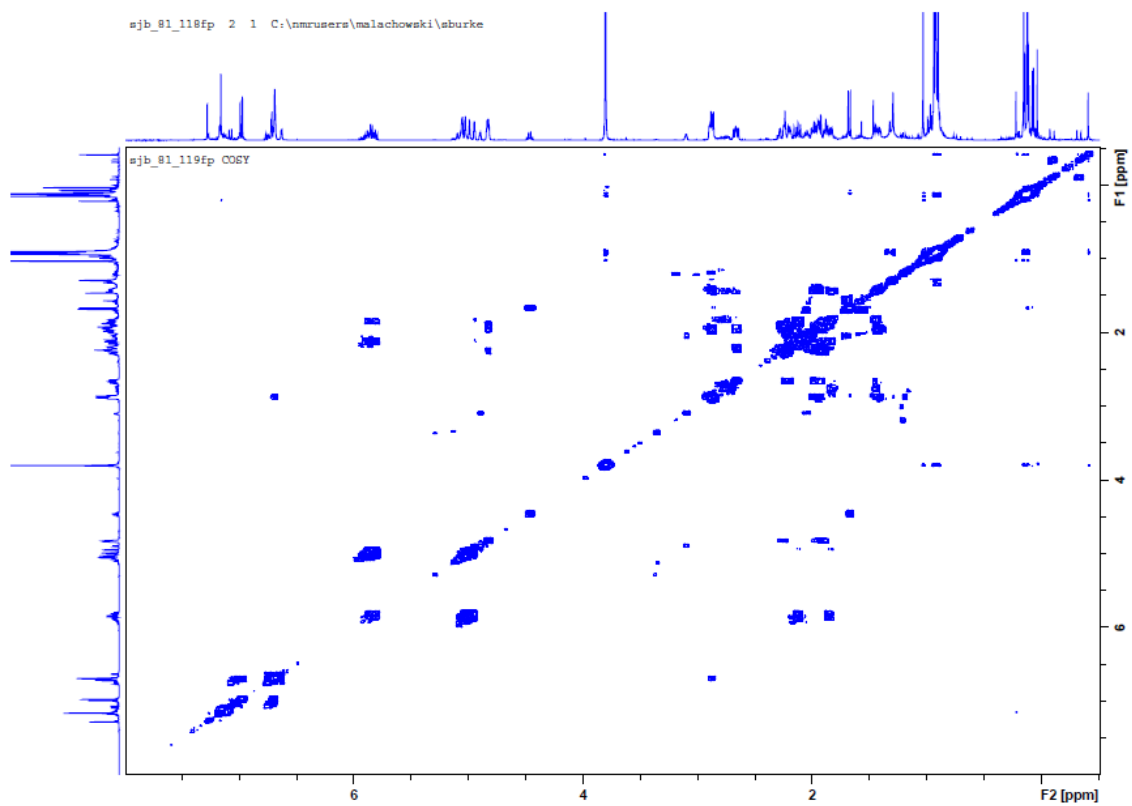

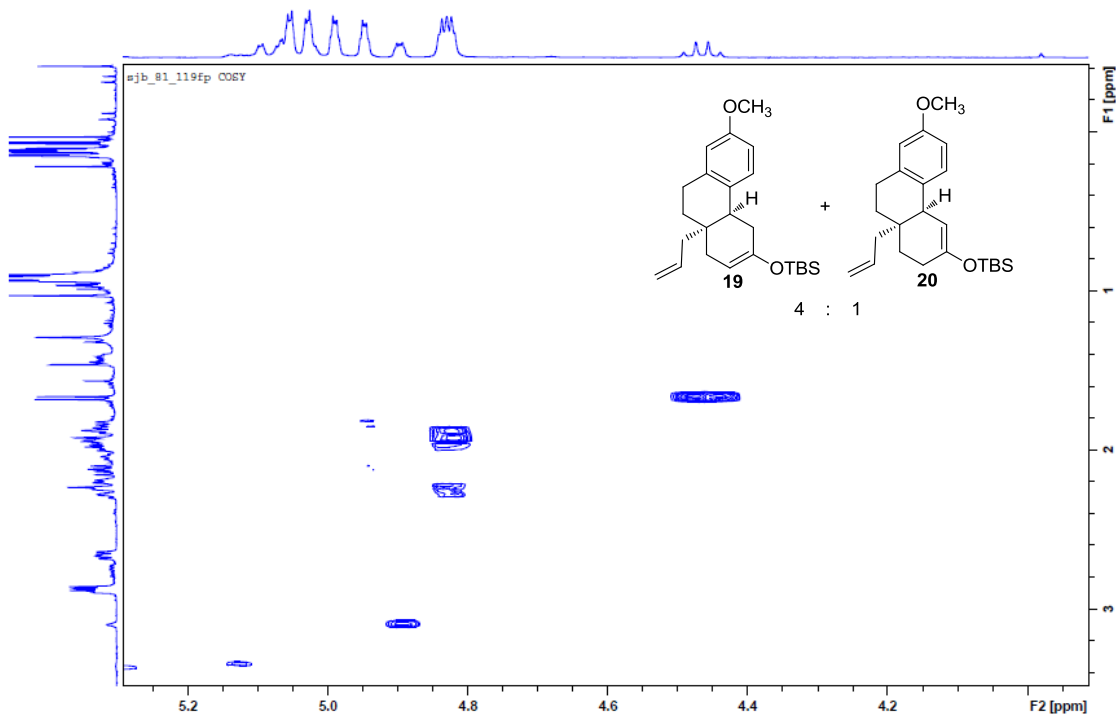

Area Percent Report

Data Path : C:\msdchem\1\DATA\  
 Data File : sjb\_81\_118fp2.D  
 Acq On : 7 Mar 2014 10:09  
 Operator : sjb  
 Sample : sjb\_81\_118fp2  
 Misc :  
 ALS Vial : 85 Sample Multiplier: 1

Integration Parameters: autoint1.e  
 Integrator: ChemStation

Method : C:\msdchem\1\METHODS\ckr3.m  
 Title :

Signal : TIC: sjb\_81\_118fp2.D\data.ms

| peak # | R.T. min | first scan | max scan | last scan | PK TY | peak height | corr. area | corr. % max. | % of total |
|--------|----------|------------|----------|-----------|-------|-------------|------------|--------------|------------|
| 1      | 5.201    | 104        | 108      | 114       | PB 2  | 87210       | 899707     | 0.52%        | 0.342%     |
| 2      | 8.484    | 674        | 682      | 687       | PV    | 120399      | 1516861    | 0.87%        | 0.577%     |
| 3      | 8.838    | 736        | 744      | 755       | PV    | 1657895     | 20458627   | 11.73%       | 7.776%     |
| 4      | 9.977    | 936        | 943      | 948       | VV 2  | 341301      | 4863739    | 2.79%        | 1.849%     |
| 5      | 10.028   | 948        | 952      | 961       | VV    | 193154      | 3209783    | 1.84%        | 1.220%     |



|    |        |      |      |      |      |          |           |         |         |
|----|--------|------|------|------|------|----------|-----------|---------|---------|
| 6  | 10.130 | 965  | 970  | 973  | VV 6 | 39706    | 723550    | 0.41%   | 0.275%  |
| 7  | 10.273 | 990  | 995  | 997  | VV 5 | 131194   | 1980406   | 1.14%   | 0.753%  |
| 8  | 10.302 | 997  | 1000 | 1010 | VV 2 | 213577   | 4417680   | 2.53%   | 1.679%  |
| 9  | 10.431 | 1010 | 1022 | 1030 | VV   | 3434232  | 48673209  | 27.91%  | 18.499% |
| 10 | 10.508 | 1030 | 1036 | 1050 | VV   | 13009865 | 174420154 | 100.00% | 66.291% |
| 11 | 10.611 | 1050 | 1054 | 1056 | VV 5 | 112236   | 1948724   | 1.12%   | 0.741%  |

Sum of corrected areas: 263112441

ckr3.m Tue Mar 25 16:57:32 2014

Abundance

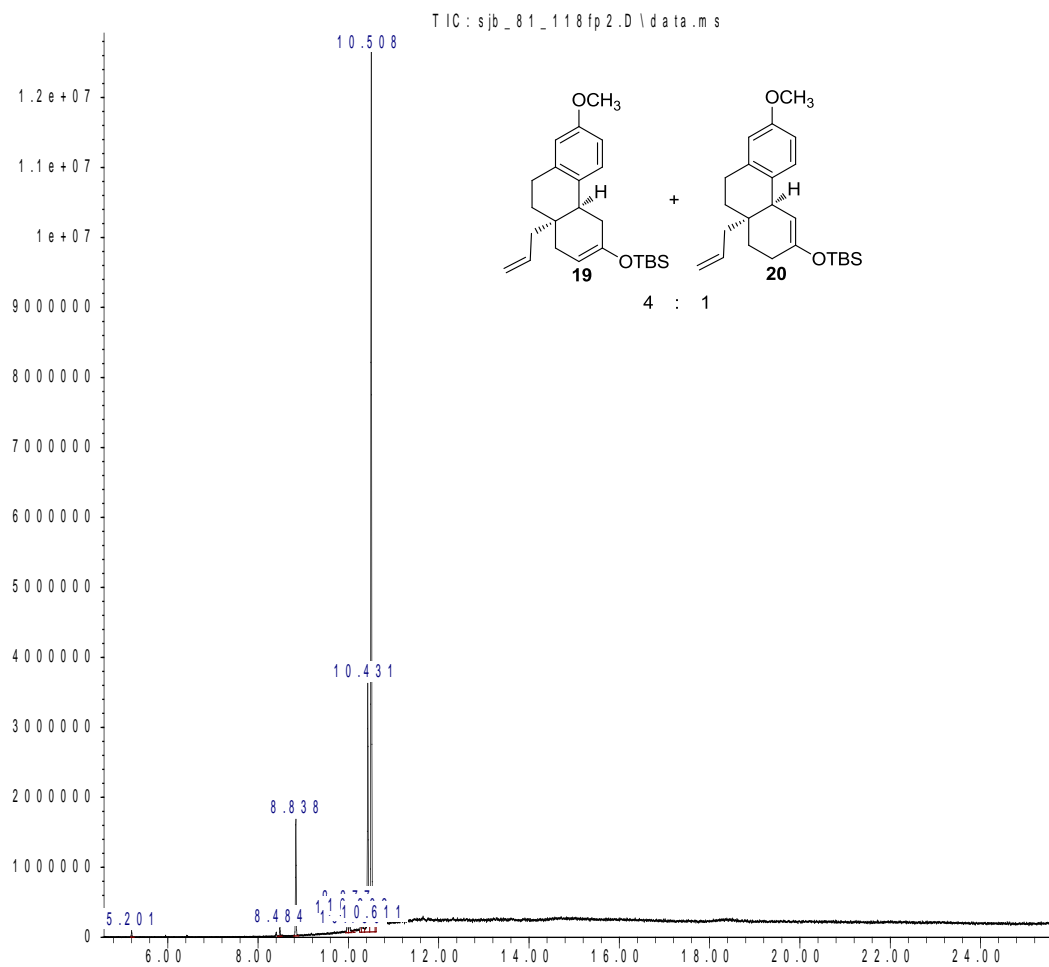

Abundance

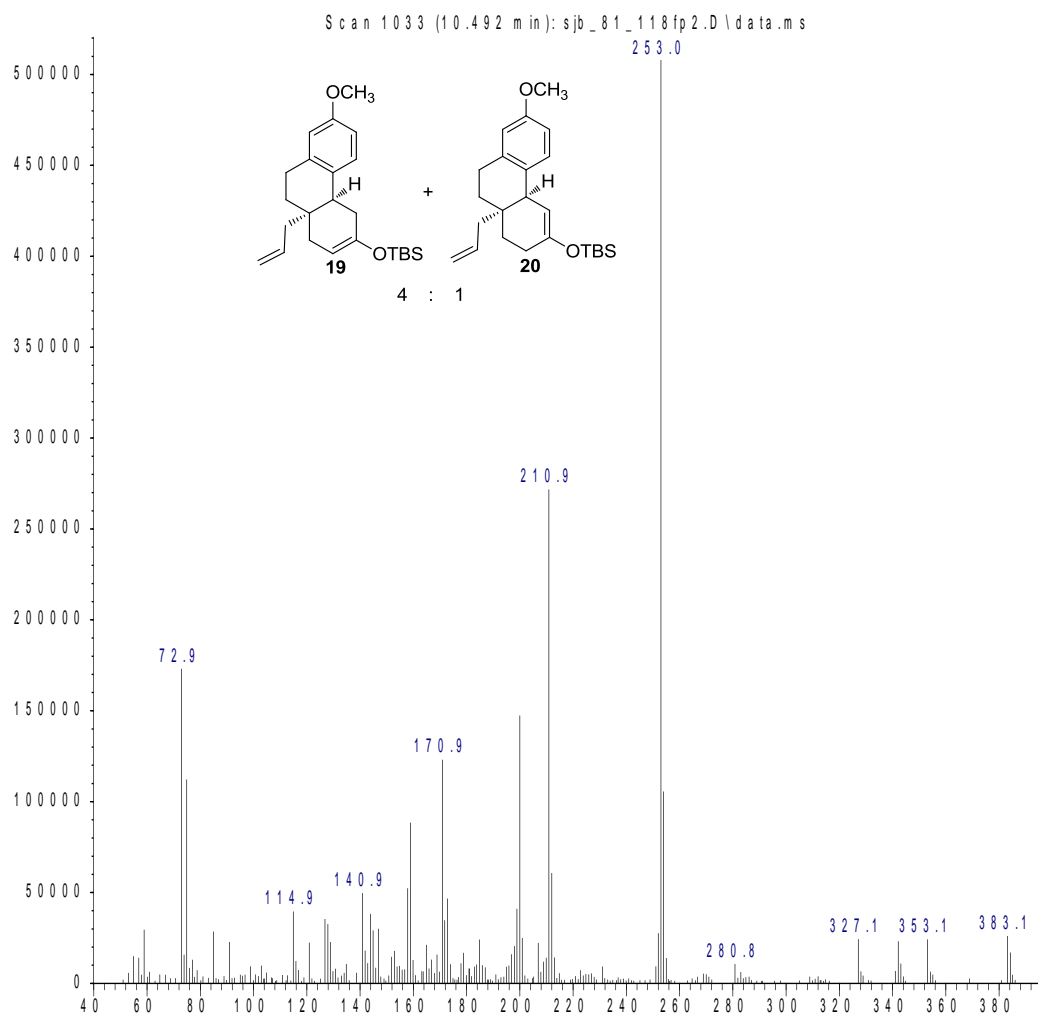

m/z-->

Abundance

Scan 1023 (10.435 min): sjb\_81\_118fp2.D\data.ms

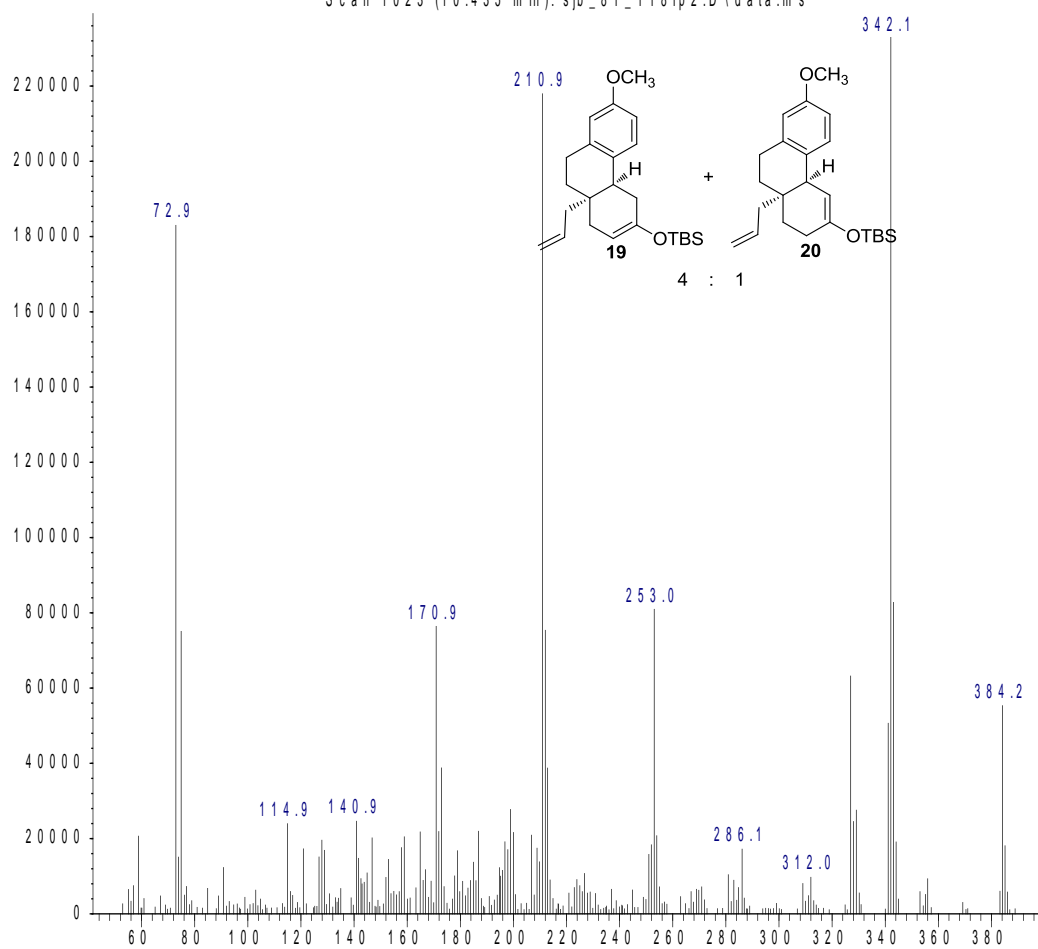

m/z-->

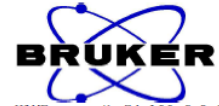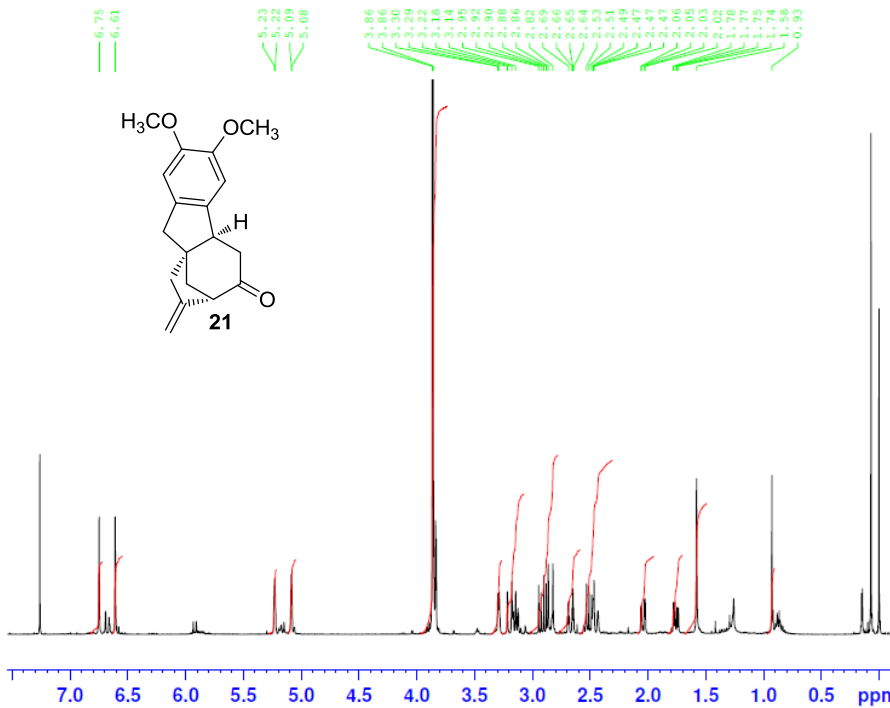

NAME sjb\_74\_180 fr3-5  
EXPNO 1  
PROCNO 1  
Date\_ 20121022  
Time 10.12  
INSTRUM spect  
PROBHD 5 mm DUL 13C-1  
PULPROG zg30  
TD 65536  
SOLVENT CDCl3  
NS 16  
DS 2  
SWH 8223.685 Hz  
FIDRES 0.125483 Hz  
AQ 3.9846387 sec  
RG 203  
DW 60.800 usec  
DE 6.50 usec  
TE 301.2 K  
D1 1.00000000 sec  
TDO 1

===== CHANNEL f1 =====  
NUC1 1H  
P1 9.80 usec  
PL1 -4.00 dB  
PL1W 19.24419975 W  
SFO1 400.1524711 MHz  
SI 32768  
SF 400.1500084 MHz  
WDW EM  
SSB 0  
LB 0.30 Hz  
GB 0  
PC 1.00

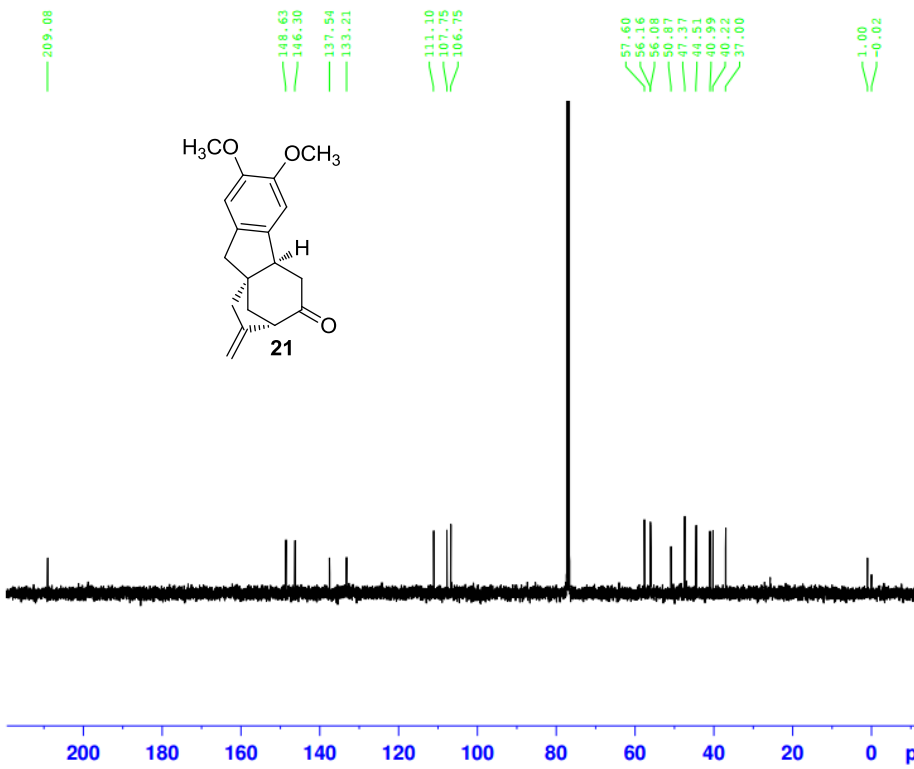

Current Data Parameters  
NAME sjb\_74\_180 fr 3-5 13C  
EXPNO 1  
PROCNO 1

F2 - Acquisition Parameters  
Date\_ 20121022  
Time 11.38  
INSTRUM spect  
PROBHD 5 mm DUL 13C-1  
PULPROG zgpg30  
TD 65536  
SOLVENT CDCl3  
NS 256  
DS 4  
SWH 24038.461 Hz  
FIDRES 0.366798 Hz  
AQ 1.3631488 sec  
RG 203  
DW 20.800 usec  
DE 6.50 usec  
TE 301.2 K  
D1 2.00000000 sec  
D11 0.03000000 sec  
TDO 1

===== CHANNEL f1 =====  
NUC1 13C  
P1 9.00 usec  
PL1 0 dB  
PL1W 35.41759872 W  
SFO1 100.6278593 MHz  
===== CHANNEL f2 =====  
CPDPRG[2] waltz16  
NUC2 1H  
PCPD2 80.00 usec  
PL2 -3.80 dB  
PL12 13.80 dB  
PL13 13.80 dB  
PL2W 18.37806702 W  
PL12W 0.31937420 W  
PL13W 0.31937420 W  
SFO2 400.1516006 MHz

F2 - Processing parameters  
SI 32768  
SF 100.6177980 MHz  
WDW EM  
SSB 0  
LB 1.00 Hz  
GB 0  
PC 1.40

Area Percent Report

Data Path : C:\msdchem\1\DATA\  
Data File : sjb\_74\_180 fr3-5.D  
Acq On : 19 Oct 2012 11:34  
Operator : sjb  
Sample : sjb\_74\_180 fr3-5  
Misc :  
ALS Vial : 10 Sample Multiplier: 1

Integration Parameters: autoint1.e  
Integrator: ChemStation

Method : C:\msdchem\1\METHODS\ckr3.m  
Title :

Signal : TIC: sjb\_74\_180 fr3-5.D\data.ms

| peak # | R.T. min | first scan | max scan | last scan | PK TY | peak height | corr. area | corr. % max. | % of total |
|--------|----------|------------|----------|-----------|-------|-------------|------------|--------------|------------|
| 1      | 9.494    | 850        | 859      | 872       | BV    | 798947      | 11914481   | 5.98%        | 5.277%     |
| 2      | 9.969    | 931        | 942      | 967       | BV    | 11427409    | 199102091  | 100.00%      | 88.184%    |
| 3      | 10.725   | 1063       | 1074     | 1082      | BV    | 1129946     | 14764330   | 7.42%        | 6.539%     |

Sum of corrected areas: 225780902

ckr3.m Mon Apr 07 17:09:08 2014

Abundance

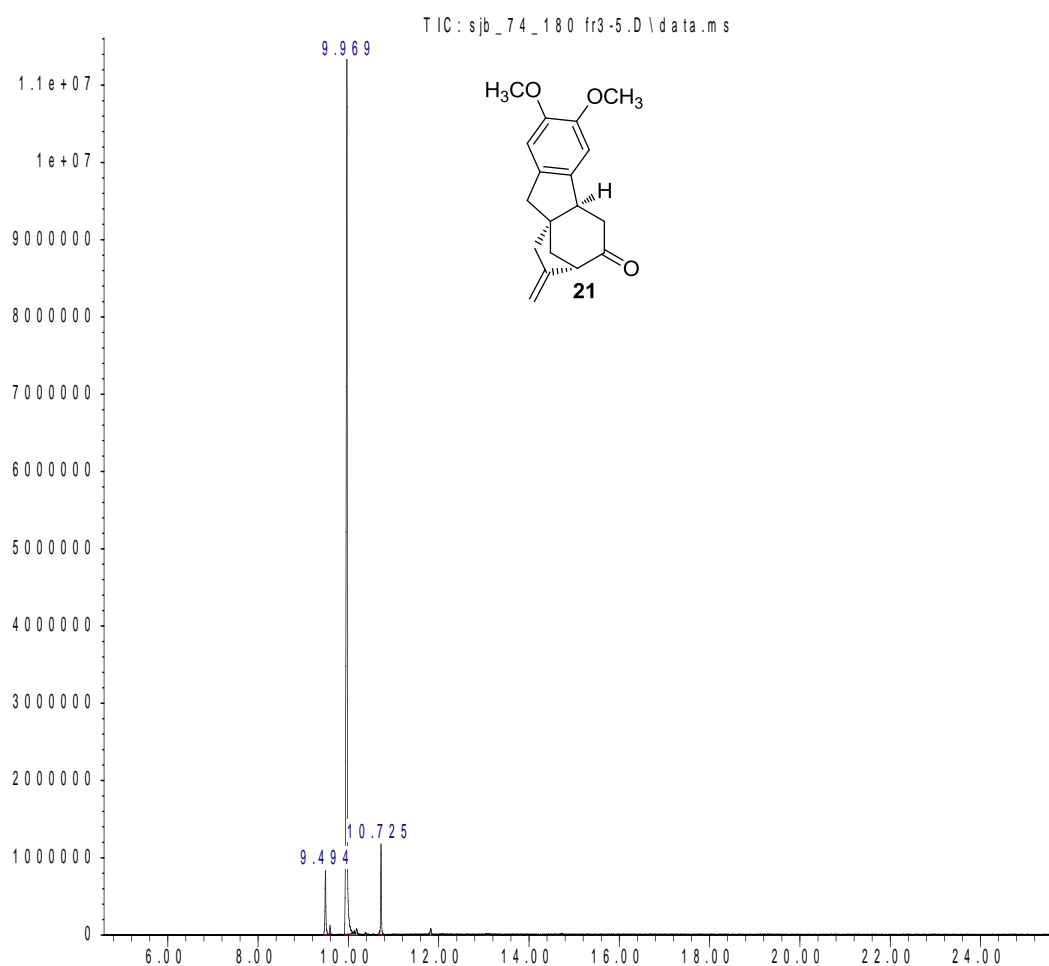

Abundance

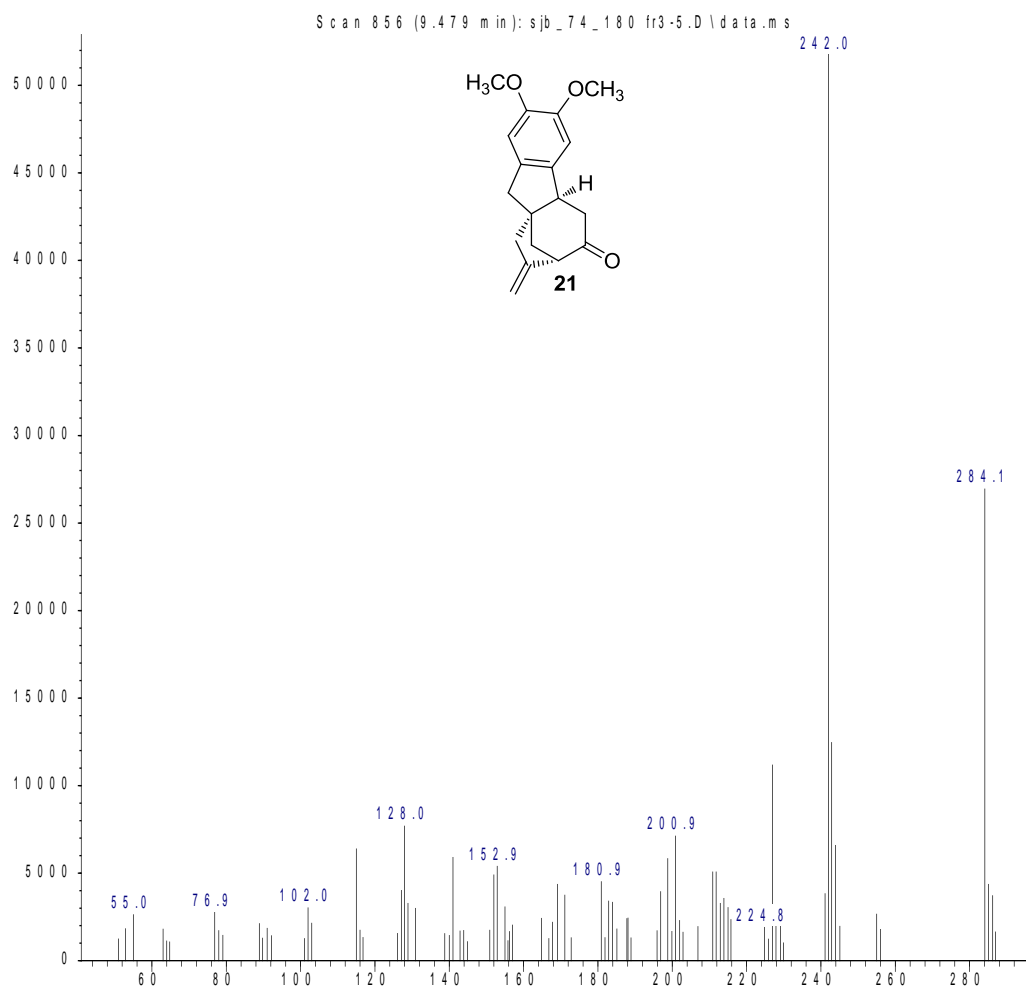

m/z-->

Abundance

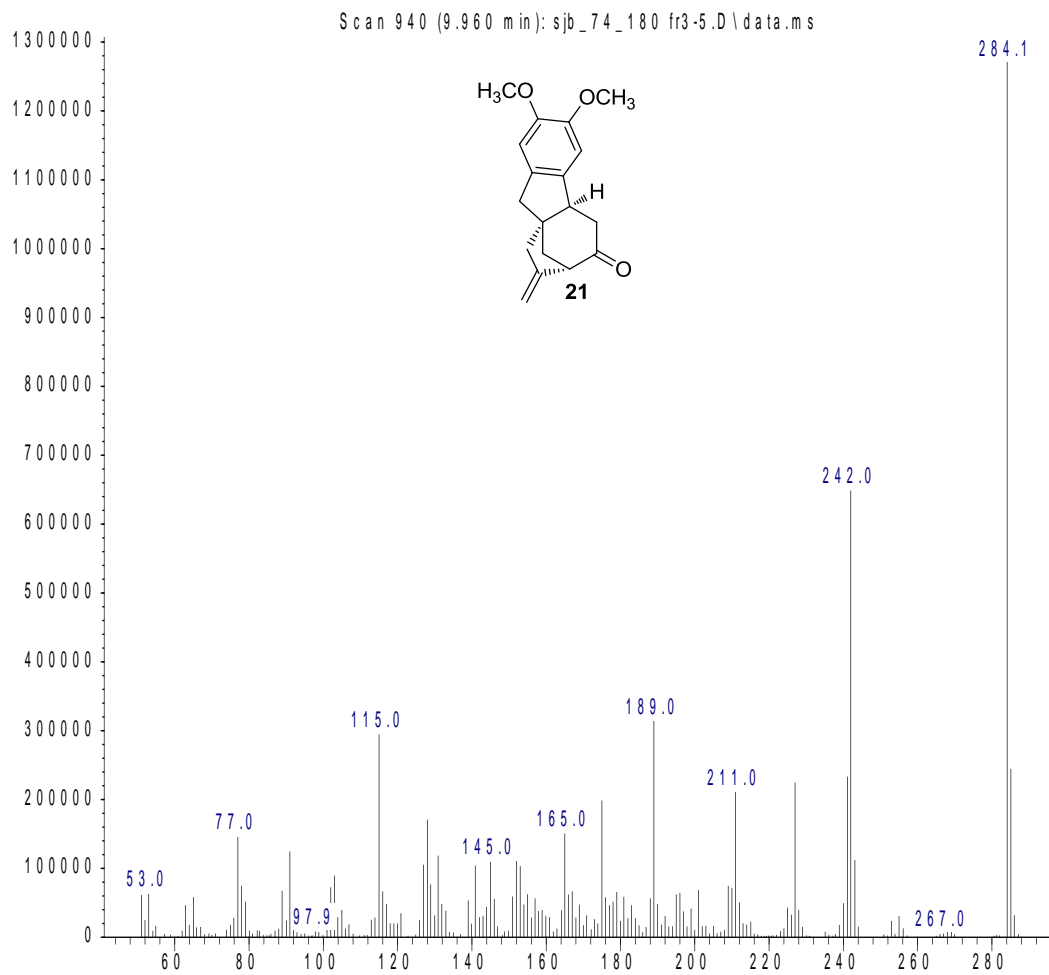

m/z-->



Abundance

Scan 1073 (10.721 min): sjb\_74\_180 fr3-5.D\data.ms

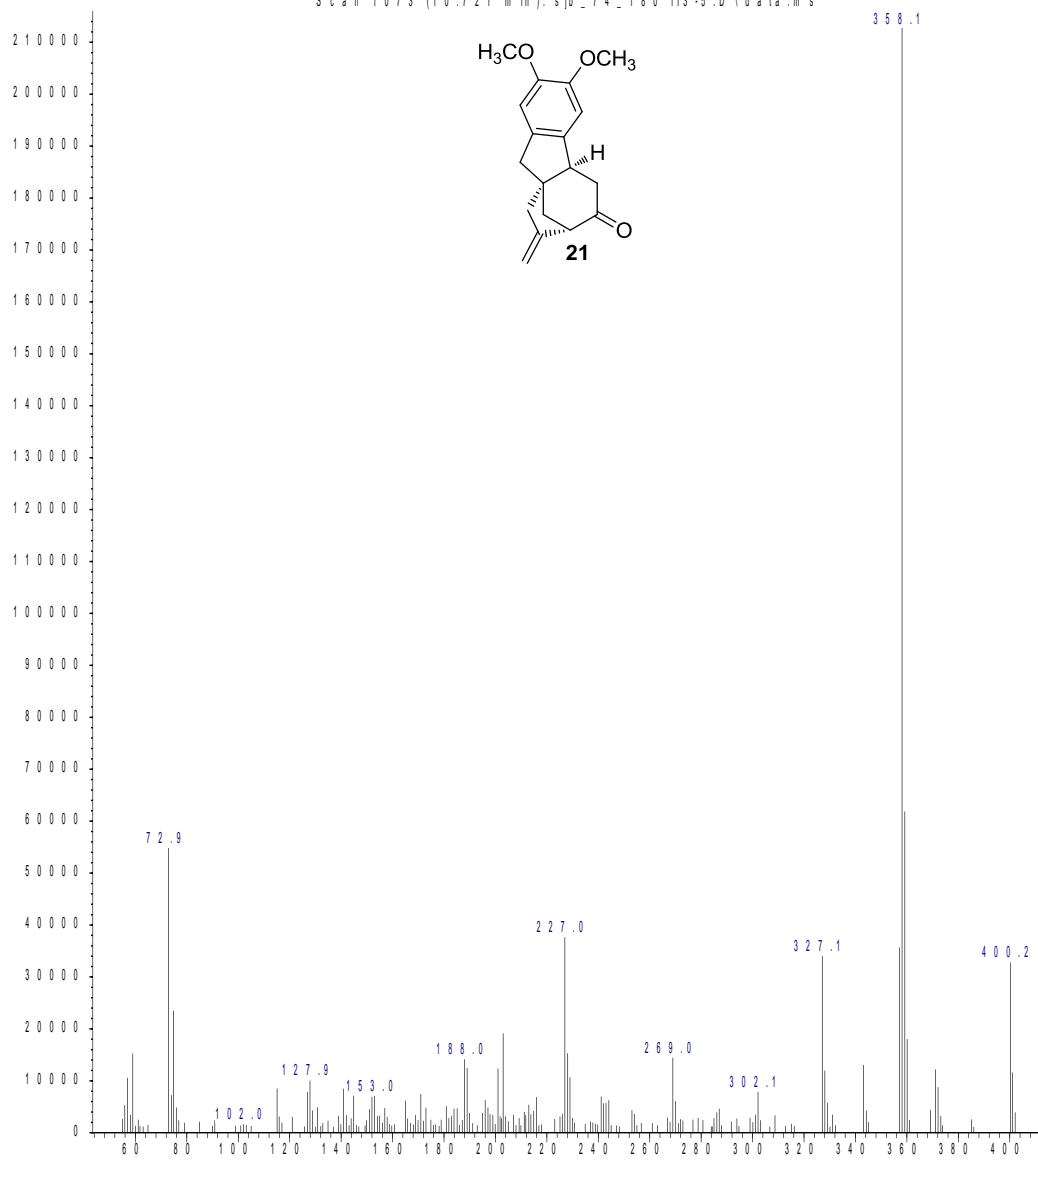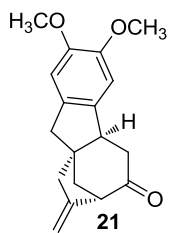

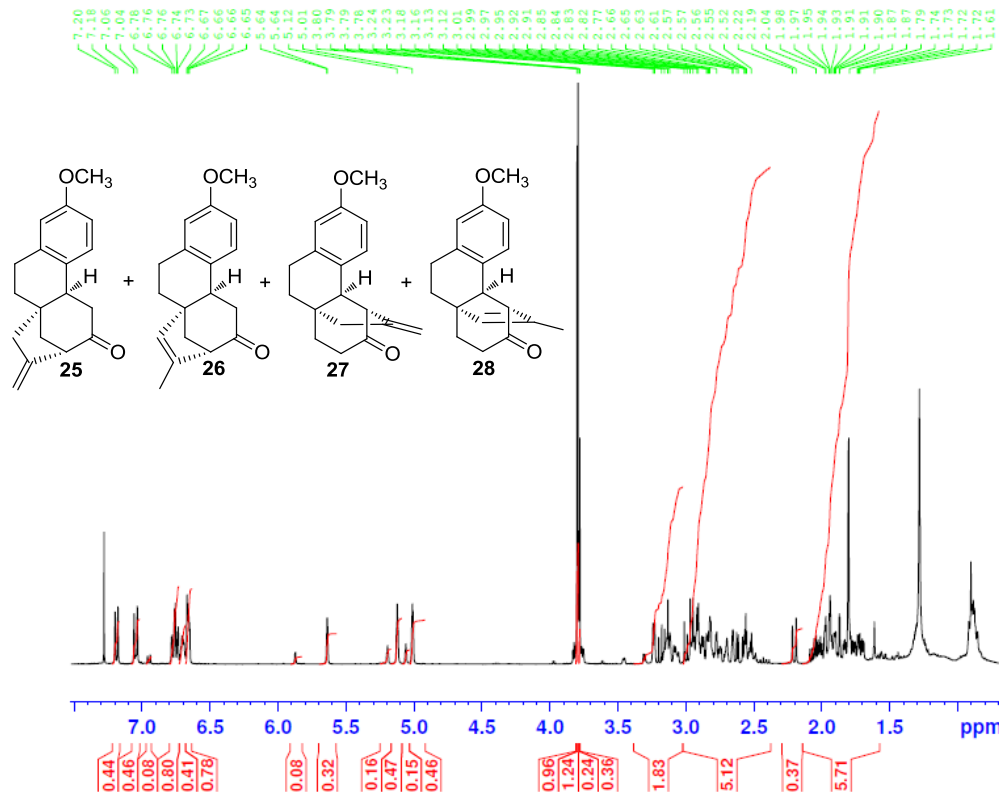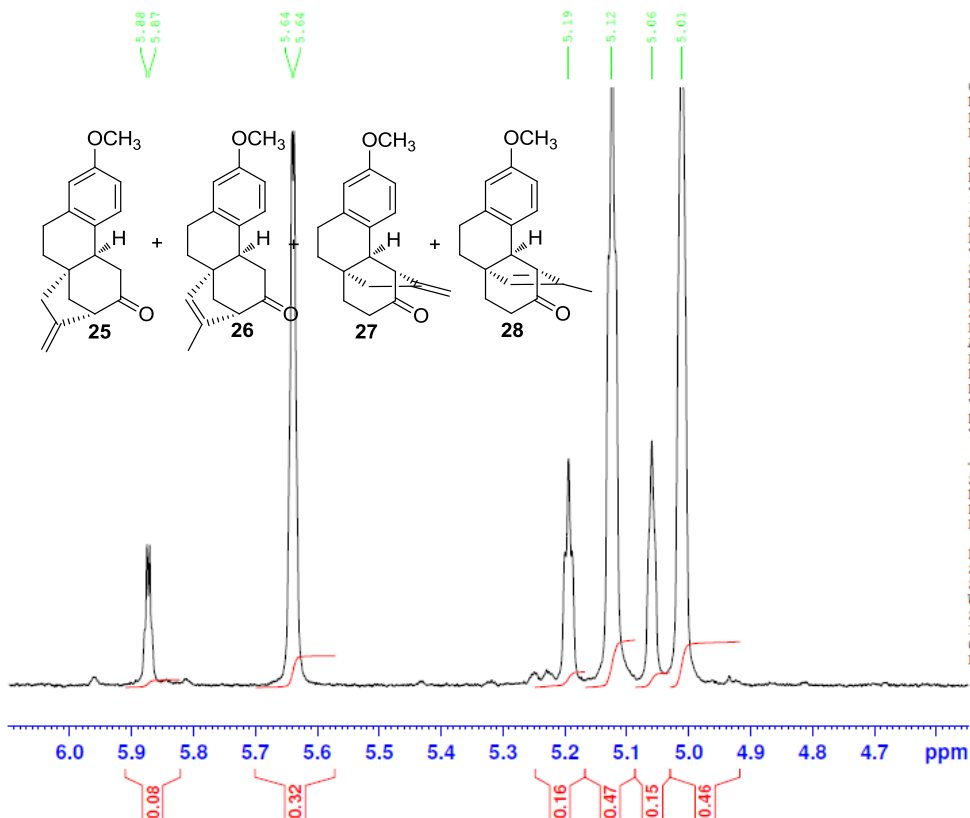

Area Percent Report

Data Path : C:\msdchem\1\DATA\  
Data File : sjb\_81\_121fp.D  
Acq On : 14 Mar 2014 9:05  
Operator : sjb  
Sample : sjb\_81\_121fp  
Misc :  
ALS Vial : 90 Sample Multiplier: 1

Integration Parameters: autoint1.e  
Integrator: ChemStation

Method : C:\msdchem\1\METHODS\ckr3.m  
Title :

Signal : TIC: sjb\_81\_121fp.D\data.ms

| peak # | R.T. min | first scan | max scan | last scan | PK TY | peak height | corr. area | corr. % max. | % of total |
|--------|----------|------------|----------|-----------|-------|-------------|------------|--------------|------------|
| 1      | 8.867    | 743        | 749      | 758       | BV    | 3522428     | 56027446   | 14.44%       | 6.629%     |
| 2      | 8.942    | 758        | 762      | 782       | VB 4  | 398136      | 10292277   | 2.65%        | 1.218%     |
| 3      | 9.218    | 805        | 810      | 818       | BV 2  | 561113      | 10095541   | 2.60%        | 1.195%     |
| 4      | 9.298    | 818        | 824      | 863       | VV 2  | 22894893    | 387965102  | 100.00%      | 45.906%    |
| 5      | 9.594    | 867        | 876      | 917       | VV    | 24458757    | 380749882  | 98.14%       | 45.052%    |

Sum of corrected areas: 845130248

ckr3.m Thu Mar 27 12:26:01 2014

Abundance

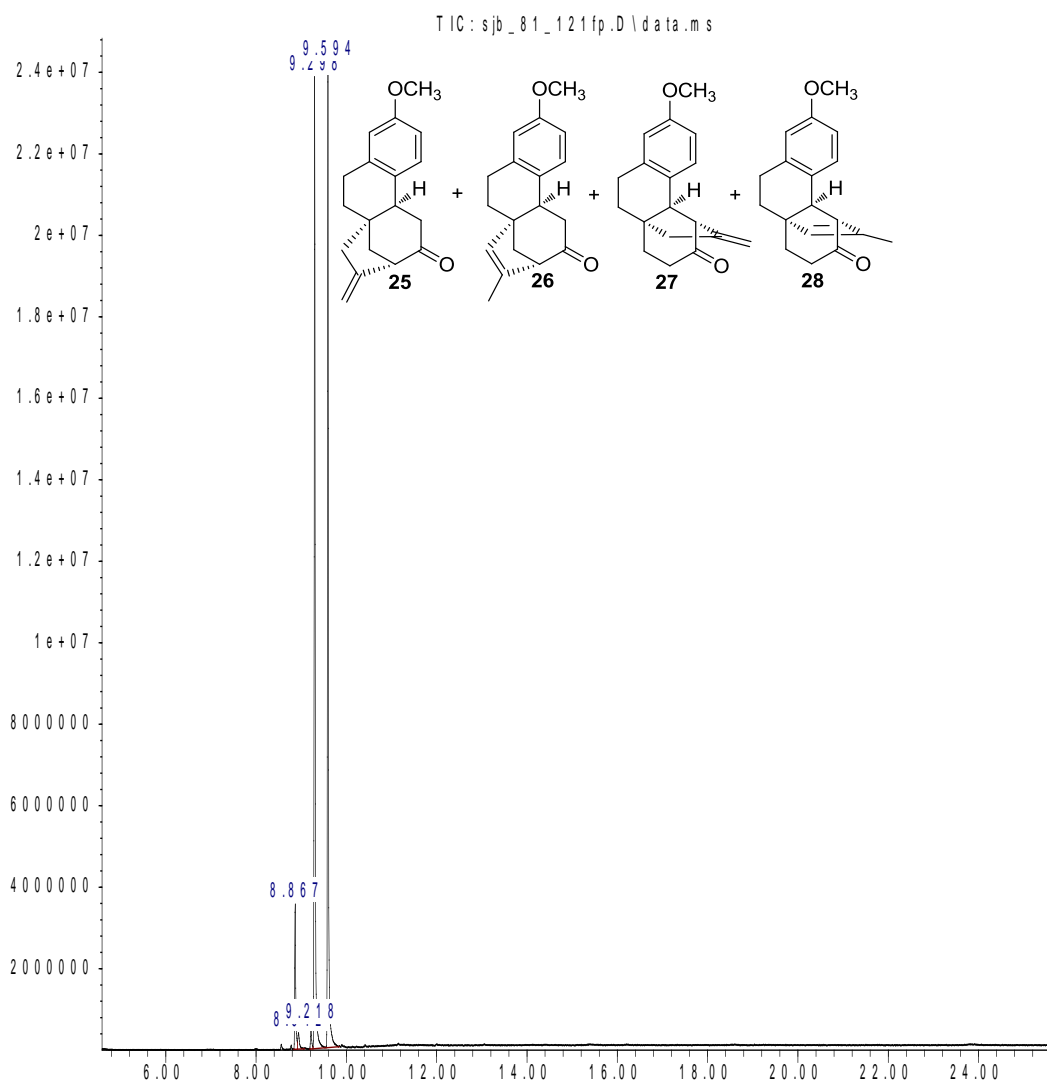

Time-->

Abundance

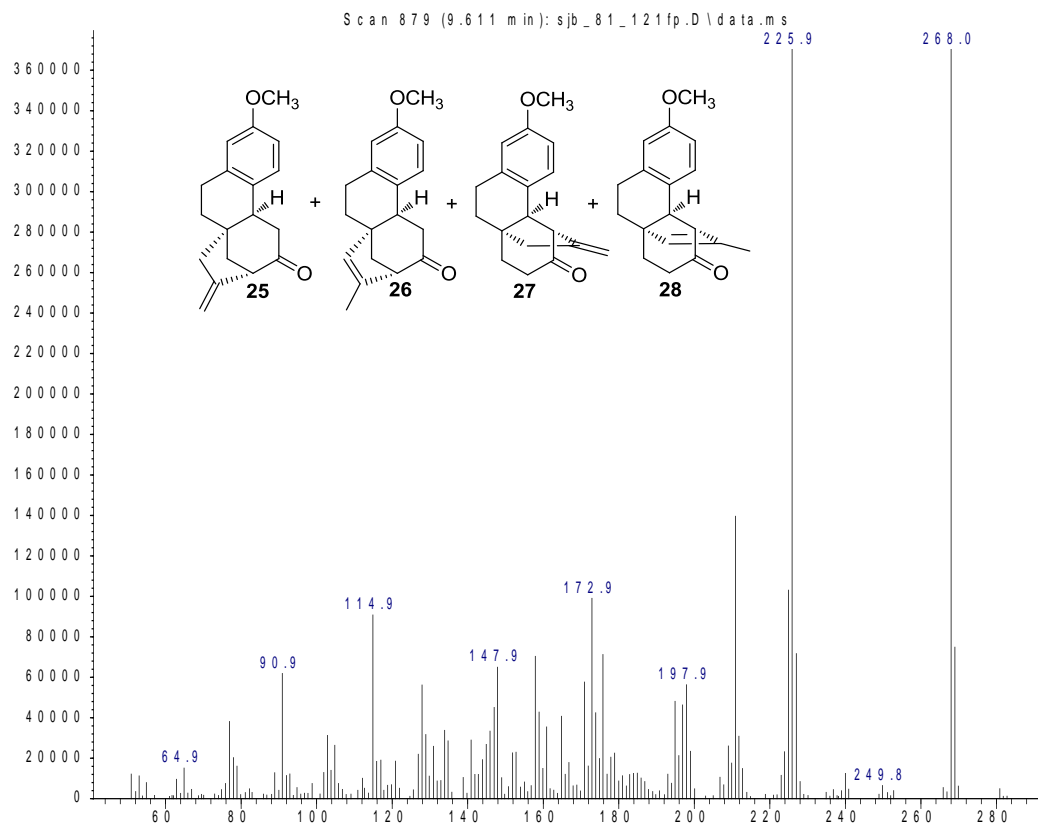

m/z-->

Abundance

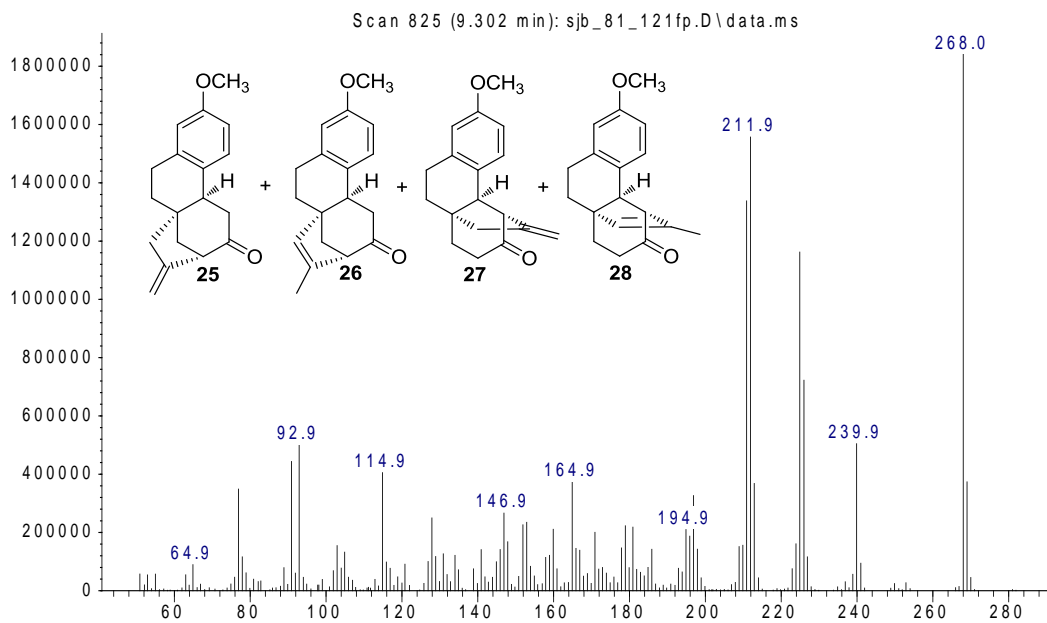

m/z-->

Abundance

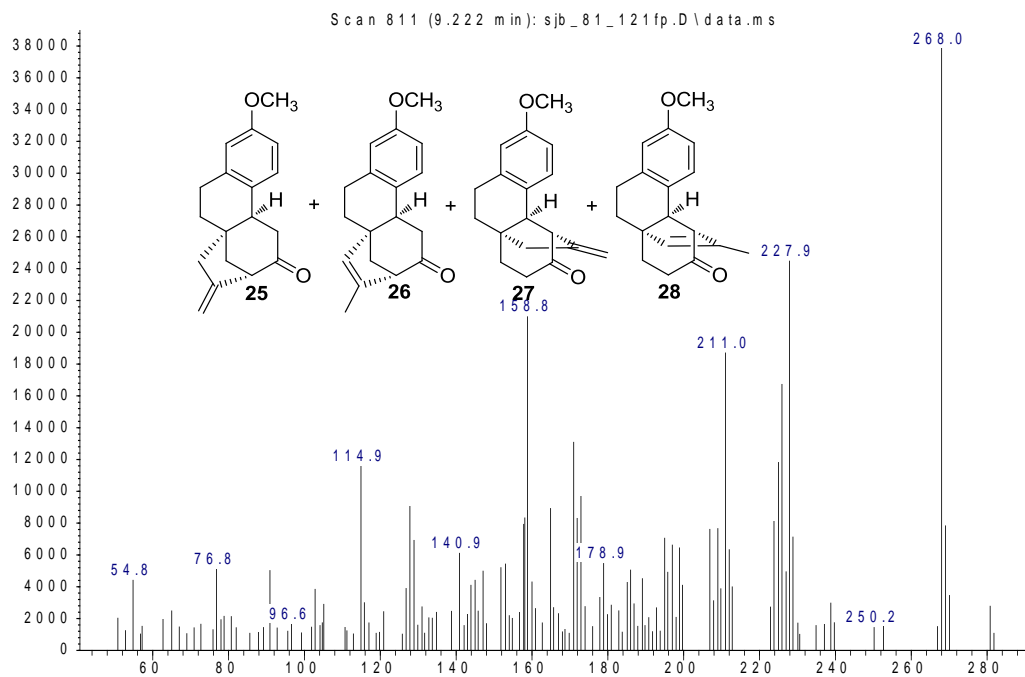

m/z-->  
Abundance

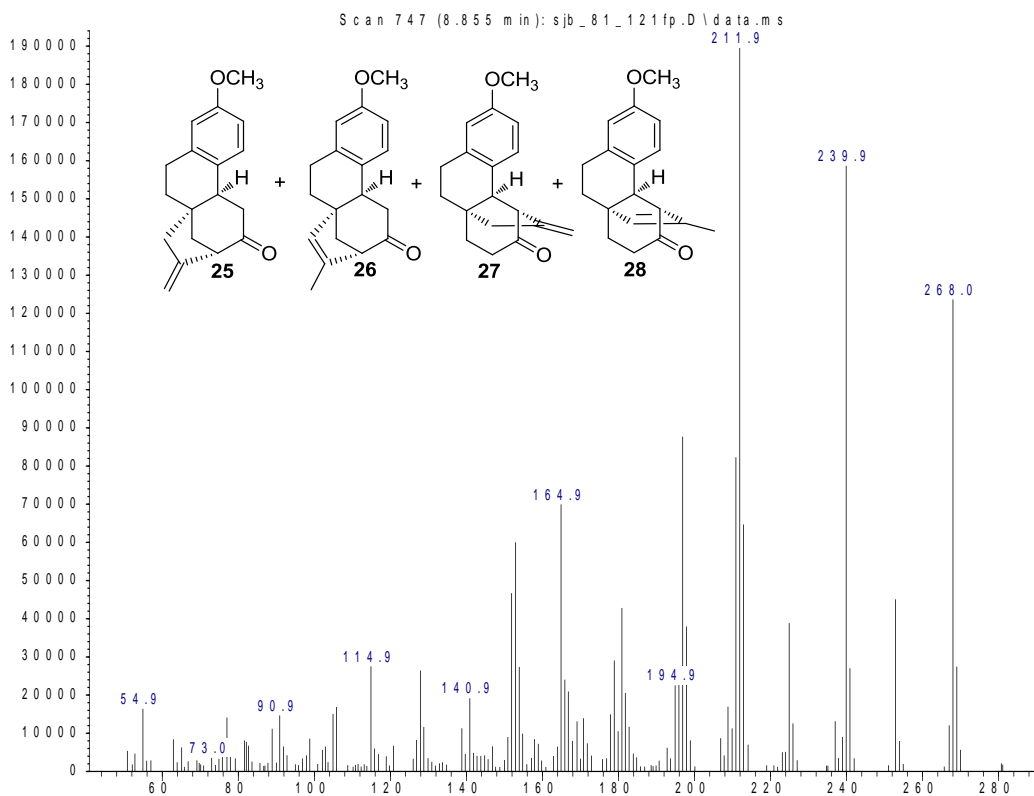

m/z-->

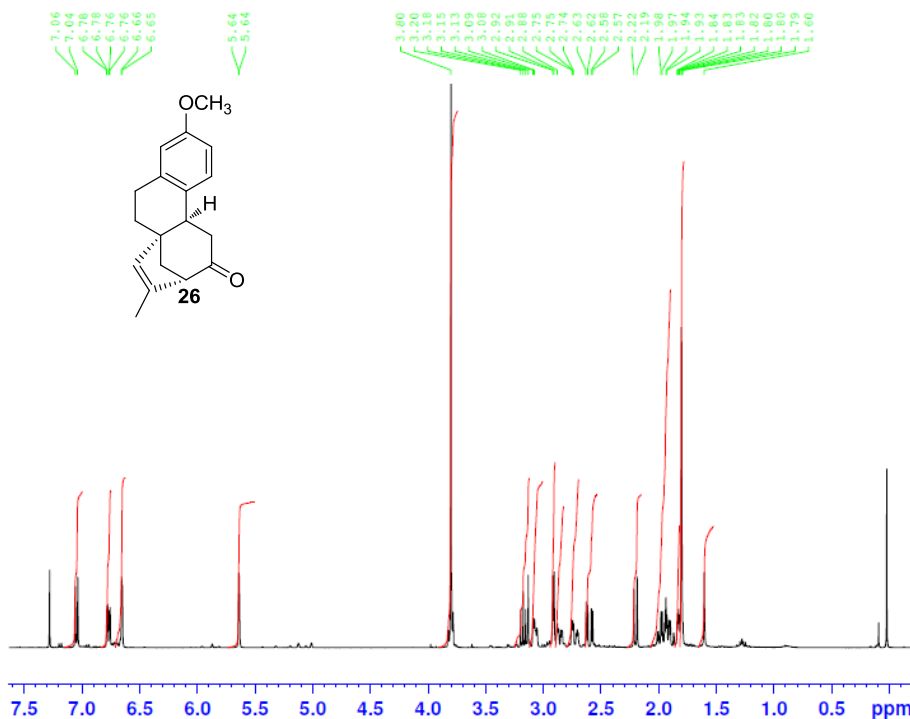

Current Data Parameters  
 NAME sjb\_81\_163 fr3 2  
 EXPNO 1  
 PROCNO 1

F2 - Acquisition Parameters  
 Date\_ 20140508  
 Time 8.24  
 INSTRUM spect  
 PROBHD 5 mm PABBO BB-  
 PULPROG zg30  
 TD 65536  
 SOLVENT CDCl3  
 NS 16  
 DS 2  
 SWH 8012.820 Hz  
 FIDRES 0.122266 Hz  
 AQ 4.089465 sec  
 RC 161  
 DW 62.400 usec  
 DE 6.50 usec  
 TE 301.2 K  
 D1 1.00000000 sec  
 TDO 1

----- CHANNEL f1 -----  
 SFO1 400.1524711 MHz  
 NUC1 1H  
 P1 12.50 usec  
 PLW1 12.14200020 W

F2 - Processing parameters  
 SI 65536  
 SF 400.1500000 MHz  
 WDW EM  
 SSB 0  
 LB 0.30 Hz  
 GB 0  
 PC 1.00

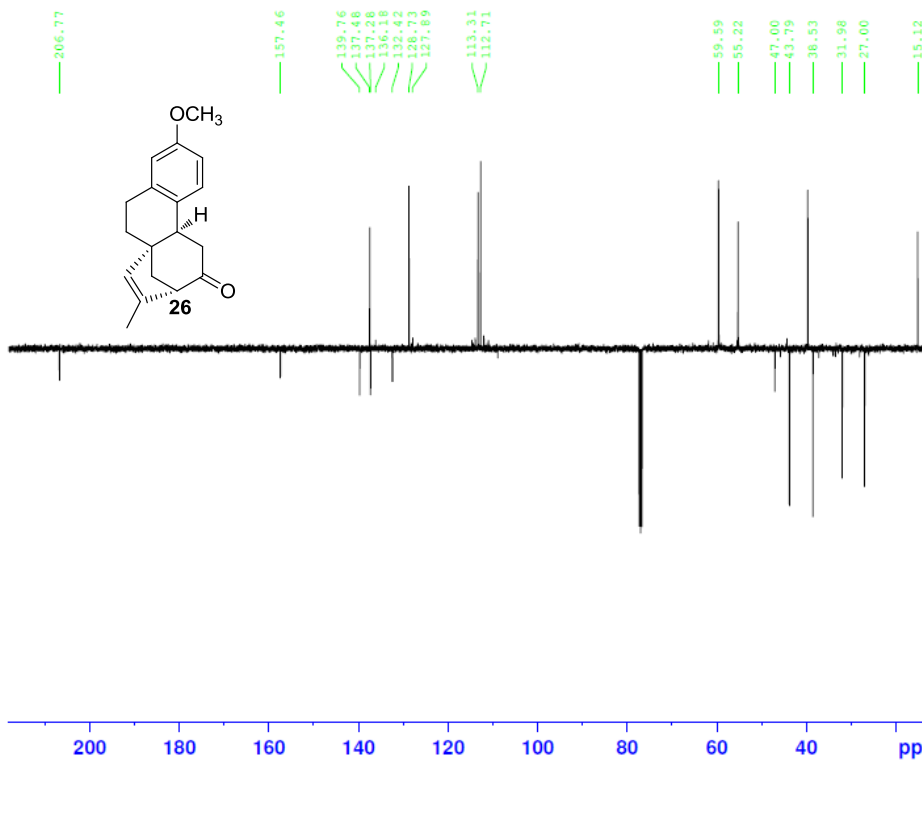

Current Data Parameters  
 NAME sjb\_81\_163fr4 APT  
 EXPNO 1  
 PROCNO 1

F2 - Acquisition Parameters  
 Date\_ 20140508  
 Time 12.29  
 INSTRUM spect  
 PROBHD 5 mm PABBO BB-  
 PULPROG jmod  
 TD 65536  
 SOLVENT CDCl3  
 NS 1024  
 DS 4  
 SWH 24038.461 Hz  
 FIDRES 0.366798 Hz  
 AQ 1.3631488 sec  
 RG 203  
 DW 20.800 usec  
 DE 6.50 usec  
 TE 301.2 K  
 CNST2 145.0000000  
 CNST11 1.0000000  
 D1 2.00000000 sec  
 D20 0.00689655 sec  
 TDO 1

----- CHANNEL f1 -----  
 SFO1 100.6293690 MHz  
 NUC1 13C  
 P1 8.00 usec  
 P2 16.00 usec  
 PLW1 56.13299942 W

----- CHANNEL f2 -----  
 SFO2 400.1516006 MHz  
 NUC2 1H  
 CPDPRG[2] waltz16  
 PCPD2 90.00 usec  
 PLW2 12.14200020 W  
 PLW12 0.24369000 W

F2 - Processing parameters  
 SI 32768  
 SF 100.6177980 MHz  
 WDW EM  
 SSB 0  
 LB 1.00 Hz  
 GB 0  
 PC 1.40

Area Percent Report

Data Path : C:\msdchem\1\DATA\  
Data File : sjb\_81\_163 fr4.D  
Acq On : 7 May 2014 16:54  
Operator : sjb  
Sample : sjb\_81\_163 fr4  
Misc :  
ALS Vial : 100 Sample Multiplier: 1

Integration Parameters: autoint1.e  
Integrator: ChemStation

Method : C:\msdchem\1\METHODS\ckr3.m  
Title :

Signal : TIC: sjb\_81\_163 fr4.D\data.ms

| peak # | R.T. min | first scan | max scan | last scan | PK TY | peak height | corr. area | corr. % max. | % of total |
|--------|----------|------------|----------|-----------|-------|-------------|------------|--------------|------------|
| 1      | 8.861    | 743        | 748      | 757       | BV    | 436595      | 6037089    | 1.74%        | 1.626%     |
| 2      | 9.316    | 817        | 827      | 862       | VB    | 18042696    | 347130619  | 100.00%      | 93.508%    |
| 3      | 9.585    | 867        | 875      | 897       | BB    | 1151425     | 18062141   | 5.20%        | 4.865%     |

Sum of corrected areas: 371229849

ckr3.m Mon May 12 15:24:00 2014

Abundance

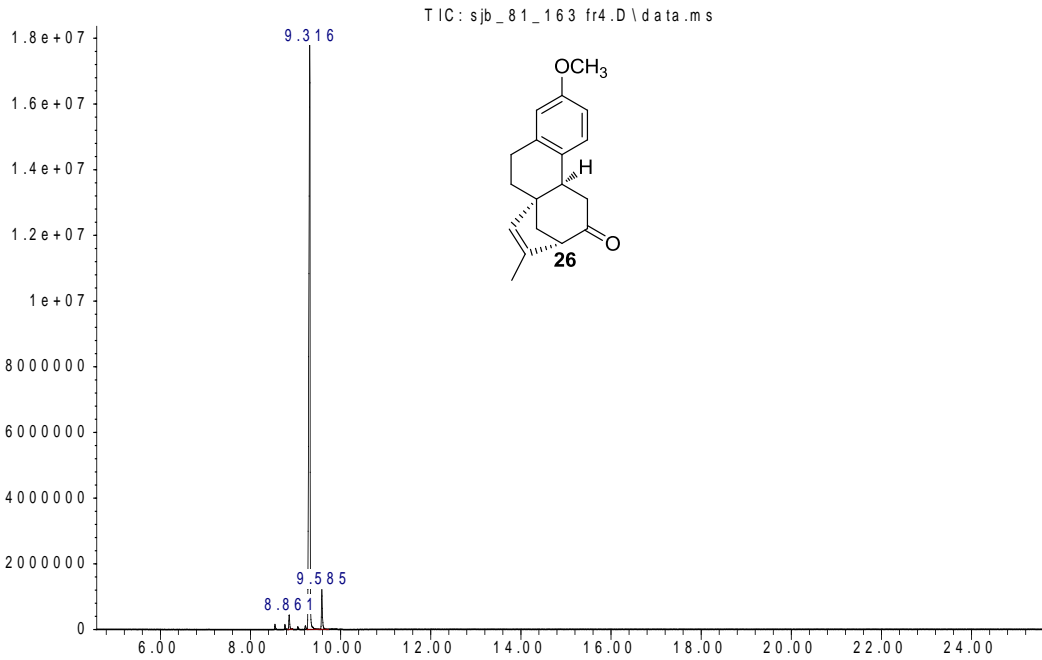

Time-->



Abundance

Scan 825 (9.302 min): sjb\_81\_163 fr4.D\data.ms

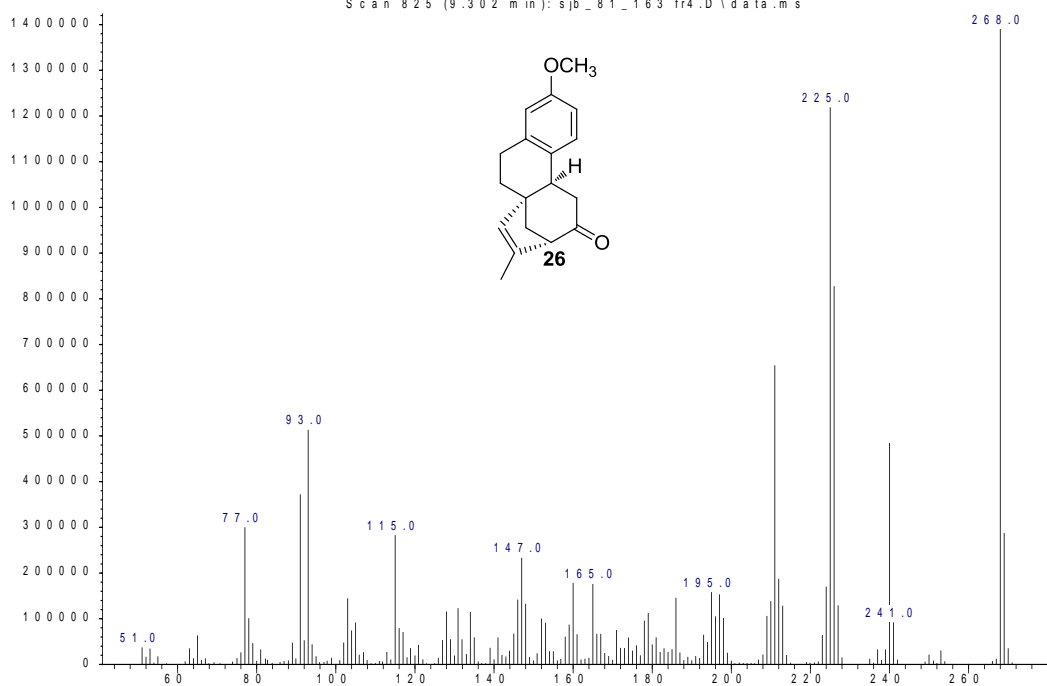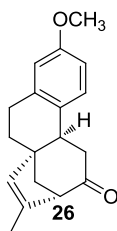

m/z-->

"sjb\_81\_163 fr3 Ep2" 2 1 C:\nmruser\malachowski\sburke

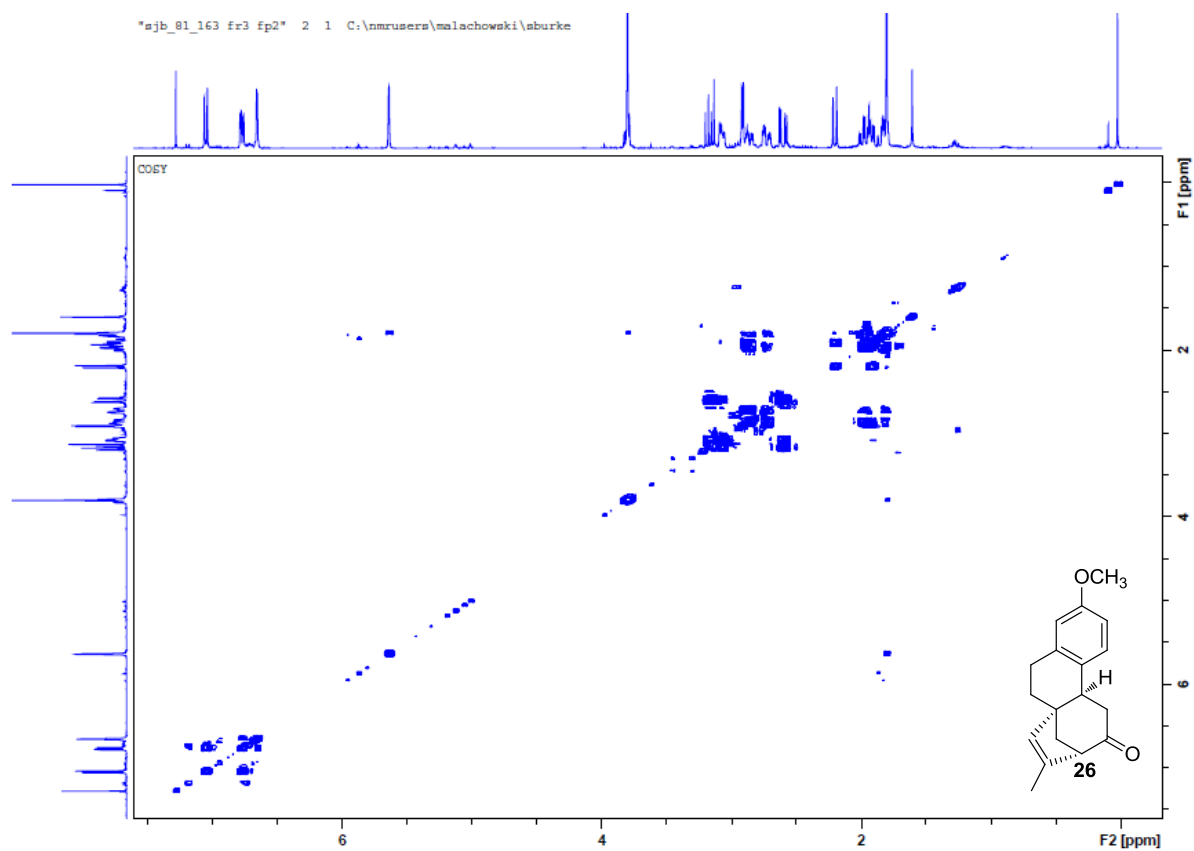

"ejb\_01\_163 Fz3 fp3" 2 1 C:\nmruers\malachowski\aburke

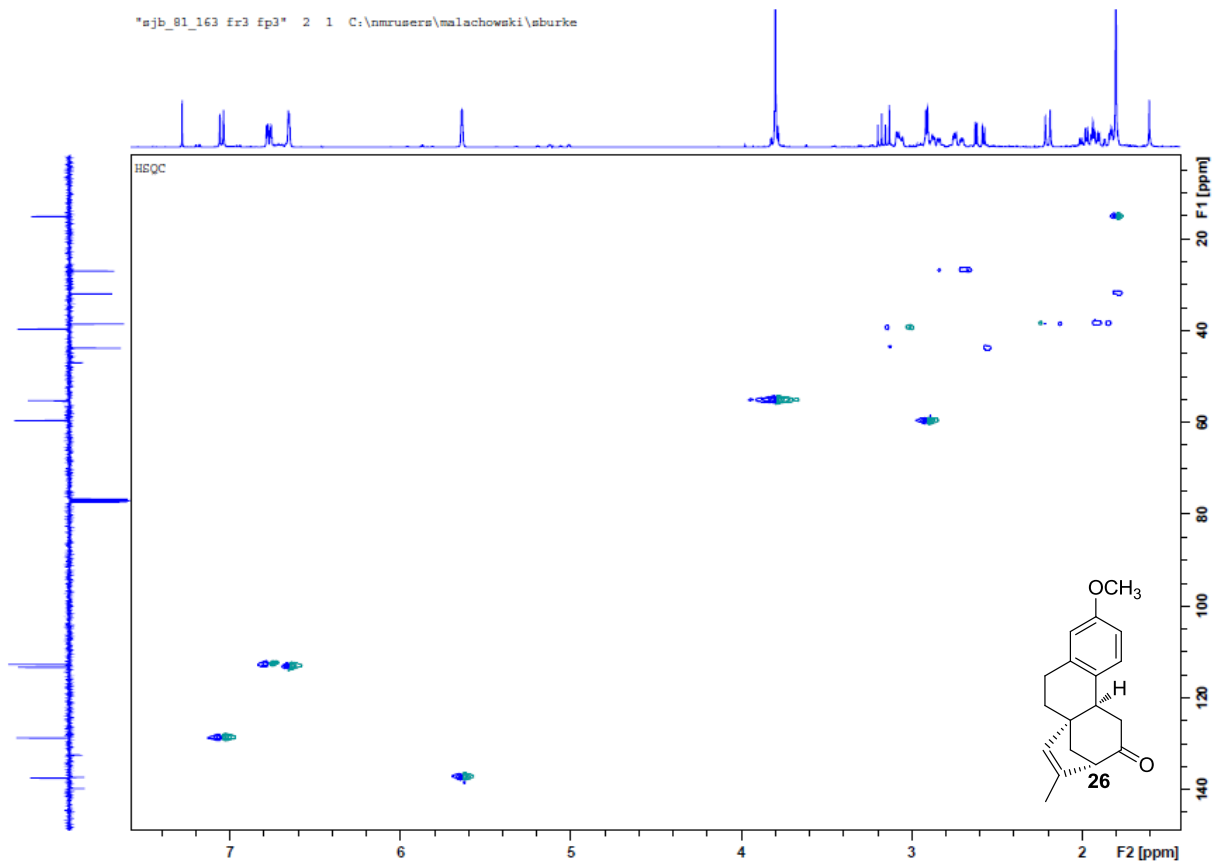

Supplement: NIHMS657430-supplement-Supplementary_Information.pdf [file NIHMS657430-supplement-Supplementary_Information.pdf]
